# Supplementary material for: Spatial meta-transcriptomics reveal associations of intratumor bacteria burden with lung cancer cells showing a distinct oncogenic signature
Source: J Immunother Cancer. 2022 Jul 6;10(7):e004698. doi: 10.1136/jitc-2022-004698 (PMC9260850; doi:10.1136/jitc-2022-004698)
Supplement: Supplementary data [file jitc-2022-004698supp002.xlsx]

## Sheet: nanoString CTA probe
Display Name	Tile Name	Formal Gene Name	Accession(s)	Exon(s)	Probe ID
A2M	A2M_01	A2M	NM_000014.6; NM_001347423.2; NM_001347424.2; NM_001347425.2; XM_006719056.3	30 (NM_001347425.2); 31 (NM_001347424.2,NM_000014.6,XM_006719056.3); 32 (NM_001347423.2)	166
A2M	A2M_02	A2M	NM_000014.6; NM_001347423.2; NM_001347424.2; NM_001347425.2; XM_006719056.3	10 (NM_001347423.2); 8 (NM_001347425.2); 9 (NM_001347424.2,NM_000014.6,XM_006719056.3)	167
A2M	A2M_03	A2M	NM_000014.6; NM_001347423.2; NM_001347424.2; NM_001347425.2; XM_006719056.3	16-17 (NM_001347425.2); 17-18 (NM_001347424.2,NM_000014.6,XM_006719056.3); 18-19 (NM_001347423.2)	168
A2M	A2M_04	A2M	NM_000014.6; NM_001347423.2; NM_001347424.2; NM_001347425.2; XM_006719056.3	2-3 (NM_001347424.2,NM_000014.6,NM_001347425.2,XM_006719056.3); 3-4 (NM_001347423.2)	169
A2M	A2M_05	A2M	NM_000014.6; NM_001347423.2; NM_001347424.2; NM_001347425.2; XM_006719056.3	10 (NM_001347425.2); 11 (NM_001347424.2,NM_000014.6,XM_006719056.3); 12 (NM_001347423.2)	170
ABCB1	ABCB1_01	ABCB1	NM_000927.4; NM_001348944.1; NM_001348945.1; NM_001348946.2	22-23 (NM_001348946.2); 23-24 (NM_000927.4); 24-25 (NM_001348944.1); 26-27 (NM_001348945.1)	171
ABCB1	ABCB1_02	ABCB1	NM_000927.4; NM_001348944.1; NM_001348945.1; NM_001348946.2	10 (NM_001348944.1); 12 (NM_001348945.1); 8 (NM_001348946.2); 9 (NM_000927.4)	172
ABCB1	ABCB1_03	ABCB1	NM_000927.4; NM_001348944.1; NM_001348945.1; NM_001348946.2	11 (NM_001348945.1); 7 (NM_001348946.2); 8 (NM_000927.4); 9 (NM_001348944.1)	173
ABCB1	ABCB1_04	ABCB1	NM_000927.4; NM_001348944.1; NM_001348945.1; NM_001348946.2	10 (NM_001348945.1); 6 (NM_001348946.2); 7 (NM_000927.4); 8 (NM_001348944.1)	174
ABCB1	ABCB1_05	ABCB1	NM_000927.4; NM_001348944.1; NM_001348945.1; NM_001348946.2	20 (NM_001348946.2); 21 (NM_000927.4); 22 (NM_001348944.1); 24 (NM_001348945.1)	175
ABL1	ABL1_01	ABL1	NM_005157.6; NM_007313.2	4 (NM_007313.2,NM_005157.6)	181
ABL1	ABL1_02	ABL1	NM_005157.6; NM_007313.2	2 (NM_007313.2,NM_005157.6)	182
ABL1	ABL1_03	ABL1	NM_005157.6; NM_007313.2	11 (NM_007313.2,NM_005157.6)	183
ABL1	ABL1_04	ABL1	NM_005157.6; NM_007313.2	11 (NM_007313.2,NM_005157.6)	184
ABL1	ABL1_05	ABL1	NM_005157.6; NM_007313.2	1-2 (NM_007313.2,NM_005157.6)	185
ACOT12	ACOT12_01	ACOT12	NM_130767.3; XM_006714531.2; XM_006714532.3; XM_017009045.1; XM_017009046.1; XM_017009047.1; XM_024454366.1	2-3 (XM_017009046.1,XM_017009045.1,XM_017009047.1,XM_006714531.2,XM_006714532.3,NM_130767.3)	186
ACOT12	ACOT12_02	ACOT12	NM_130767.3; XM_006714531.2; XM_006714532.3; XM_017009045.1; XM_017009046.1; XM_017009047.1; XM_017009048.1; XM_024454366.1	4 (XM_017009048.1); 7 (XM_017009047.1,XM_024454366.1); 8 (XM_017009046.1,XM_017009045.1,XM_006714531.2,XM_006714532.3,NM_130767.3)	187
ACOT12	ACOT12_03	ACOT12	NM_130767.3; XM_006714531.2; XM_017009045.1; XM_017009046.1; XM_017009047.1; XM_017009048.1; XM_024454366.1	10 (XM_017009048.1); 13 (XM_017009046.1,XM_017009047.1,XM_006714531.2,XM_024454366.1); 14 (XM_017009045.1,NM_130767.3)	188
ACOT12	ACOT12_04	ACOT12	NM_130767.3; XM_006714531.2; XM_006714532.3; XM_017009045.1; XM_017009046.1; XM_017009047.1; XM_017009048.1; XM_024454366.1	2-3 (XM_017009048.1); 5-6 (XM_017009047.1,XM_024454366.1); 6-7 (XM_017009046.1,XM_017009045.1,XM_006714531.2,XM_006714532.3,NM_130767.3)	189
ACOT12	ACOT12_05	ACOT12	NM_130767.3; XM_006714531.2; XM_006714532.3; XM_017009045.1; XM_017009046.1; XM_017009047.1; XM_017009048.1; XM_024454366.1	12 (XM_017009046.1,XM_017009047.1,XM_006714531.2,XM_006714532.3,XM_024454366.1); 13 (XM_017009045.1,NM_130767.3); 9 (XM_017009048.1)	190
ACSF3	ACSF3_01	ACSF3	NM_001127214.4; NM_001243279.3; NM_001284316.2; NM_174917.5; NR_104293.2; NR_147928.2; NR_147929.2; XM_005256293.2; XM_011522942.1; XM_011522943.1; XM_017023018.1; XM_017023019.1; XM_017023020.2; XM_017023021.1; XM_024450186.1; XM_024450187.1; XR_001751864.2; XR_001751865.1; XR_933238.2; XR_933240.3	3 (XM_024450186.1,NM_001284316.2,XM_017023020.2,XM_024450187.1); 4 (NM_001127214.4,XM_011522943.1); 5 (NR_104293.2,NR_147929.2,XR_001751865.1,XR_933240.3,XM_017023021.1,XM_011522942.1,XM_017023019.1,XM_005256293.2,XR_001751864.2,XM_017023018.1,XR_933238.2,NM_174917.5,NM_001243279.3,NR_147928.2)	191
ACSF3	ACSF3_02	ACSF3	NM_001243279.3; NM_174917.5; NR_104293.2; NR_147928.2; NR_147929.2; XM_005256293.2; XM_011522942.1; XM_017023018.1; XM_017023019.1; XM_017023021.1; XR_001751864.2; XR_001751865.1; XR_933238.2; XR_933240.3	2 (NR_104293.2,NR_147929.2,XR_001751865.1,XR_933240.3,XM_017023021.1,XM_011522942.1,XM_017023019.1,XM_005256293.2,XR_001751864.2,XM_017023018.1,XR_933238.2,NM_174917.5,NM_001243279.3,NR_147928.2)	192
ACSF3	ACSF3_03	ACSF3	NM_001127214.4; NM_001243279.3; NM_001284316.2; NM_174917.5; NR_045667.2; NR_104293.2; NR_147928.2; NR_147929.2; XM_017023020.2; XM_024450187.1; XR_001751864.2; XR_933240.3	10 (NR_147929.2,NM_001127214.4,XR_001751864.2); 11 (NR_104293.2,NM_174917.5,NM_001243279.3); 12 (XR_933240.3,NR_147928.2); 5 (NR_045667.2); 8 (XM_017023020.2); 9 (NM_001284316.2,XM_024450187.1)	193
ACSF3	ACSF3_04	ACSF3	NM_001127214.4; NM_001243279.3; NM_001284316.2; NM_174917.5; NR_045667.2; NR_104293.2; NR_147928.2; NR_147929.2; XM_017023020.2	10 (NR_147929.2,NM_001127214.4); 11 (NR_104293.2,NM_174917.5,NM_001243279.3); 12 (NR_147928.2); 5 (NR_045667.2); 8 (XM_017023020.2); 9 (NM_001284316.2)	194
ACSF3	ACSF3_05	ACSF3	NM_001127214.4; NM_001243279.3; NM_001284316.2; NM_174917.5; NR_104293.2; NR_147928.2; NR_147929.2; XM_005256293.2; XM_011522942.1; XM_011522943.1; XM_017023018.1; XM_017023019.1; XM_017023020.2; XM_017023021.1; XM_024450186.1; XM_024450187.1; XR_001751864.2; XR_001751865.1; XR_933238.2; XR_933240.3	2 (XM_024450186.1,NM_001284316.2,XM_017023020.2,XM_024450187.1); 3 (NM_001127214.4,XM_011522943.1); 4 (NR_104293.2,NR_147929.2,XR_001751865.1,XR_933240.3,XM_017023021.1,XM_011522942.1,XM_017023019.1,XM_005256293.2,XR_001751864.2,XM_017023018.1,XR_933238.2,NM_174917.5,NM_001243279.3,NR_147928.2)	195
ACTA2	ACTA2_01	ACTA2	NM_001141945.2; NM_001320855.1; NM_001613.4	2 (NM_001613.4,NM_001141945.2,NM_001320855.1)	196
ACTA2	ACTA2_02	ACTA2	NM_001141945.2; NM_001320855.1; NM_001613.4	2 (NM_001613.4,NM_001141945.2,NM_001320855.1)	197
ACTA2	ACTA2_03	ACTA2	NM_001141945.2; NM_001320855.1; NM_001613.4	2 (NM_001613.4,NM_001141945.2,NM_001320855.1)	198
ACTA2	ACTA2_04	ACTA2	NM_001141945.2; NM_001320855.1; NM_001613.4	2-3 (NM_001613.4,NM_001141945.2,NM_001320855.1)	199
ACTA2	ACTA2_05	ACTA2	NM_001141945.2; NM_001320855.1; NM_001613.4	4-5 (NM_001613.4,NM_001141945.2,NM_001320855.1)	200
ACTR3B	ACTR3B_01	ACTR3B	NM_001040135.2; NM_001350940.1; NM_001350941.1; NM_001350942.1; NM_001350943.1; NM_001350944.1; NM_001350945.1; NM_001350946.1; NM_020445.6; NR_146946.1; NR_146947.1; NR_146948.1; NR_146949.1; NR_146950.1; NR_146951.1; XM_017012463.1; XM_017012465.1	10 (NM_001040135.2,NM_001350943.1); 11 (NR_146948.1,NM_001350940.1,NM_001350941.1,NM_001350944.1,NR_146950.1,NR_146949.1); 12 (NR_146951.1,NR_146946.1,NM_001350945.1,XM_017012463.1,NM_020445.6,NM_001350942.1,NR_146947.1); 9 (XM_017012465.1,NM_001350946.1)	206
ACTR3B	ACTR3B_02	ACTR3B	NM_001040135.2; NM_001350940.1; NM_001350941.1; NM_001350942.1; NM_001350943.1; NM_001350944.1; NM_001350945.1; NM_001350946.1; NM_020445.6; NR_146946.1; NR_146947.1; NR_146948.1; NR_146949.1; NR_146950.1; NR_146951.1; XM_017012463.1; XM_017012465.1	10 (NM_001040135.2,NM_001350943.1); 11 (NR_146948.1,NM_001350940.1,NM_001350941.1,NM_001350944.1,NR_146950.1,NR_146949.1); 12 (NR_146951.1,NR_146946.1,NM_001350945.1,XM_017012463.1,NM_020445.6,NM_001350942.1,NR_146947.1); 9 (XM_017012465.1,NM_001350946.1)	207
ACTR3B	ACTR3B_03	ACTR3B	NM_001040135.2; NM_001350940.1; NM_001350941.1; NM_001350942.1; NM_001350943.1; NM_001350944.1; NM_001350945.1; NM_001350946.1; NM_020445.6; NR_146946.1; NR_146947.1; NR_146948.1; NR_146949.1; NR_146950.1; NR_146951.1; XM_017012463.1; XM_017012465.1	10 (NM_001040135.2,NM_001350943.1); 11 (NR_146948.1,NM_001350940.1,NM_001350941.1,NM_001350944.1,NR_146950.1,NR_146949.1); 12 (NR_146951.1,NR_146946.1,NM_001350945.1,XM_017012463.1,NM_020445.6,NM_001350942.1,NR_146947.1); 9 (XM_017012465.1,NM_001350946.1)	208
ACTR3B	ACTR3B_04	ACTR3B	NM_001040135.2; NM_001350940.1; NM_001350941.1; NM_001350942.1; NM_001350943.1; NM_001350944.1; NM_001350945.1; NM_001350946.1; NM_020445.6; NR_146946.1; NR_146947.1; NR_146948.1; NR_146949.1; NR_146950.1; NR_146951.1; XM_017012463.1; XM_017012465.1	10 (NM_001040135.2,NM_001350943.1); 11 (NR_146948.1,NM_001350940.1,NM_001350941.1,NM_001350944.1,NR_146950.1,NR_146949.1); 12 (NR_146951.1,NR_146946.1,NM_001350945.1,XM_017012463.1,NM_020445.6,NM_001350942.1,NR_146947.1); 9 (XM_017012465.1,NM_001350946.1)	209
ACTR3B	ACTR3B_05	ACTR3B	NM_001040135.2; NM_001350940.1; NM_001350941.1; NM_001350942.1; NM_001350943.1; NM_001350944.1; NM_001350945.1; NM_001350946.1; NM_020445.6; NR_146946.1; NR_146947.1; NR_146948.1; NR_146949.1; NR_146950.1; NR_146951.1; XM_006716065.2; XM_006716066.1; XM_006716067.4; XM_011516425.2; XM_011516426.2; XM_011516427.1; XM_017012460.1; XM_017012461.1	1 (NR_146951.1,NR_146948.1,NR_146946.1,NM_001350940.1,NM_001350945.1,NM_001040135.2,NM_001350941.1,NM_001350944.1,NM_001350946.1,NR_146950.1,NM_020445.6,NM_001350942.1,NR_146947.1,NR_146949.1,NM_001350943.1,XM_017012461.1,XM_017012460.1,XM_011516426.2,XM_006716067.4,XM_006716065.2,XM_011516427.1,XM_006716066.1,XM_011516425.2)	210
ACVR1B	ACVR1B_01	ACVR1B	NM_004302.5; NM_020327.3; NM_020328.4	10 (NM_020328.4); 9 (NM_020327.3,NM_004302.5)	211
ACVR1B	ACVR1B_02	ACVR1B	NM_004302.5; NM_020327.3; NM_020328.4	10 (NM_020328.4); 9 (NM_020327.3,NM_004302.5)	212
ACVR1B	ACVR1B_03	ACVR1B	NM_004302.5; NM_020327.3; NM_020328.4; XM_011538966.3; XM_017020201.2	7 (XM_017020201.2); 8 (NM_020327.3,NM_004302.5,XM_011538966.3); 9 (NM_020328.4)	213
ACVR1B	ACVR1B_04	ACVR1B	NM_004302.5; NM_020327.3; NM_020328.4	10 (NM_020328.4); 9 (NM_020327.3,NM_004302.5)	214
ACVR1B	ACVR1B_05	ACVR1B	NM_004302.5; NM_020327.3; NM_020328.4	10 (NM_020328.4); 9 (NM_020327.3,NM_004302.5)	215
ACVR1C	ACVR1C_01	ACVR1C	NM_001111031.1; NM_001111032.2; NM_001111033.2; NM_145259.3	7 (NM_001111033.2); 8 (NM_001111032.2); 9 (NM_145259.3,NM_001111031.1)	216
ACVR1C	ACVR1C_02	ACVR1C	NM_001111031.1; NM_001111032.2; NM_001111033.2; NM_145259.3	7 (NM_001111033.2); 8 (NM_001111032.2); 9 (NM_145259.3,NM_001111031.1)	217
ACVR1C	ACVR1C_03	ACVR1C	NM_001111031.1; NM_001111032.2; NM_001111033.2; NM_145259.3	4 (NM_001111033.2); 5 (NM_001111032.2); 6 (NM_145259.3,NM_001111031.1)	218
ACVR1C	ACVR1C_04	ACVR1C	NM_001111031.1; NM_001111032.2; NM_001111033.2; NM_145259.3	6 (NM_001111033.2); 7 (NM_001111032.2); 8 (NM_145259.3,NM_001111031.1)	219
ACVR1C	ACVR1C_05	ACVR1C	NM_001111031.1; NM_001111032.2; NM_001111033.2; NM_145259.3	7 (NM_001111033.2); 8 (NM_001111032.2); 9 (NM_145259.3,NM_001111031.1)	220
ACVR2A	ACVR2A_01	ACVR2A	NM_001278579.2; NM_001278580.1; NM_001616.5	7 (NM_001278580.1,NM_001616.5); 8 (NM_001278579.2)	221
ACVR2A	ACVR2A_02	ACVR2A	NM_001278579.2; NM_001278580.1; NM_001616.5	10 (NM_001278580.1,NM_001616.5); 11 (NM_001278579.2)	222
ACVR2A	ACVR2A_03	ACVR2A	NM_001278579.2; NM_001616.5	1 (NM_001616.5); 1-2 (NM_001278579.2)	223
ACVR2A	ACVR2A_04	ACVR2A	NM_001278579.2; NM_001278580.1; NM_001616.5	2 (NM_001278580.1,NM_001616.5); 3 (NM_001278579.2)	224
ACVR2A	ACVR2A_05	ACVR2A	NM_001278579.2; NM_001278580.1; NM_001616.5	2 (NM_001278580.1,NM_001616.5); 3 (NM_001278579.2)	225
ACY1	ACY1_01	ABHD14A-ACY1; ACY1	NM_000666.3; NM_001198895.2; NM_001198896.2; NM_001198897.2; NM_001316331.2	2-3 (NM_001198895.2,NM_001198897.2,NM_001198896.2,NM_000666.3)	226
ACY1	ACY1_02	ABHD14A-ACY1; ACY1	NM_000666.3; NM_001198895.2; NM_001198896.2; NM_001198897.2; NM_001198898.2; NM_001316331.2	3-4 (NM_001198898.2); 4-5 (NM_001198895.2,NM_001198897.2,NM_001198896.2,NM_000666.3)	227
ACY1	ACY1_03	ABHD14A-ACY1; ACY1	NM_000666.3; NM_001198895.2; NM_001198896.2; NM_001198897.2; NM_001198898.2; NM_001316331.2	11-12 (NM_001198897.2,NM_001198896.2); 12-13 (NM_001198898.2); 13-14 (NM_001198895.2,NM_000666.3)	228
ACY1	ACY1_04	ABHD14A-ACY1; ACY1	NM_000666.3; NM_001198895.2; NM_001198896.2; NM_001198897.2; NM_001198898.2; NM_001316331.2	13 (NM_001198897.2,NM_001198896.2); 14 (NM_001198898.2); 15 (NM_001198895.2,NM_000666.3)	229
ACY1	ACY1_05	ABHD14A-ACY1; ACY1	NM_000666.3; NM_001198895.2; NM_001198896.2; NM_001198897.2; NM_001198898.2; NM_001316331.2	13 (NM_001198897.2,NM_001198896.2); 14 (NM_001198898.2); 15 (NM_001198895.2,NM_000666.3)	230
ADA	ADA_01	ADA	NM_000022.4; NM_001322050.1; NM_001322051.1; NR_136160.1	11 (NR_136160.1,NM_001322050.1,NM_001322051.1); 12 (NM_000022.4)	231
ADA	ADA_02	ADA	NM_000022.4; NM_001322050.1; NM_001322051.1; NR_136160.1	3 (NR_136160.1,NM_001322050.1,NM_001322051.1,NM_000022.4)	232
ADA	ADA_03	ADA	NM_000022.4; NM_001322050.1; NM_001322051.1; NR_136160.1	10 (NM_000022.4); 9 (NR_136160.1,NM_001322050.1,NM_001322051.1)	233
ADA	ADA_04	ADA	NM_000022.4; NM_001322050.1; NM_001322051.1; NR_136160.1	11 (NR_136160.1,NM_001322050.1,NM_001322051.1); 12 (NM_000022.4)	234
ADA	ADA_05	ADA	NM_000022.4; NM_001322050.1; NM_001322051.1; NR_136160.1	7 (NM_001322050.1,NM_001322051.1); 8 (NR_136160.1,NM_000022.4)	235
ADAM12	ADAM12_01	ADAM12	NM_001288973.2; NM_001288974.2; NM_001288975.2; NM_003474.6; NM_021641.5; XM_017016705.1	10 (XM_017016705.1); 11 (NM_003474.6,NM_001288975.2,NM_001288974.2,NM_001288973.2,NM_021641.5)	236
ADAM12	ADAM12_02	ADAM12	NM_001288973.2; NM_001288974.2; NM_001288975.2; NM_003474.6; NM_021641.5; XM_017016705.1; XM_017016706.1; XM_024448210.1	13 (XM_017016705.1); 14 (NM_003474.6,NM_001288975.2,NM_001288974.2,NM_001288973.2,NM_021641.5); 3 (XM_024448210.1); 4 (XM_017016706.1)	237
ADAM12	ADAM12_03	ADAM12	NM_001288973.2; NM_003474.6; XM_017016705.1; XM_017016706.1; XM_024448210.1	12 (XM_024448210.1); 13 (XM_017016706.1); 22 (XM_017016705.1); 23 (NM_003474.6,NM_001288973.2)	238
ADAM12	ADAM12_04	ADAM12	NM_001288973.2; NM_001288974.2; NM_001288975.2; NM_003474.6; NM_021641.5; XM_017016705.1	3 (XM_017016705.1); 4 (NM_003474.6,NM_001288975.2,NM_001288974.2,NM_001288973.2,NM_021641.5)	239
ADAM12	ADAM12_05	ADAM12	NM_001288973.2; NM_001288974.2; NM_001288975.2; NM_003474.6; NM_021641.5; XM_017016705.1	8 (XM_017016705.1); 9 (NM_003474.6,NM_001288975.2,NM_001288974.2,NM_001288973.2,NM_021641.5)	240
ADGRE1	ADGRE1_01	ADGRE1	NM_001256252.2; NM_001256253.2; NM_001256254.2; NM_001256255.2; NM_001974.5; XM_011527794.1	11-12 (NM_001256252.2); 12-13 (NM_001256253.2,NM_001974.5); 14-15 (XM_011527794.1); 9-10 (NM_001256255.2,NM_001256254.2)	241
ADGRE1	ADGRE1_02	ADGRE1	NM_001256252.2; NM_001256253.2; NM_001256254.2; NM_001256255.2; NM_001974.5; XM_011527794.1	10 (NM_001256255.2,NM_001256254.2); 12 (NM_001256252.2); 13 (NM_001256253.2,NM_001974.5); 15 (XM_011527794.1)	242
ADGRE1	ADGRE1_03	ADGRE1	NM_001256252.2; NM_001256253.2; NM_001256254.2; NM_001974.5; XM_011527794.1	4-5 (NM_001256254.2); 6-7 (NM_001256252.2); 7-8 (NM_001256253.2,NM_001974.5); 9-10 (XM_011527794.1)	243
ADGRE1	ADGRE1_04	ADGRE1	NM_001256252.2; NM_001256253.2; NM_001974.5; XM_011527794.1	5 (NM_001256252.2); 6 (NM_001256253.2,NM_001974.5); 8 (XM_011527794.1)	244
ADGRE1	ADGRE1_05	ADGRE1	NM_001256252.2; NM_001256254.2; NM_001256255.2; NM_001974.5; XM_011527794.1	11-12 (NM_001256255.2,NM_001256254.2); 13-14 (NM_001256252.2); 14-15 (NM_001974.5); 16-17 (XM_011527794.1)	245
ADGRE5	ADGRE5_01	ADGRE5	NM_001025160.2; NM_001784.5; NM_078481.4; XM_011528451.3	7-8 (NM_001784.5); 8-9 (NM_001025160.2); 9-10 (XM_011528451.3,NM_078481.4)	246
ADGRE5	ADGRE5_02	ADGRE5	NM_001025160.2; NM_001784.5; NM_078481.4; XM_011528451.3	10 (XM_011528451.3,NM_078481.4); 8 (NM_001784.5); 9 (NM_001025160.2)	247
ADGRE5	ADGRE5_03	ADGRE5	NM_001025160.2; NM_001784.5; NM_078481.4; XM_011528451.3	10 (NM_001784.5); 11 (NM_001025160.2); 12 (XM_011528451.3,NM_078481.4)	248
ADGRE5	ADGRE5_04	ADGRE5	NM_001025160.2; NM_001784.5; NM_078481.4; XM_011528451.3	10 (NM_001784.5); 11 (NM_001025160.2); 12 (XM_011528451.3,NM_078481.4)	249
ADGRE5	ADGRE5_05	ADGRE5	NM_001025160.2; NM_001784.5; NM_078481.4; XM_011528451.3	11-12 (NM_001784.5); 12-13 (NM_001025160.2); 13-14 (XM_011528451.3,NM_078481.4)	250
ADH1A/B/C	ADH1A/B/C_01	ADH1A; ADH1C	NM_000667.4; NM_000669.5; NR_133005.2	5 (NM_000667.4)	1
ADH1A/B/C	ADH1A/B/C_02	ADH1A; ADH1B; ADH1C	NM_000667.4; NM_000668.6; NM_000669.5; NM_001286650.2; NR_133005.2	3 (NR_133005.2,NM_000669.5)	2
ADH1A/B/C	ADH1A/B/C_03	ADH1B; ADH1C	NM_000668.6; NM_000669.5; NM_001286650.2; NR_133005.2	3-4 (NR_133005.2,NM_000669.5)	3
ADH1A/B/C	ADH1A/B/C_04	ADH1A; ADH1B; ADH1C	NM_000667.4; NM_000668.6; NM_000669.5; NM_001286650.2; NR_133005.2	6 (NR_133005.2,NM_000669.5)	4
ADH1A/B/C	ADH1A/B/C_05	ADH1A; ADH1B; ADH1C	NM_000667.4; NM_000668.6; NM_000669.5; NM_001286650.2; NR_133005.2	6-7 (NR_133005.2,NM_000669.5)	5
ADH4	ADH4_01	ADH4	NM_000670.5; NM_001306171.1; NM_001306172.1	7 (NM_000670.5); 8 (NM_001306171.1,NM_001306172.1)	251
ADH4	ADH4_02	ADH4	NM_000670.5; NM_001306171.1; NM_001306172.1	8-9 (NM_000670.5); 9-10 (NM_001306171.1,NM_001306172.1)	252
ADH4	ADH4_03	ADH4	NM_000670.5; NM_001306171.1; NM_001306172.1	3 (NM_000670.5); 4 (NM_001306171.1,NM_001306172.1)	253
ADH4	ADH4_04	ADH4	NM_000670.5; NM_001306171.1; NM_001306172.1	5 (NM_000670.5); 6 (NM_001306171.1,NM_001306172.1)	254
ADH4	ADH4_05	ADH4	NM_000670.5; NM_001306171.1; NM_001306172.1	8 (NM_000670.5); 9 (NM_001306171.1,NM_001306172.1)	255
ADH6	ADH6_01	ADH6	NM_000672.4; NM_001102470.2; NR_132990.2	7 (NR_132990.2); 8 (NM_000672.4); 9 (NM_001102470.2)	256
ADH6	ADH6_02	ADH6	NM_000672.4; NM_001102470.2; NR_132990.2	7 (NR_132990.2); 8 (NM_000672.4); 9 (NM_001102470.2)	257
ADH6	ADH6_03	ADH6	NM_000672.4; NM_001102470.2; NR_132990.2	7 (NR_132990.2); 8 (NM_000672.4); 9 (NM_001102470.2)	258
ADH6	ADH6_04	ADH6	NM_000672.4; NM_001102470.2; NR_132990.2	5 (NR_132990.2); 7 (NM_001102470.2,NM_000672.4)	259
ADH6	ADH6_05	ADH6	NM_000672.4; NM_001102470.2; NR_132990.2	7 (NR_132990.2); 8 (NM_000672.4); 9 (NM_001102470.2)	260
ADM	ADM_01	ADM	NM_001124.3	2 (NM_001124.3)	261
ADM	ADM_02	ADM	NM_001124.3	4 (NM_001124.3)	262
ADM	ADM_03	ADM	NM_001124.3	4 (NM_001124.3)	263
ADM	ADM_04	ADM	NM_001124.3	2 (NM_001124.3)	264
ADM	ADM_05	ADM	NM_001124.3	1 (NM_001124.3)	265
ADORA2A	ADORA2A_01	ADORA2A	NM_001278497.1	1-2 (NM_001278497.1)	266
AFDN	AFDN_01	AFDN	NM_001291964.1	1 (NM_001291964.1)	267
AFDN	AFDN_02	AFDN	NM_001291964.1	1-2 (NM_001291964.1)	268
AICDA	AICDA_01	AICDA	NM_001330343.2; NM_020661.4	5 (NM_001330343.2,NM_020661.4)	269
AICDA	AICDA_02	AICDA	NM_001330343.2; NM_020661.4	5 (NM_001330343.2,NM_020661.4)	270
AICDA	AICDA_03	AICDA	NM_001330343.2; NM_020661.4; XM_011520773.2	4 (XM_011520773.2); 5 (NM_001330343.2,NM_020661.4)	271
AICDA	AICDA_04	AICDA	NM_001330343.2; NM_020661.4	5 (NM_001330343.2,NM_020661.4)	272
AICDA	AICDA_05	AICDA	NM_001330343.2; NM_020661.4	5 (NM_001330343.2,NM_020661.4)	273
AIRE	AIRE_01	AIRE	NM_000383.4	4-5 (NM_000383.4)	274
AIRE	AIRE_02	AIRE	NM_000383.4	14 (NM_000383.4)	275
AIRE	AIRE_03	AIRE	NM_000383.4	5-6 (NM_000383.4)	276
AIRE	AIRE_04	AIRE	NM_000383.4	5-6 (NM_000383.4)	277
AIRE	AIRE_05	AIRE	NM_000383.4	14 (NM_000383.4)	278
AKAP1	AKAP1_01	AKAP1	NM_001242902.1; NM_001242903.1; NM_001370423.1; NM_001370424.1; NM_001370425.1; NM_001370426.1; NM_001370427.1; NM_003488.4; XM_017025190.2; XM_024450960.1; XR_001752655.2	10-11 (XR_001752655.2,NM_001370423.1,NM_001242903.1,NM_001370425.1,NM_001242902.1,NM_001370427.1); 9-10 (NM_001370424.1,XM_024450960.1,NM_003488.4,XM_017025190.2,NM_001370426.1)	279
AKAP1	AKAP1_02	AKAP1	NM_001242902.1; NM_001242903.1; NM_001370423.1; NM_001370424.1; NM_001370425.1; NM_001370426.1; NM_001370427.1; NM_003488.4; XM_017025190.2; XM_024450960.1; XR_001752655.2	7 (NM_001370424.1,XM_024450960.1,NM_003488.4,XM_017025190.2,NM_001370426.1); 8 (XR_001752655.2,NM_001370423.1,NM_001242903.1,NM_001370425.1,NM_001242902.1,NM_001370427.1)	280
AKAP1	AKAP1_03	AKAP1	NM_001242902.1; NM_001242903.1; NM_001370423.1; NM_001370424.1; NM_001370425.1; NM_001370426.1; NM_001370427.1; NM_003488.4; XM_017025190.2; XM_024450960.1; XR_001752655.2	4-5 (NM_001370424.1,XM_024450960.1,NM_003488.4,XM_017025190.2,NM_001370426.1); 5-6 (XR_001752655.2,NM_001370423.1,NM_001242903.1,NM_001370425.1,NM_001242902.1,NM_001370427.1)	281
AKAP1	AKAP1_04	AKAP1	NM_001242902.1; NM_001242903.1; NM_001370423.1; NM_001370424.1; NM_001370425.1; NM_001370426.1; NM_001370427.1; NM_003488.4; XM_017025190.2; XM_024450960.1; XR_001752655.2	7 (NM_001370424.1,XM_024450960.1,NM_003488.4,XM_017025190.2,NM_001370426.1); 8 (XR_001752655.2,NM_001370423.1,NM_001242903.1,NM_001370425.1,NM_001242902.1,NM_001370427.1)	282
AKAP1	AKAP1_05	AKAP1	NM_001242902.1; NM_001242903.1; NM_001370423.1; NM_001370424.1; NM_001370425.1; NM_001370426.1; NM_001370427.1; NM_003488.4; XM_017025190.2; XM_024450960.1; XR_001752655.2	11 (NM_001370424.1,XM_024450960.1,NM_003488.4,XM_017025190.2,NM_001370426.1); 12 (XR_001752655.2,NM_001370423.1,NM_001242903.1,NM_001370425.1,NM_001242902.1,NM_001370427.1)	283
AKR1C4	AKR1C4_01	AKR1C4	NM_001818.4	3-4 (NM_001818.4)	284
AKR1C4	AKR1C4_02	AKR1C4	NM_001818.4	6-7 (NM_001818.4)	285
AKR1C4	AKR1C4_03	AKR1C4	NM_001818.4	7 (NM_001818.4)	286
AKR1C4	AKR1C4_04	AKR1C4	NM_001818.4	7-8 (NM_001818.4)	287
AKR1C4	AKR1C4_05	AKR1C4	NM_001818.4	8 (NM_001818.4)	288
AKT1	AKT1_01	AKT1	NM_001014431.2; NM_001014432.2; NM_005163.2; XR_002957536.1	2-3 (NM_001014431.2,NM_005163.2); 3-4 (XR_002957536.1)	289
AKT1	AKT1_02	AKT1	NM_001014431.2; NM_001014432.2; NM_005163.2; XR_002957536.1	6 (NM_001014431.2,NM_005163.2); 7 (XR_002957536.1)	290
AKT1	AKT1_03	AKT1	NM_001014431.2; NM_001014432.2; NM_005163.2; XR_002957536.1	5-6 (NM_001014431.2,NM_005163.2); 6-7 (XR_002957536.1)	291
AKT1	AKT1_04	AKT1	NM_001014431.2; NM_001014432.2; NM_005163.2; XR_002957536.1	10 (XR_002957536.1); 9 (NM_001014431.2,NM_005163.2)	292
AKT1	AKT1_05	AKT1	NM_001014431.2; NM_001014432.2; NM_005163.2; XR_002957536.1	12-13 (NM_001014431.2,NM_005163.2); 13 (XR_002957536.1)	293
AKT2	AKT2_01	AKT2	NM_001243027.3; NM_001243028.3; NM_001330511.1; NM_001626.6; XM_011526614.1; XM_011526615.1; XM_011526616.1; XM_011526618.1; XM_011526619.1; XM_011526620.1; XM_017026470.2; XM_024451416.1; XM_024451417.1	12 (NM_001330511.1); 13 (XM_024451417.1,NM_001243028.3); 14 (XM_024451416.1,XM_011526616.1,XM_011526619.1,NM_001626.6,XM_011526618.1,XM_011526615.1,XM_011526620.1,XM_011526614.1,NM_001243027.3); 15 (XM_017026470.2)	294
AKT2	AKT2_02	AKT2	NM_001243027.3; NM_001243028.3; NM_001330511.1; NM_001626.6; XM_011526614.1; XM_011526615.1; XM_011526616.1; XM_011526618.1; XM_011526619.1; XM_011526620.1; XM_011526622.2; XM_017026470.2; XM_024451416.1; XM_024451417.1	2-3 (NM_001243028.3,NM_001330511.1); 3-4 (XM_024451417.1,XM_024451416.1,XM_011526616.1,XM_011526619.1,NM_001626.6,XM_011526618.1,XM_011526615.1,XM_011526620.1,XM_011526614.1,NM_001243027.3,XM_011526622.2); 4-5 (XM_017026470.2)	295
AKT2	AKT2_03	AKT2	NM_001243027.3; NM_001243028.3; NM_001330511.1; NM_001626.6; XM_011526614.1; XM_011526615.1; XM_011526616.1; XM_011526618.1; XM_011526619.1; XM_011526620.1; XM_011526622.2; XM_017026470.2; XM_024451416.1; XM_024451417.1	6 (NM_001243028.3,NM_001330511.1); 7 (XM_024451417.1,XM_024451416.1,XM_011526616.1,XM_011526619.1,NM_001626.6,XM_011526618.1,XM_011526615.1,XM_011526620.1,XM_011526614.1,NM_001243027.3,XM_011526622.2); 8 (XM_017026470.2)	296
AKT2	AKT2_04	AKT2	NM_001243027.3; NM_001243028.3; NM_001330511.1; NM_001626.6; XM_011526614.1; XM_011526615.1; XM_011526616.1; XM_011526618.1; XM_011526619.1; XM_011526620.1; XM_011526622.2; XM_017026470.2; XM_024451416.1; XM_024451417.1	10 (XM_017026470.2); 8 (NM_001243028.3,NM_001330511.1); 9 (XM_024451417.1,XM_024451416.1,XM_011526616.1,XM_011526619.1,NM_001626.6,XM_011526618.1,XM_011526615.1,XM_011526620.1,XM_011526614.1,NM_001243027.3,XM_011526622.2)	297
AKT2	AKT2_05	AKT2	NM_001243027.3; NM_001243028.3; NM_001330511.1; NM_001626.6; XM_011526614.1; XM_011526615.1; XM_011526616.1; XM_011526618.1; XM_011526619.1; XM_011526620.1; XM_017026470.2; XM_024451416.1; XM_024451417.1	12 (NM_001330511.1); 13 (XM_024451417.1,NM_001243028.3); 14 (XM_024451416.1,XM_011526616.1,XM_011526619.1,NM_001626.6,XM_011526618.1,XM_011526615.1,XM_011526620.1,XM_011526614.1,NM_001243027.3); 15 (XM_017026470.2)	298
AKT3	AKT3_01	AKT3	NM_001206729.1; NM_001370074.1; NM_005465.7; NM_181690.2; XM_016999985.1; XM_024446000.1; XM_024446892.1; XM_024447938.1	4-5 (NM_181690.2,XM_024446892.1,XM_024446000.1,XM_024447938.1); 5-6 (NM_001206729.1,NM_001370074.1,NM_005465.7); 6-7 (XM_016999985.1)	299
AKT3	AKT3_02	AKT3	NM_001370074.1; NM_005465.7; XM_011544014.2; XM_016999985.1	14 (NM_001370074.1,NM_005465.7); 15 (XM_016999985.1); 7 (XM_011544014.2)	300
AKT3	AKT3_03	AKT3	NM_001370074.1; NM_005465.7; XM_011544014.2; XM_016999985.1	14 (NM_001370074.1,NM_005465.7); 15 (XM_016999985.1); 7 (XM_011544014.2)	301
AKT3	AKT3_04	AKT3	NM_001206729.1; NM_001370074.1; NM_005465.7; NM_181690.2; XM_016999985.1; XM_024446000.1; XM_024446892.1	10 (XM_016999985.1); 8 (NM_181690.2,XM_024446892.1,XM_024446000.1); 9 (NM_001206729.1,NM_001370074.1,NM_005465.7)	302
AKT3	AKT3_05	AKT3	NM_001370074.1; NM_005465.7; XM_011544014.2; XM_016999985.1	14 (NM_001370074.1,NM_005465.7); 15 (XM_016999985.1); 7 (XM_011544014.2)	303
ALCAM	ALCAM_01	ALCAM	NM_001243280.2; NM_001243281.1; NM_001627.4	5 (NM_001243280.2,NM_001627.4,NM_001243281.1)	304
ALCAM	ALCAM_02	ALCAM	NM_001243280.2; NM_001243281.1; NM_001243283.1; NM_001627.4	3 (NM_001243280.2,NM_001627.4,NM_001243281.1,NM_001243283.1)	305
ALCAM	ALCAM_03	ALCAM	NM_001243280.2; NM_001243281.1; NM_001627.4	3-4 (NM_001243280.2,NM_001627.4,NM_001243281.1)	306
ALCAM	ALCAM_04	ALCAM	NM_001243280.2; NM_001627.4	15 (NM_001243280.2); 16 (NM_001627.4)	307
ALCAM	ALCAM_05	ALCAM	NM_001243280.2; NM_001627.4	14-15 (NM_001243280.2); 15-16 (NM_001627.4)	308
ALDOA	ALDOA_01	ALDOA; LOC112694756	NM_001127617.2; NM_001243177.4; NM_001365304.1; NM_001365305.1; NM_001365307.2; NM_184041.5; NM_184043.2	12 (NM_001365305.1); 13 (NM_001365307.2); 14 (NM_001365304.1)	309
ALDOA	ALDOA_02	ALDOA; LOC112694756	NM_001127617.2; NM_001243177.4; NM_001365304.1; NM_001365305.1; NM_001365307.2; NM_184041.5; NM_184043.2	10 (NM_001365307.2); 11 (NM_001365304.1); 9 (NM_001365305.1)	310
ALDOC	ALDOC_01	ALDOC	NM_005165.3; XM_005257949.2; XM_011524556.2	10 (XM_011524556.2,XM_005257949.2); 9 (NM_005165.3)	311
ALDOC	ALDOC_02	ALDOC	NM_005165.3; XM_005257949.2; XM_011524556.2	3 (NM_005165.3); 4 (XM_011524556.2,XM_005257949.2)	312
ALDOC	ALDOC_03	ALDOC	NM_005165.3; XM_005257949.2; XM_011524556.2	10 (XM_011524556.2,XM_005257949.2); 9 (NM_005165.3)	313
ALDOC	ALDOC_04	ALDOC	NM_005165.3; XM_005257949.2; XM_011524556.2	10 (XM_011524556.2,XM_005257949.2); 9 (NM_005165.3)	314
ALDOC	ALDOC_05	ALDOC	NM_005165.3; XM_005257949.2; XM_011524556.2	3 (NM_005165.3); 4 (XM_011524556.2,XM_005257949.2)	315
ALK	ALK_01	ALK	NM_001353765.1; NM_004304.5; XM_024452778.1; XM_024452779.1	10 (NM_001353765.1); 11 (XM_024452779.1); 15 (XM_024452778.1); 29 (NM_004304.5)	316
ALK	ALK_02	ALK	NM_001353765.1; NM_004304.5; XM_024452778.1; XM_024452779.1	10 (NM_001353765.1); 11 (XM_024452779.1); 15 (XM_024452778.1); 29 (NM_004304.5)	317
ALK	ALK_03	ALK	NM_001353765.1; NM_004304.5; XM_024452778.1; XM_024452779.1	10 (NM_001353765.1); 11 (XM_024452779.1); 15 (XM_024452778.1); 29 (NM_004304.5)	318
ALK	ALK_04	ALK	NM_001353765.1; NM_004304.5; XM_024452778.1; XM_024452779.1	10 (XM_024452779.1); 14 (XM_024452778.1); 28 (NM_004304.5); 9 (NM_001353765.1)	319
ALK	ALK_05	ALK	NM_001353765.1; NM_004304.5; XM_024452778.1; XM_024452779.1	10 (XM_024452778.1); 24 (NM_004304.5); 5 (NM_001353765.1); 6 (XM_024452779.1)	320
ALKBH2	ALKBH2_01	ALKBH2	NM_001001655.2; NM_001145374.2; NM_001145375.1; NM_001205179.1; NM_001205180.1; XM_005253835.5; XM_005253836.1	2 (XM_005253835.5,NM_001001655.2,XM_005253836.1,NM_001205179.1,NM_001205180.1,NM_001145375.1,NM_001145374.2)	321
ALKBH2	ALKBH2_02	ALKBH2	NM_001001655.2; NM_001145374.2; NM_001145375.1; NM_001205179.1; NM_001205180.1; XM_005253835.5; XM_005253836.1	1 (XM_005253835.5,NM_001001655.2,XM_005253836.1,NM_001205179.1,NM_001205180.1,NM_001145375.1)	322
ALKBH2	ALKBH2_03	ALKBH2	NM_001001655.2; NM_001145374.2; NM_001145375.1; NM_001205179.1; NM_001205180.1; XM_005253835.5; XM_005253836.1	3 (XM_005253836.1,NM_001205179.1,NM_001205180.1); 4 (XM_005253835.5,NM_001001655.2,NM_001145375.1,NM_001145374.2)	323
ALKBH2	ALKBH2_04	ALKBH2	NM_001001655.2; NM_001145374.2; NM_001145375.1; NM_001205179.1; NM_001205180.1; XM_005253835.5; XM_005253836.1	1 (NM_001001655.2,XM_005253836.1,NM_001205180.1,NM_001145374.2); 1-2 (XM_005253835.5,NM_001205179.1,NM_001145375.1)	324
ALKBH2	ALKBH2_05	ALKBH2	NM_001001655.2; NM_001145374.2; NM_001145375.1; NM_001205179.1; NM_001205180.1; XM_005253835.5; XM_005253836.1	2 (XM_005253835.5,NM_001001655.2,XM_005253836.1,NM_001205179.1,NM_001205180.1,NM_001145375.1,NM_001145374.2)	325
ALKBH3	ALKBH3_01	ALKBH3	NM_139178.4	1 (NM_139178.4)	326
ALKBH3	ALKBH3_02	ALKBH3	NM_139178.4	9-10 (NM_139178.4)	327
ALKBH3	ALKBH3_03	ALKBH3	NM_139178.4	3-5 (NM_139178.4)	328
ALKBH3	ALKBH3_04	ALKBH3	NM_139178.4	10 (NM_139178.4)	329
ALKBH3	ALKBH3_05	ALKBH3	NM_139178.4	10 (NM_139178.4)	330
AMBP	AMBP_01	AMBP	NM_001633.4	1-2 (NM_001633.4)	331
AMBP	AMBP_02	AMBP	NM_001633.4	5 (NM_001633.4)	332
AMBP	AMBP_03	AMBP	NM_001633.4	4 (NM_001633.4)	333
AMBP	AMBP_04	AMBP	NM_001633.4	9 (NM_001633.4)	334
AMBP	AMBP_05	AMBP	NM_001633.4	8 (NM_001633.4)	335
AMER1	AMER1_01	AMER1	NM_152424.4	2 (NM_152424.4)	336
AMER1	AMER1_02	AMER1	NM_152424.4	2 (NM_152424.4)	337
AMER1	AMER1_03	AMER1	NM_152424.4	2 (NM_152424.4)	338
AMER1	AMER1_04	AMER1	NM_152424.4	2 (NM_152424.4)	339
AMER1	AMER1_05	AMER1	NM_152424.4	2 (NM_152424.4)	340
AMH	AMH_01	AMH	NM_000479.5	4 (NM_000479.5)	341
AMH	AMH_02	AMH	NM_000479.5	4 (NM_000479.5)	342
AMH	AMH_03	AMH	NM_000479.5	5 (NM_000479.5)	343
AMH	AMH_04	AMH	NM_000479.5	5 (NM_000479.5)	344
AMH	AMH_05	AMH	NM_000479.5	5 (NM_000479.5)	345
ANGPT1	ANGPT1_01	ANGPT1	NM_001146.5; NM_001199859.3; NM_001314051.1; XR_928319.2	1-2 (NM_001314051.1); 2-3 (NM_001199859.3,NM_001146.5,XR_928319.2)	346
ANGPT1	ANGPT1_02	ANGPT1	NM_001146.5; NM_001199859.3; NM_001314051.1; XR_928319.2	8 (XR_928319.2,NM_001314051.1); 9 (NM_001199859.3,NM_001146.5)	347
ANGPT1	ANGPT1_03	ANGPT1	NM_001146.5; NM_001199859.3; NM_001314051.1; XR_928319.2	3-4 (NM_001314051.1); 4-5 (NM_001199859.3,NM_001146.5,XR_928319.2)	348
ANGPT1	ANGPT1_04	ANGPT1	NM_001146.5; NM_001199859.3; NM_001314051.1; XR_928319.2	8 (XR_928319.2,NM_001314051.1); 9 (NM_001199859.3,NM_001146.5)	349
ANGPT1	ANGPT1_05	ANGPT1	NM_001146.5; NM_001199859.3; NM_001314051.1; XR_928319.2	8 (XR_928319.2,NM_001314051.1); 9 (NM_001199859.3,NM_001146.5)	350
ANGPT2	ANGPT2_01	ANGPT2	NM_001118887.2; NM_001118888.2; NM_001147.3; XM_017013318.1	8 (NM_001118888.2,XM_017013318.1); 9 (NM_001118887.2,NM_001147.3)	351
ANGPT2	ANGPT2_02	ANGPT2	NM_001118887.2; NM_001118888.2; NM_001147.3; XM_017013318.1	4 (NM_001118888.2,XM_017013318.1); 5 (NM_001118887.2,NM_001147.3)	352
ANGPT2	ANGPT2_03	ANGPT2	NM_001118887.2; NM_001118888.2; NM_001147.3; XM_017013318.1	1 (NM_001118888.2,NM_001118887.2,XM_017013318.1,NM_001147.3)	353
ANGPT2	ANGPT2_04	ANGPT2	NM_001118887.2; NM_001118888.2; NM_001147.3; XM_017013318.1	5 (NM_001118888.2,XM_017013318.1); 6 (NM_001118887.2,NM_001147.3)	354
ANGPT2	ANGPT2_05	ANGPT2	NM_001118887.2; NM_001118888.2; NM_001147.3; XM_017013318.1	8 (NM_001118888.2,XM_017013318.1); 9 (NM_001118887.2,NM_001147.3)	355
ANGPTL4	ANGPTL4_01	ANGPTL4	NM_001039667.3; NM_139314.3; NR_104213.2; XM_005272484.3; XM_005272485.3	1-2 (NM_001039667.3,XM_005272485.3,XM_005272484.3,NM_139314.3,NR_104213.2)	356
ANGPTL4	ANGPTL4_02	ANGPTL4	NM_001039667.3; NM_139314.3; NR_104213.2; XM_005272484.3; XM_005272485.3	3 (NR_104213.2); 6 (NM_001039667.3,XM_005272485.3); 7 (XM_005272484.3,NM_139314.3)	357
ANGPTL4	ANGPTL4_03	ANGPTL4	NM_001039667.3; NM_139314.3; NR_104213.2; XM_005272484.3; XM_005272485.3	2 (NM_001039667.3,XM_005272485.3,XM_005272484.3,NM_139314.3,NR_104213.2)	358
ANGPTL4	ANGPTL4_04	ANGPTL4	NM_001039667.3; NM_139314.3; XM_005272484.3; XM_005272485.3	6 (NM_001039667.3,XM_005272485.3); 7 (XM_005272484.3,NM_139314.3)	359
ANGPTL4	ANGPTL4_05	ANGPTL4	NM_001039667.3; NM_139314.3; NR_104213.2; XM_005272484.3; XM_005272485.3	3 (NR_104213.2); 6 (NM_001039667.3,XM_005272485.3); 7 (XM_005272484.3,NM_139314.3)	360
ANKRD28	ANKRD28_01	ANKRD28	NM_001195098.1; NM_001195099.2; NM_001349277.2; NM_001349278.2; NM_001349279.2; NM_001349280.1; NM_001349281.2; NM_001349282.2; NM_001349283.2; NM_015199.4; NR_146111.1; NR_146112.2; XM_011533541.3; XM_011533542.3; XM_011533547.3; XM_017006029.1; XM_024453418.1; XM_024453419.1; XM_024453420.1; XM_024453421.1; XM_024453422.1; XM_024453423.1; XM_024453424.1; XR_001740071.2; XR_002959503.1	5 (NM_001195099.2); 6 (XM_024453423.1,XM_024453422.1,XM_011533542.3,NM_001349280.1,XM_017006029.1,XM_011533547.3,XM_024453421.1,NR_146111.1,XM_024453424.1); 7 (NM_001195098.1,NM_001349277.2,NM_015199.4,NM_001349281.2,NM_001349278.2,NM_001349282.2,NM_001349283.2,NR_146112.2); 8 (NM_001349279.2,XM_024453420.1); 9 (XM_024453418.1,XR_001740071.2,XR_002959503.1,XM_024453419.1,XM_011533541.3)	361
ANKRD28	ANKRD28_02	ANKRD28	NM_001195098.1; NM_001195099.2; NM_001349277.2; NM_001349278.2; NM_001349279.2; NM_001349280.1; NM_001349281.2; NM_001349282.2; NM_001349283.2; NM_015199.4; XM_011533542.3; XM_011533547.3; XM_017006029.1; XM_024453418.1; XM_024453419.1; XM_024453420.1; XM_024453421.1; XM_024453422.1; XM_024453423.1; XM_024453424.1; XR_001740071.2	26 (NM_001195099.2); 27 (XM_024453423.1,XM_024453422.1,XM_011533542.3,NM_001349280.1,XM_017006029.1,XM_011533547.3,XM_024453421.1,XM_024453424.1); 28 (NM_001195098.1,NM_001349277.2,NM_015199.4,NM_001349281.2,NM_001349278.2,NM_001349282.2,NM_001349283.2); 29 (NM_001349279.2,XM_024453420.1); 30 (XM_024453418.1,XR_001740071.2,XM_024453419.1)	362
ANKRD28	ANKRD28_03	ANKRD28	NM_001195098.1; NM_001195099.2; NM_001349277.2; NM_001349278.2; NM_001349279.2; NM_001349280.1; NM_001349281.2; NM_001349282.2; NM_001349283.2; NM_015199.4; NR_146111.1; NR_146112.2; XM_011533541.3; XM_011533542.3; XM_011533547.3; XM_017006029.1; XM_024453418.1; XM_024453419.1; XM_024453420.1; XM_024453421.1; XM_024453422.1; XM_024453423.1; XM_024453424.1; XR_001740071.2; XR_002959503.1	18 (NM_001195099.2); 19 (XM_024453423.1,XM_024453422.1,XM_011533542.3,NM_001349280.1,XM_017006029.1,XM_011533547.3,XM_024453421.1,NR_146111.1,XM_024453424.1); 20 (NM_001195098.1,NM_001349277.2,NM_015199.4,NM_001349281.2,NM_001349278.2,NM_001349282.2,NM_001349283.2,NR_146112.2); 21 (NM_001349279.2,XM_024453420.1); 22 (XM_024453418.1,XR_001740071.2,XR_002959503.1,XM_024453419.1,XM_011533541.3)	363
ANKRD28	ANKRD28_04	ANKRD28	NM_001195098.1; NM_001195099.2; NM_001349277.2; NM_001349278.2; NM_001349279.2; NM_001349280.1; NM_001349281.2; NM_001349282.2; NM_001349283.2; NM_015199.4; NR_146111.1; NR_146112.2; XM_011533541.3; XM_011533542.3; XM_011533547.3; XM_017006029.1; XM_024453418.1; XM_024453419.1; XM_024453420.1; XM_024453421.1; XM_024453422.1; XM_024453423.1; XM_024453424.1; XR_001740071.2; XR_002959503.1	20-21 (NM_001195099.2); 21-22 (XM_024453423.1,XM_024453422.1,XM_011533542.3,NM_001349280.1,XM_017006029.1,XM_011533547.3,XM_024453421.1,NR_146111.1,XM_024453424.1); 22-23 (NM_001195098.1,NM_001349277.2,NM_015199.4,NM_001349281.2,NM_001349278.2,NM_001349282.2,NM_001349283.2,NR_146112.2); 23-24 (NM_001349279.2,XM_024453420.1); 24-25 (XM_024453418.1,XR_001740071.2,XR_002959503.1,XM_024453419.1,XM_01…	364
ANKRD28	ANKRD28_05	ANKRD28	NM_001195098.1; NM_001195099.2; NM_001349277.2; NM_001349278.2; NM_001349279.2; NM_001349280.1; NM_001349281.2; NM_001349282.2; NM_001349283.2; NM_015199.4; NR_146111.1; NR_146112.2; XM_011533541.3; XM_011533542.3; XM_011533547.3; XM_017006029.1; XM_024453418.1; XM_024453419.1; XM_024453420.1; XM_024453421.1; XM_024453422.1; XM_024453423.1; XM_024453424.1; XR_001740071.2; XR_002959503.1	22-23 (NM_001195099.2); 23-24 (XM_024453423.1,XM_024453422.1,XM_011533542.3,NM_001349280.1,XM_017006029.1,XM_011533547.3,XM_024453421.1,NR_146111.1,XM_024453424.1); 24-25 (NM_001195098.1,NM_001349277.2,NM_015199.4,NM_001349281.2,NM_001349278.2,NM_001349282.2,NM_001349283.2,NR_146112.2); 25-26 (NM_001349279.2,XM_024453420.1); 26-27 (XM_024453418.1,XR_001740071.2,XR_002959503.1,XM_024453419.1,XM_01…	365
ANLN	ANLN_01	ANLN	NM_001284301.3; NM_001284302.3; NM_018685.5; XM_006715746.2; XM_006715747.4; XM_017012354.2; XM_017012355.2; XM_017012356.2	13 (NM_001284302.3,XM_017012356.2,XM_006715747.4,NM_001284301.3); 14 (NM_018685.5,XM_017012354.2,XM_017012355.2,XM_006715746.2)	366
ANLN	ANLN_02	ANLN	NM_001284301.3; NM_001284302.3; NM_018685.5; XM_006715746.2; XM_006715747.4; XM_017012354.2; XM_017012355.2; XM_017012356.2	23 (NM_001284302.3,XM_017012356.2,NM_001284301.3); 24 (NM_018685.5,XM_017012355.2,XM_006715747.4); 25 (XM_017012354.2,XM_006715746.2)	367
ANLN	ANLN_03	ANLN	NM_001284301.3; NM_001284302.3; NM_018685.5; XM_006715746.2; XM_006715747.4; XM_017012354.2; XM_017012355.2; XM_017012356.2	5 (NM_018685.5,NM_001284302.3,XM_017012356.2,XM_017012354.2,XM_017012355.2,XM_006715747.4,XM_006715746.2,NM_001284301.3)	368
ANLN	ANLN_04	ANLN	NM_001284301.3; NM_001284302.3; NM_018685.5; XM_006715746.2; XM_006715747.4; XM_017012354.2; XM_017012355.2; XM_017012356.2	6-7 (NM_018685.5,NM_001284302.3,XM_017012356.2,XM_017012354.2,XM_017012355.2,XM_006715747.4,XM_006715746.2,NM_001284301.3)	369
ANLN	ANLN_05	ANLN	NM_001284301.3; NM_001284302.3; NM_018685.5; XM_006715746.2; XM_006715747.4; XM_017012354.2; XM_017012355.2; XM_017012356.2	14 (NM_001284302.3,XM_017012356.2,XM_006715747.4,NM_001284301.3); 15 (NM_018685.5,XM_017012354.2,XM_017012355.2,XM_006715746.2)	370
ANP32B	ANP32B_01	ANP32B	NM_006401.3	7 (NM_006401.3)	371
ANP32B	ANP32B_02	ANP32B	NM_006401.3	7 (NM_006401.3)	372
ANP32B	ANP32B_03	ANP32B	NM_006401.3	3 (NM_006401.3)	373
ANP32B	ANP32B_04	ANP32B	NM_006401.3	3-4 (NM_006401.3)	374
ANP32B	ANP32B_05	ANP32B	NM_006401.3	7 (NM_006401.3)	375
ANXA1	ANXA1_01	ANXA1	NM_000700.3; XM_011518609.1; XM_017014657.1	10-11 (XM_017014657.1,NM_000700.3,XM_011518609.1)	376
ANXA1	ANXA1_02	ANXA1	NM_000700.3; XM_011518609.1; XM_017014657.1	3 (XM_017014657.1,NM_000700.3,XM_011518609.1)	377
ANXA1	ANXA1_03	ANXA1	NM_000700.3; XM_011518609.1; XM_017014657.1	5 (XM_017014657.1,NM_000700.3,XM_011518609.1)	378
ANXA1	ANXA1_04	ANXA1	NM_000700.3; XM_011518609.1; XM_017014657.1	7-8 (XM_017014657.1,NM_000700.3,XM_011518609.1)	379
ANXA1	ANXA1_05	ANXA1	NM_000700.3; XM_011518609.1; XM_017014657.1	12 (XM_017014657.1,NM_000700.3,XM_011518609.1)	380
APC	APC_01	APC	NM_000038.6; NM_001127510.3; NM_001127511.3; NM_001354895.2; NM_001354896.2; NM_001354897.2; NM_001354898.2; NM_001354899.2; NM_001354900.2; NM_001354901.2; NM_001354906.2	10 (NM_000038.6,NM_001354895.2,NM_001354898.2,NM_001354896.2); 11 (NM_001127510.3,NM_001354906.2); 8 (NM_001127511.3); 9 (NM_001354899.2,NM_001354901.2,NM_001354897.2,NM_001354900.2)	381
APC	APC_02	APC	NM_000038.6; NM_001127510.3; NM_001127511.3; NM_001354895.2; NM_001354896.2; NM_001354897.2; NM_001354898.2; NM_001354899.2; NM_001354900.2; NM_001354901.2; NM_001354902.2; NM_001354903.2; NM_001354904.2; NM_001354905.2; NM_001354906.2	11 (NM_001127511.3); 12 (NM_001354899.2,NM_001354901.2,NM_001354897.2,NM_001354902.2,NM_001354905.2); 13 (NM_000038.6,NM_001354895.2,NM_001354898.2,NM_001354900.2,NM_001354903.2,NM_001354904.2); 14 (NM_001127510.3,NM_001354906.2,NM_001354896.2)	382
APC	APC_03	APC	NM_000038.6; NM_001127510.3; NM_001127511.3; NM_001354895.2; NM_001354896.2; NM_001354897.2; NM_001354898.2; NM_001354899.2; NM_001354900.2; NM_001354901.2; NM_001354902.2; NM_001354903.2; NM_001354904.2; NM_001354905.2; NM_001354906.2	14 (NM_001127511.3); 15 (NM_001354899.2,NM_001354901.2,NM_001354897.2,NM_001354902.2,NM_001354905.2); 16 (NM_000038.6,NM_001354895.2,NM_001354898.2,NM_001354900.2,NM_001354903.2,NM_001354904.2); 17 (NM_001127510.3,NM_001354906.2,NM_001354896.2)	383
APC	APC_04	APC	NM_000038.6; NM_001127510.3; NM_001127511.3; NM_001354895.2; NM_001354896.2; NM_001354897.2; NM_001354898.2; NM_001354899.2; NM_001354900.2; NM_001354901.2; NM_001354902.2; NM_001354903.2; NM_001354904.2; NM_001354905.2; NM_001354906.2	14 (NM_001127511.3); 15 (NM_001354899.2,NM_001354901.2,NM_001354897.2,NM_001354902.2,NM_001354905.2); 16 (NM_000038.6,NM_001354895.2,NM_001354898.2,NM_001354900.2,NM_001354903.2,NM_001354904.2); 17 (NM_001127510.3,NM_001354906.2,NM_001354896.2)	384
APC	APC_05	APC	NM_000038.6; NM_001127510.3; NM_001127511.3; NM_001354895.2; NM_001354896.2; NM_001354897.2; NM_001354898.2; NM_001354899.2; NM_001354900.2; NM_001354901.2; NM_001354902.2; NM_001354903.2; NM_001354904.2; NM_001354905.2; NM_001354906.2	5 (NM_001354901.2,NM_001354897.2,NM_001127511.3,NM_001354900.2,NM_001354902.2,NM_001354905.2); 6 (NM_001354899.2,NM_000038.6,NM_001354895.2,NM_001354906.2,NM_001354898.2,NM_001354896.2,NM_001354903.2,NM_001354904.2); 7 (NM_001127510.3)	385
APH1B	APH1B_01	APH1B	NM_001145646.1; NM_031301.4; XM_011522105.3; XM_024450085.1; XM_024450086.1	3 (NM_001145646.1,XM_011522105.3,NM_031301.4,XM_024450085.1); 4 (XM_024450086.1)	386
APH1B	APH1B_02	APH1B	NM_001145646.1; NM_031301.4; XM_024450085.1; XM_024450086.1	5 (NM_001145646.1); 6 (NM_031301.4,XM_024450085.1); 7 (XM_024450086.1)	387
APH1B	APH1B_03	APH1B	NM_001145646.1; NM_031301.4; XM_024450085.1; XM_024450086.1	5 (NM_001145646.1); 6 (NM_031301.4,XM_024450085.1); 7 (XM_024450086.1)	388
APH1B	APH1B_04	APH1B	NM_001145646.1; NM_031301.4; XM_024450085.1; XM_024450086.1	5 (NM_001145646.1); 6 (NM_031301.4,XM_024450085.1); 7 (XM_024450086.1)	389
APH1B	APH1B_05	APH1B	NM_001145646.1; NM_031301.4; XM_024450085.1; XM_024450086.1	5 (NM_001145646.1); 6 (NM_031301.4,XM_024450085.1); 7 (XM_024450086.1)	390
API5	API5_01	API5	NM_001142930.2; NM_001142931.2; NM_001243747.2; NM_006595.4; NR_024625.2; XM_006718359.4; XM_017018464.1; XM_017018465.1	11 (NM_001243747.2); 13 (NM_001142931.2); 14 (NM_006595.4,NM_001142930.2,XM_006718359.4); 15 (NR_024625.2,XM_017018464.1,XM_017018465.1)	391
API5	API5_02	API5	NM_001142930.2; NM_001142931.2; NM_001243747.2; NM_006595.4; NR_024625.2; XM_006718359.4; XM_017018464.1; XM_017018465.1	10 (NM_001243747.2); 12 (NM_001142931.2); 13 (NM_006595.4,NM_001142930.2,XM_006718359.4); 14 (NR_024625.2,XM_017018464.1,XM_017018465.1)	392
API5	API5_03	API5	NM_001142930.2; NM_001142931.2; NM_001243747.2; NM_006595.4; NR_024625.2; XM_006718359.4; XM_017018464.1; XM_017018465.1	11 (NM_001243747.2); 13 (NM_001142931.2); 14 (NM_006595.4,NM_001142930.2,XM_006718359.4); 15 (NR_024625.2,XM_017018464.1,XM_017018465.1)	393
API5	API5_04	API5	NM_001142930.2; NM_001142931.2; NM_006595.4; NR_024625.2; XM_006718359.4; XM_017018464.1; XM_017018465.1	6 (NM_001142931.2); 7 (NM_006595.4,NM_001142930.2,XM_006718359.4); 8 (NR_024625.2,XM_017018464.1,XM_017018465.1)	394
API5	API5_05	API5	NM_001142930.2; NM_001142931.2; NM_001243747.2; NM_006595.4; NR_024625.2; XM_006718359.4; XM_017018464.1; XM_017018465.1	10 (NM_001243747.2); 12 (NM_001142931.2); 13 (NM_006595.4,NM_001142930.2,XM_006718359.4); 14 (NR_024625.2,XM_017018464.1,XM_017018465.1)	395
APLNR	APLNR_01	APLNR	NM_005161.4; NR_027991.2	1 (NM_005161.4,NR_027991.2)	396
APLNR	APLNR_02	APLNR	NM_005161.4; NR_027991.2	1 (NM_005161.4,NR_027991.2)	397
APLNR	APLNR_03	APLNR	NM_005161.4; NR_027991.2	1 (NM_005161.4,NR_027991.2)	398
APLNR	APLNR_04	APLNR	NM_005161.4; NR_027991.2	1 (NM_005161.4,NR_027991.2)	399
APLNR	APLNR_05	APLNR	NM_005161.4; NR_027991.2	1 (NM_005161.4,NR_027991.2)	400
APOA1	APOA1_01	APOA1	NM_000039.3; NM_001318017.2; NM_001318018.2; NM_001318021.1	3-4 (NM_000039.3,NM_001318018.2,NM_001318017.2,NM_001318021.1)	401
APOA1	APOA1_02	APOA1	NM_000039.3; NM_001318017.2; NM_001318018.2; NM_001318021.1	4 (NM_000039.3,NM_001318018.2,NM_001318017.2,NM_001318021.1)	402
APOA1	APOA1_03	APOA1	NM_000039.3; NM_001318017.2; NM_001318018.2; NM_001318021.1	4 (NM_000039.3,NM_001318018.2,NM_001318017.2,NM_001318021.1)	403
APOA1	APOA1_04	APOA1	NM_000039.3; NM_001318017.2; NM_001318018.2; NM_001318021.1	4 (NM_000039.3,NM_001318018.2,NM_001318017.2,NM_001318021.1)	404
APOA1	APOA1_05	APOA1	NM_000039.3; NM_001318017.2; NM_001318018.2; NM_001318021.1	4 (NM_000039.3,NM_001318018.2,NM_001318017.2,NM_001318021.1)	405
APOA2	APOA2_01	APOA2	NM_001643.2	2-3 (NM_001643.2)	406
APOA2	APOA2_02	APOA2	NM_001643.2	3-4 (NM_001643.2)	407
APOA2	APOA2_03	APOA2	NM_001643.2	4 (NM_001643.2)	408
APOA2	APOA2_04	APOA2	NM_001643.2	4 (NM_001643.2)	409
APOA2	APOA2_05	APOA2	NM_001643.2	2 (NM_001643.2)	410
APOA4	APOA4_01	APOA4	NM_000482.4	1 (NM_000482.4)	411
APOA4	APOA4_02	APOA4	NM_000482.4	2-3 (NM_000482.4)	412
APOA4	APOA4_03	APOA4	NM_000482.4	3 (NM_000482.4)	413
APOA4	APOA4_04	APOA4	NM_000482.4	3 (NM_000482.4)	414
APOA4	APOA4_05	APOA4	NM_000482.4	3 (NM_000482.4)	415
APOB	APOB_01	APOB	NM_000384.3	25 (NM_000384.3)	416
APOB	APOB_02	APOB	NM_000384.3	15-16 (NM_000384.3)	417
APOB	APOB_03	APOB	NM_000384.3	26 (NM_000384.3)	418
APOB	APOB_04	APOB	NM_000384.3	26 (NM_000384.3)	419
APOB	APOB_05	APOB	NM_000384.3	26 (NM_000384.3)	420
APOC2	APOC2_01	APOC2; APOC4-APOC2	NM_000483.5; NR_037932.1	3 (NM_000483.5)	421
APOC2	APOC2_02	APOC2; APOC4-APOC2	NM_000483.5; NR_037932.1	3 (NM_000483.5)	422
APOC2	APOC2_03	APOC2; APOC4-APOC2	NM_000483.5; NR_037932.1	3 (NM_000483.5)	423
APOC2	APOC2_04	APOC2; APOC4-APOC2	NM_000483.5; NR_037932.1	3-4 (NM_000483.5)	424
APOC2	APOC2_05	APOC2; APOC4-APOC2	NM_000483.5; NR_037932.1	4 (NM_000483.5)	425
APOC3	APOC3_01	APOC3	NM_000040.3	2-3 (NM_000040.3)	426
APOC3	APOC3_02	APOC3	NM_000040.3	3 (NM_000040.3)	427
APOC3	APOC3_03	APOC3	NM_000040.3	4 (NM_000040.3)	428
APOC3	APOC3_04	APOC3	NM_000040.3	4 (NM_000040.3)	429
APOC3	APOC3_05	APOC3	NM_000040.3	4 (NM_000040.3)	430
APOE	APOE_01	APOE	NM_001302690.1	1 (NM_001302690.1)	431
APOE	APOE_02	APOE	NM_001302690.1	1 (NM_001302690.1)	432
APOE	APOE_03	APOE	NM_001302690.1	1 (NM_001302690.1)	433
APOL6	APOL6_01	APOL6	NM_030641.4; XM_011530392.3	3 (NM_030641.4); 4 (XM_011530392.3)	434
APOL6	APOL6_02	APOL6	NM_030641.4; XM_011530392.3	3 (NM_030641.4); 4 (XM_011530392.3)	435
APOL6	APOL6_03	APOL6	NM_030641.4; XM_011530392.3	3 (NM_030641.4); 4 (XM_011530392.3)	436
APOL6	APOL6_04	APOL6	NM_030641.4; XM_011530392.3	3 (NM_030641.4); 4 (XM_011530392.3)	437
APOL6	APOL6_05	APOL6	NM_030641.4; XM_011530392.3	3 (NM_030641.4); 4 (XM_011530392.3)	438
APOM	APOM_01	APOM	NM_001256169.2; NM_019101.3; NR_045828.2; XM_006715150.3	2 (NM_001256169.2,NM_019101.3,XM_006715150.3,NR_045828.2)	439
APOM	APOM_02	APOM	NM_001256169.2; NM_019101.3; NR_045828.2; XM_006715150.3	2 (NM_001256169.2,NM_019101.3,XM_006715150.3,NR_045828.2)	440
APOM	APOM_03	APOM	NM_001256169.2; NM_019101.3; NR_045828.2; XM_006715150.3	4 (NM_001256169.2,NM_019101.3,XM_006715150.3,NR_045828.2)	441
APOM	APOM_04	APOM	NM_001256169.2; NM_019101.3; NR_045828.2; XM_006715150.3	4-5 (NM_001256169.2,NM_019101.3,XM_006715150.3,NR_045828.2)	442
APOM	APOM_05	APOM	NM_001256169.2; NM_019101.3; NR_045828.2; XM_006715150.3	5-6 (NM_001256169.2,NM_019101.3,XM_006715150.3,NR_045828.2)	443
APP	APP_01	APP	NM_000484.4; NM_001136016.3; NM_001136131.2; NM_001204301.2; NM_001204302.2; NM_001204303.2; NM_201413.3; NM_201414.3; XM_024452075.1	2 (NM_001204302.2,XM_024452075.1,NM_201413.3,NM_001204301.2,NM_001204303.2,NM_001136131.2,NM_201414.3,NM_000484.4,NM_001136016.3)	444
APP	APP_02	APP	NM_000484.4; NM_001136016.3; NM_001136129.3; NM_001136130.3; NM_001136131.2; NM_001204301.2; NM_001204302.2; NM_001204303.2; NM_201413.3; NM_201414.3; XM_024452075.1	10-11 (NM_001204303.2,NM_001136131.2,NM_201414.3); 11-12 (NM_001204302.2,XM_024452075.1,NM_201413.3,NM_001136016.3,NM_001136130.3); 12-13 (NM_001204301.2,NM_000484.4); 9-10 (NM_001136129.3)	445
APP	APP_03	APP	NM_000484.4; NM_001136016.3; NM_001136129.3; NM_001136130.3; NM_001136131.2; NM_001204301.2; NM_001204302.2; NM_001204303.2; NM_201413.3; NM_201414.3; XM_024452075.1	10 (NM_001136129.3); 11 (NM_001204303.2,NM_001136131.2,NM_201414.3); 12 (NM_001204302.2,XM_024452075.1,NM_201413.3,NM_001136016.3,NM_001136130.3); 13 (NM_001204301.2,NM_000484.4)	446
APP	APP_04	APP	NM_000484.4; NM_001136016.3; NM_001136129.3; NM_001136130.3; NM_001136131.2; NM_001204301.2; NM_001204302.2; NM_001204303.2; NM_201413.3; NM_201414.3; XM_024452075.1	3 (NM_001136130.3,NM_001136129.3); 4 (NM_001204302.2,XM_024452075.1,NM_201413.3,NM_001204301.2,NM_001204303.2,NM_001136131.2,NM_201414.3,NM_000484.4,NM_001136016.3)	447
APP	APP_05	APP	NM_000484.4; NM_001136016.3; NM_001136129.3; NM_001136130.3; NM_001136131.2; NM_001204301.2; NM_001204302.2; NM_001204303.2; NM_201413.3; NM_201414.3	11 (NM_001136129.3); 12 (NM_001204303.2,NM_001136131.2,NM_201414.3); 13 (NM_001204302.2,NM_201413.3,NM_001136016.3,NM_001136130.3); 14 (NM_001204301.2,NM_000484.4)	448
AQP9	AQP9_01	AQP9	NM_001320635.2; NM_001320636.1; NM_020980.5	5 (NM_001320635.2); 6 (NM_001320636.1,NM_020980.5)	449
AQP9	AQP9_02	AQP9	NM_001320635.2; NM_001320636.1; NM_020980.5	5 (NM_001320635.2); 6 (NM_001320636.1,NM_020980.5)	450
AQP9	AQP9_03	AQP9	NM_001320635.2; NM_001320636.1; NM_020980.5	3-4 (NM_001320635.2,NM_001320636.1,NM_020980.5)	451
AQP9	AQP9_04	AQP9	NM_001320635.2; NM_020980.5	1 (NM_001320635.2,NM_020980.5)	452
AQP9	AQP9_05	AQP9	NM_001320635.2; NM_001320636.1; NM_020980.5	2-3 (NM_001320635.2,NM_001320636.1,NM_020980.5)	453
AR	AR_01	AR	NM_000044.6; NM_001011645.3; NM_001348061.1; NM_001348063.1; NM_001348064.1	1 (NM_000044.6,NM_001011645.3,NM_001348063.1,NM_001348061.1,NM_001348064.1)	454
AR	AR_02	AR	NM_000044.6; NM_001011645.3; NM_001348061.1; NM_001348063.1	2 (NM_000044.6,NM_001348063.1,NM_001348061.1); 3 (NM_001011645.3)	455
AR	AR_03	AR	NM_000044.6; NM_001011645.3; NM_001348061.1; NM_001348063.1; NM_001348064.1	2-3 (NM_001348064.1); 3-4 (NM_000044.6,NM_001348063.1,NM_001348061.1); 4-5 (NM_001011645.3)	456
AR	AR_04	AR	NM_000044.6; NM_001011645.3	4 (NM_000044.6); 5 (NM_001011645.3)	457
AR	AR_05	AR	NM_000044.6; NM_001011645.3	5 (NM_000044.6); 6 (NM_001011645.3)	458
AREG	AREG_01	AREG	NM_001657.4	4-5 (NM_001657.4)	459
AREG	AREG_02	AREG	NM_001657.4	2 (NM_001657.4)	460
AREG	AREG_03	AREG	NM_001657.4	1 (NM_001657.4)	461
AREG	AREG_04	AREG	NM_001657.4	2 (NM_001657.4)	462
AREG	AREG_05	AREG	NM_001657.4	1-2 (NM_001657.4)	463
ARG1	ARG1_01	ARG1	NM_000045.4; NM_001244438.2; NM_001369020.1; NR_160934.1	2 (NR_160934.1); 3 (NM_001244438.2,NM_000045.4,NM_001369020.1)	464
ARG1	ARG1_02	ARG1	NM_000045.4; NM_001244438.2; NM_001369020.1; NR_160934.1	2 (NR_160934.1); 3 (NM_001244438.2,NM_000045.4,NM_001369020.1)	465
ARG1	ARG1_03	ARG1	NM_000045.4; NM_001244438.2; NM_001369020.1; NR_160934.1	4-5 (NM_001369020.1); 5-6 (NR_160934.1); 6-7 (NM_001244438.2,NM_000045.4)	466
ARG1	ARG1_04	ARG1	NM_000045.4; NM_001244438.2; NM_001369020.1; NR_160934.1	6 (NM_001369020.1); 7 (NR_160934.1); 8 (NM_001244438.2,NM_000045.4)	467
ARG1	ARG1_05	ARG1	NM_000045.4; NM_001244438.2; NM_001369020.1; NR_160934.1	6 (NM_001369020.1); 7 (NR_160934.1); 8 (NM_001244438.2,NM_000045.4)	468
ARG2	ARG2_01	ARG2	NM_001172.4	7 (NM_001172.4)	469
ARG2	ARG2_02	ARG2	NM_001172.4	8 (NM_001172.4)	470
ARG2	ARG2_03	ARG2	NM_001172.4	7-8 (NM_001172.4)	471
ARG2	ARG2_04	ARG2	NM_001172.4	8 (NM_001172.4)	472
ARG2	ARG2_05	ARG2	NM_001172.4	8 (NM_001172.4)	473
ARID1A	ARID1A_01	ARID1A	NM_006015.6; NM_139135.4	20 (NM_139135.4,NM_006015.6)	474
ARID1A	ARID1A_02	ARID1A	NM_006015.6; NM_139135.4	20 (NM_139135.4,NM_006015.6)	475
ARID1A	ARID1A_03	ARID1A	NM_006015.6; NM_139135.4	20 (NM_139135.4,NM_006015.6)	476
ARID1A	ARID1A_04	ARID1A	NM_006015.6; NM_139135.4	20 (NM_139135.4,NM_006015.6)	477
ARID1A	ARID1A_05	ARID1A	NM_006015.6; NM_139135.4	20 (NM_139135.4,NM_006015.6)	478
ARID1B	ARID1B_01	ARID1B	NM_001363725.2; NM_001371656.1; NM_001374820.1; NM_001374828.1; NM_017519.3; XM_011535984.2; XM_017011103.2; XM_017011104.1; XM_017011105.2; XM_017011106.2; XM_017011107.2; XR_002956289.1	2-3 (NM_001363725.2); 4-5 (NM_001374828.1,NM_017519.3); 5-6 (NM_001374820.1); 5-7 (XR_002956289.1,XM_017011106.2,XM_017011104.1,XM_017011103.2,XM_011535984.2,XM_017011107.2,XM_017011105.2); 6-7 (NM_001371656.1)	479
ARID1B	ARID1B_02	ARID1B	NM_001371656.1; NM_001374820.1; NM_001374828.1; NM_017519.3; XM_011535984.2; XM_017011103.2; XM_017011104.1; XM_017011105.2; XM_017011106.2; XM_017011107.2; XR_002956289.1	2 (NM_001374820.1,NM_001374828.1,NM_017519.3,XR_002956289.1,XM_017011106.2,XM_017011104.1,XM_017011103.2,XM_011535984.2,XM_017011107.2,XM_017011105.2); 3 (NM_001371656.1)	480
ARID1B	ARID1B_03	ARID1B	NM_001371656.1; NM_001374820.1; NM_001374828.1; NM_017519.3; XM_011535984.2; XM_017011103.2; XM_017011104.1; XM_017011105.2; XM_017011106.2; XM_017011107.2; XR_002956289.1	4-5 (NM_001374828.1,NM_017519.3); 5-6 (NM_001374820.1,XR_002956289.1,XM_017011106.2,XM_017011104.1,XM_017011103.2,XM_011535984.2,XM_017011107.2,XM_017011105.2); 6-7 (NM_001371656.1)	481
ARID1B	ARID1B_04	ARID1B	NM_001371656.1; NM_001374820.1; NM_001374828.1; NM_017519.3; XM_011535984.2; XM_017011103.2; XM_017011104.1; XM_017011105.2; XM_017011106.2; XM_017011107.2; XR_002956289.1	2-3 (NM_001374828.1,NM_017519.3); 3-4 (NM_001374820.1,XR_002956289.1,XM_017011106.2,XM_017011104.1,XM_017011103.2,XM_011535984.2,XM_017011107.2,XM_017011105.2); 4-5 (NM_001371656.1)	482
ARID1B	ARID1B_05	ARID1B	NM_001371656.1; NM_001374820.1; NM_001374828.1; NM_017519.3; XM_011535984.2; XM_017011103.2; XM_017011104.1; XM_017011105.2; XM_017011106.2; XM_017011107.2; XR_002956289.1	2 (NM_001374820.1,NM_001374828.1,NM_017519.3,XR_002956289.1,XM_017011106.2,XM_017011104.1,XM_017011103.2,XM_011535984.2,XM_017011107.2,XM_017011105.2); 3 (NM_001371656.1)	483
ARID2	ARID2_01	ARID2	NM_001347839.1; NM_152641.4; XM_006719272.4; XM_011538025.1; XR_944505.3	11 (XR_944505.3,XM_006719272.4,NM_001347839.1,NM_152641.4); 4 (XM_011538025.1)	484
ARID2	ARID2_02	ARID2	NM_001347839.1; NM_152641.4; XM_006719272.4; XM_011538025.1; XR_944505.3	10-11 (XM_011538025.1); 16-17 (XM_006719272.4,NM_001347839.1,NM_152641.4); 17-18 (XR_944505.3)	485
ARID2	ARID2_03	ARID2	NM_001347839.1; NM_152641.4; XM_006719272.4; XR_944505.3	2 (XR_944505.3,XM_006719272.4,NM_001347839.1,NM_152641.4)	486
ARID2	ARID2_04	ARID2	NM_001347839.1; NM_152641.4; XM_006719272.4; XM_011538025.1; XR_944505.3	11 (XR_944505.3,XM_006719272.4,NM_001347839.1,NM_152641.4); 4 (XM_011538025.1)	487
ARID2	ARID2_05	ARID2	NM_001347839.1; NM_152641.4; XM_006719272.4; XR_944505.3	8 (XR_944505.3,XM_006719272.4,NM_001347839.1,NM_152641.4)	488
ARNT	ARNT_01	ARNT	NM_001197325.2; NM_001286035.2; NM_001286036.2; NM_001350224.2; NM_001350225.2; NM_001350226.2; NM_001668.4; NM_178427.3; XM_005245151.2; XM_005245153.1; XM_005245157.1; XM_011509543.3; XM_011509545.3; XM_011509546.2; XM_011509547.2; XM_017001288.2; XM_017001289.1; XM_017001290.2; XM_017001291.1; XM_017001292.1; XM_017001293.1; XM_017001294.1; XM_017001295.1; XM_017001296.1	5 (XM_011509545.3,XM_017001296.1,XM_011509546.2,NM_001197325.2,NM_178427.3,XM_011509547.2); 6 (XM_005245151.2,XM_017001291.1,XM_017001295.1,XM_017001293.1,NM_001286036.2,NM_001350225.2,XM_005245157.1,XM_017001294.1,XM_005245153.1,XM_017001290.2,NM_001668.4,NM_001350226.2); 7 (XM_017001289.1,NM_001350224.2,XM_017001292.1,XM_011509543.3,XM_017001288.2,NM_001286035.2)	494
ARNT	ARNT_02	ARNT	NM_001197325.2; NM_001286035.2; NM_001286036.2; NM_001350224.2; NM_001350225.2; NM_001350226.2; NM_001668.4; NM_178427.3; XM_005245151.2; XM_005245153.1; XM_005245157.1; XM_011509543.3; XM_011509545.3; XM_011509546.2; XM_011509547.2; XM_017001288.2; XM_017001289.1; XM_017001290.2; XM_017001291.1; XM_017001292.1; XM_017001293.1; XM_017001294.1; XM_017001295.1; XM_017001296.1	20 (XM_017001296.1); 21 (XM_011509545.3,XM_011509546.2,XM_017001295.1,XM_017001293.1,NM_001197325.2,XM_005245157.1,NM_178427.3,XM_017001294.1,XM_011509547.2); 22 (XM_005245151.2,XM_017001291.1,NM_001286036.2,NM_001350225.2,XM_017001292.1,XM_005245153.1,XM_017001290.2,NM_001668.4,NM_001350226.2); 23 (XM_017001289.1,NM_001350224.2,XM_011509543.3,XM_017001288.2,NM_001286035.2)	495
ARNT	ARNT_03	ARNT	NM_001197325.2; NM_001286035.2; NM_001286036.2; NM_001350224.2; NM_001350225.2; NM_001350226.2; NM_001668.4; NM_178427.3; XM_005245151.2; XM_005245153.1; XM_005245157.1; XM_011509545.3; XM_011509546.2; XM_011509547.2; XM_017001289.1; XM_017001290.2; XM_017001291.1; XM_017001292.1; XM_017001293.1; XM_017001294.1; XM_017001295.1; XM_017001296.1	20 (XM_017001296.1); 21 (XM_011509545.3,XM_011509546.2,XM_017001295.1,XM_017001293.1,NM_001197325.2,XM_005245157.1,NM_178427.3,XM_017001294.1,XM_011509547.2); 22 (XM_005245151.2,XM_017001291.1,NM_001286036.2,NM_001350225.2,XM_017001292.1,XM_005245153.1,XM_017001290.2,NM_001668.4,NM_001350226.2); 23 (XM_017001289.1,NM_001350224.2,NM_001286035.2)	496
ARNT	ARNT_04	ARNT	NM_001197325.2; NM_001286035.2; NM_001286036.2; NM_001350224.2; NM_001350225.2; NM_001350226.2; NM_001668.4; NM_178427.3; XM_005245151.2; XM_005245153.1; XM_005245157.1; XM_011509543.3; XM_011509545.3; XM_011509546.2; XM_011509547.2; XM_017001288.2; XM_017001289.1; XM_017001290.2; XM_017001291.1; XM_017001292.1; XM_017001293.1; XM_017001294.1; XM_017001295.1; XM_017001296.1	20 (XM_017001296.1); 21 (XM_011509545.3,XM_011509546.2,XM_017001295.1,XM_017001293.1,NM_001197325.2,XM_005245157.1,NM_178427.3,XM_017001294.1,XM_011509547.2); 22 (XM_005245151.2,XM_017001291.1,NM_001286036.2,NM_001350225.2,XM_017001292.1,XM_005245153.1,XM_017001290.2,NM_001668.4,NM_001350226.2); 23 (XM_017001289.1,NM_001350224.2,XM_011509543.3,XM_017001288.2,NM_001286035.2)	497
ARNT	ARNT_05	ARNT	NM_001197325.2; NM_001286035.2; NM_001286036.2; NM_001350224.2; NM_001350225.2; NM_001350226.2; NM_001668.4; NM_178427.3; XM_005245151.2; XM_005245153.1; XM_005245157.1; XM_011509543.3; XM_011509545.3; XM_011509546.2; XM_011509547.2; XM_017001288.2; XM_017001289.1; XM_017001290.2; XM_017001291.1; XM_017001292.1; XM_017001293.1; XM_017001294.1; XM_017001295.1; XM_017001296.1	11 (XM_011509545.3,XM_017001296.1,XM_011509546.2,NM_001197325.2,NM_178427.3,XM_011509547.2); 12 (XM_005245151.2,XM_017001291.1,XM_017001295.1,XM_017001293.1,NM_001286036.2,NM_001350225.2,XM_005245157.1,XM_017001294.1,XM_005245153.1,XM_017001290.2,NM_001668.4,NM_001350226.2); 13 (XM_017001289.1,NM_001350224.2,XM_017001292.1,XM_011509543.3,XM_017001288.2,NM_001286035.2)	498
ARNT2	ARNT2_01	ARNT2	NM_014862.4	19 (NM_014862.4)	499
ARNT2	ARNT2_02	ARNT2	NM_014862.4	19 (NM_014862.4)	500
ARNT2	ARNT2_03	ARNT2	NM_014862.4	12 (NM_014862.4)	501
ARNT2	ARNT2_04	ARNT2	NM_014862.4	19 (NM_014862.4)	502
ARNT2	ARNT2_05	ARNT2	NM_014862.4	10 (NM_014862.4)	503
ASCL1	ASCL1_01	ASCL1	NM_004316.4	1 (NM_004316.4)	504
ASCL1	ASCL1_02	ASCL1	NM_004316.4	2 (NM_004316.4)	505
ASCL1	ASCL1_03	ASCL1	NM_004316.4	1-2 (NM_004316.4)	506
ASCL1	ASCL1_04	ASCL1	NM_004316.4	1 (NM_004316.4)	507
ASCL1	ASCL1_05	ASCL1	NM_004316.4	2 (NM_004316.4)	508
ASL	ASL_01	ASL	NM_000048.4; NM_001024943.2; NM_001024944.2; NM_001024946.2	5-6 (NM_001024946.2,NM_001024943.2,NM_001024944.2); 6-7 (NM_000048.4)	509
ASL	ASL_02	ASL	NM_000048.4; NM_001024943.2; NM_001024944.2; NM_001024946.2	13-14 (NM_001024946.2,NM_001024944.2); 14-15 (NM_001024943.2); 15-16 (NM_000048.4)	510
ASL	ASL_03	ASL	NM_000048.4; NM_001024943.2; NM_001024944.2; NM_001024946.2	1 (NM_001024946.2,NM_001024943.2,NM_001024944.2); 2 (NM_000048.4)	511
ASL	ASL_04	ASL	NM_000048.4; NM_001024943.2; NM_001024944.2; NM_001024946.2	10-11 (NM_000048.4); 8-9 (NM_001024946.2); 9-10 (NM_001024943.2,NM_001024944.2)	512
ASL	ASL_05	ASL	NM_001024943.2; NM_001024944.2; NM_001024946.2	1 (NM_001024946.2,NM_001024943.2,NM_001024944.2)	513
ASNS	ASNS_01	ASNS; CZ1P-ASNS	NM_001178075.2; NM_001178076.2; NM_001178077.1; NM_001352496.2; NM_001673.5; NM_133436.3; NM_183356.3; NR_147989.1	5 (NM_001178077.1,NM_001178076.2); 7 (NM_133436.3,NM_001178075.2,NM_001673.5); 8 (NM_001352496.2,NM_183356.3)	514
ASNS	ASNS_02	ASNS; ASNSP1; CZ1P-ASNS	NM_001178075.2; NM_001178076.2; NM_001178077.1; NM_001352496.2; NM_001673.5; NM_133436.3; NM_183356.3; NR_146077.1; NR_147989.1	6 (NM_001178077.1,NM_001178076.2); 8 (NM_133436.3,NM_001178075.2,NM_001673.5); 9 (NM_001352496.2,NM_183356.3)	515
ASNS	ASNS_03	ASNS; CZ1P-ASNS	NM_001178075.2; NM_001178076.2; NM_001178077.1; NM_001352496.2; NM_001673.5; NM_133436.3; NM_183356.3; NR_147989.1	10 (NM_133436.3,NM_001178075.2,NM_001673.5); 11 (NM_001352496.2,NM_183356.3); 8 (NM_001178077.1,NM_001178076.2)	516
ASNS	ASNS_04	ASNS; CZ1P-ASNS	NM_001178075.2; NM_001178076.2; NM_001178077.1; NM_001352496.2; NM_001673.5; NM_133436.3; NM_183356.3; NR_147989.1	10 (NM_001178077.1,NM_001178076.2); 12 (NM_133436.3,NM_001178075.2,NM_001673.5); 13 (NM_001352496.2,NM_183356.3)	517
ASNS	ASNS_05	ASNS; CZ1P-ASNS	NM_001178075.2; NM_001178076.2; NM_001178077.1; NM_001352496.2; NM_001673.5; NM_133436.3; NM_183356.3; NR_147989.1	11 (NM_001178077.1,NM_001178076.2); 13 (NM_133436.3,NM_001178075.2,NM_001673.5); 14 (NM_001352496.2,NM_183356.3)	518
ASPA	ASPA_01	ASPA	NM_000049.4; NM_001128085.1; XM_017024661.1; XM_024450764.1; XR_934026.2	3-4 (NM_000049.4,XR_934026.2); 4-5 (XM_024450764.1,NM_001128085.1); 5-6 (XM_017024661.1)	519
ASPA	ASPA_02	ASPA	NM_000049.4; NM_001128085.1; XM_017024661.1; XM_024450764.1; XR_934026.2	6 (NM_000049.4); 7 (XR_934026.2,XM_024450764.1,NM_001128085.1); 8 (XM_017024661.1)	520
ASPA	ASPA_03	ASPA	NM_000049.4; NM_001128085.1; XM_017024661.1; XM_024450764.1; XR_934026.2	6 (NM_000049.4); 7 (XR_934026.2,XM_024450764.1,NM_001128085.1); 8 (XM_017024661.1)	521
ASPA	ASPA_04	ASPA	NM_000049.4; NM_001128085.1; XM_017024661.1; XM_024450764.1; XR_934026.2	1 (NM_000049.4,XR_934026.2); 2 (XM_024450764.1,NM_001128085.1); 3 (XM_017024661.1)	522
ASPA	ASPA_05	ASPA	NM_000049.4; NM_001128085.1; XM_017024661.1; XM_024450764.1; XR_934026.2	1 (NM_000049.4,XR_934026.2); 2 (XM_024450764.1,NM_001128085.1); 3 (XM_017024661.1)	523
ASPG	ASPG_01	ASPG	NM_001080464.3; XM_005267590.4; XM_017021265.1; XM_017021266.1; XM_017021267.1; XM_017021268.1; XM_017021269.1; XM_017021270.1; XM_017021271.1; XM_017021272.1; XM_017021273.1; XM_017021274.1; XM_017021275.1; XM_017021276.1; XR_001750304.1	1-2 (XM_017021276.1,XM_017021267.1,XM_017021272.1,XM_017021270.1,XM_017021266.1,XM_017021271.1,XM_017021275.1,XR_001750304.1,XM_017021273.1,XM_017021269.1,XM_017021265.1); 3-4 (XM_017021268.1,XM_017021274.1,XM_005267590.4,NM_001080464.3)	524
ASPG	ASPG_02	ASPG	NM_001080464.3; XM_005267590.4; XM_017021265.1; XM_017021266.1; XM_017021267.1; XM_017021268.1; XM_017021269.1; XM_017021270.1; XM_017021271.1; XM_017021272.1; XM_017021273.1; XM_017021274.1; XM_017021275.1; XM_017021276.1; XR_001750304.1	1 (XM_017021276.1,XM_017021267.1,XM_017021272.1,XM_017021270.1,XM_017021266.1,XM_017021271.1,XM_017021275.1,XR_001750304.1,XM_017021273.1,XM_017021269.1,XM_017021265.1); 3 (XM_017021268.1,XM_017021274.1,XM_005267590.4,NM_001080464.3)	525
ASPG	ASPG_03	ASPG	NM_001080464.3; XM_005267590.4; XM_017021265.1; XM_017021266.1; XM_017021267.1; XM_017021268.1; XM_017021269.1; XM_017021270.1; XM_017021271.1; XM_017021272.1; XM_017021273.1; XM_017021274.1; XM_017021275.1; XM_017021276.1; XR_001750304.1	3-4 (XM_017021276.1,XM_017021267.1,XM_017021272.1,XM_017021270.1,XM_017021266.1,XM_017021271.1,XM_017021275.1,XR_001750304.1,XM_017021273.1,XM_017021269.1,XM_017021265.1); 5-6 (XM_017021268.1,XM_017021274.1,XM_005267590.4,NM_001080464.3)	526
ASPG	ASPG_04	ASPG	NM_001080464.3; XM_005267590.4; XM_017021265.1; XM_017021266.1; XM_017021267.1; XM_017021268.1; XM_017021269.1; XM_017021270.1; XM_017021271.1; XM_017021272.1; XM_017021273.1; XM_017021274.1; XM_017021275.1; XM_017021276.1; XR_001750304.1	4 (XM_017021276.1,XM_017021267.1,XM_017021272.1,XM_017021270.1,XM_017021266.1,XM_017021271.1,XM_017021275.1,XR_001750304.1,XM_017021273.1,XM_017021269.1,XM_017021265.1); 6 (XM_017021268.1,XM_017021274.1,XM_005267590.4,NM_001080464.3)	527
ASPG	ASPG_05	ASPG	NM_001080464.3; XM_005267590.4; XM_017021266.1; XM_017021267.1; XM_017021272.1; XM_017021273.1; XM_017021275.1; XM_017021276.1; XR_001750304.1	13 (XM_017021276.1,XM_017021275.1); 14 (XM_017021272.1,XM_017021273.1); 15 (XM_017021267.1,XM_017021266.1); 16 (XR_001750304.1,XM_005267590.4,NM_001080464.3)	528
ASXL1	ASXL1_01	ASXL1	NM_001164603.1	5 (NM_001164603.1)	529
ATF1	ATF1_01	ATF1	NM_005171.5; XM_011538386.2; XM_011538387.2; XM_011538388.2; XM_017019331.1; XM_017019332.1; XM_017019333.1; XM_017019334.1; XM_017019335.1; XM_017019336.1	2 (XM_011538387.2,NM_005171.5,XM_011538386.2,XM_017019334.1,XM_017019335.1,XM_017019331.1,XM_017019333.1,XM_017019332.1,XM_017019336.1,XM_011538388.2)	530
ATF1	ATF1_02	ATF1	NM_005171.5; XM_011538386.2; XM_011538387.2; XM_011538388.2; XM_017019331.1; XM_017019332.1; XM_017019333.1; XM_017019334.1; XM_017019335.1; XM_017019336.1	6 (XM_011538387.2,NM_005171.5,XM_011538386.2,XM_017019334.1,XM_017019335.1,XM_017019331.1,XM_017019333.1,XM_017019332.1,XM_017019336.1,XM_011538388.2)	531
ATF1	ATF1_03	ATF1	NM_005171.5; XM_011538386.2; XM_011538387.2; XM_011538388.2; XM_017019331.1; XM_017019332.1; XM_017019333.1; XM_017019334.1; XM_017019335.1; XM_017019336.1	7 (XM_011538387.2,NM_005171.5,XM_011538386.2,XM_017019334.1,XM_017019335.1,XM_017019331.1,XM_017019333.1,XM_017019332.1,XM_017019336.1,XM_011538388.2)	532
ATF1	ATF1_04	ATF1	NM_005171.5; XM_011538386.2; XM_011538387.2; XM_011538388.2; XM_017019331.1; XM_017019332.1; XM_017019333.1; XM_017019334.1; XM_017019335.1; XM_017019336.1	5-6 (XM_011538387.2,NM_005171.5,XM_011538386.2,XM_017019334.1,XM_017019335.1,XM_017019331.1,XM_017019333.1,XM_017019332.1,XM_017019336.1,XM_011538388.2)	533
ATF1	ATF1_05	ATF1	NM_005171.5; XM_011538386.2; XM_011538387.2; XM_011538388.2; XM_017019331.1; XM_017019332.1; XM_017019333.1; XM_017019334.1; XM_017019335.1; XM_017019336.1	5 (XM_011538387.2,NM_005171.5,XM_011538386.2,XM_017019334.1,XM_017019335.1,XM_017019331.1,XM_017019333.1,XM_017019332.1,XM_017019336.1,XM_011538388.2)	534
ATF2	ATF2_01	ATF2	NM_001256090.2; NM_001256091.1; NM_001256092.2; NM_001256093.2; NM_001880.4; NR_045768.2; NR_045769.2; NR_045770.2; NR_045771.2; NR_045772.2; NR_045773.2; NR_045774.2	12 (NM_001256092.2,NR_045774.2,NM_001256093.2); 13 (NR_045773.2,NM_001880.4,NM_001256091.1); 14 (NR_045772.2,NM_001256090.2,NR_045771.2,NR_045770.2); 15 (NR_045768.2,NR_045769.2)	535
ATF2	ATF2_02	ATF2	NM_001256090.2; NM_001256091.1; NM_001256092.2; NM_001256093.2; NM_001880.4; NR_045768.2; NR_045769.2; NR_045770.2; NR_045771.2; NR_045772.2; NR_045773.2; NR_045774.2	13 (NM_001256092.2,NR_045774.2,NM_001256093.2); 14 (NR_045773.2,NM_001880.4,NM_001256091.1); 15 (NR_045772.2,NM_001256090.2,NR_045771.2); 16 (NR_045770.2); 17 (NR_045768.2,NR_045769.2)	536
ATF2	ATF2_03	ATF2	NM_001256090.2; NM_001256091.1; NM_001256092.2; NM_001256093.2; NM_001880.4; NR_045768.2; NR_045769.2; NR_045770.2; NR_045771.2; NR_045772.2; NR_045773.2; NR_045774.2	13 (NM_001256092.2,NR_045774.2,NM_001256093.2); 14 (NR_045773.2,NM_001880.4,NM_001256091.1); 15 (NR_045772.2,NM_001256090.2,NR_045771.2); 16 (NR_045770.2); 17 (NR_045768.2,NR_045769.2)	537
ATF2	ATF2_04	ATF2	NM_001256090.2; NM_001256091.1; NM_001256092.2; NM_001256093.2; NM_001256094.1; NM_001880.4; NR_045768.2; NR_045769.2; NR_045770.2; NR_045771.2; NR_045772.2; NR_045773.2; NR_045774.2	1-2 (NR_045768.2,NR_045772.2,NM_001256092.2,NM_001256090.2,NR_045771.2,NR_045773.2,NM_001880.4,NR_045770.2,NR_045774.2,NM_001256093.2,NM_001256091.1,NR_045769.2,NM_001256094.1)	538
ATF2	ATF2_05	ATF2	NM_001256090.2; NM_001256091.1; NM_001256092.2; NM_001256093.2; NM_001880.4; NR_045768.2; NR_045769.2; NR_045770.2; NR_045771.2; NR_045772.2; NR_045773.2; NR_045774.2	10 (NM_001256092.2,NR_045773.2,NR_045774.2,NM_001256093.2); 11 (NR_045772.2,NR_045771.2,NM_001880.4,NR_045770.2,NM_001256091.1); 12 (NR_045768.2,NM_001256090.2,NR_045769.2)	539
ATF3	ATF3_01	ATF3	NM_001030287.3; NM_001040619.3; NM_001206484.3; NM_001206486.2; NM_001206488.3; NM_001674.4; XM_005273146.1; XM_011509579.1; XR_001737203.1	4 (NM_001206486.2,NM_001206488.3,NM_001040619.3,XM_005273146.1,NM_001674.4,XM_011509579.1,XR_001737203.1,NM_001030287.3); 5 (NM_001206484.3)	540
ATF3	ATF3_02	ATF3	NM_001030287.3; NM_001040619.3; NM_001206486.2; NM_001206488.3; NM_001674.4; XM_005273146.1; XM_011509579.1; XR_001737203.1	1-2 (NM_001206486.2); 2 (NM_001206488.3,NM_001040619.3,XM_005273146.1,NM_001674.4,XM_011509579.1,XR_001737203.1,NM_001030287.3)	541
ATF3	ATF3_03	ATF3	NM_001030287.3; NM_001040619.3; NM_001206484.3; NM_001206486.2; NM_001206488.3; NM_001674.4; XM_005273146.1; XM_011509579.1; XR_001737203.1	4 (NM_001206486.2,NM_001206488.3,NM_001040619.3,XM_005273146.1,NM_001674.4,XM_011509579.1,XR_001737203.1,NM_001030287.3); 5 (NM_001206484.3)	542
ATF3	ATF3_04	ATF3	NM_001030287.3; NM_001040619.3; NM_001206484.3; NM_001206486.2; NM_001206488.3; NM_001674.4; XM_005273146.1; XM_011509579.1; XR_001737203.1	4 (NM_001206486.2,NM_001206488.3,NM_001040619.3,XM_005273146.1,NM_001674.4,XM_011509579.1,XR_001737203.1,NM_001030287.3); 5 (NM_001206484.3)	543
ATG10	ATG10_01	ATG10	NM_001131028.2; NM_031482.5; XM_005248612.3; XM_011543660.2; XM_011543661.2; XM_017009944.1	6 (XM_011543661.2); 7 (XM_005248612.3,XM_011543660.2); 8 (NM_031482.5,XM_017009944.1); 9 (NM_001131028.2)	544
ATG10	ATG10_02	ATG10	NM_001131028.2; NM_031482.5; XM_005248612.3; XM_011543660.2; XM_011543661.2; XM_017009944.1	6 (XM_011543661.2); 7 (XM_005248612.3,XM_011543660.2); 8 (NM_031482.5,XM_017009944.1); 9 (NM_001131028.2)	545
ATG10	ATG10_03	ATG10	NM_001131028.2; NM_031482.5; XM_005248610.5; XM_005248611.5; XM_005248612.3; XM_011543660.2; XM_011543661.2; XM_017009944.1	1-2 (XM_011543661.2); 2-3 (XM_005248612.3,XM_011543660.2); 3-4 (NM_031482.5,XM_017009944.1,XM_005248610.5,XM_005248611.5); 4-5 (NM_001131028.2)	546
ATG10	ATG10_04	ATG10	NM_001131028.2; NM_031482.5; XM_005248610.5; XM_005248611.5; XM_005248612.3; XM_011543660.2; XM_011543661.2; XM_017009944.1	6 (XM_011543661.2); 7 (XM_005248612.3,XM_011543660.2); 8 (NM_031482.5,XM_017009944.1,XM_005248610.5,XM_005248611.5); 9 (NM_001131028.2)	547
ATG10	ATG10_05	ATG10	NM_001131028.2; NM_031482.5; XM_005248610.5; XM_005248611.5; XM_005248612.3; XM_011543660.2; XM_011543661.2; XM_017009944.1	5 (XM_011543661.2); 6 (XM_005248612.3,XM_011543660.2); 7 (NM_031482.5,XM_017009944.1,XM_005248610.5,XM_005248611.5); 8 (NM_001131028.2)	548
ATG12	ATG12_01	ATG12	NM_001277783.2; NM_004707.4; NR_033362.2; NR_033363.2; NR_073603.2	3 (NM_001277783.2); 4 (NM_004707.4); 5 (NR_033362.2,NR_033363.2); 6 (NR_073603.2)	549
ATG12	ATG12_02	ATG12	NM_001277783.2; NM_004707.4; NR_033362.2; NR_033363.2; NR_073603.2	3 (NM_001277783.2); 4 (NM_004707.4); 5 (NR_033362.2,NR_033363.2); 6 (NR_073603.2)	550
ATG12	ATG12_03	ATG12	NM_001277783.2; NM_004707.4; NR_033362.2; NR_033363.2; NR_073603.2	3 (NM_001277783.2); 4 (NM_004707.4); 5 (NR_033362.2,NR_033363.2); 6 (NR_073603.2)	551
ATG12	ATG12_04	ATG12	NM_001277783.2; NM_004707.4; NR_033362.2; NR_033363.2; NR_073603.2	3 (NM_001277783.2); 4 (NM_004707.4); 5 (NR_033362.2,NR_033363.2); 6 (NR_073603.2)	552
ATG12	ATG12_05	ATG12	NM_001277783.2; NM_004707.4; NR_033362.2; NR_033363.2; NR_073603.2	3 (NM_001277783.2); 4 (NM_004707.4); 5 (NR_033362.2,NR_033363.2); 6 (NR_073603.2)	553
ATG16L1	ATG16L1_01	ATG16L1	NM_001190266.2; NM_001190267.2; NM_001363742.2; NM_017974.4; NM_030803.7; NM_198890.2; XM_005246084.2; XM_005246086.2; XM_006712608.3; XR_001738801.2; XR_241242.3	1-2 (XM_005246084.2,NM_001363742.2,XM_006712608.3,NM_017974.4,XR_241242.3,NM_001190267.2,NM_030803.7,NM_198890.2,XM_005246086.2,XR_001738801.2,NM_001190266.2)	554
ATG16L1	ATG16L1_02	ATG16L1	NM_001190266.2; NM_001190267.2; NM_001363742.2; NM_017974.4; NM_030803.7; NM_198890.2; XM_005246084.2; XM_005246086.2; XM_006712608.3; XR_001738801.2; XR_241242.3	2 (XM_005246084.2,NM_001363742.2,XM_006712608.3,NM_017974.4,XR_241242.3,NM_001190267.2,NM_030803.7,NM_198890.2,XM_005246086.2,XR_001738801.2,NM_001190266.2)	555
ATG16L1	ATG16L1_03	ATG16L1	NM_001190266.2; NM_001190267.2; NM_001363742.2; NM_017974.4; NM_030803.7; NM_198890.2; XM_005246084.2; XM_005246086.2; XM_006712608.3; XR_001738801.2; XR_241242.3	10 (NM_001363742.2,XR_241242.3); 5 (NM_198890.2); 6 (XM_005246086.2); 7 (XM_005246084.2); 8 (NM_017974.4); 9 (XM_006712608.3,NM_001190267.2,NM_030803.7,XR_001738801.2,NM_001190266.2)	556
ATG16L1	ATG16L1_04	ATG16L1	NM_001190266.2; NM_001190267.2; NM_001363742.2; NM_017974.4; NM_030803.7; NM_198890.2; XM_005246084.2; XM_005246086.2; XM_006712608.3; XR_001738801.2; XR_241242.3	10-11 (NM_001363742.2,XR_241242.3); 5-6 (NM_198890.2); 6-7 (XM_005246086.2); 7-8 (XM_005246084.2); 8-9 (NM_017974.4); 9-10 (XM_006712608.3,NM_001190267.2,NM_030803.7,XR_001738801.2,NM_001190266.2)	557
ATG16L1	ATG16L1_05	ATG16L1	NM_001190266.2; NM_001190267.2; NM_001363742.2; NM_017974.4; NM_030803.7; NM_198890.2; XM_005246084.2; XM_005246086.2; XM_006712608.3; XR_001738801.2; XR_241242.3	10 (XM_005246086.2); 11 (XM_005246084.2); 12 (NM_017974.4); 13 (XM_006712608.3,NM_001190267.2,NM_030803.7,XR_001738801.2,NM_001190266.2); 14 (NM_001363742.2,XR_241242.3); 9 (NM_198890.2)	558
ATG5	ATG5_01	ATG5	NM_001286106.1; NM_001286107.1; NM_001286108.1; NM_001286111.1; NM_004849.4; NR_104402.1; NR_104403.1; XM_024446590.1; XR_001743757.2	5 (NM_001286111.1,NR_104403.1); 6 (NR_104402.1); 7 (XM_024446590.1,NM_001286107.1); 8 (NM_004849.4,NM_001286108.1,NM_001286106.1); 9 (XR_001743757.2)	559
ATG5	ATG5_02	ATG5	NM_001286106.1; NM_001286107.1; NM_001286108.1; NM_001286111.1; NM_004849.4; NR_104402.1; NR_104403.1; XM_024446590.1; XR_001743757.2	5 (NM_001286111.1,NR_104403.1); 6 (NR_104402.1); 7 (XM_024446590.1,NM_001286107.1); 8 (NM_004849.4,NM_001286108.1,NM_001286106.1); 9 (XR_001743757.2)	560
ATG5	ATG5_03	ATG5	NM_001286106.1; NM_001286107.1; NM_001286108.1; NM_001286111.1; NM_004849.4; NR_104402.1; NR_104403.1; XM_024446590.1; XR_001743757.2	1 (NR_104403.1,NR_104402.1); 2 (NM_001286111.1,NM_004849.4,XR_001743757.2,NM_001286108.1,XM_024446590.1,NM_001286106.1,NM_001286107.1)	561
ATG5	ATG5_04	ATG5	NM_001286106.1; NM_001286107.1; NM_001286108.1; NM_001286111.1; NM_004849.4; NR_104402.1; NR_104403.1; XM_024446590.1; XR_001743757.2	5 (NM_001286111.1,NR_104403.1); 6 (NR_104402.1); 7 (XM_024446590.1,NM_001286107.1); 8 (NM_004849.4,NM_001286108.1,NM_001286106.1); 9 (XR_001743757.2)	562
ATG5	ATG5_05	ATG5	NM_001286106.1; NM_001286107.1; NM_001286108.1; NM_001286111.1; NM_004849.4; NR_104402.1; NR_104403.1; XM_024446590.1; XR_001743757.2	1 (NR_104403.1,NR_104402.1); 2 (NM_001286111.1,NM_004849.4,XR_001743757.2,NM_001286108.1,XM_024446590.1,NM_001286106.1,NM_001286107.1)	563
ATG7	ATG7_01	ATG7	NM_001136031.3; NM_001144912.2; NM_001349232.2; NM_001349233.2; NM_001349234.2; NM_001349235.2; NM_001349236.2; NM_001349237.2; NM_001349238.2; NM_006395.3; XM_006712931.4; XM_006712932.4; XM_006712933.3; XM_011533277.3; XM_011533278.2; XM_011533279.2; XM_011533280.2; XM_011533281.2; XM_011533283.2; XM_011533284.2; XM_011533285.3; XM_011533286.2; XM_017005542.1; XM_017005543.1; XM_017005547.2; XM…	2 (XM_006712933.3,XM_024453312.1,XR_001739980.2,NM_006395.3,XM_017005550.1,XM_017005548.1,XM_017005551.1,XM_024453315.1,NM_001136031.3,XM_017005542.1,XM_006712931.4,XM_024453314.1,XM_017005543.1,NM_001349238.2,NM_001349237.2,NM_001144912.2,NM_001349236.2); 3 (NM_001349233.2,XM_017005549.2,NM_001349234.2,NM_001349235.2,XM_006712932.4,XM_011533278.2); 4 (XM_017005547.2,XM_011533277.3,XR_940363.2,NM…	564
ATG7	ATG7_02	ATG7	NM_001136031.3; NM_001144912.2; NM_001349232.2; NM_001349233.2; NM_001349234.2; NM_001349235.2; NM_001349236.2; NM_001349237.2; NM_001349238.2; NM_006395.3; XM_006712931.4; XM_006712932.4; XM_006712933.3; XM_011533277.3; XM_011533278.2; XM_011533279.2; XM_011533280.2; XM_011533281.2; XM_011533283.2; XM_011533284.2; XM_011533285.3; XM_011533286.2; XM_017005542.1; XM_017005543.1; XM_017005547.2; XM…	10 (XM_017005547.2,XM_011533277.3,XR_940363.2,NM_001349232.2,XM_011533280.2,XM_011533283.2,XM_011533286.2,XM_011533284.2,XM_011533285.3,XM_011533281.2,XM_011533279.2); 6 (XM_024453313.1); 7 (NM_001144912.2,NM_001349236.2); 8 (XM_006712933.3,XM_024453312.1,XR_001739980.2,NM_006395.3,XM_017005550.1,XM_017005548.1,XM_017005551.1,XM_024453315.1,NM_001136031.3,XM_017005542.1,XM_006712931.4,XM_01700554…	565
ATG7	ATG7_03	ATG7	NM_001136031.3; NM_001144912.2; NM_001349232.2; NM_001349233.2; NM_001349234.2; NM_001349235.2; NM_001349236.2; NM_001349237.2; NM_001349238.2; NM_006395.3; XM_006712931.4; XM_006712932.4; XM_006712933.3; XM_011533277.3; XM_011533278.2; XM_011533279.2; XM_011533280.2; XM_011533281.2; XM_011533283.2; XM_011533284.2; XM_011533285.3; XM_011533286.2; XM_017005542.1; XM_017005543.1; XM_017005547.2; XM…	10 (XM_024453315.1,NM_001349238.2,NM_001144912.2,NM_001349236.2); 11 (XM_006712933.3,XM_024453312.1,XR_001739980.2,NM_006395.3,XM_017005550.1,XM_017005548.1,XM_017005551.1,NM_001136031.3,XM_017005542.1,XM_006712931.4,XM_017005543.1,NM_001349237.2); 12 (NM_001349233.2,XM_017005549.2,NM_001349234.2,NM_001349235.2,XM_006712932.4,XM_011533278.2); 13 (XM_017005547.2,XM_011533277.3,XR_940363.2,NM_00134…	566
ATG7	ATG7_04	ATG7	NM_001136031.3; NM_001144912.2; NM_001349232.2; NM_001349233.2; NM_001349234.2; NM_001349235.2; NM_001349236.2; NM_001349237.2; NM_001349238.2; NM_006395.3; XM_006712931.4; XM_006712932.4; XM_006712933.3; XM_011533277.3; XM_011533278.2; XM_011533279.2; XM_011533280.2; XM_011533281.2; XM_011533283.2; XM_011533284.2; XM_011533285.3; XM_011533286.2; XM_017005542.1; XM_017005543.1; XM_017005547.2; XM…	5 (XM_024453313.1); 6 (NM_001144912.2,NM_001349236.2); 7 (XM_006712933.3,XM_024453312.1,XR_001739980.2,NM_006395.3,XM_017005550.1,XM_017005548.1,XM_017005551.1,XM_024453315.1,NM_001136031.3,XM_017005542.1,XM_006712931.4,XM_024453314.1,XM_017005543.1,NM_001349238.2,NM_001349237.2); 8 (NM_001349233.2,XM_017005549.2,NM_001349234.2,NM_001349235.2,XM_006712932.4,XM_011533278.2); 9 (XM_017005547.2,XM_0…	567
ATG7	ATG7_05	ATG7	NM_001136031.3; NM_001144912.2; NM_001349232.2; NM_001349233.2; NM_001349234.2; NM_001349235.2; NM_001349236.2; NM_001349237.2; NM_001349238.2; NM_006395.3; XM_006712931.4; XM_006712932.4; XM_006712933.3; XM_011533277.3; XM_011533278.2; XM_011533279.2; XM_011533280.2; XM_011533281.2; XM_011533283.2; XM_011533284.2; XM_011533285.3; XM_011533286.2; XM_017005542.1; XM_017005543.1; XM_017005547.2; XM…	11 (XM_024453313.1); 12 (XM_024453314.1); 13 (XM_017005550.1,XM_024453315.1,NM_001349238.2,NM_001349237.2,NM_001144912.2,NM_001349236.2); 14 (XM_006712933.3,XM_024453312.1,XM_017005549.2,XR_001739980.2,NM_006395.3,XM_017005548.1,XM_017005551.1,NM_001136031.3,XM_017005542.1,XM_006712931.4,XM_017005543.1); 15 (NM_001349233.2,NM_001349234.2,NM_001349235.2,XM_006712932.4,XM_011533285.3,XM_011533278.2…	568
ATM	ATM_01	ATM	NM_000051.4; NM_001351834.2; XM_005271562.5; XM_006718843.4; XM_006718845.2; XM_011542840.3; XM_011542842.3; XM_011542843.2; XM_011542844.3; XM_011542845.2; XM_017017789.2; XM_017017790.2; XM_017017791.1; XM_017017792.2; XR_002957150.1	26 (XM_011542845.2); 33 (XM_011542842.3,XR_002957150.1); 34 (NM_000051.4,XM_017017791.1,XM_011542843.2,XM_017017790.2,XM_011542844.3,XM_005271562.5,XM_006718843.4,XM_017017792.2); 35 (NM_001351834.2,XM_017017789.2,XM_011542840.3); 9 (XM_006718845.2)	569
ATM	ATM_02	ATM	NM_000051.4; NM_001351834.2; XM_005271562.5; XM_006718843.4; XM_006718845.2; XM_011542840.3; XM_011542842.3; XM_011542843.2; XM_011542844.3; XM_011542845.2; XM_017017789.2; XM_017017790.2; XM_017017791.1; XR_002957150.1	12 (XM_006718845.2); 29 (XM_011542845.2); 36 (XM_011542842.3,XR_002957150.1); 37 (NM_000051.4,XM_017017791.1,XM_011542843.2,XM_017017790.2,XM_011542844.3,XM_005271562.5,XM_006718843.4); 38 (NM_001351834.2,XM_017017789.2,XM_011542840.3)	570
ATM	ATM_03	ATM	NM_000051.4; NM_001351834.2; XM_005271562.5; XM_006718843.4; XM_011542840.3; XM_011542842.3; XM_011542843.2; XM_011542844.3; XM_011542845.2; XM_017017789.2; XM_017017790.2; XM_017017791.1; XM_017017792.2; XR_002957150.1	12 (XM_011542842.3); 13 (NM_000051.4,XM_017017791.1,XM_011542843.2,XM_017017790.2,XM_011542844.3,XM_005271562.5,XR_002957150.1,XM_006718843.4,XM_017017792.2); 14 (NM_001351834.2,XM_017017789.2,XM_011542840.3); 5 (XM_011542845.2)	571
ATM	ATM_04	ATM	NM_000051.4; NM_001351834.2; NM_001351835.1; NM_001351836.1; XM_005271562.5; XM_006718843.4; XM_011542840.3; XM_011542842.3; XM_011542843.2; XM_011542844.3; XM_017017789.2; XM_017017790.2; XM_017017791.1; XM_017017792.2; XR_002957150.1	4 (NM_000051.4,XM_017017791.1,XM_011542843.2,XM_011542842.3,XM_017017790.2,XM_011542844.3,XM_005271562.5,XR_002957150.1,XM_006718843.4,XM_017017792.2,NM_001351835.1,NM_001351836.1); 5 (NM_001351834.2,XM_017017789.2,XM_011542840.3)	572
ATM	ATM_05	ATM	NM_000051.4; NM_001351834.2; XM_005271562.5; XM_006718843.4; XM_006718845.2; XM_011542840.3; XM_011542842.3; XM_011542844.3; XM_011542845.2; XM_017017789.2; XM_017017790.2	35-36 (XM_006718845.2); 52-53 (XM_011542845.2); 59-60 (XM_011542842.3); 60-61 (NM_000051.4,XM_017017790.2,XM_011542844.3,XM_005271562.5,XM_006718843.4); 61-62 (NM_001351834.2,XM_017017789.2,XM_011542840.3)	573
ATOX1	ATOX1_01	ATOX1	NM_004045.4	2-3 (NM_004045.4)	574
ATOX1	ATOX1_02	ATOX1	NM_004045.4	3 (NM_004045.4)	575
ATOX1	ATOX1_03	ATOX1	NM_004045.4	3 (NM_004045.4)	576
ATOX1	ATOX1_04	ATOX1	NM_004045.4	4 (NM_004045.4)	577
ATOX1	ATOX1_05	ATOX1	NM_004045.4	4 (NM_004045.4)	578
ATP11C	ATP11C_01	ATP11C	NM_001010986.3; NM_001353810.2; NM_001353811.2; NM_001353812.2; NM_173694.5; XM_017029439.2; XM_017029440.2; XM_017029441.1; XM_017029442.1; XM_017029443.2; XM_017029445.2; XM_017029446.2; XM_017029448.1; XM_017029449.1; XR_001755683.2; XR_001755684.2; XR_001755685.1; XR_002958774.1	24 (XM_017029449.1,XR_001755685.1,NM_001353812.2,NM_001010986.3,NM_001353811.2,NM_173694.5,XM_017029446.2,XR_001755684.2); 25 (XM_017029442.1,XM_017029448.1,XM_017029445.2,XR_002958774.1,XM_017029440.2,XR_001755683.2,XM_017029439.2,NM_001353810.2,XM_017029443.2); 26 (XM_017029441.1)	579
ATP11C	ATP11C_02	ATP11C	NM_001010986.3; NM_001353810.2; NM_001353811.2; NM_001353812.2; NM_173694.5; XM_017029439.2; XM_017029440.2; XM_017029441.1; XM_017029442.1; XM_017029443.2; XM_017029445.2; XM_017029446.2; XM_017029448.1; XM_017029449.1; XR_001755683.2; XR_001755684.2; XR_001755685.1; XR_002958774.1	29 (NM_001010986.3); 30 (XM_017029449.1,NM_001353812.2,NM_001353811.2,NM_173694.5,NM_001353810.2,XM_017029446.2,XM_017029443.2); 31 (XR_001755685.1,XM_017029442.1,XM_017029448.1,XM_017029445.2,XR_002958774.1,XM_017029440.2,XM_017029439.2,XR_001755684.2); 32 (XM_017029441.1,XR_001755683.2)	580
ATP11C	ATP11C_03	ATP11C	NM_001010986.3; NM_001353810.2; NM_001353811.2; NM_001353812.2; NM_173694.5; XM_017029439.2; XM_017029440.2; XM_017029441.1; XM_017029442.1; XM_017029443.2; XM_017029445.2; XM_017029446.2; XM_017029448.1; XM_017029449.1; XR_001755683.2; XR_001755684.2; XR_001755685.1; XR_002958774.1	13-14 (XM_017029449.1,XR_001755685.1,NM_001353812.2,NM_001010986.3,NM_001353811.2,NM_173694.5,XR_001755684.2); 14-15 (XM_017029442.1,XM_017029448.1,XM_017029445.2,XR_002958774.1,XM_017029440.2,XR_001755683.2,XM_017029439.2,NM_001353810.2,XM_017029446.2,XM_017029443.2); 15-16 (XM_017029441.1)	581
ATP11C	ATP11C_04	ATP11C	NM_001010986.3; NM_001353810.2; NM_001353811.2; NM_001353812.2; NM_173694.5; XM_017029439.2; XM_017029440.2; XM_017029441.1; XM_017029442.1; XM_017029443.2; XM_017029445.2; XM_017029446.2; XM_017029448.1; XM_017029449.1; XR_001755683.2; XR_001755684.2; XR_001755685.1; XR_002958774.1	7-8 (XM_017029449.1,XR_001755685.1,NM_001353812.2,NM_001010986.3,NM_001353811.2,NM_173694.5,XR_001755684.2); 7-9 (XM_017029442.1,XM_017029448.1,XM_017029445.2,XR_002958774.1,XM_017029440.2,XR_001755683.2,XM_017029439.2,XM_017029446.2,XM_017029443.2); 8-10 (XM_017029441.1); 8-9 (NM_001353810.2)	582
ATP11C	ATP11C_05	ATP11C	NM_001010986.3; NM_001353810.2; NM_001353811.2; NM_001353812.2; NM_173694.5; XM_017029439.2; XM_017029440.2; XM_017029441.1; XM_017029442.1; XM_017029443.2; XM_017029445.2; XM_017029446.2; XM_017029448.1; XM_017029449.1; XR_001755683.2; XR_001755684.2; XR_001755685.1; XR_002958774.1	16-17 (XM_017029449.1,XR_001755685.1,NM_001353812.2,NM_001010986.3,NM_001353811.2,NM_173694.5,XM_017029446.2,XR_001755684.2); 17-18 (XM_017029442.1,XM_017029448.1,XM_017029445.2,XR_002958774.1,XM_017029440.2,XR_001755683.2,XM_017029439.2,NM_001353810.2,XM_017029443.2); 18-19 (XM_017029441.1)	583
ATP2A2	ATP2A2_01	ATP2A2	NM_001681.4; NM_170665.4; XM_005253888.3; XM_011538402.3; XR_002957329.1; XR_243009.3	13 (NM_001681.4,XM_011538402.3,XR_002957329.1,XM_005253888.3,XR_243009.3,NM_170665.4)	584
ATP2A2	ATP2A2_02	ATP2A2	NM_001681.4; NM_170665.4; XM_005253888.3; XM_011538402.3; XR_002957329.1; XR_243009.3	9 (NM_001681.4,XM_011538402.3,XR_002957329.1,XM_005253888.3,XR_243009.3,NM_170665.4)	585
ATP2A2	ATP2A2_03	ATP2A2	NM_001681.4; NM_170665.4; XM_005253888.3; XM_011538402.3; XR_002957329.1; XR_243009.3	11 (NM_001681.4,XM_011538402.3,XR_002957329.1,XM_005253888.3,XR_243009.3,NM_170665.4)	586
ATP2A2	ATP2A2_04	ATP2A2	NM_001681.4; NM_170665.4; XM_005253888.3; XM_011538402.3; XR_002957329.1; XR_243009.3	5-6 (NM_001681.4,XM_011538402.3,XR_002957329.1,XM_005253888.3,XR_243009.3,NM_170665.4)	587
ATP2A2	ATP2A2_05	ATP2A2	NM_001681.4; NM_170665.4; XM_005253888.3; XM_011538402.3; XR_002957329.1; XR_243009.3	20 (NM_001681.4,XM_011538402.3,XR_002957329.1,XM_005253888.3,XR_243009.3,NM_170665.4)	588
ATP5F1D	ATP5F1D_01	ATP5F1D	NM_001001975.2; NM_001687.5	1 (NM_001687.5,NM_001001975.2)	589
ATP5F1D	ATP5F1D_02	ATP5F1D	NM_001001975.2; NM_001687.5	1-2 (NM_001687.5,NM_001001975.2)	590
ATP5F1D	ATP5F1D_03	ATP5F1D	NM_001001975.2; NM_001687.5	2-3 (NM_001687.5,NM_001001975.2)	591
ATP5F1D	ATP5F1D_04	ATP5F1D	NM_001001975.2; NM_001687.5	3 (NM_001687.5,NM_001001975.2)	592
ATP5F1D	ATP5F1D_05	ATP5F1D	NM_001001975.2; NM_001687.5	4 (NM_001687.5); 4-5 (NM_001001975.2)	593
ATP5ME	ATP5ME_01	ATP5ME	NM_007100.4	2 (NM_007100.4)	594
ATP5ME	ATP5ME_02	ATP5ME	NM_007100.4; NR_033743.2	1-2 (NR_033743.2); 2-3 (NM_007100.4)	595
ATP5ME	ATP5ME_03	ATP5ME	NM_007100.4; NR_033743.2	2-3 (NR_033743.2); 3-4 (NM_007100.4)	596
ATP5ME	ATP5ME_04	ATP5ME	NM_007100.4; NR_033743.2	3 (NR_033743.2); 4 (NM_007100.4)	597
ATR	ATR_01	ATR	NM_001184.4; NM_001354579.2; XM_011512924.1; XM_011512925.1; XR_001740179.2; XR_001740180.2; XR_001740181.2; XR_001740182.1; XR_002959543.1; XR_924148.2	26 (XM_011512925.1,NM_001354579.2); 27 (XR_001740182.1,XR_924148.2,XR_002959543.1,XR_001740181.2,NM_001184.4,XR_001740180.2,XM_011512924.1,XR_001740179.2)	598
ATR	ATR_02	ATR	NM_001184.4; NM_001354579.2; XM_011512924.1; XM_011512925.1; XR_001740179.2; XR_001740180.2; XR_001740181.2; XR_001740182.1; XR_002959543.1; XR_924148.2	18 (XM_011512925.1,NM_001354579.2); 19 (XR_001740182.1,XR_924148.2,XR_002959543.1,XR_001740181.2,NM_001184.4,XR_001740180.2,XM_011512924.1,XR_001740179.2)	599
ATR	ATR_03	ATR	NM_001184.4; NM_001354579.2; XM_011512924.1; XM_011512925.1; XR_001740179.2; XR_924148.2	44 (XM_011512925.1,NM_001354579.2); 45 (XR_924148.2,NM_001184.4,XM_011512924.1,XR_001740179.2)	600
ATR	ATR_04	ATR	NM_001184.4; NM_001354579.2; XM_011512924.1; XM_011512925.1; XR_001740179.2; XR_001740180.2; XR_001740181.2; XR_001740182.1; XR_002959543.1; XR_924148.2	25-26 (XM_011512925.1,NM_001354579.2); 26-27 (XR_001740182.1,XR_924148.2,XR_002959543.1,XR_001740181.2,NM_001184.4,XR_001740180.2,XM_011512924.1,XR_001740179.2)	601
ATR	ATR_05	ATR	NM_001184.4; NM_001354579.2; XM_011512924.1; XM_011512925.1; XR_001740179.2; XR_001740180.2; XR_001740181.2; XR_001740182.1; XR_002959543.1; XR_924148.2	5 (XR_001740182.1,XR_924148.2,XR_002959543.1,XR_001740181.2,NM_001184.4,XR_001740180.2,XM_011512925.1,XM_011512924.1,NM_001354579.2,XR_001740179.2)	602
ATRX	ATRX_01	ATRX	NM_000489.6; NM_138270.4; XM_005262153.5; XM_005262154.5; XM_005262155.4; XM_005262156.4; XM_005262157.5; XM_006724666.4; XM_006724667.3; XM_006724668.3; XM_017029601.2; XM_017029602.1; XM_017029603.1; XM_017029604.2; XM_017029605.1; XM_017029606.2; XM_017029607.2; XM_017029608.2; XM_017029609.1; XM_017029610.1; XM_017029611.1; XR_001755700.2	6-7 (XM_006724667.3,XM_017029608.2,XM_017029611.1); 7-8 (NM_138270.4,XM_017029606.2,XM_017029604.2,XM_017029610.1,XM_017029607.2,XM_017029609.1,XM_006724666.4,XM_005262156.4,XM_005262157.5,XM_017029603.1); 8-9 (NM_000489.6,XM_005262155.4,XM_005262154.5,XM_017029602.1,XR_001755700.2,XM_017029605.1,XM_017029601.2,XM_006724668.3,XM_005262153.5)	603
ATRX	ATRX_02	ATRX	NM_000489.6; NM_138270.4; XM_005262153.5; XM_005262154.5; XM_005262155.4; XM_005262156.4; XM_005262157.5; XM_006724666.4; XM_006724667.3; XM_006724668.3; XM_017029601.2; XM_017029602.1; XM_017029603.1; XM_017029604.2; XM_017029605.1; XM_017029606.2; XM_017029607.2; XM_017029608.2; XM_017029609.1; XM_017029610.1; XM_017029611.1; XR_001755700.2	1-2 (NM_000489.6,NM_138270.4,XM_006724667.3,XM_005262155.4,XM_017029608.2,XM_017029606.2,XM_017029611.1,XM_005262154.5,XM_017029602.1,XR_001755700.2,XM_017029604.2,XM_017029605.1,XM_017029601.2,XM_017029610.1,XM_017029607.2,XM_017029609.1,XM_006724668.3,XM_006724666.4,XM_005262156.4,XM_005262157.5,XM_005262153.5,XM_017029603.1)	604
ATRX	ATRX_03	ATRX	NM_000489.6; NM_138270.4; XM_005262153.5; XM_005262154.5; XM_005262155.4; XM_005262156.4; XM_005262157.5; XM_006724666.4; XM_006724667.3; XM_006724668.3; XM_017029601.2; XM_017029602.1; XM_017029603.1; XM_017029604.2; XM_017029605.1; XM_017029606.2; XM_017029607.2; XM_017029608.2; XM_017029609.1; XM_017029610.1; XM_017029611.1; XR_001755700.2	10 (XM_005262154.5,XM_017029605.1,XM_017029601.2); 7 (XM_006724667.3,XM_017029608.2); 8 (NM_138270.4,XM_017029606.2,XM_017029611.1,XM_017029607.2,XM_006724666.4,XM_005262156.4,XM_017029603.1); 9 (NM_000489.6,XM_005262155.4,XM_017029602.1,XR_001755700.2,XM_017029604.2,XM_017029610.1,XM_017029609.1,XM_006724668.3,XM_005262157.5,XM_005262153.5)	605
ATRX	ATRX_04	ATRX	NM_000489.6; NM_138270.4; XM_005262153.5; XM_005262154.5; XM_005262155.4; XM_005262156.4; XM_005262157.5; XM_006724666.4; XM_006724667.3; XM_006724668.3; XM_017029601.2; XM_017029602.1; XM_017029603.1; XM_017029604.2; XM_017029605.1; XM_017029606.2; XM_017029607.2; XM_017029608.2; XM_017029609.1; XM_017029610.1; XM_017029611.1; XR_001755700.2	10 (XM_006724667.3,XM_017029608.2); 11 (NM_138270.4,XM_017029606.2,XM_017029611.1,XM_017029607.2,XM_006724666.4,XM_005262156.4,XM_017029603.1); 12 (NM_000489.6,XM_005262155.4,XM_017029602.1,XR_001755700.2,XM_017029604.2,XM_017029610.1,XM_017029609.1,XM_006724668.3,XM_005262157.5,XM_005262153.5); 13 (XM_005262154.5,XM_017029605.1,XM_017029601.2)	606
ATRX	ATRX_05	ATRX	NM_000489.6; NM_138270.4; XM_005262153.5; XM_005262154.5; XM_005262155.4; XM_005262156.4; XM_005262157.5; XM_006724666.4; XM_006724667.3; XM_006724668.3; XM_017029601.2; XM_017029602.1; XM_017029603.1; XM_017029604.2; XM_017029605.1; XM_017029606.2; XM_017029607.2; XM_017029608.2; XM_017029609.1; XM_017029610.1; XM_017029611.1; XR_001755700.2	7 (XM_006724667.3,XM_017029608.2,XM_017029611.1); 8 (NM_138270.4,XM_017029606.2,XM_017029604.2,XM_017029610.1,XM_017029607.2,XM_017029609.1,XM_006724666.4,XM_005262156.4,XM_005262157.5,XM_017029603.1); 9 (NM_000489.6,XM_005262155.4,XM_005262154.5,XM_017029602.1,XR_001755700.2,XM_017029605.1,XM_017029601.2,XM_006724668.3,XM_005262153.5)	607
AURKA	AURKA_01	AURKA	NM_001323303.2; NM_001323304.2; NM_001323305.2; NM_003600.4; NM_198433.3; NM_198434.2; NM_198435.3; NM_198436.3; NM_198437.3; XM_017028034.2; XM_017028035.1; XM_024451974.1	10 (NM_001323304.2,NM_001323303.2,NM_198436.3,NM_198434.2); 11 (NM_198433.3,XM_017028034.2,NM_001323305.2,XM_024451974.1); 9 (NM_003600.4,XM_017028035.1,NM_198437.3,NM_198435.3)	608
AURKA	AURKA_02	AURKA	NM_001323303.2; NM_001323304.2; NM_001323305.2; NM_003600.4; NM_198433.3; NM_198434.2; NM_198435.3; NM_198436.3; NM_198437.3; XM_017028034.2; XM_017028035.1; XM_024451974.1	3 (NM_003600.4,XM_017028035.1,NM_198437.3,NM_198435.3); 4 (NM_001323304.2,NM_001323303.2,NM_198436.3,NM_198434.2); 5 (NM_198433.3,XM_017028034.2,NM_001323305.2,XM_024451974.1)	609
AURKA	AURKA_03	AURKA	NM_001323303.2; NM_001323304.2; NM_001323305.2; NM_003600.4; NM_198433.3; NM_198434.2; NM_198435.3; NM_198436.3; NM_198437.3; XM_017028034.2; XM_017028035.1; XM_024451974.1	3 (NM_003600.4,XM_017028035.1,NM_198437.3,NM_198435.3); 4 (NM_001323304.2,NM_001323303.2,NM_198436.3,NM_198434.2); 5 (NM_198433.3,XM_017028034.2,NM_001323305.2,XM_024451974.1)	610
AURKA	AURKA_04	AURKA	NM_001323303.2; NM_001323304.2; NM_001323305.2; NM_003600.4; NM_198433.3; NM_198434.2; NM_198435.3; NM_198436.3; NM_198437.3; XM_017028034.2; XM_017028035.1; XM_024451974.1	2-3 (NM_003600.4,XM_017028035.1,NM_198437.3,NM_198435.3); 3-4 (NM_001323304.2,NM_001323303.2,NM_198436.3,NM_198434.2); 4-5 (NM_198433.3,XM_017028034.2,NM_001323305.2,XM_024451974.1)	611
AURKA	AURKA_05	AURKA	NM_001323303.2; NM_001323304.2; NM_001323305.2; NM_003600.4; NM_198433.3; NM_198434.2; NM_198435.3; NM_198436.3; NM_198437.3; XM_017028034.2; XM_017028035.1; XM_024451974.1	1-3 (NM_003600.4,XM_017028035.1,NM_198437.3,NM_198435.3); 2-4 (NM_001323304.2,NM_001323303.2,NM_198436.3,NM_198434.2); 3-5 (NM_198433.3,XM_017028034.2,NM_001323305.2,XM_024451974.1)	612
AURKB	AURKB_01	AURKB	NM_001256834.3; NM_001284526.2; NM_001313950.2; NM_001313951.1; NM_001313952.2; NM_001313953.3; NM_001313954.2; NM_001313955.2; NM_004217.4; NR_132730.2; NR_132731.1; XM_011524072.3; XM_017025307.2; XM_017025308.2; XM_017025309.1; XM_017025310.1; XM_017025311.1	1-2 (XM_017025311.1); 4 (NR_132731.1,NM_001313952.2,XM_011524072.3,XM_017025309.1,XM_017025307.2,NM_001256834.3); 4-5 (XM_017025308.2,NM_001313955.2); 5 (NM_001313950.2,NM_001284526.2,NM_001313951.1,NM_004217.4,NM_001313954.2); 5-6 (NM_001313953.3,XM_017025310.1,NR_132730.2)	613
AURKB	AURKB_02	AURKB	NM_001256834.3; NM_001284526.2; NM_001313950.2; NM_001313951.1; NM_001313952.2; NM_001313953.3; NM_001313954.2; NM_001313955.2; NM_004217.4; NR_132730.2; NR_132731.1; XM_011524072.3; XM_017025307.2; XM_017025308.2; XM_017025309.1; XM_017025310.1; XM_017025311.1	5 (XM_017025311.1); 7 (NR_132731.1,NM_001313955.2); 8 (NM_001313952.2,XM_011524072.3,XM_017025309.1,XM_017025307.2,NM_001256834.3,XM_017025308.2); 9 (NM_001313950.2,NM_001284526.2,NM_001313951.1,NM_004217.4,NM_001313954.2,NM_001313953.3,XM_017025310.1,NR_132730.2)	614
AURKB	AURKB_03	AURKB	NM_001256834.3; NM_001284526.2; NM_001313950.2; NM_001313951.1; NM_001313952.2; NM_001313953.3; NM_001313954.2; NM_001313955.2; NM_004217.4; NR_132730.2; NR_132731.1; XM_011524072.3; XM_017025307.2; XM_017025308.2; XM_017025309.1; XM_017025310.1; XM_017025311.1	4-5 (XM_017025311.1); 6-7 (NR_132731.1,NM_001313955.2); 7-8 (NM_001313952.2,XM_011524072.3,XM_017025309.1,XM_017025307.2,NM_001256834.3,XM_017025308.2); 8-9 (NM_001313950.2,NM_001284526.2,NM_001313951.1,NM_004217.4,NM_001313954.2,NM_001313953.3,XM_017025310.1,NR_132730.2)	615
AURKB	AURKB_04	AURKB	NM_001256834.3; NM_001284526.2; NM_001313950.2; NM_001313951.1; NM_001313952.2; NM_001313953.3; NM_001313954.2; NM_004217.4; NR_132730.2; XM_011524072.3; XM_017025307.2; XM_017025308.2; XM_017025309.1; XM_017025310.1; XM_017025311.1	2 (XM_017025311.1); 5 (NM_001313952.2,XM_011524072.3,XM_017025309.1,XM_017025307.2,NM_001256834.3,XM_017025308.2); 6 (NM_001313950.2,NM_001284526.2,NM_001313951.1,NM_004217.4,NM_001313954.2,NM_001313953.3,XM_017025310.1,NR_132730.2)	616
AURKB	AURKB_05	AURKB	NM_001256834.3; NM_001284526.2; NM_001313950.2; NM_001313951.1; NM_001313952.2; NM_001313954.2; NM_004217.4; NR_132731.1; XM_011524072.3; XM_017025307.2; XM_017025309.1	4 (NR_132731.1,NM_001313952.2,XM_011524072.3,XM_017025309.1,XM_017025307.2,NM_001256834.3); 5 (NM_001313950.2,NM_001284526.2,NM_001313951.1,NM_004217.4,NM_001313954.2)	617
AXIN1	AXIN1_01	AXIN1	NM_003502.4; NM_181050.3; NR_134879.2; XM_011522682.2; XM_011522683.2; XM_011522684.2; XM_011522686.1; XM_017023745.2; XM_017023746.1	10 (XM_011522683.2,XM_017023746.1,XM_017023745.2,XM_011522686.1,NM_181050.3); 11 (NM_003502.4,XM_011522684.2,XM_011522682.2); 9 (NR_134879.2)	618
AXIN1	AXIN1_02	AXIN1	NM_003502.4; NM_181050.3; NR_134879.2; XM_011522682.2; XM_011522683.2; XM_011522684.2; XM_017023747.1; XM_017023748.1; XR_001751996.1	2 (NR_134879.2,NM_003502.4,XM_011522683.2,XM_011522684.2,XM_011522682.2,NM_181050.3,XM_017023748.1,XM_017023747.1,XR_001751996.1)	619
AXIN1	AXIN1_03	AXIN1	NM_003502.4; NM_181050.3; NR_134879.2; XM_011522682.2; XM_011522683.2; XM_011522684.2; XM_017023747.1; XM_017023748.1; XR_001751996.1	1-2 (NR_134879.2,NM_003502.4,XM_011522683.2,XM_011522684.2,XM_011522682.2,NM_181050.3,XM_017023748.1,XM_017023747.1,XR_001751996.1)	620
AXIN1	AXIN1_04	AXIN1	NM_003502.4; NM_181050.3; NR_134879.2; XM_011522682.2; XM_011522683.2; XM_011522684.2; XM_017023747.1; XM_017023748.1; XR_001751996.1	2-3 (NR_134879.2,NM_003502.4,XM_011522683.2,XM_011522684.2,XM_011522682.2,NM_181050.3,XM_017023748.1,XM_017023747.1,XR_001751996.1)	621
AXIN1	AXIN1_05	AXIN1	NM_003502.4; NM_181050.3; NR_134879.2; XM_011522682.2; XM_011522683.2; XM_011522684.2; XM_017023747.1; XM_017023748.1; XR_001751996.1	2 (NR_134879.2,NM_003502.4,XM_011522683.2,XM_011522684.2,XM_011522682.2,NM_181050.3,XM_017023748.1,XM_017023747.1,XR_001751996.1)	622
AXIN2	AXIN2_01	AXIN2	NM_001363813.1; NM_004655.4; XM_011525319.2; XM_011525320.1; XM_011525321.2; XM_017025192.1; XM_017025193.1	6-7 (XM_011525319.2,NM_004655.4,XM_017025192.1,XM_011525320.1,XM_011525321.2,NM_001363813.1,XM_017025193.1)	623
AXL	AXL_01	AXL	NM_001278599.1; NM_001699.6; NM_021913.5	14-15 (NM_001278599.1); 16-17 (NM_001699.6); 17-18 (NM_021913.5)	624
AXL	AXL_02	AXL	NM_001278599.1; NM_001699.6; NM_021913.5	17 (NM_001278599.1); 19 (NM_001699.6); 20 (NM_021913.5)	625
AXL	AXL_03	AXL	NM_001278599.1; NM_001699.6; NM_021913.5	15 (NM_001278599.1); 17 (NM_001699.6); 18 (NM_021913.5)	626
AXL	AXL_04	AXL	NM_001278599.1; NM_001699.6; NM_021913.5	11 (NM_001699.6); 12 (NM_021913.5); 9 (NM_001278599.1)	627
AXL	AXL_05	AXL	NM_001278599.1; NM_001699.6; NM_021913.5	17 (NM_001278599.1); 19 (NM_001699.6); 20 (NM_021913.5)	628
B2M	B2M_01	B2M	NM_004048.4; XM_005254549.3; XR_002957658.1	1-2 (XM_005254549.3,XR_002957658.1)	629
B2M	B2M_02	B2M	NM_004048.4; XM_005254549.3; XR_002957658.1	1 (XM_005254549.3,XR_002957658.1)	630
B2M	B2M_03	B2M	NM_004048.4; XM_005254549.3; XR_002957658.1	2 (XM_005254549.3,XR_002957658.1)	631
B2M	B2M_04	B2M	NM_004048.4; XM_005254549.3; XR_002957658.1	2 (XM_005254549.3,XR_002957658.1)	632
B2M	B2M_05	B2M	NM_004048.4; XM_005254549.3; XR_002957658.1	2 (XM_005254549.3); 3 (XR_002957658.1)	633
BAD	BAD_01	BAD	NM_004322.3; NM_032989.3	2 (NM_004322.3); 3 (NM_032989.3)	634
BAD	BAD_02	BAD	NM_004322.3; NM_032989.3	3 (NM_004322.3); 4 (NM_032989.3)	635
BAD	BAD_03	BAD	NM_004322.3; NM_032989.3	3 (NM_004322.3); 4 (NM_032989.3)	636
BAD	BAD_04	BAD	NM_004322.3; NM_032989.3	3 (NM_004322.3); 4 (NM_032989.3)	637
BAD	BAD_05	BAD	NM_004322.3; NM_032989.3	2-3 (NM_004322.3); 3-4 (NM_032989.3)	638
BAG1	BAG1_01	BAG1	NM_001172415.2; NM_001349286.2; NM_001349299.2; NM_004323.6	7 (NM_001349299.2,NM_001172415.2,NM_001349286.2,NM_004323.6)	639
BAG1	BAG1_02	BAG1	NM_001172415.2; NM_001349286.2; NM_001349299.2; NM_004323.6	7 (NM_001349299.2,NM_001172415.2,NM_001349286.2,NM_004323.6)	640
BAG1	BAG1_03	BAG1	NM_001172415.2; NM_001349286.2; NM_001349299.2; NM_004323.6	7 (NM_001349299.2,NM_001172415.2,NM_001349286.2,NM_004323.6)	641
BAG1	BAG1_04	BAG1	NM_001172415.2; NM_001349286.2; NM_001349299.2; NM_004323.6	7 (NM_001349299.2,NM_001172415.2,NM_001349286.2,NM_004323.6)	642
BAG1	BAG1_05	BAG1	NM_001172415.2; NM_001349286.2; NM_001349299.2; NM_004323.6	7 (NM_001349299.2,NM_001172415.2,NM_001349286.2,NM_004323.6)	643
BAGE	BAGE_01	BAGE; BAGE2; BAGE3	NM_001187.1; NM_182481.1; NM_182482.2		644
BAGE	BAGE_02	BAGE	NM_001187.1		645
BAGE	BAGE_03	BAGE	NM_001187.1		646
BAGE	BAGE_04	BAGE	NM_001187.1		647
BAGE	BAGE_05	BAGE	NM_001187.1		648
BAIAP3	BAIAP3_01	BAIAP3	NM_001199096.1; NM_001199097.2; NM_001199098.2; NM_001199099.2; NM_001286464.2; NM_003933.4; XM_011522728.1; XM_011522729.1; XM_011522730.2	10 (NM_001286464.2,NM_001199096.1,XM_011522729.1,NM_001199098.2,NM_001199097.2,XM_011522728.1,XM_011522730.2,NM_003933.4,NM_001199099.2)	649
BAIAP3	BAIAP3_02	BAIAP3	NM_001199096.1; NM_001199097.2; NM_001199098.2; NM_001199099.2; NM_001286464.2; NM_003933.4; XM_011522728.1; XM_011522729.1; XM_011522730.2	31 (NM_001199096.1); 32 (NM_001286464.2,XM_011522729.1,NM_001199098.2,NM_001199097.2,XM_011522728.1,XM_011522730.2,NM_003933.4,NM_001199099.2)	650
BAIAP3	BAIAP3_03	BAIAP3	NM_001199096.1; NM_001199097.2; NM_001199098.2; NM_001199099.2; NM_001286464.2; NM_003933.4; XM_011522728.1; XM_011522729.1; XM_011522730.2	24-25 (NM_001199096.1); 25-26 (NM_001286464.2,XM_011522729.1,NM_001199098.2,NM_001199097.2,XM_011522728.1,XM_011522730.2,NM_003933.4,NM_001199099.2)	651
BAIAP3	BAIAP3_04	BAIAP3	NM_001199096.1; NM_001199097.2; NM_001199098.2; NM_001199099.2; NM_001286464.2; NM_003933.4; XM_011522728.1; XM_011522729.1; XM_011522730.2	27 (NM_001199096.1); 28 (NM_001286464.2,XM_011522729.1,NM_001199098.2,NM_001199097.2,XM_011522728.1,XM_011522730.2,NM_003933.4,NM_001199099.2)	652
BAIAP3	BAIAP3_05	BAIAP3	NM_001199096.1; NM_001199097.2; NM_001199098.2; NM_001199099.2; NM_001286464.2; NM_003933.4; XM_011522728.1; XM_011522729.1; XM_011522730.2	10-11 (NM_001286464.2,NM_001199096.1,XM_011522729.1,NM_001199098.2,NM_001199097.2,XM_011522728.1,XM_011522730.2,NM_003933.4,NM_001199099.2)	653
BAMBI	BAMBI_01	BAMBI	NM_012342.3	3 (NM_012342.3)	654
BAMBI	BAMBI_02	BAMBI	NM_012342.3	2 (NM_012342.3)	655
BAMBI	BAMBI_03	BAMBI	NM_012342.3	2 (NM_012342.3)	656
BAMBI	BAMBI_04	BAMBI	NM_012342.3	3 (NM_012342.3)	657
BAMBI	BAMBI_05	BAMBI	NM_012342.3	3 (NM_012342.3)	658
BAP1	BAP1_01	BAP1	NM_004656.4; XM_011534149.3; XM_011534150.3; XM_011534151.3; XM_011534152.2; XM_017007303.2	13 (XM_011534149.3,XM_011534151.3,XM_017007303.2,XM_011534152.2,XM_011534150.3,NM_004656.4)	659
BAP1	BAP1_02	BAP1	NM_004656.4; XM_011534149.3; XM_011534150.3; XM_011534151.3; XM_011534152.2; XM_017007303.2	9 (XM_011534149.3,XM_011534151.3,XM_017007303.2,XM_011534152.2,XM_011534150.3,NM_004656.4)	660
BAP1	BAP1_03	BAP1	NM_004656.4; XM_011534149.3; XM_011534150.3; XM_011534151.3; XM_011534152.2; XM_017007303.2	4 (XM_011534149.3,XM_011534151.3,XM_017007303.2,XM_011534152.2,XM_011534150.3,NM_004656.4)	661
BAP1	BAP1_04	BAP1	NM_004656.4; XM_011534149.3; XM_011534150.3; XM_011534151.3; XM_011534152.2; XM_017007303.2	3-4 (XM_011534149.3,XM_011534151.3,XM_017007303.2,XM_011534152.2,XM_011534150.3,NM_004656.4)	662
BAP1	BAP1_05	BAP1	NM_004656.4; XM_011534149.3; XM_011534150.3; XM_011534151.3; XM_011534152.2; XM_017007303.2	5-6 (XM_011534149.3,XM_011534151.3,XM_017007303.2,XM_011534152.2,XM_011534150.3,NM_004656.4)	663
BATF	BATF_01	BATF	NM_006399.5	3 (NM_006399.5)	664
BATF	BATF_02	BATF	NM_006399.5	1-2 (NM_006399.5)	665
BATF	BATF_03	BATF	NM_006399.5	2 (NM_006399.5)	666
BATF3	BATF3_01	BATF3	NM_018664.3; XM_017001683.1; XR_001737289.1; XR_921869.2	2 (NM_018664.3,XR_921869.2,XR_001737289.1,XM_017001683.1)	667
BATF3	BATF3_02	BATF3	NM_018664.3; XM_017001683.1; XR_001737289.1; XR_921869.2	2 (NM_018664.3,XR_921869.2,XR_001737289.1,XM_017001683.1)	668
BATF3	BATF3_03	BATF3	NM_018664.3; XR_921869.2	3 (NM_018664.3); 4 (XR_921869.2)	669
BATF3	BATF3_04	BATF3	NM_018664.3; XR_921869.2	3 (NM_018664.3); 4 (XR_921869.2)	670
BATF3	BATF3_05	BATF3	NM_018664.3; XR_921869.2	3 (NM_018664.3); 4 (XR_921869.2)	671
BAX	BAX_01	BAX	NM_001291428.2; NM_001291429.2; NM_001291430.1; NM_001291431.2; NM_004324.4; NM_138761.4; NM_138763.4; NM_138764.5; NR_027882.2; XM_017027077.1	3 (NM_001291431.2,NM_001291430.1); 4 (NM_138763.4,NM_001291429.2); 5 (NM_138764.5,NM_001291428.2,XM_017027077.1,NM_138761.4,NM_004324.4); 6 (NR_027882.2)	672
BAX	BAX_02	BAX	NM_001291428.2; NM_001291429.2; NM_004324.4; NM_138761.4; NM_138764.5; NR_027882.2; XM_017027077.1	2 (NM_001291429.2); 3 (NM_138764.5,NM_001291428.2,XM_017027077.1,NM_138761.4,NM_004324.4,NR_027882.2)	673
BAX	BAX_03	BAX	NM_001291428.2; NM_001291429.2; NM_001291430.1; NM_001291431.2; NM_004324.4; NM_138761.4; NM_138763.4; NM_138764.5; NR_027882.2; XM_017027077.1	2 (NM_001291431.2,NM_001291430.1); 3 (NM_138763.4,NM_001291429.2); 4 (NM_138764.5,NM_001291428.2,XM_017027077.1,NM_138761.4,NM_004324.4,NR_027882.2)	674
BAX	BAX_04	BAX	NM_001291428.2; NM_001291429.2; NM_001291431.2; NM_004324.4; NM_138761.4; NM_138763.4; NM_138764.5; NR_027882.2; XM_017027077.1	4 (NM_001291431.2,NM_001291429.2); 5 (NM_138763.4,NM_004324.4); 5-6 (NM_138764.5); 6 (NM_001291428.2,XM_017027077.1,NM_138761.4); 7 (NR_027882.2)	675
BAX	BAX_05	BAX	NM_001291428.2; NM_001291429.2; NM_001291430.1; NM_001291431.2; NM_004324.4; NM_138761.4; NM_138763.4; NM_138764.5; NR_027882.2; XM_017027077.1	2-3 (NM_001291431.2,NM_001291430.1); 3-4 (NM_138763.4,NM_001291429.2); 4-5 (NM_138764.5,NM_001291428.2,XM_017027077.1,NM_138761.4,NM_004324.4,NR_027882.2)	676
BBC3	BBC3_01	BBC3	NM_001127240.3; NM_001127241.3; NM_001127242.3	1 (NM_001127242.3,NM_001127240.3,NM_001127241.3)	677
BBC3	BBC3_02	BBC3	NM_001127240.3; NM_001127241.3; NM_001127242.3; NM_014417.5; XM_006723141.3; XM_011526722.2	2 (NM_001127242.3); 3 (NM_001127241.3); 4 (NM_001127240.3,XM_011526722.2,NM_014417.5,XM_006723141.3)	678
BBC3	BBC3_03	BBC3	NM_001127240.3; NM_001127241.3; NM_001127242.3; NM_014417.5; XM_006723141.3; XM_011526722.2	2 (NM_001127242.3); 3 (NM_001127241.3); 4 (NM_001127240.3,XM_011526722.2,NM_014417.5,XM_006723141.3)	679
BBC3	BBC3_04	BBC3	NM_001127240.3; NM_001127241.3; NM_001127242.3; NM_014417.5; XM_006723141.3; XM_011526722.2	2 (NM_001127242.3); 3 (NM_001127241.3); 4 (NM_001127240.3,XM_011526722.2,NM_014417.5,XM_006723141.3)	680
BBC3	BBC3_05	BBC3	NM_001127240.3; NM_001127241.3; NM_001127242.3; NM_014417.5; XM_006723141.3; XM_011526722.2	2 (NM_001127242.3); 3 (NM_001127241.3); 4 (NM_001127240.3,XM_011526722.2,NM_014417.5,XM_006723141.3)	681
BBS1	BBS1_01	BBS1	NM_024649.5	17 (NM_024649.5)	682
BBS1	BBS1_02	BBS1	NM_024649.5	7-8 (NM_024649.5)	683
BBS1	BBS1_03	BBS1	NM_024649.5	4 (NM_024649.5)	684
BBS1	BBS1_04	BBS1	NM_024649.5	2 (NM_024649.5)	685
BBS1	BBS1_05	BBS1	NM_024649.5	17 (NM_024649.5)	686
BCAT1	BCAT1_01	BCAT1	NM_001178091.2; NM_001178092.2; NM_001178093.2; NM_001178094.2; NM_005504.7; XM_017019768.2; XR_001748835.2	1-2 (NM_001178091.2,NM_005504.7,XR_001748835.2,NM_001178093.2,XM_017019768.2,NM_001178094.2,NM_001178092.2)	687
BCAT1	BCAT1_02	BCAT1	NM_001178091.2; NM_001178092.2; NM_001178093.2; NM_001178094.2; NM_005504.7; XM_017019768.2; XR_001748835.2	7 (NM_001178092.2); 8 (NM_001178091.2,XM_017019768.2); 9 (NM_005504.7,XR_001748835.2,NM_001178093.2,NM_001178094.2)	688
BCAT1	BCAT1_03	BCAT1	NM_001178091.2; NM_001178092.2; NM_001178093.2; NM_001178094.2; NM_005504.7; XM_017019768.2; XR_001748835.2	3 (NM_001178092.2); 4 (NM_001178091.2,XM_017019768.2); 5 (NM_005504.7,XR_001748835.2,NM_001178093.2,NM_001178094.2)	689
BCAT1	BCAT1_04	BCAT1	NM_001178093.2; NM_001178094.2; NM_005504.7; XR_001748835.2	4-5 (NM_005504.7,XR_001748835.2,NM_001178093.2,NM_001178094.2)	690
BCAT1	BCAT1_05	BCAT1	NM_001178091.2; NM_001178092.2; NM_001178093.2; NM_001178094.2; NM_005504.7; XM_017019768.2; XR_001748835.2	10 (NM_001178091.2,XM_017019768.2); 11 (NM_005504.7,NM_001178093.2,NM_001178094.2); 12 (XR_001748835.2); 9 (NM_001178092.2)	691
BCL10	BCL10_01	BCL10	NM_001320715.2; NM_003921.5; XM_011542397.3; XM_011542398.2; XM_011542399.2	3 (XM_011542397.3,XM_011542399.2,XM_011542398.2,NM_001320715.2,NM_003921.5)	692
BCL10	BCL10_02	BCL10	NM_001320715.2; NM_003921.5; XM_011542397.3; XM_011542398.2; XM_011542399.2	2 (XM_011542397.3,XM_011542399.2,XM_011542398.2,NM_001320715.2,NM_003921.5)	693
BCL10	BCL10_03	BCL10	NM_001320715.2; NM_003921.5; XM_011542397.3; XM_011542398.2; XM_011542399.2	3 (XM_011542397.3,XM_011542399.2,XM_011542398.2,NM_001320715.2,NM_003921.5)	694
BCL10	BCL10_04	BCL10	NM_001320715.2; NM_003921.5; XM_011542397.3; XM_011542398.2; XM_011542399.2	3 (XM_011542397.3,XM_011542399.2,XM_011542398.2,NM_001320715.2,NM_003921.5)	695
BCL10	BCL10_05	BCL10	NM_001320715.2; NM_003921.5; XM_011542397.3; XM_011542398.2; XM_011542399.2	2 (XM_011542397.3,XM_011542399.2,XM_011542398.2,NM_001320715.2,NM_003921.5)	696
BCL2	BCL2_01	BCL2	NM_000633.2; NM_000657.2; XM_011526135.3; XM_017025917.2; XR_935248.3	1 (XM_011526135.3); 2 (XR_935248.3,NM_000633.2,NM_000657.2,XM_017025917.2)	697
BCL2	BCL2_02	BCL2	NM_000633.2; NM_000657.2; XM_011526135.3; XM_017025917.2; XR_935248.3	1 (XM_011526135.3); 2 (XR_935248.3,NM_000633.2,NM_000657.2,XM_017025917.2)	698
BCL2	BCL2_03	BCL2	NM_000633.2; NM_000657.2; XM_011526135.3; XM_017025917.2; XR_935248.3	1 (XM_011526135.3); 2 (XR_935248.3,NM_000633.2,NM_000657.2,XM_017025917.2)	699
BCL2	BCL2_04	BCL2	NM_000633.2; NM_000657.2; XM_011526135.3; XM_017025917.2; XR_935248.3	1 (XM_011526135.3); 2 (XR_935248.3,NM_000633.2,NM_000657.2,XM_017025917.2)	700
BCL2	BCL2_05	BCL2	NM_000633.2	3 (NM_000633.2)	701
BCL2A1	BCL2A1_01	BCL2A1	NM_001114735.2; NM_004049.4	1 (NM_004049.4,NM_001114735.2)	702
BCL2A1	BCL2A1_02	BCL2A1	NM_001114735.2; NM_004049.4	1 (NM_004049.4,NM_001114735.2)	703
BCL2A1	BCL2A1_03	BCL2A1	NM_001114735.2; NM_004049.4	1 (NM_004049.4,NM_001114735.2)	704
BCL2A1	BCL2A1_04	BCL2A1	NM_001114735.2; NM_004049.4	1 (NM_004049.4,NM_001114735.2)	705
BCL2A1	BCL2A1_05	BCL2A1	NM_001114735.2; NM_004049.4	1 (NM_004049.4,NM_001114735.2)	706
BCL2L1	BCL2L1_01	BCL2L1	NM_001191.4; NM_001317919.2; NM_001317920.2; NM_001317921.2; NM_001322239.2; NM_001322240.2; NM_001322242.2; NM_138578.3; NR_134257.1; XM_011528964.2; XM_017027993.1; XR_001754364.2; XR_936599.3	1 (NR_134257.1); 2 (XR_001754364.2,NM_001191.4,XM_017027993.1,NM_001322239.2,NM_001317921.2,NM_001322240.2,XM_011528964.2,XR_936599.3,NM_138578.3,NM_001317920.2,NM_001317919.2,NM_001322242.2)	707
BCL2L1	BCL2L1_02	BCL2L1	NM_001191.4; NM_001317919.2; NM_001317920.2; NM_001317921.2; NM_001322239.2; NM_001322240.2; NM_001322242.2; NM_138578.3; NR_134257.1; XM_011528964.2; XM_017027993.1; XR_001754364.2; XR_936599.3	1 (NR_134257.1); 2 (XR_001754364.2,NM_001191.4,XM_017027993.1,NM_001322239.2,NM_001317921.2,NM_001322240.2,XM_011528964.2,XR_936599.3,NM_138578.3,NM_001317920.2,NM_001317919.2,NM_001322242.2)	708
BCL2L1	BCL2L1_03	BCL2L1	NM_001191.4; NM_001317919.2; NM_001317920.2; NM_001317921.2; NM_001322239.2; NM_001322240.2; NM_001322242.2; NM_138578.3; NR_134257.1; XM_011528964.2; XM_017027993.1; XR_001754364.2; XR_936599.3	1 (NR_134257.1); 2 (XR_001754364.2,NM_001191.4,XM_017027993.1,NM_001322239.2,NM_001317921.2,NM_001322240.2,XM_011528964.2,XR_936599.3,NM_138578.3,NM_001317920.2,NM_001317919.2,NM_001322242.2)	709
BCL2L1	BCL2L1_04	BCL2L1	NM_001191.4; NM_001317919.2; NM_001317920.2; NM_001317921.2; NM_001322239.2; NM_001322240.2; NM_001322242.2; NM_138578.3; NR_134257.1; XM_011528964.2; XM_017027993.1; XR_001754364.2; XR_936599.3	1 (NR_134257.1); 2 (XR_001754364.2,NM_001191.4,XM_017027993.1,NM_001322239.2,NM_001317921.2,NM_001322240.2,XM_011528964.2,XR_936599.3,NM_138578.3,NM_001317920.2,NM_001317919.2,NM_001322242.2)	710
BCL2L1	BCL2L1_05	BCL2L1	NM_001191.4; NM_001317919.2; NM_001317920.2; NM_001317921.2; NM_001322239.2; NM_001322240.2; NM_001322242.2; NM_138578.3; NR_134257.1; XM_011528964.2; XM_017027993.1; XR_001754364.2; XR_936599.3	3 (NM_001191.4,XM_017027993.1,NM_001322239.2,NR_134257.1,NM_001317921.2,NM_001322240.2,XM_011528964.2,NM_138578.3,NM_001317920.2,NM_001317919.2,NM_001322242.2); 4 (XR_001754364.2,XR_936599.3)	711
BCL6	BCL6_01	BCL6	NM_001130845.2; NM_001134738.1; NM_001706.5; XM_005247694.4; XM_011513062.3	10 (NM_001130845.2,NM_001706.5,XM_005247694.4); 8 (NM_001134738.1); 9 (XM_011513062.3)	712
BCL6	BCL6_02	BCL6	NM_001130845.2; NM_001134738.1; NM_001706.5; XM_005247694.4; XM_011513062.3	4 (NM_001134738.1); 5 (XM_011513062.3,NM_001130845.2,NM_001706.5,XM_005247694.4)	713
BCL6	BCL6_03	BCL6	NM_001130845.2; NM_001134738.1; NM_001706.5; XM_005247694.4; XM_011513062.3	6-7 (NM_001134738.1); 7-8 (XM_011513062.3); 8-9 (NM_001130845.2,NM_001706.5,XM_005247694.4)	714
BCL6	BCL6_04	BCL6	NM_001130845.2; NM_001134738.1; NM_001706.5; XM_005247694.4; XM_011513062.3	2 (NM_001134738.1); 3 (XM_011513062.3,NM_001130845.2,NM_001706.5,XM_005247694.4)	715
BCL6	BCL6_05	BCL6	NM_001130845.2; NM_001134738.1; NM_001706.5; XM_005247694.4; XM_011513062.3	10 (NM_001130845.2,NM_001706.5,XM_005247694.4); 8 (NM_001134738.1); 9 (XM_011513062.3)	716
BCL6B	BCL6B_01	BCL6B	NM_181844.4	9 (NM_181844.4)	717
BCL6B	BCL6B_02	BCL6B	NM_181844.4	7 (NM_181844.4)	718
BCL6B	BCL6B_03	BCL6B	NM_181844.4	9 (NM_181844.4)	719
BCL6B	BCL6B_04	BCL6B	NM_181844.4	9 (NM_181844.4)	720
BCL6B	BCL6B_05	BCL6B	NM_181844.4	9 (NM_181844.4)	721
BCOR	BCOR_01	BCOR	NM_001123383.1; NM_001123384.2; NM_001123385.2; NM_017745.6; XM_005272616.1; XM_005272618.3; XM_005272619.4; XM_005272620.4; XM_006724536.3; XM_011543929.2; XM_011543930.1; XM_011543931.2; XM_017029615.1; XM_017029616.2	11 (NM_001123384.2,XM_005272619.4,XM_005272620.4); 12 (XM_006724536.3,NM_001123385.2,XM_017029616.2,NM_001123383.1,XM_011543929.2,XM_005272616.1,XM_011543930.1,XM_005272618.3,NM_017745.6,XM_017029615.1,XM_011543931.2)	722
BCOR	BCOR_02	BCOR	NM_001123383.1; NM_001123384.2; NM_001123385.2; NM_017745.6; XM_005272616.1; XM_005272618.3; XM_005272619.4; XM_005272620.4; XM_006724536.3; XM_011543929.2; XM_011543930.1; XM_011543931.2; XM_017029615.1; XM_017029616.2	4 (NM_001123384.2,XM_006724536.3,NM_001123385.2,XM_017029616.2,NM_001123383.1,XM_011543929.2,XM_005272616.1,XM_005272619.4,XM_011543930.1,XM_005272618.3,NM_017745.6,XM_017029615.1,XM_005272620.4,XM_011543931.2)	723
BCOR	BCOR_03	BCOR	NM_001123383.1; NM_001123384.2; NM_001123385.2; NM_017745.6; XM_005272616.1; XM_005272618.3; XM_005272619.4; XM_005272620.4; XM_006724536.3; XM_011543929.2; XM_011543930.1; XM_011543931.2; XM_017029615.1; XM_017029616.2	2-3 (NM_001123384.2,XM_006724536.3,NM_001123385.2,XM_017029616.2,NM_001123383.1,XM_011543929.2,XM_005272616.1,XM_005272619.4,XM_011543930.1,XM_005272618.3,NM_017745.6,XM_017029615.1,XM_005272620.4,XM_011543931.2)	724
BCOR	BCOR_04	BCOR	NM_001123383.1; NM_001123384.2; NM_001123385.2; NM_017745.6; XM_005272616.1; XM_005272618.3; XM_005272619.4; XM_005272620.4; XM_006724536.3; XM_011543929.2; XM_011543930.1; XM_011543931.2; XM_017029615.1; XM_017029616.2	4 (NM_001123384.2,XM_006724536.3,NM_001123385.2,XM_017029616.2,NM_001123383.1,XM_011543929.2,XM_005272616.1,XM_005272619.4,XM_011543930.1,XM_005272618.3,NM_017745.6,XM_017029615.1,XM_005272620.4,XM_011543931.2)	725
BCOR	BCOR_05	BCOR	NM_001123383.1; NM_001123384.2; NM_001123385.2; NM_017745.6; XM_005272616.1; XM_005272618.3; XM_005272619.4; XM_005272620.4; XM_006724536.3; XM_011543929.2; XM_011543930.1; XM_011543931.2; XM_017029615.1; XM_017029616.2	5-6 (NM_001123384.2,XM_005272619.4,XM_005272620.4); 6-7 (XM_006724536.3,NM_001123385.2,XM_017029616.2,NM_001123383.1,XM_011543929.2,XM_005272616.1,XM_011543930.1,XM_005272618.3,NM_017745.6,XM_017029615.1,XM_011543931.2)	726
BDNF	BDNF_01	BDNF	NM_001143805.1; NM_001143806.1; NM_001143807.2; NM_001143808.1; NM_001143809.1; NM_001143810.1; NM_001143811.1; NM_001143812.1; NM_001143813.2; NM_001143814.2; NM_001143816.1; NM_001709.5; NM_170731.5; NM_170732.4; NM_170733.3; NM_170734.3; NM_170735.5; XM_011520280.2	1 (NM_170735.5); 2 (NM_001143816.1,NM_001143812.1,NM_001143805.1,NM_001143813.2,NM_170734.3,XM_011520280.2,NM_001143809.1,NM_170731.5,NM_001143806.1,NM_001709.5,NM_001143807.2,NM_170732.4,NM_170733.3,NM_001143808.1); 3 (NM_001143810.1,NM_001143814.2); 4 (NM_001143811.1)	727
BDNF	BDNF_02	BDNF	NM_001143805.1; NM_001143806.1; NM_001143807.2; NM_001143808.1; NM_001143809.1; NM_001143810.1; NM_001143811.1; NM_001143812.1; NM_001143813.2; NM_001143814.2; NM_001143816.1; NM_001709.5; NM_170731.5; NM_170732.4; NM_170733.3; NM_170734.3; NM_170735.5; XM_011520280.2	1 (NM_170735.5); 2 (NM_001143816.1,NM_001143812.1,NM_001143805.1,NM_001143813.2,NM_170734.3,XM_011520280.2,NM_001143809.1,NM_170731.5,NM_001143806.1,NM_001709.5,NM_001143807.2,NM_170732.4,NM_170733.3,NM_001143808.1); 3 (NM_001143810.1,NM_001143814.2); 4 (NM_001143811.1)	728
BDNF	BDNF_03	BDNF	NM_001143805.1; NM_001143806.1; NM_001143807.2; NM_001143808.1; NM_001143809.1; NM_001143810.1; NM_001143811.1; NM_001143812.1; NM_001143813.2; NM_001143814.2; NM_001143816.1; NM_001709.5; NM_170731.5; NM_170732.4; NM_170733.3; NM_170734.3; NM_170735.5; XM_011520280.2	1 (NM_170735.5); 2 (NM_001143816.1,NM_001143812.1,NM_001143805.1,NM_001143813.2,NM_170734.3,XM_011520280.2,NM_001143809.1,NM_170731.5,NM_001143806.1,NM_001709.5,NM_001143807.2,NM_170732.4,NM_170733.3,NM_001143808.1); 3 (NM_001143810.1,NM_001143814.2); 4 (NM_001143811.1)	729
BDNF	BDNF_04	BDNF	NM_001143805.1; NM_001143806.1; NM_001143807.2; NM_001143808.1; NM_001143809.1; NM_001143810.1; NM_001143811.1; NM_001143812.1; NM_001143813.2; NM_001143814.2; NM_001143816.1; NM_001709.5; NM_170731.5; NM_170732.4; NM_170733.3; NM_170734.3; NM_170735.5; XM_011520280.2	1 (NM_170735.5); 2 (NM_001143816.1,NM_001143812.1,NM_001143805.1,NM_001143813.2,NM_170734.3,XM_011520280.2,NM_001143809.1,NM_170731.5,NM_001143806.1,NM_001709.5,NM_001143807.2,NM_170732.4,NM_170733.3,NM_001143808.1); 3 (NM_001143810.1,NM_001143814.2); 4 (NM_001143811.1)	730
BDNF	BDNF_05	BDNF	NM_001143805.1; NM_001143806.1; NM_001143807.2; NM_001143808.1; NM_001143809.1; NM_001143810.1; NM_001143811.1; NM_001143812.1; NM_001143813.2; NM_001143814.2; NM_001143816.1; NM_001709.5; NM_170731.5; NM_170732.4; NM_170733.3; NM_170734.3; NM_170735.5; XM_011520280.2	1 (NM_170735.5); 2 (NM_001143816.1,NM_001143812.1,NM_001143805.1,NM_001143813.2,NM_170734.3,XM_011520280.2,NM_001143809.1,NM_170731.5,NM_001143806.1,NM_001709.5,NM_001143807.2,NM_170732.4,NM_170733.3,NM_001143808.1); 3 (NM_001143810.1,NM_001143814.2); 4 (NM_001143811.1)	731
BID	BID_01	BID	NM_001196.4; NM_001244567.1; NM_001244569.1; NM_001244570.1; NM_001244572.1; NM_197966.2; NM_197967.2	4 (NM_001244572.1,NM_001244570.1); 5 (NM_001244569.1,NM_197967.2); 6 (NM_001196.4,NM_197966.2,NM_001244567.1)	732
BID	BID_02	BID	NM_001196.4; NM_001244567.1; NM_001244569.1; NM_001244570.1; NM_001244572.1; NM_197966.2; NM_197967.2	4 (NM_001244572.1,NM_001244570.1); 5 (NM_001244569.1,NM_197967.2); 6 (NM_001196.4,NM_197966.2,NM_001244567.1)	733
BID	BID_03	BID	NM_001196.4; NM_001244567.1; NM_001244569.1; NM_001244570.1; NM_001244572.1; NM_197966.2; NM_197967.2	4 (NM_001244572.1,NM_001244570.1); 5 (NM_001244569.1,NM_197967.2); 6 (NM_001196.4,NM_197966.2,NM_001244567.1)	734
BID	BID_04	BID	NM_001196.4; NM_001244567.1; NM_001244569.1; NM_001244570.1; NM_001244572.1; NM_197966.2; NM_197967.2	4 (NM_001244572.1,NM_001244570.1); 5 (NM_001244569.1,NM_197967.2); 6 (NM_001196.4,NM_197966.2,NM_001244567.1)	735
BID	BID_05	BID	NM_001196.4; NM_001244567.1; NM_001244569.1; NM_001244570.1; NM_001244572.1; NM_197966.2; NM_197967.2	4 (NM_001244572.1,NM_001244570.1); 5 (NM_001244569.1,NM_197967.2); 6 (NM_001196.4,NM_197966.2,NM_001244567.1)	736
BIRC3	BIRC3_01	BIRC3	NM_001165.5; NM_182962.3	2 (NM_001165.5); 3 (NM_182962.3)	737
BIRC3	BIRC3_02	BIRC3	NM_001165.5; NM_182962.3; XM_024448467.1	3 (XM_024448467.1); 4 (NM_001165.5); 5 (NM_182962.3)	738
BIRC3	BIRC3_03	BIRC3	NM_001165.5; NM_182962.3; XM_024448467.1	6 (XM_024448467.1); 7 (NM_001165.5); 8 (NM_182962.3)	739
BIRC3	BIRC3_04	BIRC3	NM_001165.5; NM_182962.3; XM_024448467.1	5 (XM_024448467.1); 6 (NM_001165.5); 7 (NM_182962.3)	740
BIRC3	BIRC3_05	BIRC3	NM_001165.5; NM_182962.3	2 (NM_001165.5); 3 (NM_182962.3)	741
BIRC5	BIRC5_01	BIRC5	NM_001012270.2; NM_001012271.2; NM_001168.3; XR_243654.5; XR_934452.3	3 (NM_001012270.2); 4 (NM_001168.3); 5 (XR_243654.5,NM_001012271.2); 6 (XR_934452.3)	742
BIRC5	BIRC5_02	BIRC5	NM_001012270.2; NM_001012271.2; NM_001168.3; XR_243654.5; XR_934452.3	3 (NM_001012270.2); 4 (NM_001168.3); 5 (XR_243654.5,NM_001012271.2); 6 (XR_934452.3)	743
BIRC5	BIRC5_03	BIRC5	NM_001012270.2; NM_001012271.2; NM_001168.3; XR_243654.5; XR_934452.3	3 (NM_001012270.2); 4 (NM_001168.3); 5 (XR_243654.5,NM_001012271.2); 6 (XR_934452.3)	744
BIRC5	BIRC5_04	BIRC5	NM_001012271.2; NM_001168.3; XR_243654.5; XR_934452.3	3 (XR_243654.5,NM_001168.3); 4 (XR_934452.3,NM_001012271.2)	745
BIRC5	BIRC5_05	BIRC5	NM_001012270.2; NM_001012271.2; NM_001168.3; XR_243654.5; XR_934452.3	3 (NM_001012270.2); 4 (NM_001168.3); 5 (XR_243654.5,NM_001012271.2); 6 (XR_934452.3)	746
BIRC7	BIRC7_01	BIRC7	NM_022161.4; NM_139317.3	1-2 (NM_139317.3,NM_022161.4)	747
BIRC7	BIRC7_02	BIRC7	NM_022161.4; NM_139317.3	3 (NM_139317.3,NM_022161.4)	748
BLK	BLK_01	BLK	NM_001330465.2; NM_001715.3; XM_011543824.1; XM_011543825.3; XM_011543827.1	10 (NM_001715.3,XM_011543825.3,XM_011543824.1); 9 (NM_001330465.2,XM_011543827.1)	749
BLK	BLK_02	BLK	NM_001330465.2; NM_001715.3; XM_011543824.1; XM_011543825.3; XM_011543827.1; XM_011543828.3; XM_011543829.3	4 (NM_001330465.2,XM_011543827.1); 5 (NM_001715.3,XM_011543825.3,XM_011543824.1,XM_011543828.3,XM_011543829.3)	750
BLK	BLK_03	BLK	NM_001330465.2; NM_001715.3; XM_011543824.1; XM_011543827.1; XM_011543828.3; XM_011543829.3	1 (NM_001330465.2,XM_011543827.1,NM_001715.3,XM_011543824.1,XM_011543828.3,XM_011543829.3)	751
BLK	BLK_04	BLK	NM_001330465.2; NM_001715.3; XM_011543824.1; XM_011543827.1; XM_011543828.3; XM_011543829.3	1 (NM_001330465.2,XM_011543827.1,NM_001715.3,XM_011543824.1,XM_011543828.3,XM_011543829.3)	752
BLK	BLK_05	BLK	NM_001330465.2; NM_001715.3; XM_011543824.1; XM_011543825.3; XM_011543827.1	10-11 (NM_001715.3,XM_011543825.3,XM_011543824.1); 9-10 (NM_001330465.2,XM_011543827.1)	753
BLM	BLM_01	BLM	NM_000057.4; NM_001287246.2; NM_001287247.2; NM_001287248.2; XM_006720632.2; XM_011521881.2; XM_011521882.3	12-13 (NM_001287247.2,NM_000057.4,NM_001287248.2,XM_011521882.3); 13-14 (NM_001287246.2); 6-7 (XM_006720632.2); 9-10 (XM_011521881.2)	754
BLM	BLM_02	BLM	NM_000057.4; NM_001287246.2; NM_001287247.2; NM_001287248.2; XM_006720632.2; XM_011521881.2	11 (XM_011521881.2); 14 (NM_001287247.2,NM_000057.4,NM_001287248.2); 15 (NM_001287246.2); 8 (XM_006720632.2)	755
BLM	BLM_03	BLM	NM_000057.4; NM_001287246.2; NM_001287247.2; NM_001287248.2; XM_006720632.2; XM_011521881.2; XM_011521882.3	10-11 (NM_001287246.2); 3-4 (XM_006720632.2); 6-7 (XM_011521881.2); 9-10 (NM_001287247.2,NM_000057.4,NM_001287248.2,XM_011521882.3)	756
BLM	BLM_04	BLM	NM_000057.4; NM_001287246.2; NM_001287247.2; NM_001287248.2; XM_006720632.2; XM_011521881.2; XM_011521882.3	2-3 (XM_006720632.2); 5-6 (XM_011521881.2); 8-9 (NM_001287247.2,NM_000057.4,NM_001287248.2,XM_011521882.3); 9-10 (NM_001287246.2)	757
BLM	BLM_05	BLM	NM_000057.4; NM_001287246.2; NM_001287247.2; NM_001287248.2; XM_011521882.3	1-2 (NM_001287247.2,NM_000057.4,NM_001287246.2,NM_001287248.2,XM_011521882.3)	758
BLNK	BLNK_01	BLNK	NM_001114094.1; NM_001258440.1; NM_001258441.1; NM_001258442.1; NM_013314.4; NR_047680.1; NR_047681.1; NR_047682.1; NR_047683.1	4-5 (NM_013314.4,NM_001258440.1,NR_047682.1,NM_001258442.1,NR_047683.1,NM_001114094.1,NR_047680.1,NM_001258441.1,NR_047681.1)	759
BLNK	BLNK_02	BLNK	NM_001114094.1; NM_001258440.1; NM_001258441.1; NM_001258442.1; NM_013314.4; NR_047680.1; NR_047681.1; NR_047682.1; NR_047683.1	14 (NM_001258442.1,NR_047683.1); 15 (NR_047682.1,NM_001258441.1,NR_047681.1); 16 (NM_001258440.1,NM_001114094.1,NR_047680.1); 17 (NM_013314.4)	760
BLNK	BLNK_03	BLNK	NM_001114094.1; NM_001258440.1; NM_001258441.1; NM_001258442.1; NM_013314.4; NR_047680.1; NR_047681.1; NR_047682.1; NR_047683.1	13 (NR_047682.1,NM_001258442.1,NR_047683.1,NR_047681.1); 14 (NM_001114094.1,NR_047680.1,NM_001258441.1); 15 (NM_013314.4,NM_001258440.1)	761
BLNK	BLNK_04	BLNK	NM_001114094.1; NM_001258440.1; NM_001258441.1; NM_001258442.1; NM_013314.4; NR_047680.1; NR_047681.1; NR_047682.1; NR_047683.1	4-5 (NM_013314.4,NM_001258440.1,NR_047682.1,NM_001258442.1,NR_047683.1,NM_001114094.1,NR_047680.1,NM_001258441.1,NR_047681.1)	762
BLNK	BLNK_05	BLNK	NM_001114094.1; NM_001258440.1; NM_001258441.1; NM_001258442.1; NM_013314.4; NR_047680.1; NR_047681.1; NR_047682.1; NR_047683.1	10-11 (NM_013314.4,NM_001258440.1); 8-9 (NR_047682.1,NM_001258442.1,NR_047683.1,NR_047681.1); 9-10 (NM_001114094.1,NR_047680.1,NM_001258441.1)	763
BLVRA	BLVRA_01	BLVRA	NM_000712.4; NM_001253823.1; XM_011515474.3; XM_017012520.2; XM_024446867.1	3-4 (XM_017012520.2,NM_000712.4,XM_024446867.1,XM_011515474.3); 4-5 (NM_001253823.1)	764
BLVRA	BLVRA_02	BLVRA	NM_000712.4; NM_001253823.1; XM_011515474.3; XM_017012520.2; XM_024446867.1	8 (XM_017012520.2,NM_000712.4,XM_024446867.1,XM_011515474.3); 9 (NM_001253823.1)	765
BLVRA	BLVRA_03	BLVRA	NM_000712.4; NM_001253823.1; XM_011515474.3; XM_017012520.2; XM_024446867.1	8 (XM_017012520.2,NM_000712.4,XM_024446867.1,XM_011515474.3); 9 (NM_001253823.1)	766
BLVRA	BLVRA_04	BLVRA	NM_000712.4; NM_001253823.1; XM_011515474.3; XM_017012520.2; XM_024446867.1	6-7 (XM_017012520.2,NM_000712.4,XM_024446867.1,XM_011515474.3); 7-8 (NM_001253823.1)	767
BLVRA	BLVRA_05	BLVRA	NM_000712.4; NM_001253823.1; XM_011515474.3; XM_017012520.2; XM_024446867.1	6 (XM_017012520.2,NM_000712.4,XM_024446867.1,XM_011515474.3); 7 (NM_001253823.1)	768
BMI1	BMI1_01	BMI1	NM_005180.9	1 (NM_005180.9)	769
BMI1	BMI1_02	BMI1	NM_005180.9	1 (NM_005180.9)	770
BMP2	BMP2_01	BMP2	NM_001200.4	3 (NM_001200.4)	771
BMP2	BMP2_02	BMP2	NM_001200.4	1-2 (NM_001200.4)	772
BMP2	BMP2_03	BMP2	NM_001200.4	1 (NM_001200.4)	773
BMP2	BMP2_04	BMP2	NM_001200.4	3 (NM_001200.4)	774
BMP2	BMP2_05	BMP2	NM_001200.4	3 (NM_001200.4)	775
BMP4	BMP4_01	BMP4	NM_001202.6; NM_001347912.1; NM_001347913.1; NM_001347914.1; NM_001347915.1; NM_001347916.1; NM_001347917.1; NM_130850.5; NM_130851.3	3 (NM_001347915.1,NM_001347914.1); 4 (NM_001202.6,NM_001347916.1,NM_130851.3,NM_001347913.1,NM_001347912.1,NM_130850.5,NM_001347917.1)	776
BMP4	BMP4_02	BMP4	NM_001202.6; NM_001347912.1; NM_001347913.1; NM_001347914.1; NM_001347915.1; NM_001347916.1; NM_001347917.1; NM_130850.5; NM_130851.3	3 (NM_001347915.1,NM_001347914.1); 4 (NM_001202.6,NM_001347916.1,NM_130851.3,NM_001347913.1,NM_001347912.1,NM_130850.5,NM_001347917.1)	777
BMP4	BMP4_03	BMP4	NM_001202.6; NM_001347912.1; NM_001347913.1; NM_001347914.1; NM_001347915.1; NM_001347916.1; NM_001347917.1; NM_130850.5; NM_130851.3	3 (NM_001347915.1,NM_001347914.1); 4 (NM_001202.6,NM_001347916.1,NM_130851.3,NM_001347913.1,NM_001347912.1,NM_130850.5,NM_001347917.1)	778
BMP4	BMP4_04	BMP4	NM_001202.6; NM_001347912.1; NM_001347913.1; NM_001347914.1; NM_001347915.1; NM_001347916.1; NM_001347917.1; NM_130850.5; NM_130851.3	3 (NM_001347915.1,NM_001347914.1); 4 (NM_001202.6,NM_001347916.1,NM_130851.3,NM_001347913.1,NM_001347912.1,NM_130850.5,NM_001347917.1)	779
BMP4	BMP4_05	BMP4	NM_001202.6; NM_001347912.1; NM_001347913.1; NM_001347914.1; NM_001347915.1; NM_001347916.1; NM_001347917.1; NM_130850.5; NM_130851.3	3 (NM_001347915.1,NM_001347914.1); 4 (NM_001202.6,NM_001347916.1,NM_130851.3,NM_001347913.1,NM_001347912.1,NM_130850.5,NM_001347917.1)	780
BMP5	BMP5_01	BMP5	NM_001329754.2; NM_001329756.2; NM_021073.4; XM_011514817.3; XM_024446524.1	1 (XM_011514817.3,XM_024446524.1,NM_001329754.2,NM_001329756.2,NM_021073.4)	781
BMP5	BMP5_02	BMP5	NM_001329754.2; NM_001329756.2; NM_021073.4; XM_011514817.3; XM_024446524.1	1 (XM_011514817.3,XM_024446524.1,NM_001329754.2,NM_001329756.2,NM_021073.4)	782
BMP5	BMP5_03	BMP5	NM_001329754.2; NM_001329756.2; NM_021073.4	5 (NM_001329756.2); 6 (NM_001329754.2); 7 (NM_021073.4)	783
BMP5	BMP5_04	BMP5	NM_001329754.2; NM_001329756.2; NM_021073.4; XM_011514817.3; XM_024446524.1	1 (XM_011514817.3,XM_024446524.1,NM_001329754.2,NM_001329756.2,NM_021073.4)	784
BMP5	BMP5_05	BMP5	NM_001329754.2; NM_001329756.2; NM_021073.4; XM_011514817.3; XM_024446524.1	2 (XM_011514817.3,XM_024446524.1,NM_001329754.2,NM_001329756.2,NM_021073.4)	785
BMP6	BMP6_01	BMP6	NM_001718.6	2 (NM_001718.6)	786
BMP6	BMP6_02	BMP6	NM_001718.6	2-3 (NM_001718.6)	787
BMP6	BMP6_03	BMP6	NM_001718.6	7 (NM_001718.6)	788
BMP6	BMP6_04	BMP6	NM_001718.6	7 (NM_001718.6)	789
BMP6	BMP6_05	BMP6	NM_001718.6	7 (NM_001718.6)	790
BMP7	BMP7_01	BMP7	NM_001719.3	7 (NM_001719.3)	791
BMP7	BMP7_02	BMP7	NM_001719.3	1 (NM_001719.3)	792
BMP7	BMP7_03	BMP7	NM_001719.3	2 (NM_001719.3)	793
BMP7	BMP7_04	BMP7	NM_001719.3	7 (NM_001719.3)	794
BMP7	BMP7_05	BMP7	NM_001719.3	7 (NM_001719.3)	795
BMP8A	BMP8A_01	BMP8A	NM_181809.4	7 (NM_181809.4)	796
BMP8A	BMP8A_02	BMP8A	NM_181809.4	7 (NM_181809.4)	797
BMP8A	BMP8A_03	BMP8A	NM_181809.4	7 (NM_181809.4)	798
BMP8A	BMP8A_04	BMP8A	NM_181809.4	7 (NM_181809.4)	799
BMP8A	BMP8A_05	BMP8A	NM_181809.4	7 (NM_181809.4)	800
BMPR1B	BMPR1B_01	BMPR1B	NM_001203.3; NM_001256792.1; NM_001256793.2; NM_001256794.1; XM_011532201.2; XM_017008558.1; XM_017008559.1; XM_017008560.1; XM_017008561.1	3 (NM_001256793.2,NM_001256792.1,XM_017008560.1,NM_001256794.1); 4 (XM_017008561.1,XM_011532201.2); 5 (XM_017008558.1,NM_001203.3); 6 (XM_017008559.1)	801
BMPR1B	BMPR1B_02	BMPR1B	NM_001203.3; NM_001256792.1; NM_001256793.2; NM_001256794.1; XM_011532201.2; XM_017008558.1; XM_017008559.1; XM_017008560.1; XM_017008561.1	2-3 (NM_001256793.2,NM_001256792.1,XM_017008560.1,NM_001256794.1); 3-4 (XM_017008561.1,XM_011532201.2); 4-5 (XM_017008558.1,NM_001203.3); 5-6 (XM_017008559.1)	802
BMPR1B	BMPR1B_03	BMPR1B	NM_001203.3; NM_001256792.1; NM_001256793.2; NM_001256794.1; XM_011532201.2; XM_017008558.1; XM_017008559.1; XM_017008560.1; XM_017008561.1	11 (NM_001256793.2,NM_001256792.1,XM_017008560.1,NM_001256794.1); 12 (XM_017008561.1,XM_011532201.2); 13 (XM_017008558.1,NM_001203.3); 14 (XM_017008559.1)	803
BMPR1B	BMPR1B_04	BMPR1B	NM_001203.3; NM_001256792.1; NM_001256793.2; NM_001256794.1; XM_011532201.2; XM_017008558.1; XM_017008559.1; XM_017008560.1; XM_017008561.1	11 (NM_001256793.2,NM_001256792.1,XM_017008560.1,NM_001256794.1); 12 (XM_017008561.1,XM_011532201.2); 13 (XM_017008558.1,NM_001203.3); 14 (XM_017008559.1)	804
BMPR1B	BMPR1B_05	BMPR1B	NM_001203.3; NM_001256792.1; NM_001256793.2; NM_001256794.1; XM_011532201.2; XM_017008558.1; XM_017008559.1; XM_017008560.1; XM_017008561.1	1-2 (NM_001256793.2,NM_001256792.1,XM_017008560.1,NM_001256794.1); 2-3 (XM_017008561.1,XM_011532201.2); 3-4 (XM_017008558.1,NM_001203.3); 4-5 (XM_017008559.1)	805
BNIP3	BNIP3_01	BNIP3	NM_004052.3	6 (NM_004052.3)	806
BNIP3L	BNIP3L_01	BNIP3L	NM_001330491.2; NM_004331.3	6 (NM_004331.3,NM_001330491.2)	807
BNIP3L	BNIP3L_02	BNIP3L	NM_001330491.2; NM_004331.3	6 (NM_004331.3,NM_001330491.2)	808
BNIP3L	BNIP3L_03	BNIP3L	NM_001330491.2; NM_004331.3	6 (NM_004331.3,NM_001330491.2)	809
BNIP3L	BNIP3L_04	BNIP3L	NM_001330491.2; NM_004331.3	6 (NM_004331.3,NM_001330491.2)	810
BNIP3L	BNIP3L_05	BNIP3L	NM_001330491.2; NM_004331.3	4 (NM_004331.3,NM_001330491.2)	811
BRAF	BRAF_01	BRAF	NM_001374244.1; NM_001378469.1; NM_001378473.1; NM_004333.6; XR_001744857.1	18 (NM_001378469.1,NM_001378473.1,NM_004333.6); 19 (NM_001374244.1); 20 (XR_001744857.1)	812
BRAF	BRAF_02	BRAF	NM_001374244.1; NM_001378469.1; NM_001378473.1; NM_004333.6; XR_001744857.1	18 (NM_001378469.1,NM_001378473.1,NM_004333.6); 19 (NM_001374244.1); 20 (XR_001744857.1)	813
BRAF	BRAF_03	BRAF	NM_001374244.1; NM_001378469.1; NM_001378473.1; NM_004333.6; XR_001744857.1	18 (NM_001378469.1,NM_001378473.1,NM_004333.6); 19 (NM_001374244.1); 20 (XR_001744857.1)	814
BRAF	BRAF_04	BRAF	NM_001374244.1; NM_001378469.1; NM_001378473.1; NM_004333.6; XR_001744857.1	18 (NM_001378469.1,NM_001378473.1,NM_004333.6); 19 (NM_001374244.1); 20 (XR_001744857.1)	815
BRAF	BRAF_05	BRAF	NM_001374244.1; NM_001378469.1; NM_001378473.1; NM_004333.6; XR_001744857.1	18 (NM_001378469.1,NM_001378473.1,NM_004333.6); 19 (NM_001374244.1); 20 (XR_001744857.1)	816
BRCA1	BRCA1_01	BRCA1	NM_007294.4; NM_007297.4; NM_007298.3; NM_007299.4; NM_007300.4; NR_027676.2	6 (NM_007297.4,NM_007298.3); 7 (NM_007294.4,NM_007299.4,NR_027676.2,NM_007300.4)	817
BRCA1	BRCA1_02	BRCA1	NM_007294.4; NM_007297.4; NM_007298.3; NM_007299.4; NM_007300.4; NR_027676.2	11 (NM_007297.4,NM_007298.3); 12 (NM_007294.4,NM_007299.4,NR_027676.2,NM_007300.4)	818
BRCA1	BRCA1_03	BRCA1	NM_007294.4; NM_007297.4; NM_007298.3; NM_007299.4; NM_007300.4; NR_027676.2	13 (NM_007297.4,NM_007298.3); 14 (NM_007294.4,NM_007299.4,NR_027676.2); 15 (NM_007300.4)	819
BRCA1	BRCA1_04	BRCA1	NM_007294.4; NM_007297.4; NM_007298.3; NM_007299.4; NM_007300.4; NR_027676.2	18 (NM_007297.4,NM_007298.3); 19 (NM_007294.4,NM_007299.4,NR_027676.2); 20 (NM_007300.4)	820
BRCA1	BRCA1_05	BRCA1	NM_007294.4; NM_007297.4; NM_007298.3; NM_007299.4; NM_007300.4; NR_027676.2	22 (NM_007299.4,NM_007297.4,NM_007298.3); 23 (NM_007294.4,NR_027676.2); 24 (NM_007300.4)	821
BRCA2	BRCA2_01	BRCA2	NM_000059.4	11 (NM_000059.4)	822
BRCA2	BRCA2_02	BRCA2	NM_000059.4	11 (NM_000059.4)	823
BRCA2	BRCA2_03	BRCA2	NM_000059.4	27 (NM_000059.4)	824
BRCA2	BRCA2_04	BRCA2	NM_000059.4	16 (NM_000059.4)	825
BRCA2	BRCA2_05	BRCA2	NM_000059.4	7-8 (NM_000059.4)	826
BRD2	BRD2_01	BRD2	NM_001113182.3; NM_001199455.1; NM_001199456.1; NM_001291986.2; NM_005104.4; XR_001743557.2; XR_241911.3	3-4 (NM_001199455.1,XR_241911.3,XR_001743557.2,NM_001199456.1); 4-5 (NM_001113182.3,NM_005104.4); 5-6 (NM_001291986.2)	827
BRD2	BRD2_02	BRD2	NM_001113182.3; NM_001199455.1; NM_001199456.1; NM_001291986.2; NM_005104.4; XR_001743557.2; XR_241911.3	2 (NM_001199455.1,XR_241911.3,XR_001743557.2,NM_001199456.1); 3 (NM_001113182.3,NM_005104.4,NM_001291986.2)	828
BRD2	BRD2_03	BRD2	NM_001113182.3; NM_001199455.1; NM_001199456.1; NM_001291986.2; NM_005104.4; XR_001743557.2	10 (XR_001743557.2,NM_001199456.1); 11 (NM_001199455.1,NM_001113182.3,NM_005104.4); 12 (NM_001291986.2)	829
BRD2	BRD2_04	BRD2	NM_001113182.3; NM_001199455.1; NM_001291986.2; NM_005104.4; XR_001743557.2; XR_241911.3	1 (NM_001199455.1,XR_241911.3,XR_001743557.2); 2 (NM_001113182.3,NM_005104.4,NM_001291986.2)	830
BRD2	BRD2_05	BRD2	NM_001113182.3; NM_001199455.1; NM_001199456.1; NM_001291986.2; NM_005104.4; XR_001743557.2; XR_241911.3	10 (NM_001291986.2); 8 (NM_001199455.1,XR_241911.3,XR_001743557.2,NM_001199456.1); 9 (NM_001113182.3,NM_005104.4)	831
BRD3	BRD3_01	BRD3	NM_007371.4; XM_006717291.3; XM_011519052.2; XM_017015165.2; XM_017015166.2	12 (NM_007371.4,XM_017015165.2,XM_011519052.2,XM_006717291.3); 9 (XM_017015166.2)	832
BRD3	BRD3_02	BRD3	NM_007371.4	12 (NM_007371.4)	833
BRD3	BRD3_03	BRD3	NM_007371.4	12 (NM_007371.4)	834
BRD3	BRD3_04	BRD3	NM_007371.4	12 (NM_007371.4)	835
BRD3	BRD3_05	BRD3	NM_007371.4	12 (NM_007371.4)	836
BRD4	BRD4_01	BRD4	NM_001330384.2; NM_001379291.1; NM_001379292.1; NM_014299.2; NM_058243.2; XM_011527854.2; XM_011527856.3	2-3 (NM_001330384.2,XM_011527856.3,NM_014299.2,XM_011527854.2,NM_058243.2)	837
BRD4	BRD4_02	BRD4	NM_001330384.2; NM_001379291.1; NM_001379292.1; NM_014299.2; NM_058243.2; XM_011527854.2; XM_011527856.3	10 (NM_001330384.2,XM_011527856.3,NM_014299.2,XM_011527854.2,NM_058243.2)	838
BRD4	BRD4_03	BRD4	NM_001330384.2; NM_001379291.1; NM_001379292.1; NM_014299.2; NM_058243.2; XM_011527854.2; XM_011527856.3	7 (NM_001330384.2,XM_011527856.3,NM_014299.2,XM_011527854.2,NM_058243.2)	839
BRD4	BRD4_04	BRD4	NM_001330384.2; NM_001379291.1; NM_001379292.1; NM_014299.2; NM_058243.2; XM_011527854.2; XM_011527856.3	2 (NM_001330384.2,XM_011527856.3,NM_014299.2,XM_011527854.2,NM_058243.2)	840
BRD4	BRD4_05	BRD4	NM_001330384.2; NM_001379291.1; NM_001379292.1; NM_014299.2; NM_058243.2; XM_011527854.2; XM_011527856.3	10 (NM_001330384.2,XM_011527856.3,NM_014299.2,XM_011527854.2,NM_058243.2)	841
BRD7	BRD7_01	BRD7	NM_001173984.3; NM_013263.5; XM_011523046.3; XM_011523047.2; XM_011523048.2; XM_011523049.2; XM_011523050.3; XM_017023179.1; XM_017023180.1; XM_017023181.1; XR_001751896.2; XR_933289.3; XR_933290.3; XR_933291.3	10 (XR_933291.3,XM_011523049.2,XM_011523048.2,XM_017023180.1,XM_017023179.1); 11 (NM_001173984.3,XR_933289.3,NM_013263.5,XR_001751896.2,XR_933290.3,XM_011523046.3,XM_011523047.2); 7 (XM_017023181.1,XM_011523050.3)	842
BRD7	BRD7_02	BRD7	NM_001173984.3; NM_013263.5; XM_011523046.3; XM_011523047.2; XM_011523048.2; XM_011523049.2; XM_017023179.1; XM_017023180.1; XR_001751896.2; XR_933289.3; XR_933290.3; XR_933291.3	5-6 (XR_933291.3,XM_011523049.2,NM_001173984.3,XR_933289.3,NM_013263.5,XR_001751896.2,XR_933290.3,XM_011523048.2,XM_017023180.1,XM_011523046.3,XM_017023179.1,XM_011523047.2)	843
BRD7	BRD7_03	BRD7	NM_001173984.3; NM_013263.5; XM_011523046.3; XM_011523047.2; XM_011523048.2; XM_011523049.2; XM_017023179.1; XM_017023180.1; XR_001751896.2; XR_933289.3; XR_933290.3; XR_933291.3	1-2 (XR_933291.3,XM_011523049.2,NM_001173984.3,XR_933289.3,NM_013263.5,XR_001751896.2,XR_933290.3,XM_011523048.2,XM_017023180.1,XM_011523046.3,XM_017023179.1,XM_011523047.2)	844
BRD7	BRD7_04	BRD7	NM_001173984.3; NM_013263.5; XM_011523046.3; XM_011523047.2; XM_011523048.2; XM_011523049.2; XM_017023179.1; XM_017023180.1; XR_001751896.2; XR_933289.3; XR_933290.3; XR_933291.3	2 (XR_933291.3,XM_011523049.2,NM_001173984.3,XR_933289.3,NM_013263.5,XR_001751896.2,XR_933290.3,XM_011523048.2,XM_017023180.1,XM_011523046.3,XM_017023179.1,XM_011523047.2)	845
BRD7	BRD7_05	BRD7	NM_001173984.3; NM_013263.5; XM_011523046.3; XM_011523047.2; XM_011523048.2; XM_011523049.2; XM_017023179.1; XM_017023180.1; XR_001751896.2; XR_933289.3; XR_933290.3; XR_933291.3	5-6 (XR_933291.3,XM_011523049.2,NM_001173984.3,XR_933289.3,NM_013263.5,XR_001751896.2,XR_933290.3,XM_011523048.2,XM_017023180.1,XM_011523046.3,XM_017023179.1,XM_011523047.2)	846
BRIP1	BRIP1_01	BRIP1	NM_032043.3; XM_011525332.3; XM_011525333.3; XM_011525334.2; XM_011525335.3; XM_011525336.2; XM_011525337.2; XM_011525338.2; XM_011525339.3; XM_011525340.3; XM_011525341.3; XM_017025200.1	2 (XM_017025200.1,XM_011525338.2); 6 (XM_011525332.3,XM_011525341.3,XM_011525333.3,XM_011525334.2,NM_032043.3,XM_011525337.2,XM_011525335.3,XM_011525340.3,XM_011525339.3,XM_011525336.2)	847
BRIP1	BRIP1_02	BRIP1	NM_032043.3; XM_011525332.3; XM_011525333.3; XM_011525334.2; XM_011525335.3; XM_011525336.2; XM_011525337.2; XM_011525338.2; XM_017025200.1; XM_017025201.1; XM_017025202.1; XM_017025203.1	16 (XM_017025200.1,XM_017025201.1); 17 (XM_011525338.2); 19 (XM_011525337.2); 20 (NM_032043.3,XM_011525336.2); 21 (XM_011525332.3,XM_011525333.3,XM_011525334.2,XM_011525335.3); 8 (XM_017025202.1); 9 (XM_017025203.1)	848
BRIP1	BRIP1_03	BRIP1	NM_032043.3; XM_011525332.3; XM_011525333.3; XM_011525334.2; XM_011525335.3; XM_011525336.2; XM_011525337.2; XM_011525338.2; XM_011525339.3; XM_011525340.3; XM_017025200.1; XM_017025201.1; XM_017025202.1; XM_017025203.1	11 (XM_017025200.1,XM_017025201.1); 12 (XM_011525338.2); 14 (XM_011525337.2); 15 (NM_032043.3,XM_011525336.2); 16 (XM_011525332.3,XM_011525333.3,XM_011525334.2,XM_011525335.3,XM_011525340.3,XM_011525339.3); 3 (XM_017025202.1); 4 (XM_017025203.1)	849
BRIP1	BRIP1_04	BRIP1	NM_032043.3; XM_011525332.3; XM_011525333.3; XM_011525334.2; XM_011525335.3; XM_011525336.2; XM_011525337.2; XM_011525338.2; XM_011525339.3; XM_011525340.3; XM_017025200.1; XM_017025201.1; XM_017025202.1; XM_017025203.1	12 (XM_017025200.1,XM_017025201.1); 13 (XM_011525338.2); 15 (XM_011525337.2); 16 (NM_032043.3,XM_011525336.2); 17 (XM_011525332.3,XM_011525333.3,XM_011525334.2,XM_011525335.3,XM_011525340.3,XM_011525339.3); 4 (XM_017025202.1); 5 (XM_017025203.1)	850
BRIP1	BRIP1_05	BRIP1	NM_032043.3; XM_011525332.3; XM_011525333.3; XM_011525334.2; XM_011525335.3; XM_011525336.2; XM_011525337.2; XM_011525338.2; XM_011525339.3; XM_011525340.3; XM_011525341.3; XM_017025200.1; XM_017025201.1	4 (XM_017025201.1); 5 (XM_017025200.1,XM_011525338.2); 9 (XM_011525332.3,XM_011525341.3,XM_011525333.3,XM_011525334.2,NM_032043.3,XM_011525337.2,XM_011525335.3,XM_011525340.3,XM_011525339.3,XM_011525336.2)	851
BST1	BST1_01	BST1	NM_004334.3; XM_011513881.2	9 (NM_004334.3,XM_011513881.2)	852
BST1	BST1_02	BST1	NM_004334.3; XM_005248185.2; XM_005248186.2; XM_011513878.3; XM_011513879.2; XM_011513881.2; XM_017008565.2; XM_017008566.2	3-4 (NM_004334.3,XM_011513881.2,XM_011513879.2,XM_017008565.2,XM_005248185.2,XM_011513878.3,XM_017008566.2,XM_005248186.2)	853
BST1	BST1_03	BST1	NM_004334.3; XM_005248185.2; XM_005248186.2; XM_011513878.3; XM_011513879.2; XM_011513881.2; XM_017008565.2; XM_017008566.2	3-4 (NM_004334.3,XM_011513881.2,XM_011513879.2,XM_017008565.2,XM_005248185.2,XM_011513878.3,XM_017008566.2,XM_005248186.2)	854
BST1	BST1_04	BST1	NM_004334.3; XM_005248185.2; XM_005248186.2; XM_011513878.3; XM_011513879.2; XM_011513881.2; XM_017008565.2; XM_017008566.2	5-6 (NM_004334.3,XM_011513881.2,XM_011513879.2,XM_017008565.2,XM_005248185.2,XM_011513878.3,XM_017008566.2,XM_005248186.2)	855
BST1	BST1_05	BST1	NM_004334.3; XM_005248185.2; XM_005248186.2; XM_011513878.3; XM_011513879.2; XM_011513881.2; XM_017008565.2; XM_017008566.2	2-3 (NM_004334.3,XM_011513881.2,XM_011513879.2,XM_017008565.2,XM_005248185.2,XM_011513878.3,XM_017008566.2,XM_005248186.2)	856
BST2	BST2_01	BST2	NM_004335.4	3 (NM_004335.4)	857
BST2	BST2_02	BST2	NM_004335.4	2 (NM_004335.4)	858
BST2	BST2_03	BST2	NM_004335.4	4-5 (NM_004335.4)	859
BST2	BST2_04	BST2	NM_004335.4	5 (NM_004335.4)	860
BST2	BST2_05	BST2	NM_004335.4	3 (NM_004335.4)	861
BTK	BTK_01	BTK	NM_000061.3; NM_001287344.1; NM_001287345.1	7-8 (NM_000061.3,NM_001287344.1); 8-9 (NM_001287345.1)	862
BTK	BTK_02	BTK	NM_000061.3; NM_001287344.1; NM_001287345.1	15 (NM_001287345.1); 17 (NM_000061.3,NM_001287344.1)	863
BTK	BTK_03	BTK	NM_000061.3; NM_001287344.1; NM_001287345.1	17 (NM_001287345.1); 19 (NM_000061.3,NM_001287344.1)	864
BTK	BTK_04	BTK	NM_000061.3; NM_001287344.1; NM_001287345.1	15 (NM_001287345.1); 17 (NM_000061.3,NM_001287344.1)	865
BTK	BTK_05	BTK	NM_000061.3; NM_001287344.1; NM_001287345.1	13-14 (NM_001287345.1); 15-16 (NM_000061.3,NM_001287344.1)	866
BTLA	BTLA_01	BTLA	NM_001085357.2; NM_181780.4; XM_011512447.3; XM_017005748.2	4 (NM_001085357.2); 5 (NM_181780.4); 6 (XM_011512447.3,XM_017005748.2)	867
BTLA	BTLA_02	BTLA	NM_001085357.2; NM_181780.4; XM_011512447.3; XM_017005748.2	4 (NM_001085357.2); 5 (NM_181780.4); 6 (XM_011512447.3,XM_017005748.2)	868
BTLA	BTLA_03	BTLA	NM_001085357.2; NM_181780.4; XM_011512447.3; XM_017005748.2	4 (NM_001085357.2); 5 (NM_181780.4); 6 (XM_011512447.3,XM_017005748.2)	869
BTLA	BTLA_04	BTLA	NM_001085357.2; NM_181780.4; XM_011512447.3; XM_017005748.2	2 (NM_001085357.2,NM_181780.4); 3 (XM_011512447.3,XM_017005748.2)	870
BTLA	BTLA_05	BTLA	NM_001085357.2; NM_181780.4; XM_011512447.3; XM_017005748.2	2 (NM_001085357.2,NM_181780.4); 3 (XM_011512447.3,XM_017005748.2)	871
C1QA	C1QA_01	C1QA	NM_001347465.2; NM_001347466.1; NM_015991.4	3 (NM_015991.4,NM_001347466.1,NM_001347465.2)	872
C1QA	C1QA_02	C1QA	NM_001347465.2; NM_001347466.1; NM_015991.4	3 (NM_015991.4,NM_001347466.1,NM_001347465.2)	873
C1QA	C1QA_03	C1QA	NM_001347465.2; NM_001347466.1; NM_015991.4	3 (NM_015991.4,NM_001347466.1,NM_001347465.2)	874
C1QA	C1QA_04	C1QA	NM_001347465.2; NM_001347466.1; NM_015991.4	3 (NM_015991.4,NM_001347466.1,NM_001347465.2)	875
C1QA	C1QA_05	C1QA	NM_001347465.2; NM_001347466.1; NM_015991.4	2 (NM_015991.4,NM_001347466.1,NM_001347465.2)	876
C1QB	C1QB_01	C1QB	NM_000491.5; NM_001371184.3; NM_001378156.1	1-2 (NM_001378156.1,NM_000491.5); 2-3 (NM_001371184.3)	877
C1QB	C1QB_02	C1QB	NM_000491.5; NM_001371184.3; NM_001378156.1	3 (NM_001378156.1,NM_000491.5); 4 (NM_001371184.3)	878
C1QB	C1QB_03	C1QB	NM_000491.5; NM_001371184.3; NM_001378156.1	3 (NM_001378156.1,NM_000491.5); 4 (NM_001371184.3)	879
C1QBP	C1QBP_01	C1QBP	NM_001212.4	6 (NM_001212.4)	880
C1QBP	C1QBP_02	C1QBP	NM_001212.4	5 (NM_001212.4)	881
C1QBP	C1QBP_03	C1QBP	NM_001212.4	3-4 (NM_001212.4)	882
C1QBP	C1QBP_04	C1QBP	NM_001212.4	5-6 (NM_001212.4)	883
C1QBP	C1QBP_05	C1QBP	NM_001212.4	1-2 (NM_001212.4)	884
C1R	C1R_01	C1R	NM_001354346.2; NM_001733.7	11 (NM_001733.7,NM_001354346.2)	885
C1R	C1R_02	C1R	NM_001354346.2; NM_001733.7	7-8 (NM_001733.7,NM_001354346.2)	886
C1R	C1R_03	C1R	NM_001354346.2; NM_001733.7	7 (NM_001733.7,NM_001354346.2)	887
C1R	C1R_04	C1R	NM_001354346.2; NM_001733.7	11 (NM_001733.7,NM_001354346.2)	888
C1R	C1R_05	C1R	NM_001354346.2; NM_001733.7	11 (NM_001733.7,NM_001354346.2)	889
C1S	C1S_01	C1S	NM_001346850.2; NM_001734.5; NM_201442.4; XM_005253760.2	7-8 (NM_001346850.2); 8-9 (XM_005253760.2,NM_001734.5,NM_201442.4)	890
C1S	C1S_02	C1S	NM_001346850.2; NM_001734.5; NM_201442.4; XM_005253760.2	11 (NM_001346850.2); 12 (XM_005253760.2,NM_001734.5,NM_201442.4)	891
C1S	C1S_03	C1S	NM_001346850.2; NM_001734.5; NM_201442.4; XM_005253760.2	5 (NM_001346850.2); 6 (XM_005253760.2,NM_001734.5,NM_201442.4)	892
C1S	C1S_04	C1S	NM_001734.5; NM_201442.4; XM_005253760.2	3 (XM_005253760.2,NM_001734.5,NM_201442.4)	893
C1S	C1S_05	C1S	NM_001346850.2; NM_001734.5; NM_201442.4; XM_005253760.2	11 (NM_001346850.2); 12 (XM_005253760.2,NM_001734.5,NM_201442.4)	894
C2	C2_01	C2	NM_000063.6; NM_001145903.3; NM_001178063.2; NM_001282457.2; NM_001282458.2	10-11 (NM_001282457.2,NM_001178063.2); 12-13 (NM_001145903.3); 14-15 (NM_000063.6,NM_001282458.2)	895
C2	C2_02	C2	NM_000063.6; NM_001145903.3; NM_001178063.2; NM_001282457.2; NM_001282458.2	4 (NM_001282457.2,NM_001178063.2); 6 (NM_001145903.3); 8 (NM_000063.6,NM_001282458.2)	896
C2	C2_03	C2	NM_000063.6; NM_001145903.3; NM_001178063.2; NM_001282457.2; NM_001282458.2	11 (NM_001282457.2,NM_001178063.2); 13 (NM_001145903.3); 15 (NM_000063.6,NM_001282458.2)	897
C2	C2_04	C2	NM_000063.6; NM_001145903.3; NM_001178063.2; NM_001282457.2; NM_001282458.2	4 (NM_001282457.2,NM_001178063.2); 6 (NM_001145903.3); 8 (NM_000063.6,NM_001282458.2)	898
C2	C2_05	C2	NM_000063.6; NM_001145903.3; NM_001178063.2; NM_001282457.2; NM_001282458.2	13-14 (NM_001282457.2,NM_001178063.2); 15-16 (NM_001145903.3); 17-18 (NM_000063.6,NM_001282458.2)	899
C3	C3_01	C3	NM_000064.4	21 (NM_000064.4)	900
C3	C3_02	C3	NM_000064.4	34 (NM_000064.4)	901
C3	C3_03	C3	NM_000064.4	8 (NM_000064.4)	902
C3	C3_04	C3	NM_000064.4	24 (NM_000064.4)	903
C3	C3_05	C3	NM_000064.4	37 (NM_000064.4)	904
C3AR1	C3AR1_01	C3AR1	NM_001326475.2; NM_001326477.2; NM_004054.4	2 (NM_001326475.2,NM_004054.4,NM_001326477.2)	905
C3AR1	C3AR1_02	C3AR1	NM_001326475.2; NM_001326477.2; NM_004054.4	2 (NM_001326475.2,NM_004054.4,NM_001326477.2)	906
C3AR1	C3AR1_03	C3AR1	NM_001326475.2; NM_001326477.2; NM_004054.4	2 (NM_001326475.2,NM_004054.4,NM_001326477.2)	907
C3AR1	C3AR1_04	C3AR1	NM_001326475.2; NM_001326477.2; NM_004054.4	2 (NM_001326475.2,NM_004054.4,NM_001326477.2)	908
C3AR1	C3AR1_05	C3AR1	NM_001326475.2; NM_001326477.2; NM_004054.4	2 (NM_001326475.2,NM_004054.4,NM_001326477.2)	909
C4B	C4B_01	C4A; C4B; C4B_2; LOC110384692	NM_001002029.4; NM_001242823.2; NM_001252204.1; NM_001352000.1; NM_007293.3	1 (NM_001002029.4)	910
C4B	C4B_02	C4A; C4B; C4B_2; LOC110384692	NM_001002029.4; NM_001242823.2; NM_001252204.1; NM_001352000.1; NM_007293.3	1-2 (NM_001002029.4)	911
C4B	C4B_03	C4A; C4B; C4B_2; LOC110384692	NM_001002029.4; NM_001242823.2; NM_001252204.1; NM_001352000.1; NM_007293.3	5 (NM_001002029.4)	912
C4B	C4B_04	C4A; C4B; C4B_2; LOC110384692	NM_001002029.4; NM_001242823.2; NM_001252204.1; NM_001352000.1; NM_007293.3	5-6 (NM_001002029.4)	913
C4B	C4B_05	C4A; C4B; C4B_2; LOC110384692	NM_001002029.4; NM_001242823.2; NM_001252204.1; NM_001352000.1; NM_007293.3	11 (NM_001002029.4)	914
C4BPA	C4BPA_01	C4BPA	NM_000715.4; XM_005273251.2; XM_005273252.4	2 (XM_005273251.2,XM_005273252.4,NM_000715.4)	915
C4BPA	C4BPA_02	C4BPA	NM_000715.4; XM_005273251.2; XM_005273252.4	3 (XM_005273251.2,XM_005273252.4,NM_000715.4)	916
C4BPA	C4BPA_03	C4BPA	NM_000715.4; XM_005273251.2; XM_005273252.4	9 (XM_005273251.2,XM_005273252.4,NM_000715.4)	917
C4BPA	C4BPA_04	C4BPA	NM_000715.4; XM_005273251.2; XM_005273252.4	11 (XM_005273251.2,XM_005273252.4,NM_000715.4)	918
C4BPA	C4BPA_05	C4BPA	NM_000715.4; XM_005273251.2; XM_005273252.4	8 (XM_005273251.2,XM_005273252.4,NM_000715.4)	919
C5	C5_01	C5	NM_001317163.2; NM_001317164.2; NM_001735.3	12 (NM_001735.3,NM_001317164.2,NM_001317163.2)	920
C5	C5_02	C5	NM_001317163.2; NM_001317164.2; NM_001735.3	3-4 (NM_001735.3,NM_001317164.2,NM_001317163.2)	921
C5	C5_03	C5	NM_001317163.2; NM_001317164.2; NM_001735.3	13 (NM_001735.3,NM_001317164.2,NM_001317163.2)	922
C5	C5_04	C5	NM_001317163.2; NM_001317164.2; NM_001735.3	12 (NM_001735.3,NM_001317164.2,NM_001317163.2)	923
C5	C5_05	C5	NM_001317163.2; NM_001735.3	22-23 (NM_001735.3,NM_001317163.2)	924
C5AR1	C5AR1_01	C5AR1	NM_001736.4; XM_005259190.5	2 (XM_005259190.5,NM_001736.4)	925
C5AR1	C5AR1_02	C5AR1	NM_001736.4; XM_005259190.5	2 (XM_005259190.5,NM_001736.4)	926
C5AR1	C5AR1_03	C5AR1	NM_001736.4; XM_005259190.5	2 (XM_005259190.5,NM_001736.4)	927
C5AR1	C5AR1_04	C5AR1	NM_001736.4; XM_005259190.5	2 (XM_005259190.5,NM_001736.4)	928
C5AR1	C5AR1_05	C5AR1	NM_001736.4; XM_005259190.5	2 (XM_005259190.5,NM_001736.4)	929
C6	C6_01	C6	NM_000065.5; NM_001115131.3; XM_006714496.4; XM_011514114.3; XM_011514115.3; XM_011514116.3; XM_011514117.3; XM_011514118.3; XM_011514119.3; XM_017009818.2; XM_017009819.2	2 (XM_017009819.2); 6 (NM_000065.5,XM_011514115.3,XM_011514118.3,XM_011514114.3,XM_006714496.4,NM_001115131.3,XM_011514119.3); 7 (XM_011514116.3,XM_011514117.3,XM_017009818.2)	930
C6	C6_02	C6	NM_000065.5; NM_001115131.3; XM_006714496.4; XM_011514114.3; XM_011514115.3; XM_011514116.3; XM_011514117.3; XM_011514118.3; XM_011514119.3; XM_011514121.3; XM_017009818.2; XM_017009819.2	14 (XM_011514121.3); 15 (XM_017009819.2); 18 (NM_000065.5,NM_001115131.3,XM_011514119.3); 19 (XM_011514115.3,XM_011514118.3,XM_011514114.3,XM_006714496.4); 20 (XM_011514116.3,XM_011514117.3,XM_017009818.2)	931
C6	C6_03	C6	NM_000065.5; NM_001115131.3; XM_006714496.4; XM_011514114.3; XM_011514115.3; XM_011514116.3; XM_011514117.3; XM_011514118.3; XM_011514119.3; XM_011514121.3; XM_017009818.2; XM_017009819.2	10 (XM_017009819.2); 13 (NM_000065.5,NM_001115131.3,XM_011514119.3); 14 (XM_011514115.3,XM_011514118.3,XM_011514114.3,XM_006714496.4); 15 (XM_011514116.3,XM_011514117.3,XM_017009818.2); 9 (XM_011514121.3)	932
C6	C6_04	C6	NM_000065.5; NM_001115131.3; XM_006714496.4; XM_011514114.3; XM_011514115.3; XM_011514116.3; XM_011514117.3; XM_011514118.3; XM_011514119.3; XM_011514121.3; XM_017009818.2; XM_017009819.2	3-4 (XM_011514121.3); 4-5 (XM_017009819.2); 8-9 (NM_000065.5,XM_011514115.3,XM_011514118.3,XM_011514114.3,XM_006714496.4,NM_001115131.3,XM_011514119.3); 9-10 (XM_011514116.3,XM_011514117.3,XM_017009818.2)	933
C6	C6_05	C6	NM_000065.5; NM_001115131.3; XM_006714496.4; XM_011514114.3; XM_011514115.3; XM_011514116.3; XM_011514117.3; XM_011514118.3; XM_011514119.3; XM_011514121.3; XM_017009818.2; XM_017009819.2	3 (XM_011514121.3); 4 (XM_017009819.2); 8 (NM_000065.5,XM_011514115.3,XM_011514118.3,XM_011514114.3,XM_006714496.4,NM_001115131.3,XM_011514119.3); 9 (XM_011514116.3,XM_011514117.3,XM_017009818.2)	934
C7	C7_01	C7	NM_000587.4	14 (NM_000587.4)	935
C7	C7_02	C7	NM_000587.4	8 (NM_000587.4)	936
C7	C7_03	C7	NM_000587.4	18 (NM_000587.4)	937
C7	C7_04	C7	NM_000587.4	1 (NM_000587.4)	938
C7	C7_05	C7	NM_000587.4	15 (NM_000587.4)	939
C8A	C8A_01	C8A	NM_000562.3; XM_011542079.2; XM_017002234.1	2-3 (NM_000562.3,XM_017002234.1,XM_011542079.2)	940
C8A	C8A_02	C8A	NM_000562.3	10 (NM_000562.3)	941
C8A	C8A_03	C8A	NM_000562.3	7-8 (NM_000562.3)	942
C8A	C8A_04	C8A	NM_000562.3; XM_011542079.2; XM_017002234.1	3 (NM_000562.3,XM_017002234.1,XM_011542079.2)	943
C8A	C8A_05	C8A	NM_000562.3; XM_011542079.2; XM_017002234.1	7 (NM_000562.3,XM_017002234.1,XM_011542079.2)	944
C8B	C8B_01	C8B	NM_000066.4; NM_001278543.1; NM_001278544.1; XM_017002235.1; XR_001737397.1	5 (XR_001737397.1,NM_000066.4); 6 (XM_017002235.1,NM_001278543.1,NM_001278544.1)	945
C8B	C8B_02	C8B	NM_000066.4; NM_001278543.1; NM_001278544.1; XM_017002235.1; XR_001737397.1	5 (XR_001737397.1,NM_000066.4); 6 (XM_017002235.1,NM_001278543.1,NM_001278544.1)	946
C8B	C8B_03	C8B	NM_000066.4; NM_001278543.1; NM_001278544.1; XM_017002235.1; XR_001737397.1	2 (XR_001737397.1,NM_000066.4,NM_001278544.1); 3 (XM_017002235.1,NM_001278543.1)	947
C8B	C8B_04	C8B	NM_000066.4; NM_001278543.1; NM_001278544.1; XM_017002235.1	7 (NM_000066.4); 8 (XM_017002235.1,NM_001278543.1,NM_001278544.1)	948
C8B	C8B_05	C8B	NM_000066.4; NM_001278543.1; NM_001278544.1; XM_017002235.1; XR_001737397.1	3-4 (XR_001737397.1,NM_000066.4); 4-5 (XM_017002235.1,NM_001278543.1,NM_001278544.1)	949
C8G	C8G_01	C8G	NM_000606.3; XR_245338.4	1-2 (NM_000606.3,XR_245338.4)	950
C8G	C8G_02	C8G	NM_000606.3; XR_245338.4	6-7 (NM_000606.3,XR_245338.4)	951
C8G	C8G_03	C8G	NM_000606.3; XR_245338.4	2 (NM_000606.3,XR_245338.4)	952
C9	C9_01	C9	NM_001737.5	10 (NM_001737.5)	953
C9	C9_02	C9	NM_001737.5	10 (NM_001737.5)	954
C9	C9_03	C9	NM_001737.5	2 (NM_001737.5)	955
C9	C9_04	C9	NM_001737.5	9 (NM_001737.5)	956
C9	C9_05	C9	NM_001737.5	5 (NM_001737.5)	957
CACNA1C	CACNA1C_01	CACNA1C	NM_000719.7; NM_001129827.2; NM_001129829.1; NM_001129830.3; NM_001129831.1; NM_001129832.1; NM_001129834.1; NM_001129835.1; NM_001129836.1; NM_001129837.1; NM_001129838.1; NM_001129839.1; NM_001129840.2; NM_001129843.1; NM_001129846.1; NM_001167625.1; NM_199460.3; XM_006719017.2; XM_011521023.3; XM_017019926.2; XM_017019927.2; XM_017019928.2; XM_017019929.2; XM_017019930.2; XM_017019931.2; XM_01…	30 (NM_001167625.1,NM_001129837.1,NM_001129846.1,NM_001129834.1,NM_001129830.3,NM_001129835.1,NM_001129843.1,NM_001129838.1,NM_001129829.1,NM_001129840.2,NM_000719.7,XM_006719017.2); 30-31 (NM_001129839.1); 31 (XM_017019932.2,NM_001129831.1,XM_017019942.2,XM_017019936.2,XM_017019940.2,XM_017019945.2,XM_017019943.2,NM_001129832.1,NM_001129836.1,XM_017019947.2,XM_017019938.2,XM_017019952.2,XM_01152…	958
CACNA1C	CACNA1C_02	CACNA1C	NM_000719.7; NM_001129827.2; NM_001129829.1; NM_001129830.3; NM_001129831.1; NM_001129832.1; NM_001129833.1; NM_001129834.1; NM_001129835.1; NM_001129836.1; NM_001129837.1; NM_001129838.1; NM_001129839.1; NM_001129840.2; NM_001129841.1; NM_001129842.1; NM_001129843.1; NM_001129844.1; NM_001129846.1; NM_001167623.2; NM_001167624.2; NM_001167625.1; NM_199460.3; XM_006719017.2; XM_011521020.2; XM_01…	29 (NM_001129831.1,NM_001167625.1,NM_001129837.1,NM_001129846.1,NM_001129834.1,NM_001129830.3,NM_001129835.1,NM_001129843.1,NM_001129836.1,NM_001129838.1,NM_001129829.1,NM_001129840.2,NM_000719.7,XM_006719017.2,NM_001129839.1,NM_001167623.2,NM_001129844.1,NM_001167624.2,NM_001129842.1,XM_017019953.1,NM_001129833.1,XM_017019954.1,NM_001129841.1); 30 (XM_017019932.2,XM_017019933.2,XM_017019942.2,XM…	959
CACNA1C	CACNA1C_03	CACNA1C	NM_000719.7; NM_001129827.2; NM_001129829.1; NM_001129830.3; NM_001129831.1; NM_001129832.1; NM_001129833.1; NM_001129834.1; NM_001129835.1; NM_001129836.1; NM_001129837.1; NM_001129838.1; NM_001129839.1; NM_001129840.2; NM_001129841.1; NM_001129842.1; NM_001129843.1; NM_001129844.1; NM_001129846.1; NM_001167623.2; NM_001167624.2; NM_001167625.1; NM_199460.3; XM_006719017.2; XM_011521020.2; XM_01…	22-23 (NM_001129831.1,NM_001167625.1,NM_001129837.1,NM_001129846.1,NM_001129834.1,NM_001129830.3,NM_001129835.1,NM_001129843.1,NM_001129836.1,NM_001129838.1,NM_001129829.1,NM_001129840.2,NM_000719.7,XM_006719017.2,NM_001129839.1,NM_001167623.2,NM_001129844.1,NM_001167624.2,NM_001129842.1,XM_017019953.1,NM_001129833.1,XM_017019954.1,NM_001129841.1); 23-24 (XM_017019932.2,XM_017019933.2,XM_01701994…	960
CACNA1C	CACNA1C_04	CACNA1C	NM_000719.7; NM_001129827.2; NM_001129829.1; NM_001129830.3; NM_001129831.1; NM_001129832.1; NM_001129833.1; NM_001129834.1; NM_001129835.1; NM_001129836.1; NM_001129837.1; NM_001129838.1; NM_001129839.1; NM_001129840.2; NM_001129841.1; NM_001129842.1; NM_001129843.1; NM_001129844.1; NM_001129846.1; NM_001167623.2; NM_001167624.2; NM_001167625.1; NM_199460.3; XM_006719017.2; XM_011521020.2; XM_01…	46 (NM_001129837.1,NM_001129846.1,NM_001129838.1,NM_001129839.1); 47 (NM_001167625.1,NM_001129834.1,NM_001129835.1,NM_001129843.1,NM_001129836.1,NM_001129829.1,NM_001129840.2,NM_000719.7,XM_006719017.2,NM_001167623.2,NM_001129844.1,NM_001129842.1,XM_017019953.1,NM_001129833.1,XM_017019954.1,NM_001129841.1); 48 (NM_001129831.1,NM_001129830.3,NM_001129832.1,XM_011521023.3,NM_001167624.2,XM_01152102…	961
CACNA1C	CACNA1C_05	CACNA1C	NM_000719.7; NM_001129827.2; NM_001129829.1; NM_001129830.3; NM_001129831.1; NM_001129832.1; NM_001129833.1; NM_001129834.1; NM_001129835.1; NM_001129836.1; NM_001129837.1; NM_001129838.1; NM_001129839.1; NM_001129840.2; NM_001129841.1; NM_001129842.1; NM_001129843.1; NM_001129844.1; NM_001129846.1; NM_001167623.2; NM_001167624.2; NM_001167625.1; NM_199460.3; XM_006719017.2; XM_011521020.2; XM_01…	46 (NM_001129837.1,NM_001129846.1,NM_001129838.1,NM_001129839.1); 47 (NM_001167625.1,NM_001129834.1,NM_001129835.1,NM_001129843.1,NM_001129836.1,NM_001129829.1,NM_001129840.2,NM_000719.7,XM_006719017.2,NM_001167623.2,NM_001129844.1,NM_001129842.1,XM_017019953.1,NM_001129833.1,XM_017019954.1,NM_001129841.1); 48 (NM_001129831.1,NM_001129830.3,NM_001129832.1,XM_011521023.3,NM_001167624.2,XM_01152102…	962
CACNA1D	CACNA1D_01	CACNA1D	NM_000720.4; NM_001128839.3; NM_001128840.3; XM_005265448.3; XM_011534094.2; XM_011534096.2; XM_011534097.2; XM_011534099.2; XM_011534100.2; XM_017007137.1; XM_017007138.1; XM_017007139.1; XM_017007140.1; XM_017007141.1; XM_017007142.1; XM_017007143.1; XM_017007144.1; XM_017007145.1	34-35 (XM_011534099.2); 35-36 (NM_001128839.3,XM_011534096.2,XM_005265448.3); 36-37 (XM_011534100.2,NM_001128840.3,XM_017007145.1,XM_011534097.2); 37-38 (XM_017007144.1,XM_017007142.1,XM_017007141.1,XM_017007143.1,XM_017007140.1,NM_000720.4); 38-39 (XM_017007138.1,XM_017007137.1,XM_017007139.1,XM_011534094.2)	963
CACNA1D	CACNA1D_02	CACNA1D	NM_000720.4; NM_001128839.3; NM_001128840.3; XM_005265448.3; XM_011534094.2; XM_011534096.2; XM_011534097.2; XM_011534099.2; XM_011534100.2; XM_017007137.1; XM_017007138.1; XM_017007139.1; XM_017007140.1; XM_017007141.1; XM_017007142.1; XM_017007143.1; XM_017007144.1; XM_017007145.1	45 (XM_011534099.2,NM_001128839.3); 46 (XM_011534096.2,XM_005265448.3); 47 (XM_011534100.2,NM_001128840.3,XM_017007145.1,XM_011534097.2); 48 (XM_017007144.1,XM_017007142.1,XM_017007141.1,XM_017007143.1,XM_017007140.1,XM_017007139.1,NM_000720.4); 49 (XM_017007138.1,XM_017007137.1,XM_011534094.2)	964
CACNA1D	CACNA1D_03	CACNA1D	NM_000720.4; NM_001128839.3; NM_001128840.3; XM_005265448.3; XM_011534094.2; XM_011534096.2; XM_011534097.2; XM_011534099.2; XM_011534100.2; XM_017007137.1; XM_017007138.1; XM_017007139.1; XM_017007140.1; XM_017007141.1; XM_017007142.1; XM_017007143.1; XM_017007144.1; XM_017007145.1	23 (XM_011534099.2); 25 (XM_011534097.2); 26 (XM_011534100.2,NM_001128840.3,XM_017007141.1,NM_001128839.3,XM_017007140.1,XM_011534096.2,XM_005265448.3); 27 (XM_017007144.1,XM_017007145.1,XM_017007138.1,XM_017007142.1,XM_017007143.1,XM_017007137.1,XM_017007139.1,XM_011534094.2,NM_000720.4)	965
CACNA1D	CACNA1D_04	CACNA1D	NM_000720.4; NM_001128839.3; NM_001128840.3; XM_011534094.2; XM_011534097.2; XM_011534099.2; XM_011534100.2; XM_017007137.1; XM_017007138.1; XM_017007139.1; XM_017007140.1; XM_017007141.1; XM_017007142.1; XM_017007143.1; XM_017007145.1	46 (XM_011534099.2,NM_001128839.3); 48 (XM_011534100.2,NM_001128840.3,XM_017007145.1,XM_011534097.2); 49 (XM_017007142.1,XM_017007141.1,XM_017007143.1,XM_017007140.1,XM_017007139.1,NM_000720.4); 50 (XM_017007138.1,XM_017007137.1,XM_011534094.2)	966
CACNA1D	CACNA1D_05	CACNA1D	NM_000720.4; NM_001128839.3; NM_001128840.3; XM_011534094.2; XM_011534097.2; XM_011534099.2; XM_011534100.2; XM_017007137.1; XM_017007138.1; XM_017007139.1; XM_017007140.1; XM_017007141.1; XM_017007142.1; XM_017007143.1; XM_017007145.1	46 (XM_011534099.2,NM_001128839.3); 48 (XM_011534100.2,NM_001128840.3,XM_017007145.1,XM_011534097.2); 49 (XM_017007142.1,XM_017007141.1,XM_017007143.1,XM_017007140.1,XM_017007139.1,NM_000720.4); 50 (XM_017007138.1,XM_017007137.1,XM_011534094.2)	967
CACNA1E	CACNA1E_01	CACNA1E	NM_000721.4; NM_001205293.3; NM_001205294.2; XM_017002243.1; XM_017002244.1; XM_017002245.1; XM_017002246.1; XM_017002247.1; XM_017002248.1; XM_017002249.1; XM_017002250.1; XM_017002251.1	46 (NM_001205294.2); 47 (NM_000721.4); 48 (XM_017002250.1,NM_001205293.3); 49 (XM_017002247.1,XM_017002245.1,XM_017002249.1,XM_017002246.1,XM_017002248.1); 50 (XM_017002243.1,XM_017002244.1,XM_017002251.1)	968
CACNA1E	CACNA1E_02	CACNA1E	NM_000721.4; NM_001205293.3; NM_001205294.2; XM_017002243.1; XM_017002244.1; XM_017002245.1; XM_017002246.1; XM_017002247.1; XM_017002248.1; XM_017002249.1; XM_017002250.1; XM_017002251.1	46 (NM_001205294.2); 47 (NM_000721.4); 48 (XM_017002250.1,NM_001205293.3); 49 (XM_017002247.1,XM_017002245.1,XM_017002249.1,XM_017002246.1,XM_017002248.1); 50 (XM_017002243.1,XM_017002244.1,XM_017002251.1)	969
CACNA1E	CACNA1E_03	CACNA1E	NM_000721.4; NM_001205293.3; NM_001205294.2; XM_017002243.1; XM_017002244.1; XM_017002245.1; XM_017002246.1; XM_017002247.1; XM_017002248.1; XM_017002249.1; XM_017002250.1; XM_017002251.1	46 (NM_001205294.2); 47 (NM_000721.4); 48 (XM_017002250.1,NM_001205293.3); 49 (XM_017002247.1,XM_017002245.1,XM_017002249.1,XM_017002246.1,XM_017002248.1); 50 (XM_017002243.1,XM_017002244.1,XM_017002251.1)	970
CACNA1E	CACNA1E_04	CACNA1E	NM_000721.4; NM_001205293.3; NM_001205294.2; XM_017002243.1; XM_017002244.1; XM_017002245.1; XM_017002246.1; XM_017002247.1; XM_017002248.1; XM_017002249.1; XM_017002250.1; XM_017002251.1	46 (NM_001205294.2); 47 (NM_000721.4); 48 (XM_017002250.1,NM_001205293.3); 49 (XM_017002247.1,XM_017002245.1,XM_017002249.1,XM_017002246.1,XM_017002248.1); 50 (XM_017002243.1,XM_017002244.1,XM_017002251.1)	971
CACNA1E	CACNA1E_05	CACNA1E	NM_000721.4; NM_001205293.3; NM_001205294.2; XM_017002243.1; XM_017002244.1; XM_017002245.1; XM_017002246.1; XM_017002247.1; XM_017002248.1; XM_017002249.1; XM_017002250.1; XM_017002251.1	46 (NM_001205294.2); 47 (NM_000721.4); 48 (XM_017002250.1,NM_001205293.3); 49 (XM_017002247.1,XM_017002245.1,XM_017002249.1,XM_017002246.1,XM_017002248.1); 50 (XM_017002243.1,XM_017002244.1,XM_017002251.1)	972
CACNA1G	CACNA1G_01	CACNA1G	NM_001256324.2; NM_001256325.2; NM_001256326.2; NM_001256327.2; NM_001256328.2; NM_001256329.2; NM_001256330.2; NM_001256331.2; NM_001256332.2; NM_001256333.2; NM_001256334.2; NM_001256359.2; NM_001256360.2; NM_001256361.2; NM_018896.5; NM_198376.3; NM_198377.3; NM_198378.3; NM_198379.3; NM_198380.3; NM_198382.2; NM_198383.3; NM_198384.3; NM_198385.3; NM_198386.3; NM_198387.3; NM_198388.3; NM_198…	22 (NM_198383.3,NM_198379.3,NM_198382.2,NM_198396.2,NR_046058.2,NM_198387.3,NM_198376.3,NM_001256332.2,XM_006722161.4,NM_198388.3,XM_006722160.4,NR_046057.2); 23 (NM_001256329.2,NM_001256361.2,NM_018896.5,NM_198384.3,NM_001256328.2,NM_001256333.2,NM_001256360.2,NM_001256326.2,NM_198385.3,NM_198380.3,NR_046054.2,NM_001256324.2,NM_198377.3,NM_001256334.2,NM_198378.3,NR_046055.2,NM_001256359.2,NM_19…	973
CACNA1G	CACNA1G_02	CACNA1G	NM_001256324.2; NM_001256325.2; NM_001256326.2; NM_001256327.2; NM_001256328.2; NM_001256329.2; NM_001256330.2; NM_001256331.2; NM_001256332.2; NM_001256333.2; NM_001256334.2; NM_001256359.2; NM_001256360.2; NM_001256361.2; NM_018896.5; NM_198376.3; NM_198377.3; NM_198378.3; NM_198379.3; NM_198380.3; NM_198382.2; NM_198383.3; NM_198384.3; NM_198385.3; NM_198386.3; NM_198387.3; NM_198388.3; NM_198…	4 (NM_198383.3,NM_198379.3,NM_001256329.2,NM_001256361.2,NM_018896.5,NM_198384.3,NM_001256328.2,NM_001256333.2,NM_198382.2,NM_198396.2,NM_001256360.2,NR_046058.2,NM_198387.3,NM_001256326.2,NM_198376.3,NM_198385.3,NM_001256332.2,NM_198380.3,NR_046054.2,NM_001256324.2,XM_006722161.4,NM_198377.3,NM_001256334.2,NM_198378.3,NR_046055.2,NM_198388.3,NM_001256359.2,XM_006722160.4,NM_198386.3,NR_046056.2,…	974
CACNA1G	CACNA1G_03	CACNA1G	NM_001256324.2; NM_001256325.2; NM_001256326.2; NM_001256327.2; NM_001256328.2; NM_001256329.2; NM_001256330.2; NM_001256331.2; NM_001256332.2; NM_001256333.2; NM_001256334.2; NM_001256359.2; NM_001256360.2; NM_001256361.2; NM_018896.5; NM_198376.3; NM_198377.3; NM_198378.3; NM_198379.3; NM_198380.3; NM_198382.2; NM_198383.3; NM_198384.3; NM_198385.3; NM_198386.3; NM_198387.3; NM_198388.3; NM_198…	4 (NM_198383.3,NM_198379.3,NM_001256329.2,NM_001256361.2,NM_018896.5,NM_198384.3,NM_001256328.2,NM_001256333.2,NM_198382.2,NM_198396.2,NM_001256360.2,NR_046058.2,NM_198387.3,NM_001256326.2,NM_198376.3,NM_198385.3,NM_001256332.2,NM_198380.3,NR_046054.2,NM_001256324.2,XM_006722161.4,NM_198377.3,NM_001256334.2,NM_198378.3,NR_046055.2,NM_198388.3,NM_001256359.2,XM_006722160.4,NM_198386.3,NR_046056.2,…	975
CACNA1G	CACNA1G_04	CACNA1G	NM_001256324.2; NM_001256325.2; NM_001256326.2; NM_001256327.2; NM_001256328.2; NM_001256329.2; NM_001256330.2; NM_001256331.2; NM_001256332.2; NM_001256333.2; NM_001256334.2; NM_001256359.2; NM_001256360.2; NM_001256361.2; NM_018896.5; NM_198376.3; NM_198377.3; NM_198378.3; NM_198379.3; NM_198380.3; NM_198382.2; NM_198383.3; NM_198384.3; NM_198385.3; NM_198386.3; NM_198387.3; NM_198388.3; NM_198…	12 (NM_198383.3,NM_198379.3,NM_001256329.2,NM_001256361.2,NM_018896.5,NM_198384.3,NM_001256328.2,NM_001256333.2,NM_198382.2,NM_198396.2,NM_001256360.2,NR_046058.2,NM_198387.3,NM_001256326.2,NM_198376.3,NM_198385.3,NM_001256332.2,NM_198380.3,NR_046054.2,NM_001256324.2,XM_006722161.4,NM_198377.3,NM_001256334.2,NM_198378.3,NR_046055.2,NM_198388.3,NM_001256359.2,XM_006722160.4,NM_198386.3,NR_046056.2…	976
CACNA1G	CACNA1G_05	CACNA1G	NM_001256324.2; NM_001256325.2; NM_001256326.2; NM_001256327.2; NM_001256328.2; NM_001256329.2; NM_001256330.2; NM_001256331.2; NM_001256332.2; NM_001256333.2; NM_001256334.2; NM_001256359.2; NM_001256360.2; NM_001256361.2; NM_018896.5; NM_198376.3; NM_198377.3; NM_198378.3; NM_198379.3; NM_198380.3; NM_198382.2; NM_198383.3; NM_198384.3; NM_198385.3; NM_198386.3; NM_198387.3; NM_198388.3; NM_198…	3 (NM_198383.3,NM_198379.3,NM_001256329.2,NM_001256361.2,NM_018896.5,NM_198384.3,NM_001256328.2,NM_001256333.2,NM_198382.2,NM_198396.2,NM_001256360.2,NR_046058.2,NM_198387.3,NM_001256326.2,NM_198376.3,NM_198385.3,NM_001256332.2,NM_198380.3,NR_046054.2,NM_001256324.2,XM_006722161.4,NM_198377.3,NM_001256334.2,NM_198378.3,NR_046055.2,NM_198388.3,NM_001256359.2,XM_006722160.4,NM_198386.3,NR_046056.2,…	977
CACNA1H	CACNA1H_01	CACNA1H	NM_001005407.1; NM_021098.3; XM_005255652.4; XM_006720963.3; XM_006720964.3; XM_006720965.3; XM_006720967.3; XM_006720968.3; XM_011522724.2; XM_011522727.3; XM_017023819.1; XM_017023820.1; XM_017023821.1; XR_002957850.1	12-13 (NM_021098.3,XM_006720965.3,XM_006720963.3,XM_006720964.3,XM_011522727.3,XR_002957850.1,XM_017023821.1,XM_017023819.1,XM_017023820.1,XM_006720967.3,XM_005255652.4,NM_001005407.1,XM_006720968.3); 9-10 (XM_011522724.2)	6
CACNA1H	CACNA1H_02	CACNA1H	NM_001005407.1; NM_021098.3; XM_005255652.4; XM_006720963.3; XM_006720964.3; XM_006720965.3; XM_006720967.3; XM_006720968.3; XM_011522724.2; XM_017023819.1; XM_017023820.1; XM_017023821.1	20-21 (XM_011522724.2); 23-24 (NM_021098.3,XM_006720965.3,XM_006720963.3,XM_006720964.3,XM_017023821.1,XM_017023819.1,XM_017023820.1,XM_006720967.3,XM_005255652.4,NM_001005407.1,XM_006720968.3)	978
CACNA1H	CACNA1H_03	CACNA1H	NM_001005407.1; NM_021098.3; XM_005255652.4; XM_006720963.3; XM_006720964.3; XM_006720965.3; XM_011522724.2; XM_017023819.1	31 (XM_011522724.2); 34 (XM_006720965.3,XM_006720963.3,XM_017023819.1,XM_005255652.4,NM_001005407.1); 35 (NM_021098.3,XM_006720964.3)	979
CACNA1H	CACNA1H_04	CACNA1H	NM_001005407.1; NM_021098.3; XM_005255652.4; XM_006720963.3; XM_006720964.3; XM_006720965.3; XM_006720967.3; XM_006720968.3; XM_011522727.3; XM_017023819.1; XM_017023820.1; XM_017023821.1; XR_002957850.1	2-3 (NM_021098.3,XM_006720965.3,XM_006720963.3,XM_006720964.3,XM_011522727.3,XR_002957850.1,XM_017023821.1,XM_017023819.1,XM_017023820.1,XM_006720967.3,XM_005255652.4,NM_001005407.1,XM_006720968.3)	980
CACNA1H	CACNA1H_05	CACNA1H	NM_001005407.1; NM_021098.3; XM_005255652.4; XM_006720963.3; XM_006720964.3; XM_006720965.3; XM_006720967.3; XM_006720968.3; XM_011522724.2; XM_011522727.3; XM_017023819.1; XM_017023820.1; XM_017023821.1; XR_002957850.1	2-3 (XM_011522724.2); 5-6 (NM_021098.3,XM_006720965.3,XM_006720963.3,XM_006720964.3,XM_011522727.3,XR_002957850.1,XM_017023821.1,XM_017023819.1,XM_017023820.1,XM_006720967.3,XM_005255652.4,NM_001005407.1,XM_006720968.3)	981
CACNA2D1	CACNA2D1_01	CACNA2D1	NM_000722.4; NM_001302890.2; NM_001366867.1; XM_005250572.3; XM_005250573.3; XM_005250574.3; XM_006716118.3; XM_006716119.3; XM_006716120.3; XM_011516570.3; XM_011516571.3; XM_011516572.3; XM_017012588.1; XR_001744873.2; XR_001744874.2	10 (XM_006716118.3,XM_006716120.3,XR_001744874.2,XM_011516570.3,XM_005250572.3,XM_011516572.3,NM_001302890.2,XM_005250573.3,XR_001744873.2,XM_011516571.3,NM_000722.4,NM_001366867.1,XM_006716119.3,XM_005250574.3,XM_017012588.1)	982
CACNA2D1	CACNA2D1_02	CACNA2D1	NM_000722.4; NM_001302890.2; NM_001366867.1; XM_005250572.3; XM_005250573.3; XM_005250574.3; XM_006716118.3; XM_006716119.3; XM_006716120.3; XM_011516570.3; XM_011516571.3; XM_011516572.3; XM_017012588.1; XR_001744873.2; XR_001744874.2	6 (XM_006716118.3,XM_006716120.3,XR_001744874.2,XM_011516570.3,XM_005250572.3,XM_011516572.3,NM_001302890.2,XM_005250573.3,XR_001744873.2,XM_011516571.3,NM_000722.4,NM_001366867.1,XM_006716119.3,XM_005250574.3,XM_017012588.1)	983
CACNA2D1	CACNA2D1_03	CACNA2D1	NM_000722.4; NM_001366867.1; XM_005250572.3; XM_005250573.3; XM_005250574.3; XM_006716118.3; XM_006716119.3; XM_006716120.3; XM_006716121.3; XM_011516571.3; XM_011516572.3; XM_017012588.1; XR_001744874.2	22 (XM_006716121.3); 36 (XR_001744874.2); 38 (XM_005250573.3,XM_005250574.3); 39 (XM_005250572.3,XM_011516572.3,NM_000722.4,NM_001366867.1,XM_017012588.1); 40 (XM_006716118.3,XM_006716120.3,XM_011516571.3,XM_006716119.3)	984
CACNA2D1	CACNA2D1_04	CACNA2D1	NM_000722.4; NM_001366867.1; XM_005250572.3; XM_005250573.3; XM_005250574.3; XM_006716118.3; XM_006716119.3; XM_006716120.3; XM_006716121.3; XM_011516571.3; XM_011516572.3; XM_017012588.1; XR_001744874.2	22 (XM_006716121.3); 36 (XR_001744874.2); 38 (XM_005250573.3,XM_005250574.3); 39 (XM_005250572.3,XM_011516572.3,NM_000722.4,NM_001366867.1,XM_017012588.1); 40 (XM_006716118.3,XM_006716120.3,XM_011516571.3,XM_006716119.3)	985
CACNA2D1	CACNA2D1_05	CACNA2D1	NM_000722.4; NM_001366867.1; XM_005250572.3; XM_005250573.3; XM_005250574.3; XM_006716118.3; XM_006716119.3; XM_006716120.3; XM_011516570.3; XM_011516571.3; XM_011516572.3; XM_017012588.1; XR_001744873.2; XR_001744874.2	15-16 (XM_006716118.3,XM_006716120.3,XR_001744874.2,XM_011516570.3,XM_005250572.3,XM_011516572.3,XM_005250573.3,XR_001744873.2,XM_011516571.3,NM_000722.4,NM_001366867.1,XM_006716119.3,XM_005250574.3,XM_017012588.1)	986
CACNA2D2	CACNA2D2_01	CACNA2D2	NM_001005505.3; NM_001174051.3; NM_001291101.1; NM_006030.4; XM_005265581.4; XM_011534243.2	38 (NM_006030.4,NM_001005505.3,XM_005265581.4,NM_001291101.1); 39 (XM_011534243.2,NM_001174051.3)	987
CACNA2D2	CACNA2D2_02	CACNA2D2	NM_001005505.3; NM_001174051.3; NM_001291101.1; NM_006030.4; XM_005265581.4; XM_011534243.2	10-11 (NM_006030.4,NM_001005505.3,XM_011534243.2,NM_001174051.3,XM_005265581.4,NM_001291101.1)	988
CACNA2D2	CACNA2D2_03	CACNA2D2	NM_001005505.3; NM_001174051.3; NM_001291101.1; NM_006030.4; XM_005265581.4; XM_011534243.2	32 (NM_006030.4,NM_001005505.3,XM_005265581.4,NM_001291101.1); 33 (XM_011534243.2,NM_001174051.3)	989
CACNA2D2	CACNA2D2_04	CACNA2D2	NM_001005505.3; NM_001174051.3; NM_001291101.1; NM_006030.4; XM_005265581.4; XM_011534243.2	38 (NM_006030.4,NM_001005505.3,XM_005265581.4,NM_001291101.1); 39 (XM_011534243.2,NM_001174051.3)	990
CACNA2D2	CACNA2D2_05	CACNA2D2	NM_001005505.3; NM_001174051.3; NM_001291101.1; NM_006030.4; XM_005265581.4; XM_011534243.2	13 (NM_006030.4,NM_001005505.3,XM_011534243.2,NM_001174051.3,XM_005265581.4,NM_001291101.1)	991
CACNA2D3	CACNA2D3_01	CACNA2D3	NM_018398.3	6 (NM_018398.3)	992
CACNA2D3	CACNA2D3_02	CACNA2D3	NM_018398.3	8-9 (NM_018398.3)	993
CACNA2D3	CACNA2D3_03	CACNA2D3	NM_018398.3	26-27 (NM_018398.3)	994
CACNA2D3	CACNA2D3_04	CACNA2D3	NM_018398.3	5 (NM_018398.3)	995
CACNA2D3	CACNA2D3_05	CACNA2D3	NM_018398.3	2-3 (NM_018398.3)	996
CACNA2D4	CACNA2D4_01	CACNA2D4	NM_172364.5	38 (NM_172364.5)	997
CACNA2D4	CACNA2D4_02	CACNA2D4	NM_172364.5	38 (NM_172364.5)	998
CACNA2D4	CACNA2D4_03	CACNA2D4	NM_172364.5	38 (NM_172364.5)	999
CACNA2D4	CACNA2D4_04	CACNA2D4	NM_172364.5	38 (NM_172364.5)	1000
CACNA2D4	CACNA2D4_05	CACNA2D4	NM_172364.5	38 (NM_172364.5)	1001
CACNB2	CACNB2_01	CACNB2	NM_000724.4; NM_001167945.2; NM_001330060.2; NM_201570.3; NM_201571.4; NM_201572.4; NM_201590.3; NM_201593.3; NM_201596.3; NM_201597.3; XM_005252588.4; XM_005252591.3; XM_006717502.3; XM_011519659.2; XM_017016625.1; XR_001747198.1	13 (XM_011519659.2,XM_005252588.4,NM_000724.4,NM_201570.3,NM_201590.3,NM_001330060.2,XM_006717502.3); 14 (NM_001167945.2,NM_201571.4,XM_017016625.1,NM_201596.3,NM_201597.3,NM_201593.3,NM_201572.4); 15 (XR_001747198.1); 8 (XM_005252591.3)	1002
CACNB2	CACNB2_02	CACNB2	NM_000724.4; NM_001167945.2; NM_001330060.2; NM_201570.3; NM_201571.4; NM_201572.4; NM_201590.3; NM_201593.3; NM_201596.3; NM_201597.3; XM_005252588.4; XM_005252591.3; XM_006717502.3; XM_011519659.2; XM_017016625.1; XR_001747198.1	13 (XM_011519659.2,XM_005252588.4,NM_000724.4,NM_201570.3,NM_201590.3,NM_001330060.2,XM_006717502.3); 14 (NM_001167945.2,NM_201571.4,XM_017016625.1,NM_201596.3,NM_201597.3,NM_201593.3,NM_201572.4); 15 (XR_001747198.1); 8 (XM_005252591.3)	1003
CACNB2	CACNB2_03	CACNB2	NM_000724.4; NM_001167945.2; NM_001330060.2; NM_201570.3; NM_201571.4; NM_201572.4; NM_201590.3; NM_201593.3; NM_201596.3; NM_201597.3; XM_005252588.4; XM_005252591.3; XM_006717502.3; XM_011519659.2; XM_017016625.1; XR_001747198.1	13 (XM_011519659.2,XM_005252588.4,NM_000724.4,NM_201570.3,NM_201590.3,NM_001330060.2,XM_006717502.3); 14 (NM_001167945.2,NM_201571.4,XM_017016625.1,NM_201596.3,NM_201597.3,NM_201593.3,NM_201572.4); 15 (XR_001747198.1); 8 (XM_005252591.3)	1004
CACNB2	CACNB2_04	CACNB2	NM_000724.4; NM_001167945.2; NM_001330060.2; NM_201570.3; NM_201571.4; NM_201572.4; NM_201590.3; NM_201593.3; NM_201596.3; NM_201597.3; XM_005252588.4; XM_005252591.3; XM_006717502.3; XM_011519659.2; XM_017016625.1; XR_001747198.1	13 (XM_011519659.2,XM_005252588.4,NM_000724.4,NM_201570.3,NM_201590.3,NM_001330060.2,XM_006717502.3); 14 (NM_001167945.2,NM_201571.4,XM_017016625.1,NM_201596.3,NM_201597.3,NM_201593.3,NM_201572.4); 15 (XR_001747198.1); 8 (XM_005252591.3)	1005
CACNB2	CACNB2_05	CACNB2	NM_000724.4; NM_001167945.2; NM_001330060.2; NM_201570.3; NM_201571.4; NM_201572.4; NM_201590.3; NM_201593.3; NM_201596.3; NM_201597.3; XM_005252588.4; XM_005252591.3; XM_006717502.3; XM_011519659.2; XM_017016625.1; XR_001747198.1	13 (XM_011519659.2,XM_005252588.4,NM_000724.4,NM_201570.3,NM_201590.3,NM_001330060.2,XM_006717502.3); 14 (NM_001167945.2,NM_201571.4,XM_017016625.1,NM_201596.3,NM_201597.3,NM_201593.3,NM_201572.4); 15 (XR_001747198.1); 8 (XM_005252591.3)	1006
CACNB3	CACNB3_01	CACNB3	NM_000725.4; NM_001206915.2; NM_001206916.2; NM_001206917.2; XM_011538727.3; XM_011538728.2; XM_017019957.1; XM_024449180.1; XM_024449181.1; XR_001748867.1; XR_001748868.1	7 (NM_001206915.2,XM_024449180.1,XM_024449181.1); 8 (XR_001748867.1,XM_011538728.2,NM_001206916.2,NM_001206917.2,NM_000725.4,XR_001748868.1); 9 (XM_017019957.1,XM_011538727.3)	1007
CACNB3	CACNB3_02	CACNB3	NM_000725.4; NM_001206915.2; NM_001206916.2; NM_001206917.2; XM_011538727.3; XM_011538728.2; XM_017019957.1; XM_024449180.1; XM_024449181.1; XR_001748867.1; XR_001748868.1	10 (NM_001206915.2,XM_024449180.1,XM_024449181.1); 11 (XR_001748867.1,XM_011538728.2,NM_001206916.2,NM_001206917.2,NM_000725.4,XR_001748868.1); 12 (XM_017019957.1,XM_011538727.3)	1008
CACNB3	CACNB3_03	CACNB3	NM_000725.4; NM_001206916.2; NM_001206917.2; XM_011538727.3; XM_011538728.2; XM_017019957.1; XM_024449180.1; XM_024449181.1; XR_001748867.1; XR_001748868.1	3 (XR_001748867.1,XM_011538728.2,XM_024449180.1,NM_001206916.2,NM_001206917.2,XM_024449181.1,NM_000725.4,XR_001748868.1); 4 (XM_017019957.1,XM_011538727.3)	1009
CACNB3	CACNB3_04	CACNB3	NM_000725.4; NM_001206915.2; NM_001206916.2; NM_001206917.2; XM_011538727.3; XM_011538728.2; XM_017019957.1; XM_024449180.1; XM_024449181.1; XR_001748867.1; XR_001748868.1	12 (NM_001206915.2,XM_024449180.1,XM_024449181.1); 13 (XR_001748867.1,XM_011538728.2,NM_001206916.2,NM_001206917.2,NM_000725.4,XR_001748868.1); 14 (XM_017019957.1,XM_011538727.3)	1010
CACNB3	CACNB3_05	CACNB3	NM_000725.4; NM_001206915.2; NM_001206916.2; NM_001206917.2; XM_011538727.3; XM_011538728.2; XM_017019957.1; XR_001748867.1; XR_001748868.1	12 (NM_001206915.2); 13 (XR_001748867.1,XM_011538728.2,NM_001206916.2,NM_001206917.2,NM_000725.4,XR_001748868.1); 14 (XM_017019957.1,XM_011538727.3)	1011
CACNB4	CACNB4_01	CACNB4	NM_000726.5; NM_001005746.4; NM_001005747.4; NM_001145798.2; NM_001320722.3; NM_001330113.2; NM_001330114.2; NM_001330115.2; NM_001330116.2; NM_001330117.2; NM_001330118.1; XM_011511796.2; XM_011511797.3; XM_017004885.1; XM_024453128.1; XR_001738935.1; XR_001738937.2; XR_001738939.1; XR_001738940.2	10 (NM_001330115.2); 11 (XR_001738935.1,XM_011511797.3,NM_001330116.2,NM_001330113.2); 12 (XR_001738937.2,XM_017004885.1,XR_001738939.1); 13 (XM_024453128.1,NM_001005747.4,XR_001738940.2,XM_011511796.2,NM_001330114.2,NM_001145798.2); 14 (NM_001005746.4,NM_001320722.3,NM_001330118.1); 15 (NM_001330117.2)	1012
CACNB4	CACNB4_02	CACNB4	NM_000726.5; NM_001005746.4; NM_001005747.4; NM_001145798.2; NM_001320722.3; NM_001330113.2; NM_001330114.2; NM_001330115.2; NM_001330116.2; NM_001330117.2; NM_001330118.1; XM_011511796.2; XM_011511797.3; XM_017004885.1; XM_024453128.1; XR_001738928.1; XR_001738935.1; XR_001738937.2; XR_001738938.2; XR_001738939.1; XR_001738940.2; XR_002959337.1; XR_002959338.1; XR_923022.3	10 (NM_001330115.2); 11 (XR_001738935.1,XM_011511797.3,NM_001330116.2,NM_001330113.2); 12 (XR_001738937.2,XM_017004885.1,XR_001738939.1); 13 (XM_024453128.1,NM_001005747.4,XR_001738940.2,XM_011511796.2,NM_001330114.2,NM_001145798.2); 14 (NM_001005746.4,NM_001320722.3,NM_001330118.1,XR_002959337.1,XR_001738938.2); 15 (NM_001330117.2,XR_923022.3,XR_002959338.1,XR_001738928.1)	1013
CACNB4	CACNB4_03	CACNB4	NM_000726.5; NM_001005746.4; NM_001005747.4; NM_001145798.2; NM_001320722.3; NM_001330113.2; NM_001330114.2; NM_001330115.2; NM_001330116.2; NM_001330117.2; NM_001330118.1; XM_011511796.2; XM_011511797.3; XM_017004885.1; XM_024453128.1; XR_001738935.1; XR_001738937.2; XR_001738939.1; XR_001738940.2	10 (NM_001330115.2); 11 (XR_001738935.1,XM_011511797.3,NM_001330116.2,NM_001330113.2); 12 (XR_001738937.2,XM_017004885.1,XR_001738939.1); 13 (XM_024453128.1,NM_001005747.4,XR_001738940.2,XM_011511796.2,NM_001330114.2,NM_001145798.2); 14 (NM_001005746.4,NM_001320722.3,NM_001330118.1); 15 (NM_001330117.2)	1014
CACNB4	CACNB4_04	CACNB4	NM_000726.5; NM_001005746.4; NM_001005747.4; NM_001145798.2; NM_001320722.3; NM_001330114.2; NM_001330117.2; NM_001330118.1; XM_011511796.2; XM_017004885.1; XM_017004888.2; XM_024453128.1; XR_001738928.1; XR_001738938.2; XR_002959337.1; XR_002959338.1; XR_923022.3	10-11 (NM_001330117.2); 7-8 (XM_017004885.1); 8 (XM_017004888.2); 8-9 (XM_024453128.1,NM_001005747.4,XM_011511796.2,NM_001330114.2); 9-10 (NM_001005746.4,NM_001145798.2,NM_001320722.3,NM_001330118.1,XR_002959337.1,XR_923022.3,XR_002959338.1,XR_001738938.2,XR_001738928.1)	1015
CACNB4	CACNB4_05	CACNB4	NM_000726.5; NM_001005746.4; NM_001005747.4; NM_001145798.2; NM_001320722.3; NM_001330113.2; NM_001330114.2; NM_001330115.2; NM_001330116.2; NM_001330117.2; NM_001330118.1; XM_011511796.2; XM_011511797.3; XM_017004885.1; XM_024453128.1; XR_001738928.1; XR_001738935.1; XR_001738937.2; XR_001738938.2; XR_001738939.1; XR_001738940.2; XR_002959337.1; XR_002959338.1; XR_923022.3	10 (NM_001330115.2); 11 (XR_001738935.1,XM_011511797.3,NM_001330116.2,NM_001330113.2); 12 (XR_001738937.2,XM_017004885.1,XR_001738939.1); 13 (XM_024453128.1,NM_001005747.4,XR_001738940.2,XM_011511796.2,NM_001330114.2,NM_001145798.2); 14 (NM_001005746.4,NM_001320722.3,NM_001330118.1,XR_002959337.1,XR_001738938.2); 15 (NM_001330117.2,XR_923022.3,XR_002959338.1,XR_001738928.1)	1016
CACNG1	CACNG1_01	CACNG1	NM_000727.4	2-3 (NM_000727.4)	1017
CACNG1	CACNG1_02	CACNG1	NM_000727.4	4 (NM_000727.4)	1018
CACNG1	CACNG1_03	CACNG1	NM_000727.4	4 (NM_000727.4)	1019
CACNG1	CACNG1_04	CACNG1	NM_000727.4	4 (NM_000727.4)	1020
CACNG1	CACNG1_05	CACNG1	NM_000727.4	2-3 (NM_000727.4)	1021
CACNG4	CACNG4_01	CACNG4	NM_014405.4	2 (NM_014405.4)	1022
CACNG4	CACNG4_02	CACNG4	NM_014405.4	4 (NM_014405.4)	1023
CACNG4	CACNG4_03	CACNG4	NM_014405.4	4 (NM_014405.4)	1024
CACNG4	CACNG4_04	CACNG4	NM_014405.4	4 (NM_014405.4)	1025
CACNG4	CACNG4_05	CACNG4	NM_014405.4	4 (NM_014405.4)	1026
CACNG6	CACNG6_01	CACNG6	NM_031897.2; NM_145814.1; NM_145815.1; XM_006723316.3	1 (NM_031897.2,XM_006723316.3,NM_145815.1,NM_145814.1)	1027
CACNG6	CACNG6_02	CACNG6	NM_031897.2; NM_145814.1; NM_145815.1; XM_006723316.3	1 (NM_031897.2,XM_006723316.3,NM_145815.1,NM_145814.1)	1028
CACNG6	CACNG6_03	CACNG6	NM_031897.2; NM_145814.1; NM_145815.1; NR_102308.1	2 (NM_031897.2); 3 (NM_145815.1,NR_102308.1); 4 (NM_145814.1)	1029
CACNG6	CACNG6_04	CACNG6	NM_145814.1; NM_145815.1; NR_102308.1; XM_006723316.3	2-3 (XM_006723316.3,NM_145815.1,NM_145814.1,NR_102308.1)	1030
CACNG6	CACNG6_05	CACNG6	NM_031897.2; NM_145814.1; NM_145815.1; XM_006723316.3	1 (NM_031897.2,XM_006723316.3,NM_145815.1,NM_145814.1)	1031
CALML3	CALML3_01	CALML3	NM_005185.4	1 (NM_005185.4)	1032
CALML3	CALML3_02	CALML3	NM_005185.4	1 (NM_005185.4)	1033
CALML3	CALML3_03	CALML3	NM_005185.4	1 (NM_005185.4)	1034
CALML3	CALML3_04	CALML3	NM_005185.4	1 (NM_005185.4)	1035
CALML5	CALML5_01	CALML5	NM_017422.5	1 (NM_017422.5)	1036
CALML5	CALML5_02	CALML5	NM_017422.5	1 (NM_017422.5)	1037
CALML6	CALML6_01	CALML6	NM_001330313.2; NM_138705.4; XM_005244729.3	2-3 (NM_001330313.2); 3-4 (NM_138705.4,XM_005244729.3)	1038
CALML6	CALML6_02	CALML6	XM_005244729.3	1 (XM_005244729.3)	1039
CALML6	CALML6_03	CALML6	XM_005244729.3	1 (XM_005244729.3)	1040
CALML6	CALML6_04	CALML6	NM_001330313.2; NM_138705.4; XM_005244729.3	2-3 (NM_001330313.2); 3-4 (NM_138705.4,XM_005244729.3)	1041
CAMK2B	CAMK2B_01	CAMK2B	NM_001220.5; NM_001293170.2; NM_172078.3; NM_172079.2; NM_172080.3; NM_172081.3; NM_172082.3; NM_172083.3; NM_172084.3; XM_005249862.3; XM_005249864.3; XM_006715781.2; XM_006715784.2; XM_011515547.1; XM_011515549.1; XM_011515550.1; XM_011515551.1; XM_011515552.1; XM_011515553.1; XM_011515554.1; XM_011515555.1; XM_011515556.1; XM_011515557.1; XM_011515558.2; XM_011515559.2; XM_017012660.1; XM_0170…	4 (XM_017012663.2,NM_172079.2,NM_172078.3,XM_017012661.1,XM_017012669.2,XM_011515547.1,XM_024446945.1,XM_017012668.2,XM_011515550.1,XM_011515551.1,XM_011515552.1,XM_011515558.2,XM_017012670.2,XM_017012662.1,XM_011515556.1,NM_172083.3,XM_011515549.1,XM_017012666.2,XM_017012664.1,XM_017012667.2,XM_017012665.1,XM_006715781.2,XM_011515553.1,XM_005249864.3,XM_006715784.2,NM_001220.5,XM_011515559.2,XM_…	1042
CAMK2B	CAMK2B_02	CAMK2B	NM_001220.5; NM_001293170.2; NM_172078.3; NM_172079.2; NM_172080.3; NM_172081.3; NM_172082.3; NM_172083.3; NM_172084.3; XM_005249862.3; XM_005249864.3; XM_006715781.2; XM_006715784.2; XM_011515547.1; XM_011515549.1; XM_011515550.1; XM_011515551.1; XM_011515552.1; XM_011515553.1; XM_011515554.1; XM_011515555.1; XM_011515556.1; XM_011515557.1; XM_011515558.2; XM_011515559.2; XM_017012660.1; XM_0170…	2 (XM_017012663.2,NM_172079.2,NM_172078.3,XM_017012661.1,XM_017012669.2,XM_011515547.1,XM_024446945.1,XM_017012668.2,XM_011515550.1,XM_011515551.1,XM_011515552.1,XM_011515558.2,XM_017012670.2,XM_017012662.1,XM_011515556.1,NM_172083.3,XM_011515549.1,XM_017012666.2,XM_017012664.1,XM_017012667.2,XM_017012665.1,XM_006715781.2,XM_011515553.1,XM_005249864.3,XM_006715784.2,NM_001220.5,XM_011515559.2,XM_…	1043
CAMK2B	CAMK2B_03	CAMK2B	NM_001220.5; NM_001293170.2; NM_172078.3; NM_172079.2; NM_172080.3; NM_172081.3; NM_172082.3; NM_172083.3; NM_172084.3; XM_005249862.3; XM_005249864.3; XM_006715781.2; XM_006715784.2; XM_011515547.1; XM_011515549.1; XM_011515550.1; XM_011515551.1; XM_011515552.1; XM_011515553.1; XM_011515554.1; XM_011515555.1; XM_011515556.1; XM_011515557.1; XM_011515558.2; XM_011515559.2; XM_017012660.1; XM_0170…	10-11 (XM_017012663.2,NM_172079.2,NM_172078.3,XM_017012661.1,XM_017012669.2,XM_011515547.1,XM_024446945.1,XM_017012668.2,XM_011515550.1,XM_011515551.1,XM_011515552.1,XM_011515558.2,XM_017012670.2,XM_017012662.1,XM_011515556.1,NM_172083.3,XM_011515549.1,XM_017012666.2,XM_017012664.1,XM_017012667.2,XM_017012665.1,XM_006715781.2,XM_011515553.1,XM_005249864.3,XM_006715784.2,NM_001220.5,XM_011515559.2…	1044
CAMK2B	CAMK2B_04	CAMK2B	NM_001220.5; NM_001293170.2; NM_172078.3; NM_172079.2; NM_172080.3; NM_172081.3; NM_172082.3; NM_172083.3; NM_172084.3; XM_005249862.3; XM_005249864.3; XM_006715781.2; XM_006715784.2; XM_011515547.1; XM_011515549.1; XM_011515550.1; XM_011515551.1; XM_011515552.1; XM_011515553.1; XM_011515554.1; XM_011515555.1; XM_011515556.1; XM_011515557.1; XM_011515558.2; XM_011515559.2; XM_017012660.1; XM_0170…	8 (XM_017012663.2,NM_172079.2,NM_172078.3,XM_017012661.1,XM_017012669.2,XM_011515547.1,XM_024446945.1,XM_017012668.2,XM_011515550.1,XM_011515551.1,XM_011515552.1,XM_011515558.2,XM_017012670.2,XM_017012662.1,XM_011515556.1,NM_172083.3,XM_011515549.1,XM_017012666.2,XM_017012664.1,XM_017012667.2,XM_017012665.1,XM_006715781.2,XM_011515553.1,XM_005249864.3,XM_006715784.2,NM_001220.5,XM_011515559.2,XM_…	1045
CAMK2B	CAMK2B_05	CAMK2B	NM_001220.5; NM_172078.3; NM_172079.2; NM_172080.3; NM_172081.3; NM_172082.3; NM_172083.3; NM_172084.3	16 (NM_172084.3); 18 (NM_172083.3); 19 (NM_172081.3); 20 (NM_172079.2,NM_172082.3,NM_172080.3); 21 (NM_172078.3); 24 (NM_001220.5)	1046
CAMP	CAMP_01	CAMP	NM_004345.5	1 (NM_004345.5)	1047
CAMP	CAMP_02	CAMP	NM_004345.5	4 (NM_004345.5)	1048
CAMP	CAMP_03	CAMP	NM_004345.5	2 (NM_004345.5)	1049
CAMP	CAMP_04	CAMP	NM_004345.5	3-4 (NM_004345.5)	1050
CAMP	CAMP_05	CAMP	NM_004345.5	4 (NM_004345.5)	1051
CAPN2	CAPN2_01	CAPN2	NM_001146068.1; NM_001748.5; XR_002957688.1	12-13 (NM_001748.5,XR_002957688.1,NM_001146068.1)	1052
CAPN2	CAPN2_02	CAPN2	NM_001146068.1; NM_001748.5; XR_002957688.1	15-16 (NM_001748.5,XR_002957688.1,NM_001146068.1)	1053
CAPN2	CAPN2_03	CAPN2	NM_001146068.1; NM_001748.5; XR_002957688.1	20 (XR_002957688.1); 21 (NM_001748.5,NM_001146068.1)	1054
CAPN2	CAPN2_04	CAPN2	NM_001146068.1; NM_001748.5; XR_002957688.1	17-18 (XR_002957688.1); 18-19 (NM_001748.5,NM_001146068.1)	1055
CAPN2	CAPN2_05	CAPN2	NM_001146068.1; NM_001748.5; XR_002957688.1	10-12 (NM_001748.5,XR_002957688.1,NM_001146068.1)	1056
CARD11	CARD11_01	CARD11	NM_001324281.2; NM_032415.6	6 (NM_032415.6); 7 (NM_001324281.2)	1057
CARD11	CARD11_02	CARD11	NM_001324281.2; NM_032415.6	22-23 (NM_032415.6); 23-24 (NM_001324281.2)	1058
CARD11	CARD11_03	CARD11	NM_001324281.2; NM_032415.6	10 (NM_001324281.2); 9 (NM_032415.6)	1059
CARD11	CARD11_04	CARD11	NM_001324281.2; NM_032415.6	3 (NM_032415.6); 4 (NM_001324281.2)	1060
CARD11	CARD11_05	CARD11	NM_001324281.2; NM_032415.6	5 (NM_032415.6); 6 (NM_001324281.2)	1061
CARD9	CARD9_01	CARD9	NM_052813.5; NM_052814.4	7 (NM_052814.4,NM_052813.5)	1062
CARD9	CARD9_02	CARD9	NM_052813.5; NM_052814.4	2 (NM_052814.4,NM_052813.5)	1063
CARD9	CARD9_03	CARD9	NM_052813.5; NM_052814.4	3 (NM_052814.4,NM_052813.5)	1064
CARD9	CARD9_04	CARD9	NM_052813.5; NM_052814.4	7 (NM_052814.4,NM_052813.5)	1065
CARD9	CARD9_05	CARD9	NM_052813.5; NM_052814.4	13 (NM_052814.4,NM_052813.5)	1066
CASP1	CASP1_01	CASP1	NM_001223.5; NM_001257118.3; NM_001257119.3; NM_033292.4; NM_033293.4; NM_033294.3; XM_017018393.1; XM_017018394.1; XM_017018395.1; XM_017018396.1	5 (NM_001257119.3,NM_001223.5,NM_033294.3,NM_033293.4,XM_017018395.1); 6 (XM_017018394.1,NM_001257118.3,XM_017018393.1,NM_033292.4,XM_017018396.1)	1067
CASP1	CASP1_02	CASP1	NM_001223.5; NM_001257118.3; NM_001257119.3; NM_033292.4; NM_033293.4; NM_033294.3; XM_017018393.1; XM_017018394.1; XM_017018395.1; XM_017018396.1	5 (NM_001257119.3,NM_001223.5,NM_033294.3,NM_033293.4,XM_017018395.1); 6 (XM_017018394.1,NM_001257118.3,XM_017018393.1,NM_033292.4,XM_017018396.1)	1068
CASP1	CASP1_03	CASP1	NM_001223.5; NM_001257118.3; NM_001257119.3; NM_033292.4; NM_033293.4; NM_033294.3; XM_017018393.1; XM_017018394.1; XM_017018395.1; XM_017018396.1	5 (NM_001257119.3,NM_001223.5,NM_033294.3,NM_033293.4,XM_017018395.1); 6 (XM_017018394.1,NM_001257118.3,XM_017018393.1,NM_033292.4,XM_017018396.1)	1069
CASP1	CASP1_04	CASP1	NM_001223.5; NM_001257118.3; NM_001257119.3; NM_033292.4; NM_033293.4; NM_033294.3; XM_017018393.1; XM_017018394.1; XM_017018395.1; XM_017018396.1	3 (NM_001257119.3,NM_001223.5,NM_033294.3,NM_033293.4,XM_017018395.1); 4 (XM_017018394.1,NM_001257118.3,XM_017018393.1,NM_033292.4,XM_017018396.1)	1070
CASP1	CASP1_05	CASP1	NM_001223.5; NM_001257118.3; NM_001257119.3; NM_033292.4; NM_033293.4; NM_033294.3; XM_017018393.1; XM_017018394.1; XM_017018395.1; XM_017018396.1	4 (NM_001257119.3,NM_001223.5,NM_033294.3,NM_033293.4,XM_017018395.1); 5 (XM_017018394.1,NM_001257118.3,XM_017018393.1,NM_033292.4,XM_017018396.1)	1071
CASP10	CASP10_01	CASP10	NM_001206524.2; NM_001206542.2; NM_001230.5; NM_001306083.2; NM_032974.5; NM_032976.3; NM_032977.4; XM_005246907.2; XM_006712796.3; XM_011511990.2; XR_923043.2; XR_923044.2	3-4 (XR_923044.2,NM_032974.5,XM_005246907.2,NM_001230.5,XR_923043.2,XM_006712796.3,NM_032976.3,NM_001206542.2,XM_011511990.2,NM_032977.4,NM_001306083.2,NM_001206524.2)	1072
CASP10	CASP10_02	CASP10	NM_001206524.2; NM_001206542.2; NM_001230.5; NM_001306083.2; NM_032974.5; NM_032976.3; NM_032977.4; XM_005246907.2; XM_006712796.3; XM_011511990.2; XR_923043.2; XR_923044.2	1-2 (XR_923044.2,NM_032974.5,XM_005246907.2,NM_001230.5,XR_923043.2,XM_006712796.3,NM_032976.3,NM_001206542.2,XM_011511990.2,NM_032977.4,NM_001306083.2,NM_001206524.2)	1073
CASP10	CASP10_03	CASP10	NM_001206524.2; NM_001206542.2; NM_001230.5; NM_001306083.2; NM_032974.5; NM_032976.3; NM_032977.4; XM_005246907.2; XM_006712796.3; XM_011511990.2; XR_923043.2; XR_923044.2	2-3 (XR_923044.2,NM_032974.5,XM_005246907.2,NM_001230.5,XR_923043.2,XM_006712796.3,NM_032976.3,NM_001206542.2,XM_011511990.2,NM_032977.4,NM_001306083.2,NM_001206524.2)	1074
CASP10	CASP10_04	CASP10	NM_001206524.2; NM_001206542.2; NM_001230.5; NM_001306083.2; NM_032974.5; NM_032976.3; NM_032977.4; XM_005246907.2; XM_006712796.3; XM_011511990.2; XR_923043.2; XR_923044.2	5 (XR_923044.2,NM_032974.5,XM_005246907.2,NM_001230.5,XR_923043.2,XM_006712796.3,NM_032976.3,NM_001206542.2,XM_011511990.2,NM_032977.4,NM_001306083.2,NM_001206524.2)	1075
CASP10	CASP10_05	CASP10	NM_001206524.2; NM_001206542.2; NM_001230.5; NM_032974.5; NM_032976.3; NM_032977.4; XM_005246907.2; XM_006712796.3	7 (NM_001230.5,NM_001206542.2,NM_001206524.2); 8 (XM_006712796.3,NM_032976.3); 9 (NM_032974.5,XM_005246907.2,NM_032977.4)	1076
CASP12	CASP12_01	CASP12	NM_001191016.2; NR_034061.2; NR_034063.2; NR_034064.2; NR_034065.2; NR_034066.2; NR_034067.2; NR_034068.2; NR_034070.2; NR_034071.2	4 (NR_034068.2); 5 (NR_034066.2,NR_034067.2); 6 (NR_034064.2,NR_034065.2,NR_034063.2); 7 (NR_034061.2,NR_034071.2); 8 (NR_034070.2)	1077
CASP12	CASP12_02	CASP12	NM_001191016.2; NR_034061.2; NR_034063.2; NR_034064.2; NR_034065.2; NR_034066.2; NR_034067.2; NR_034068.2; NR_034070.2; NR_034071.2	2 (NR_034068.2,NR_034066.2); 3 (NR_034064.2,NR_034061.2,NR_034065.2,NR_034067.2,NR_034063.2); 4 (NR_034070.2,NR_034071.2)	1078
CASP12	CASP12_03	CASP12	NM_001191016.2; NR_034061.2; NR_034063.2; NR_034064.2; NR_034065.2; NR_034066.2; NR_034067.2; NR_034068.2; NR_034070.2; NR_034071.2	3 (NR_034068.2,NR_034066.2); 4 (NR_034065.2,NR_034067.2); 5 (NR_034064.2,NR_034061.2,NR_034063.2,NR_034071.2); 6 (NR_034070.2)	1079
CASP12	CASP12_04	CASP12	NM_001191016.2; NR_034061.2; NR_034063.2; NR_034064.2; NR_034065.2; NR_034066.2; NR_034067.2; NR_034068.2; NR_034070.2; NR_034071.2	4 (NR_034068.2); 5 (NR_034066.2,NR_034067.2); 6 (NR_034064.2,NR_034065.2,NR_034063.2); 7 (NR_034061.2,NR_034071.2); 8 (NR_034070.2)	1080
CASP12	CASP12_05	CASP12	NM_001191016.2; NR_034061.2; NR_034063.2; NR_034064.2; NR_034065.2; NR_034066.2; NR_034067.2; NR_034068.2; NR_034070.2; NR_034071.2	2 (NR_034068.2,NR_034066.2); 3 (NR_034064.2,NR_034061.2,NR_034065.2,NR_034067.2,NR_034063.2); 4 (NR_034070.2,NR_034071.2)	1081
CASP3	CASP3_01	CASP3	NM_001354777.1; NM_001354779.1; NM_001354780.1; NM_001354781.1; NM_001354782.1; NM_001354783.1; NM_001354784.1; NM_004346.4; NM_032991.2	6 (NM_001354781.1,NM_001354784.1); 7 (NM_001354782.1,NM_001354779.1,NM_032991.2); 8 (NM_004346.4,NM_001354780.1,NM_001354783.1,NM_001354777.1)	1082
CASP3	CASP3_02	CASP3	NM_001354777.1; NM_001354779.1; NM_001354780.1; NM_001354781.1; NM_001354782.1; NM_001354783.1; NM_001354784.1; NM_004346.4; NM_032991.2	6 (NM_001354781.1,NM_001354784.1); 7 (NM_001354782.1,NM_001354779.1,NM_032991.2); 8 (NM_004346.4,NM_001354780.1,NM_001354783.1,NM_001354777.1)	1083
CASP3	CASP3_03	CASP3	NM_001354777.1; NM_001354779.1; NM_001354780.1; NM_001354781.1; NM_001354782.1; NM_001354783.1; NM_001354784.1; NM_004346.4; NM_032991.2	6 (NM_001354781.1,NM_001354784.1); 7 (NM_001354782.1,NM_001354779.1,NM_032991.2); 8 (NM_004346.4,NM_001354780.1,NM_001354783.1,NM_001354777.1)	1084
CASP3	CASP3_04	CASP3	NM_001354777.1; NM_001354779.1; NM_001354780.1; NM_001354781.1; NM_001354782.1; NM_001354783.1; NM_001354784.1; NM_004346.4; NM_032991.2	6 (NM_001354781.1,NM_001354784.1); 7 (NM_001354782.1,NM_001354779.1,NM_032991.2); 8 (NM_004346.4,NM_001354780.1,NM_001354783.1,NM_001354777.1)	1085
CASP3	CASP3_05	CASP3	NM_001354777.1; NM_001354779.1; NM_001354780.1; NM_001354781.1; NM_001354782.1; NM_001354783.1; NM_001354784.1; NM_004346.4; NM_032991.2	6 (NM_001354781.1,NM_001354784.1); 7 (NM_001354782.1,NM_001354779.1,NM_032991.2); 8 (NM_004346.4,NM_001354780.1,NM_001354783.1,NM_001354777.1)	1086
CASP7	CASP7_01	CASP7	NM_001227.5; NM_001267056.1; NM_001267057.1; NM_001267058.1; NM_001320911.2; NM_033338.6; NM_033339.5; NM_033340.4; XM_006718017.3; XM_011540260.1; XM_017016763.1; XM_017016764.1	6 (XM_011540260.1,NM_001267058.1); 7 (XM_017016764.1,NM_001267056.1,NM_001227.5,NM_001267057.1,NM_001320911.2,XM_017016763.1); 8 (XM_006718017.3,NM_033340.4,NM_033339.5,NM_033338.6)	1087
CASP7	CASP7_02	CASP7	NM_001227.5; NM_001267056.1; NM_001267057.1; NM_001267058.1; NM_001320911.2; NM_033338.6; NM_033339.5; NM_033340.4; XM_006718017.3; XM_011540260.1; XM_017016763.1; XM_017016764.1	6 (XM_011540260.1,NM_001267058.1); 7 (XM_017016764.1,NM_001267056.1,NM_001227.5,NM_001267057.1,NM_001320911.2,XM_017016763.1); 8 (XM_006718017.3,NM_033340.4,NM_033339.5,NM_033338.6)	1088
CASP7	CASP7_03	CASP7	NM_001227.5; NM_001267056.1; NM_001267057.1; NM_001267058.1; NM_001320911.2; NM_033338.6; NM_033339.5; NM_033340.4; XM_006718017.3; XM_011540260.1; XM_017016763.1; XM_017016764.1	5 (XM_011540260.1,NM_001267058.1); 6 (XM_017016764.1,NM_001267056.1,NM_001227.5,NM_001267057.1,NM_001320911.2,XM_017016763.1); 7 (XM_006718017.3,NM_033340.4,NM_033339.5,NM_033338.6)	1089
CASP7	CASP7_04	CASP7	NM_001227.5; NM_001267056.1; NM_001267057.1; NM_001320911.2; NM_033338.6; NM_033339.5; NM_033340.4; XM_006718017.3; XM_017016763.1; XM_017016764.1	2 (XM_017016764.1,NM_001267056.1,NM_001227.5,NM_001267057.1,NM_001320911.2,NM_033340.4,XM_017016763.1); 3 (XM_006718017.3,NM_033339.5,NM_033338.6)	1090
CASP7	CASP7_05	CASP7	NM_001227.5; NM_001267056.1; NM_001267057.1; NM_001267058.1; NM_001320911.2; NM_033338.6; NM_033339.5; NM_033340.4; XM_006718017.3; XM_011540260.1; XM_017016763.1; XM_017016764.1	6 (XM_011540260.1,NM_001267058.1); 7 (XM_017016764.1,NM_001267056.1,NM_001227.5,NM_001267057.1,NM_001320911.2,XM_017016763.1); 8 (XM_006718017.3,NM_033340.4,NM_033339.5,NM_033338.6)	1091
CASP8	CASP8_01	CASP8	NM_001080124.2; NM_001080125.2; NM_001228.4; NM_001372051.1; NM_033355.3; NM_033356.4; NM_033358.4; NR_111983.2; XM_005246885.2; XM_005246887.2; XM_005246888.2; XM_005246889.2; XM_005246890.4; XM_005246891.5; XM_005246892.2; XM_005246893.3; XM_005246894.4; XM_005246895.3; XM_006712789.2; XM_006712790.4; XM_006712793.3; XM_011511969.2; XR_001738971.1; XR_923035.1	2 (XM_011511969.2); 4 (NM_001080125.2,XM_005246895.3,XM_005246889.2,NR_111983.2,XM_005246893.3,XM_005246890.4,NM_033356.4,XM_005246892.2,XM_005246885.2,NM_001372051.1,XM_005246891.5,XM_006712790.4,XR_923035.1); 5 (XM_006712789.2,XR_001738971.1,XM_005246887.2,XM_005246888.2,XM_006712793.3,XM_005246894.4,NM_001080124.2,NM_033358.4,NM_033355.3); 6 (NM_001228.4)	1092
CASP8	CASP8_02	CASP8	NM_001080124.2; NM_001080125.2; NM_001228.4; NM_001372051.1; NM_033355.3; NM_033356.4; NM_033358.4; NR_111983.2; XM_005246885.2; XM_005246887.2; XM_005246888.2; XM_005246889.2; XM_005246890.4; XM_005246891.5; XM_005246892.2; XM_005246893.3; XM_005246894.4; XM_005246895.3; XM_006712789.2; XM_006712790.4; XM_006712793.3; XM_011511969.2; XR_001738971.1; XR_923035.1	5 (XM_005246895.3,XM_011511969.2); 6 (XM_005246893.3,NM_033356.4,XM_005246892.2,XM_005246885.2,XR_923035.1); 7 (NM_001080125.2,XM_005246889.2,XR_001738971.1,NR_111983.2,XM_005246890.4,XM_006712793.3,XM_005246894.4,NM_001080124.2,NM_001372051.1,XM_005246891.5,NM_033358.4,XM_006712790.4); 8 (NM_001228.4,XM_006712789.2,XM_005246887.2,XM_005246888.2,NM_033355.3)	1093
CASP8	CASP8_03	CASP8	NM_001080124.2; NM_001080125.2; NM_001228.4; NM_001372051.1; NM_033355.3; NM_033356.4; NM_033358.4; NR_111983.2; XM_005246885.2; XM_005246887.2; XM_005246888.2; XM_005246889.2; XM_005246890.4; XM_005246891.5; XM_005246892.2; XM_005246893.3; XM_005246894.4; XM_005246895.3; XM_006712789.2; XM_006712790.4; XM_006712793.3; XM_011511969.2; XR_001738971.1; XR_923035.1	4-5 (XM_005246895.3,XM_011511969.2); 5-6 (XM_005246893.3,NM_033356.4,XM_005246892.2,XM_005246885.2,XR_923035.1); 6-7 (NM_001080125.2,XM_005246889.2,XR_001738971.1,NR_111983.2,XM_005246890.4,XM_006712793.3,XM_005246894.4,NM_001080124.2,NM_001372051.1,XM_005246891.5,NM_033358.4,XM_006712790.4); 7-8 (NM_001228.4,XM_006712789.2,XM_005246887.2,XM_005246888.2,NM_033355.3)	1094
CASP8	CASP8_04	CASP8	NM_001080124.2; NM_001080125.2; NM_001228.4; NM_001372051.1; NM_033355.3; NM_033356.4; NM_033358.4; NR_111983.2; XM_005246885.2; XM_005246887.2; XM_005246888.2; XM_005246889.2; XM_005246890.4; XM_005246891.5; XM_005246892.2; XM_005246893.3; XM_005246894.4; XM_005246895.3; XM_006712789.2; XM_006712790.4; XM_006712793.3; XR_001738971.1; XR_923035.1	2 (NM_001080125.2,XM_005246895.3,XM_005246889.2,NR_111983.2,XM_005246893.3,XM_005246890.4,NM_033356.4,XM_005246892.2,XM_005246885.2,NM_001372051.1,XM_005246891.5,XM_006712790.4,XR_923035.1); 3 (NM_001228.4,XM_006712789.2,XR_001738971.1,XM_005246887.2,XM_005246888.2,XM_006712793.3,XM_005246894.4,NM_001080124.2,NM_033358.4,NM_033355.3)	1095
CASP8	CASP8_05	CASP8	NM_001080124.2; NM_001080125.2; NM_001228.4; NM_001372051.1; NM_033355.3; NM_033356.4; NR_111983.2; XM_005246885.2; XM_005246887.2; XM_005246888.2; XM_005246889.2; XM_005246890.4; XM_005246891.5; XM_005246892.2; XM_005246894.4; XM_006712789.2; XM_006712790.4; XM_011511969.2	6 (XM_011511969.2); 7 (NM_033356.4,XM_005246892.2,XM_005246885.2); 8 (NM_001080125.2,XM_005246889.2,NR_111983.2,XM_005246890.4,XM_005246894.4,NM_001080124.2,NM_001372051.1,XM_005246891.5,XM_006712790.4); 9 (NM_001228.4,XM_006712789.2,XM_005246887.2,XM_005246888.2,NM_033355.3)	1096
CASP9	CASP9_01	CASP9	NM_001229.5; NM_001278054.1; NM_032996.3; NR_102732.1; NR_102733.1; XM_005246014.2; XM_011542273.3	4 (NM_001278054.1); 8 (NR_102732.1,NM_032996.3,NM_001229.5,XM_011542273.3,XM_005246014.2,NR_102733.1)	1097
CASP9	CASP9_02	CASP9	NM_001229.5; NM_001278054.1; NM_032996.3; NR_102732.1; NR_102733.1; XM_005246014.2; XM_011542273.3	2 (NR_102732.1,NM_001278054.1,NM_032996.3,NM_001229.5,XM_011542273.3,XM_005246014.2); 2-3 (NR_102733.1)	1098
CASP9	CASP9_03	CASP9	NM_001229.5; NM_001278054.1; NM_032996.3; NR_102732.1; NR_102733.1; XM_005246014.2	5 (NM_001278054.1); 9 (NR_102732.1,NM_032996.3,NM_001229.5,XM_005246014.2,NR_102733.1)	1099
CASP9	CASP9_04	CASP9	NM_001229.5; NM_032996.3; NR_102732.1; NR_102733.1; XM_005246014.2; XM_011542273.3	4 (NR_102732.1,NM_032996.3,NM_001229.5,XM_011542273.3,XM_005246014.2,NR_102733.1)	1100
CASP9	CASP9_05	CASP9	NM_001229.5; NM_001278054.1; NM_032996.3; NR_102732.1; NR_102733.1; XM_005246014.2	5 (NM_001278054.1); 9 (NR_102732.1,NM_032996.3,NM_001229.5,XM_005246014.2,NR_102733.1)	1101
CBL	CBL_01	CBL	NM_005188.4	2-3 (NM_005188.4)	1102
CBL	CBL_02	CBL	NM_005188.4	6 (NM_005188.4)	1103
CBL	CBL_03	CBL	NM_005188.4	10 (NM_005188.4)	1104
CBL	CBL_04	CBL	NM_005188.4	11 (NM_005188.4)	1105
CBL	CBL_05	CBL	NM_005188.4	10-11 (NM_005188.4)	1106
CBLC	CBLC_01	CBLC	NM_001130852.1; NM_012116.4; XM_005258696.3; XM_011526688.2; XM_011526689.2; XM_011526690.2; XR_243917.3; XR_935783.2	6 (XM_011526689.2,XM_011526690.2,XR_935783.2,NM_001130852.1); 7 (XM_011526688.2,NM_012116.4,XM_005258696.3,XR_243917.3)	1107
CBLC	CBLC_02	CBLC	NM_001130852.1; NM_012116.4; XM_005258696.3; XM_011526688.2; XM_011526689.2; XM_011526690.2; XR_243917.3; XR_935783.2	1 (XM_011526688.2,NM_012116.4,XM_011526689.2,XM_005258696.3,XR_243917.3,XM_011526690.2,XR_935783.2,NM_001130852.1)	1108
CBLC	CBLC_03	CBLC	NM_001130852.1; NM_012116.4; XM_005258696.3; XM_011526688.2; XM_011526689.2; XM_011526690.2; XR_243917.3; XR_935783.2	1 (XM_011526688.2,NM_012116.4,XM_011526689.2,XM_005258696.3,XR_243917.3,XM_011526690.2,XR_935783.2,NM_001130852.1)	1109
CBLC	CBLC_04	CBLC	NM_001130852.1; NM_012116.4; XM_005258696.3; XM_011526688.2; XM_011526689.2; XM_011526690.2; XR_243917.3; XR_935783.2	1 (XM_011526688.2,NM_012116.4,XM_011526689.2,XM_005258696.3,XR_243917.3,XM_011526690.2,XR_935783.2,NM_001130852.1)	1110
CBLC	CBLC_05	CBLC	NM_001130852.1; NM_012116.4; XM_005258696.3; XM_011526688.2; XM_011526689.2; XM_011526690.2; XR_243917.3; XR_935783.2	2 (XM_011526688.2,NM_012116.4,XM_011526689.2,XM_005258696.3,XR_243917.3,XM_011526690.2,XR_935783.2,NM_001130852.1)	1111
CCL1	CCL1_01	CCL1	NM_002981.2	1-2 (NM_002981.2)	1112
CCL1	CCL1_02	CCL1	NM_002981.2	3 (NM_002981.2)	1113
CCL1	CCL1_03	CCL1	NM_002981.2	3 (NM_002981.2)	1114
CCL1	CCL1_04	CCL1	NM_002981.2	1-2 (NM_002981.2)	1115
CCL1	CCL1_05	CCL1	NM_002981.2	3 (NM_002981.2)	1116
CCL11	CCL11_01	CCL11	NM_002986.3	3 (NM_002986.3)	1117
CCL11	CCL11_02	CCL11	NM_002986.3	2 (NM_002986.3)	1118
CCL11	CCL11_03	CCL11	NM_002986.3	3 (NM_002986.3)	1119
CCL11	CCL11_04	CCL11	NM_002986.3	1-2 (NM_002986.3)	1120
CCL11	CCL11_05	CCL11	NM_002986.3	3 (NM_002986.3)	1121
CCL13	CCL13_01	CCL13	NM_005408.3	3 (NM_005408.3)	1122
CCL13	CCL13_02	CCL13	NM_005408.3	3 (NM_005408.3)	1123
CCL13	CCL13_03	CCL13	NM_005408.3	3 (NM_005408.3)	1124
CCL13	CCL13_04	CCL13	NM_005408.3	3 (NM_005408.3)	1125
CCL13	CCL13_05	CCL13	NM_005408.3	3 (NM_005408.3)	1126
CCL14	CCL14_01	CCL14	NM_032962.4; NM_032963.4	3 (NM_032963.4); 4 (NM_032962.4)	1127
CCL14	CCL14_02	CCL14	NM_032963.4	3 (NM_032963.4)	1128
CCL14	CCL14_03	CCL14	NM_032963.4	3 (NM_032963.4)	1129
CCL15	CCL15_01	CCL15	NM_032965.6	4 (NM_032965.6)	1130
CCL16	CCL16_01	CCL16	NM_004590.4; XM_005258020.4	3 (NM_004590.4); 5 (XM_005258020.4)	1131
CCL16	CCL16_02	CCL16	NM_004590.4; XM_005258020.4	1-2 (NM_004590.4); 3-4 (XM_005258020.4)	1132
CCL16	CCL16_03	CCL16	NM_004590.4; XM_005258020.4	1 (NM_004590.4); 3 (XM_005258020.4)	1133
CCL16	CCL16_04	CCL16	NM_004590.4; XM_005258020.4	2-3 (NM_004590.4); 4-5 (XM_005258020.4)	1134
CCL16	CCL16_05	CCL16	NM_004590.4; XM_005258020.4	3 (NM_004590.4); 5 (XM_005258020.4)	1135
CCL17	CCL17_01	CCL17	NM_002987.3; XM_011523256.2; XM_017023530.1	4 (NM_002987.3); 6 (XM_011523256.2,XM_017023530.1)	1136
CCL17	CCL17_02	CCL17	NM_002987.3; XM_011523256.2; XM_017023530.1	4 (NM_002987.3); 6 (XM_011523256.2,XM_017023530.1)	1137
CCL18	CCL18_01	CCL18	NM_002988.4	1 (NM_002988.4)	1138
CCL19	CCL19_01	CCL19	NM_006274.3	2 (NM_006274.3)	1139
CCL19	CCL19_02	CCL19	NM_006274.3	4 (NM_006274.3)	1140
CCL19	CCL19_03	CCL19	NM_006274.3	4 (NM_006274.3)	1141
CCL19	CCL19_04	CCL19	NM_006274.3	2 (NM_006274.3)	1142
CCL2	CCL2_01	CCL2	NM_002982.4	3 (NM_002982.4)	1143
CCL2	CCL2_02	CCL2	NM_002982.4	3 (NM_002982.4)	1144
CCL20	CCL20_01	CCL20	NM_001130046.2; NM_004591.3	3-4 (NM_001130046.2,NM_004591.3)	1145
CCL20	CCL20_02	CCL20	NM_001130046.2; NM_004591.3	1-2 (NM_001130046.2); 2 (NM_004591.3)	1146
CCL20	CCL20_03	CCL20	NM_001130046.2; NM_004591.3	2 (NM_001130046.2,NM_004591.3)	1147
CCL20	CCL20_04	CCL20	NM_001130046.2; NM_004591.3	4 (NM_001130046.2,NM_004591.3)	1148
CCL20	CCL20_05	CCL20	NM_001130046.2; NM_004591.3	2-3 (NM_001130046.2,NM_004591.3)	1149
CCL21	CCL21_01	CCL21	NM_002989.4	2-3 (NM_002989.4)	1150
CCL21	CCL21_02	CCL21	NM_002989.4	1 (NM_002989.4)	1151
CCL21	CCL21_03	CCL21	NM_002989.4	2 (NM_002989.4)	1152
CCL21	CCL21_04	CCL21	NM_002989.4	2 (NM_002989.4)	1153
CCL21	CCL21_05	CCL21	NM_002989.4	2 (NM_002989.4)	1154
CCL22	CCL22_01	CCL22	NM_002990.5	3 (NM_002990.5)	1155
CCL22	CCL22_02	CCL22	NM_002990.5	3 (NM_002990.5)	1156
CCL22	CCL22_03	CCL22	NM_002990.5	3 (NM_002990.5)	1157
CCL22	CCL22_04	CCL22	NM_002990.5	3 (NM_002990.5)	1158
CCL22	CCL22_05	CCL22	NM_002990.5	1 (NM_002990.5)	1159
CCL23	CCL23_01	CCL23	NM_005064.6; NM_145898.4; XR_429910.3	4 (NM_145898.4,XR_429910.3,NM_005064.6)	1160
CCL23	CCL23_02	CCL23	NM_005064.6; NM_145898.4; XR_429910.3	2-3 (NM_145898.4,XR_429910.3,NM_005064.6)	1161
CCL23	CCL23_03	CCL23	NM_005064.6; NM_145898.4; XR_429910.3	2-3 (NM_145898.4); 3 (XR_429910.3,NM_005064.6)	1162
CCL24	CCL24_01	CCL24	NM_001371193.1; NM_002991.3; XM_011516460.2	1 (NM_002991.3); 2 (NM_001371193.1); 3 (XM_011516460.2)	1163
CCL24	CCL24_02	CCL24	NM_001371193.1; NM_002991.3; XM_011516460.2	1-2 (NM_002991.3); 2-3 (NM_001371193.1); 3-4 (XM_011516460.2)	1164
CCL25	CCL25_01	CCL25	NM_001201359.1; NM_005624.3; XM_011528177.2; XM_017027119.1; XM_017027120.1; XM_017027121.1; XM_017027122.1	6 (NM_001201359.1,NM_005624.3); 7 (XM_017027122.1,XM_011528177.2,XM_017027121.1,XM_017027120.1,XM_017027119.1)	1165
CCL25	CCL25_02	CCL25	NM_001201359.1; NM_005624.3; XM_011528177.2; XM_017027119.1; XM_017027120.1; XM_017027121.1; XM_017027122.1	6 (NM_001201359.1,NM_005624.3); 7 (XM_017027122.1,XM_011528177.2,XM_017027121.1,XM_017027120.1,XM_017027119.1)	1166
CCL25	CCL25_03	CCL25	NM_001201359.1; NM_005624.3; XM_011528177.2; XM_017027119.1; XM_017027120.1; XM_017027121.1; XM_017027122.1	1-2 (NM_001201359.1,NM_005624.3); 2-3 (XM_017027122.1,XM_011528177.2,XM_017027121.1,XM_017027120.1,XM_017027119.1)	1167
CCL25	CCL25_04	CCL25	NM_001201359.1; NM_005624.3; XM_011528177.2; XM_017027119.1; XM_017027120.1; XM_017027121.1; XM_017027122.1	4-5 (NM_001201359.1,NM_005624.3); 5-6 (XM_017027122.1,XM_011528177.2,XM_017027121.1,XM_017027120.1,XM_017027119.1)	1168
CCL25	CCL25_05	CCL25	NM_001201359.1; NM_005624.3; XM_011528177.2; XM_017027119.1; XM_017027120.1; XM_017027121.1; XM_017027122.1	6 (NM_001201359.1,NM_005624.3); 7 (XM_017027122.1,XM_011528177.2,XM_017027121.1,XM_017027120.1,XM_017027119.1)	1169
CCL26	CCL26_01	CCL26	NM_001371936.1; NM_001371938.1; NM_006072.4	3 (NM_001371938.1); 4 (NM_001371936.1,NM_006072.4)	1170
CCL26	CCL26_02	CCL26	NM_001371936.1; NM_001371938.1; NM_006072.4	2 (NM_001371938.1); 3 (NM_001371936.1,NM_006072.4)	1171
CCL26	CCL26_03	CCL26	NM_001371936.1; NM_001371938.1; NM_006072.4	1-2 (NM_001371938.1); 2-3 (NM_001371936.1,NM_006072.4)	1172
CCL27	CCL27_01	CCL27	NM_006664.4	2 (NM_006664.4)	1173
CCL27	CCL27_02	CCL27	NM_006664.4	3 (NM_006664.4)	1174
CCL28	CCL28_01	CCL28	NM_001301873.2; NM_001301874.2; NM_001301875.2; NM_148672.3; XR_241706.3; XR_427660.2; XR_925633.2	2-3 (XR_427660.2,XR_241706.3,NM_001301874.2,NM_001301875.2,NM_001301873.2,XR_925633.2,NM_148672.3)	1175
CCL28	CCL28_02	CCL28	NM_001301873.2; NM_001301874.2; NM_001301875.2; NM_148672.3; XR_241706.3; XR_427660.2; XR_925633.2	3 (XR_427660.2,XR_241706.3,NM_001301874.2,NM_001301875.2,NM_001301873.2,XR_925633.2,NM_148672.3)	1176
CCL28	CCL28_03	CCL28	NM_001301873.2; NM_001301874.2; NM_001301875.2; NM_148672.3; XR_241706.3; XR_427660.2; XR_925633.2	3 (XR_427660.2,XR_241706.3,NM_001301874.2,NM_001301875.2,NM_001301873.2,XR_925633.2,NM_148672.3)	1177
CCL28	CCL28_04	CCL28	NM_001301873.2; NM_001301874.2; NM_001301875.2; NM_148672.3; XR_241706.3; XR_427660.2; XR_925633.2	2-3 (XR_427660.2,XR_241706.3,NM_001301874.2,NM_001301875.2,NM_001301873.2,XR_925633.2,NM_148672.3)	1178
CCL28	CCL28_05	CCL28	NM_001301873.2; NM_001301874.2; NM_001301875.2; NM_148672.3; XR_241706.3; XR_427660.2; XR_925633.2	3 (NM_001301875.2,NM_148672.3); 3-4 (XR_427660.2,XR_241706.3,NM_001301874.2,NM_001301873.2,XR_925633.2)	1179
CCL3/L1	CCL3/L1_01	CCL3; CCL3L1; CCL3L3	NM_001001437.4; NM_002983.3; NM_021006.5; NR_111964.1	1 (NM_002983.3)	7
CCL3/L1	CCL3/L1_02	CCL3; CCL3L1; CCL3L3	NM_001001437.4; NM_002983.3; NM_021006.5; NR_111964.1	2 (NM_002983.3)	8
CCL3/L1	CCL3/L1_03	CCL3; CCL3L1; CCL3L3	NM_001001437.4; NM_002983.3; NM_021006.5; NR_111964.1	3 (NM_002983.3)	9
CCL3/L1	CCL3/L1_04	CCL3; CCL3L1; CCL3L3	NM_001001437.4; NM_002983.3; NM_021006.5; NR_111964.1	2 (NM_002983.3)	10
CCL3/L1	CCL3/L1_05	CCL3; CCL3L1; CCL3L3	NM_001001437.4; NM_002983.3; NM_021006.5; NR_111964.1	2-3 (NM_002983.3)	11
CCL4	CCL4_01	CCL4; CCL4L1	NM_002984.4; NM_207007.3	2-3 (NM_002984.4)	1180
CCL4	CCL4_02	CCL4	NM_002984.4	3 (NM_002984.4)	1181
CCL4	CCL4_03	CCL4	NM_002984.4	3 (NM_002984.4)	1182
CCL5	CCL5_01	CCL5	NM_001278736.2; NM_002985.3	2 (NM_001278736.2,NM_002985.3)	1183
CCL5	CCL5_02	CCL5	NM_001278736.2; NM_002985.3	3 (NM_002985.3); 4 (NM_001278736.2)	1184
CCL5	CCL5_03	CCL5	NM_001278736.2; NM_002985.3	3 (NM_002985.3); 4 (NM_001278736.2)	1185
CCL5	CCL5_04	CCL5	NM_001278736.2; NM_002985.3	3 (NM_002985.3); 4 (NM_001278736.2)	1186
CCL5	CCL5_05	CCL5	NM_001278736.2; NM_002985.3	3 (NM_002985.3); 4 (NM_001278736.2)	1187
CCL7	CCL7_01	CCL7	NM_006273.4	3 (NM_006273.4)	1188
CCL7	CCL7_02	CCL7	NM_006273.4	3 (NM_006273.4)	1189
CCL7	CCL7_03	CCL7	NM_006273.4	3 (NM_006273.4)	1190
CCL8	CCL8_01	CCL8	NM_005623.3	3 (NM_005623.3)	1191
CCL8	CCL8_02	CCL8	NM_005623.3	3 (NM_005623.3)	1192
CCL8	CCL8_03	CCL8	NM_005623.3	2 (NM_005623.3)	1193
CCL8	CCL8_04	CCL8	NM_005623.3	1 (NM_005623.3)	1194
CCNA1	CCNA1_01	CCNA1	NM_001111045.1; NM_001111046.1; NM_001111047.1; NM_003914.4; XM_011535294.2; XM_011535295.2; XM_011535296.2	5 (NM_001111045.1,NM_001111047.1,XM_011535296.2,XM_011535294.2,NM_001111046.1,NM_003914.4,XM_011535295.2)	1195
CCNA1	CCNA1_02	CCNA1	NM_001111045.1; NM_001111046.1; NM_001111047.1; NM_003914.4; XM_011535294.2; XM_011535295.2; XM_011535296.2	3 (NM_001111045.1,NM_001111047.1,XM_011535296.2,XM_011535294.2,NM_001111046.1,NM_003914.4,XM_011535295.2)	1196
CCNA1	CCNA1_03	CCNA1	NM_001111045.1; NM_001111046.1; NM_001111047.1; NM_003914.4; XM_011535294.2; XM_011535295.2; XM_011535296.2	6-7 (NM_001111045.1,NM_001111047.1,XM_011535296.2,XM_011535294.2,NM_001111046.1,NM_003914.4,XM_011535295.2)	1197
CCNA1	CCNA1_04	CCNA1	NM_001111045.1; NM_001111046.1; NM_001111047.1; NM_003914.4; XM_011535294.2; XM_011535295.2; XM_011535296.2	8 (NM_001111045.1,NM_001111047.1,XM_011535296.2,XM_011535294.2,NM_001111046.1,NM_003914.4,XM_011535295.2)	1198
CCNA1	CCNA1_05	CCNA1	NM_001111045.1; NM_001111046.1; NM_001111047.1; NM_003914.4; XM_011535294.2; XM_011535295.2; XM_011535296.2	5 (NM_001111045.1,NM_001111047.1,XM_011535296.2,XM_011535294.2,NM_001111046.1,NM_003914.4,XM_011535295.2)	1199
CCNA2	CCNA2_01	CCNA2	NM_001237.5	7 (NM_001237.5)	1200
CCNA2	CCNA2_02	CCNA2	NM_001237.5	3-4 (NM_001237.5)	1201
CCNA2	CCNA2_03	CCNA2	NM_001237.5	4 (NM_001237.5)	1202
CCNA2	CCNA2_04	CCNA2	NM_001237.5	6 (NM_001237.5)	1203
CCNA2	CCNA2_05	CCNA2	NM_001237.5	2-3 (NM_001237.5)	1204
CCNB1	CCNB1_01	CCNB1	NM_001354844.1; NM_001354845.1; NM_031966.4	5 (NM_001354845.1); 6 (NM_031966.4,NM_001354844.1)	1205
CCNB1	CCNB1_02	CCNB1	NM_001354844.1; NM_001354845.1; NM_031966.4	8 (NM_001354845.1,NM_001354844.1); 9 (NM_031966.4)	1206
CCNB1	CCNB1_03	CCNB1	NM_001354844.1; NM_001354845.1; NM_031966.4	5 (NM_001354845.1); 6 (NM_031966.4,NM_001354844.1)	1207
CCNB1	CCNB1_04	CCNB1	NM_001354845.1; NM_031966.4	7 (NM_001354845.1); 8 (NM_031966.4)	1208
CCNB1	CCNB1_05	CCNB1	NM_001354844.1; NM_001354845.1; NM_031966.4	5 (NM_001354845.1); 6 (NM_031966.4,NM_001354844.1)	1209
CCNB3	CCNB3_01	CCNB3	NM_033031.3; XM_017029913.1; XM_017029914.1; XM_017029915.1; XM_017029916.1; XM_017029917.1; XM_024452472.1	5 (XM_024452472.1); 6 (NM_033031.3,XM_017029914.1,XM_017029917.1,XM_017029916.1,XM_017029913.1); 7 (XM_017029915.1)	1210
CCNB3	CCNB3_02	CCNB3	NM_033031.3; XM_017029913.1; XM_017029914.1; XM_017029915.1; XM_017029916.1; XM_017029917.1; XM_024452472.1	5 (XM_024452472.1); 6 (NM_033031.3,XM_017029914.1,XM_017029917.1,XM_017029916.1,XM_017029913.1); 7 (XM_017029915.1)	1211
CCNB3	CCNB3_03	CCNB3	NM_033031.3; XM_017029913.1; XM_017029914.1; XM_017029915.1; XM_017029916.1; XM_017029917.1; XM_024452472.1	5 (XM_024452472.1); 6 (NM_033031.3,XM_017029914.1,XM_017029917.1,XM_017029916.1,XM_017029913.1); 7 (XM_017029915.1)	1212
CCNB3	CCNB3_04	CCNB3	NM_033031.3; XM_017029913.1; XM_017029914.1; XM_017029915.1; XM_017029916.1; XM_017029917.1; XM_024452472.1	5 (XM_024452472.1); 6 (NM_033031.3,XM_017029914.1,XM_017029917.1,XM_017029916.1,XM_017029913.1); 7 (XM_017029915.1)	1213
CCNB3	CCNB3_05	CCNB3	NM_033031.3; XM_017029913.1; XM_017029914.1; XM_017029915.1; XM_017029916.1; XM_017029917.1; XM_024452472.1	6 (XM_024452472.1); 7 (NM_033031.3,XM_017029914.1,XM_017029917.1,XM_017029916.1,XM_017029913.1); 8 (XM_017029915.1)	1214
CCND1	CCND1_01	CCND1	NM_053056.3	1 (NM_053056.3)	1215
CCND1	CCND1_02	CCND1	NM_053056.3	1 (NM_053056.3)	1216
CCND1	CCND1_03	CCND1	NM_053056.3	1 (NM_053056.3)	1217
CCND1	CCND1_04	CCND1	NM_053056.3	3-4 (NM_053056.3)	1218
CCND1	CCND1_05	CCND1	NM_053056.3	4-5 (NM_053056.3)	1219
CCND2	CCND2_01	CCND2	NM_001759.4	5 (NM_001759.4)	1220
CCND2	CCND2_02	CCND2	NM_001759.4	5 (NM_001759.4)	1221
CCND2	CCND2_03	CCND2	NM_001759.4	5 (NM_001759.4)	1222
CCND2	CCND2_04	CCND2	NM_001759.4	5 (NM_001759.4)	1223
CCND2	CCND2_05	CCND2	NM_001759.4	5 (NM_001759.4)	1224
CCND3	CCND3_01	CCND3	NM_001136017.3; NM_001136125.2; NM_001136126.2; NM_001287427.1; NM_001287434.1; NM_001760.5; XM_011514971.2; XM_011514972.1	4 (XM_011514972.1,NM_001136126.2,XM_011514971.2,NM_001136125.2); 5 (NM_001760.5,NM_001136017.3,NM_001287427.1,NM_001287434.1)	1225
CCND3	CCND3_02	CCND3	NM_001136017.3; NM_001136125.2; NM_001136126.2; NM_001287427.1; NM_001287434.1; NM_001760.5; XM_011514971.2; XM_011514972.1	4 (XM_011514972.1,NM_001136126.2,XM_011514971.2,NM_001136125.2); 5 (NM_001760.5,NM_001136017.3,NM_001287427.1,NM_001287434.1)	1226
CCND3	CCND3_03	CCND3	NM_001136017.3; NM_001136125.2; NM_001136126.2; NM_001287427.1; NM_001287434.1; NM_001760.5; XM_011514971.2; XM_011514972.1	4 (XM_011514972.1,NM_001136126.2,XM_011514971.2,NM_001136125.2); 5 (NM_001760.5,NM_001136017.3,NM_001287427.1,NM_001287434.1)	1227
CCND3	CCND3_04	CCND3	NM_001136017.3; NM_001136125.2; NM_001136126.2; NM_001287427.1; NM_001287434.1; NM_001760.5; XM_011514971.2; XM_011514972.1	4 (XM_011514972.1,NM_001136126.2,XM_011514971.2,NM_001136125.2); 5 (NM_001760.5,NM_001136017.3,NM_001287427.1,NM_001287434.1)	1228
CCND3	CCND3_05	CCND3	NM_001136017.3; NM_001136125.2; NM_001136126.2; NM_001287427.1; NM_001287434.1; NM_001760.5; XM_011514971.2; XM_011514972.1	4 (XM_011514972.1,NM_001136126.2,XM_011514971.2,NM_001136125.2); 5 (NM_001760.5,NM_001136017.3,NM_001287427.1,NM_001287434.1)	1229
CCNE1	CCNE1_01	CCNE1	NM_001238.4; NM_001322259.2; NM_001322261.2; NM_001322262.2; XM_011527440.2	4-5 (NM_001322262.2); 5-6 (XM_011527440.2,NM_001322259.2,NM_001238.4,NM_001322261.2)	1230
CCNE1	CCNE1_02	CCNE1	NM_001238.4; NM_001322259.2; NM_001322261.2; NM_001322262.2; XM_011527440.2	4 (NM_001322262.2); 5 (XM_011527440.2,NM_001322259.2,NM_001238.4,NM_001322261.2)	1231
CCNE1	CCNE1_03	CCNE1	NM_001238.4; NM_001322259.2; NM_001322261.2; NM_001322262.2; XM_011527440.2	11 (NM_001322262.2,NM_001322259.2,NM_001322261.2); 12 (XM_011527440.2,NM_001238.4)	1232
CCNE1	CCNE1_04	CCNE1	NM_001238.4; NM_001322259.2; NM_001322261.2; NM_001322262.2; XM_011527440.2	6-7 (NM_001322262.2,NM_001322261.2); 7-8 (XM_011527440.2,NM_001322259.2,NM_001238.4)	1233
CCNE1	CCNE1_05	CCNE1	NM_001238.4; NM_001322259.2; NM_001322261.2; NM_001322262.2; XM_011527440.2	5 (NM_001322262.2); 6 (XM_011527440.2,NM_001322259.2,NM_001238.4,NM_001322261.2)	1234
CCNE2	CCNE2_01	CCNE2	NM_057749.2; XM_011517366.2; XM_017013958.1; XM_017013959.1	5 (XM_011517366.2); 6 (XM_017013958.1,XM_017013959.1,NM_057749.2)	1235
CCNE2	CCNE2_02	CCNE2	NM_057749.2; XM_011517366.2; XM_017013958.1; XM_017013959.1	7 (XM_011517366.2); 8 (XM_017013958.1,XM_017013959.1,NM_057749.2)	1236
CCNE2	CCNE2_03	CCNE2	NM_057749.2; XM_011517366.2; XM_017013958.1; XM_017013959.1	5 (XM_011517366.2); 6 (XM_017013958.1,XM_017013959.1,NM_057749.2)	1237
CCNE2	CCNE2_04	CCNE2	NM_057749.2; XM_011517366.2; XM_017013958.1; XM_017013959.1	8 (XM_011517366.2); 9 (XM_017013958.1,XM_017013959.1,NM_057749.2)	1238
CCNE2	CCNE2_05	CCNE2	NM_057749.2; XM_011517366.2; XM_017013958.1; XM_017013959.1	1 (XM_011517366.2); 1-2 (XM_017013958.1,XM_017013959.1,NM_057749.2)	1239
CCNO	CCNO_01	CCNO	NM_021147.5; NR_125346.1; NR_125347.1; NR_125348.1	2 (NR_125348.1); 3 (NR_125347.1,NM_021147.5,NR_125346.1)	1240
CCNO	CCNO_02	CCNO	NM_021147.5; NR_125346.1; NR_125347.1; NR_125348.1	2 (NR_125348.1); 3 (NR_125347.1,NM_021147.5,NR_125346.1)	1241
CCNO	CCNO_03	CCNO	NM_021147.5; NR_125346.1; NR_125347.1; NR_125348.1	2 (NR_125348.1); 3 (NR_125347.1,NM_021147.5,NR_125346.1)	1242
CCNO	CCNO_04	CCNO	NM_021147.5; NR_125346.1; NR_125347.1; NR_125348.1	1 (NR_125348.1); 2 (NR_125347.1,NM_021147.5,NR_125346.1)	1243
CCR1	CCR1_01	CCR1	NM_001295.3	2 (NM_001295.3)	1244
CCR1	CCR1_02	CCR1	NM_001295.3	2 (NM_001295.3)	1245
CCR1	CCR1_03	CCR1	NM_001295.3	2 (NM_001295.3)	1246
CCR1	CCR1_04	CCR1	NM_001295.3	2 (NM_001295.3)	1247
CCR1	CCR1_05	CCR1	NM_001295.3	2 (NM_001295.3)	1248
CCR2	CCR2_01	CCR2	NM_001123041.2; NM_001123396.4; XM_011534069.1	2 (NM_001123396.4); 3 (XM_011534069.1,NM_001123041.2)	1249
CCR2	CCR2_02	CCR2	NM_001123041.2; NM_001123396.4; XM_011534069.1	2 (NM_001123396.4); 3 (XM_011534069.1,NM_001123041.2)	1250
CCR2	CCR2_03	CCR2	NM_001123396.4; XM_011534069.1	2 (NM_001123396.4); 3 (XM_011534069.1)	1251
CCR2	CCR2_04	CCR2	NM_001123396.4; XM_011534069.1	2 (NM_001123396.4); 3 (XM_011534069.1)	1252
CCR2	CCR2_05	CCR2	NM_001123396.4; XM_011534069.1	2 (NM_001123396.4); 3 (XM_011534069.1)	1253
CCR3	CCR3_01	CCR3	NM_001164680.2; NM_001837.4; NM_178328.1; NM_178329.3; XM_006712960.3; XM_011533335.2; XM_017005685.1; XM_017005686.1	2 (NM_178329.3); 3 (XM_011533335.2,XM_006712960.3,NM_001164680.2,NM_178328.1,NM_001837.4,XM_017005685.1); 4 (XM_017005686.1)	1254
CCR3	CCR3_02	CCR3	NM_001164680.2; NM_001837.4; NM_178328.1; NM_178329.3; XM_006712960.3; XM_011533335.2; XM_017005685.1; XM_017005686.1	2 (NM_178329.3); 3 (XM_011533335.2,XM_006712960.3,NM_001164680.2,NM_178328.1,NM_001837.4,XM_017005685.1); 4 (XM_017005686.1)	1255
CCR3	CCR3_03	CCR3	NM_001164680.2; NM_001837.4; NM_178328.1; NM_178329.3; XM_006712960.3; XM_011533335.2; XM_017005685.1; XM_017005686.1	2 (NM_178329.3); 3 (XM_011533335.2,XM_006712960.3,NM_001164680.2,NM_178328.1,NM_001837.4,XM_017005685.1); 4 (XM_017005686.1)	1256
CCR3	CCR3_04	CCR3	NM_001164680.2; NM_001837.4; NM_178328.1; NM_178329.3; XM_006712960.3; XM_011533335.2; XM_017005685.1; XM_017005686.1	2 (NM_178329.3); 3 (XM_011533335.2,XM_006712960.3,NM_001164680.2,NM_178328.1,NM_001837.4,XM_017005685.1); 4 (XM_017005686.1)	1257
CCR3	CCR3_05	CCR3	NM_001164680.2; NM_001837.4; NM_178328.1; NM_178329.3; XM_006712960.3; XM_011533335.2; XM_017005685.1; XM_017005686.1	2 (NM_178329.3); 3 (XM_011533335.2,XM_006712960.3,NM_001164680.2,NM_178328.1,NM_001837.4,XM_017005685.1); 4 (XM_017005686.1)	1258
CCR4	CCR4_01	CCR4	NM_005508.5; XM_017005687.1	2 (NM_005508.5,XM_017005687.1)	1259
CCR4	CCR4_02	CCR4	NM_005508.5; XM_017005687.1	2 (NM_005508.5,XM_017005687.1)	1260
CCR4	CCR4_03	CCR4	NM_005508.5; XM_017005687.1	2 (NM_005508.5,XM_017005687.1)	1261
CCR4	CCR4_04	CCR4	NM_005508.5; XM_017005687.1	2 (NM_005508.5,XM_017005687.1)	1262
CCR4	CCR4_05	CCR4	NM_005508.5; XM_017005687.1	2 (NM_005508.5,XM_017005687.1)	1263
CCR5	CCR5_01	CCR5	NM_000579.3; NM_001100168.1	3 (NM_001100168.1,NM_000579.3)	1264
CCR5	CCR5_02	CCR5	NM_000579.3; NM_001100168.1	3 (NM_001100168.1,NM_000579.3)	1265
CCR5	CCR5_03	CCR5	NM_000579.3; NM_001100168.1	3 (NM_001100168.1,NM_000579.3)	1266
CCR5	CCR5_04	CCR5	NM_000579.3; NM_001100168.1	3 (NM_001100168.1,NM_000579.3)	1267
CCR5	CCR5_05	CCR5	NM_000579.3; NM_001100168.1	3 (NM_001100168.1,NM_000579.3)	1268
CCR6	CCR6_01	CCR6	NM_004367.5; NM_031409.3	3 (NM_004367.5,NM_031409.3)	1269
CCR6	CCR6_02	CCR6	NM_004367.5; NM_031409.3	3 (NM_004367.5,NM_031409.3)	1270
CCR6	CCR6_03	CCR6	NM_004367.5; NM_031409.3	3 (NM_004367.5,NM_031409.3)	1271
CCR6	CCR6_04	CCR6	NM_004367.5; NM_031409.3	3 (NM_004367.5,NM_031409.3)	1272
CCR6	CCR6_05	CCR6	NM_004367.5; NM_031409.3	3 (NM_004367.5,NM_031409.3)	1273
CCR7	CCR7_01	CCR7	NM_001301714.2; NM_001301716.1; NM_001301717.1; NM_001301718.1; NM_001838.4	2 (NM_001301714.2); 3 (NM_001301718.1,NM_001301716.1,NM_001301717.1,NM_001838.4)	1274
CCR7	CCR7_02	CCR7	NM_001301714.2; NM_001301716.1; NM_001301717.1; NM_001301718.1; NM_001838.4	2 (NM_001301714.2); 3 (NM_001301718.1,NM_001301716.1,NM_001301717.1,NM_001838.4)	1275
CCR7	CCR7_03	CCR7	NM_001301714.2; NM_001301716.1; NM_001301717.1; NM_001301718.1; NM_001838.4	2 (NM_001301714.2); 3 (NM_001301718.1,NM_001301716.1,NM_001301717.1,NM_001838.4)	1276
CCR7	CCR7_04	CCR7	NM_001301714.2; NM_001301716.1; NM_001301717.1; NM_001301718.1; NM_001838.4	2 (NM_001301714.2); 3 (NM_001301718.1,NM_001301716.1,NM_001301717.1,NM_001838.4)	1277
CCR7	CCR7_05	CCR7	NM_001301714.2; NM_001301716.1; NM_001301717.1; NM_001301718.1; NM_001838.4	2 (NM_001301714.2); 3 (NM_001301718.1,NM_001301716.1,NM_001301717.1,NM_001838.4)	1278
CCR9	CCR9_01	CCR9	NM_001256369.1; NM_006641.4; NM_031200.3; XM_011533312.2	2 (NM_006641.4); 3 (XM_011533312.2,NM_031200.3); 4 (NM_001256369.1)	1279
CCR9	CCR9_02	CCR9	NM_001256369.1; NM_006641.4; NM_031200.3; XM_011533312.2	2 (NM_006641.4); 3 (XM_011533312.2,NM_031200.3); 4 (NM_001256369.1)	1280
CCR9	CCR9_03	CCR9	NM_001256369.1; NM_006641.4; NM_031200.3; XM_011533312.2	2 (NM_006641.4); 3 (XM_011533312.2,NM_031200.3); 4 (NM_001256369.1)	1281
CCR9	CCR9_04	CCR9	NM_001256369.1; NM_006641.4; NM_031200.3; XM_011533312.2	2 (NM_006641.4); 3 (XM_011533312.2,NM_031200.3); 4 (NM_001256369.1)	1282
CCR9	CCR9_05	CCR9	NM_001256369.1; NM_006641.4; NM_031200.3; XM_011533312.2	2 (NM_006641.4); 3 (XM_011533312.2,NM_031200.3); 4 (NM_001256369.1)	1283
CCRL2	CCRL2_01	CCRL2	NM_001130910.2; NM_003965.5; XM_011534208.1; XM_011534209.1; XM_017007436.1	2 (XM_017007436.1,NM_001130910.2,NM_003965.5); 3 (XM_011534209.1,XM_011534208.1)	1284
CCRL2	CCRL2_02	CCRL2	NM_001130910.2; NM_003965.5; XM_011534208.1; XM_011534209.1; XM_017007436.1	2 (XM_017007436.1,NM_001130910.2,NM_003965.5); 3 (XM_011534209.1,XM_011534208.1)	1285
CCRL2	CCRL2_03	CCRL2	NM_001130910.2; NM_003965.5; XM_011534208.1; XM_011534209.1; XM_017007436.1	2 (XM_017007436.1,NM_001130910.2,NM_003965.5); 3 (XM_011534209.1,XM_011534208.1)	1286
CCRL2	CCRL2_04	CCRL2	NM_001130910.2; NM_003965.5; XM_011534208.1; XM_011534209.1; XM_017007436.1	2 (XM_017007436.1,NM_001130910.2,NM_003965.5); 3 (XM_011534209.1,XM_011534208.1)	1287
CCRL2	CCRL2_05	CCRL2	NM_001130910.2; NM_003965.5; XM_011534208.1; XM_011534209.1; XM_017007436.1	2 (XM_017007436.1,NM_001130910.2,NM_003965.5); 3 (XM_011534209.1,XM_011534208.1)	1288
CD14	CD14_01	CD14	NM_000591.4; NM_001040021.3; NM_001174104.1; NM_001174105.2	2 (NM_000591.4); 3 (NM_001174104.1,NM_001040021.3,NM_001174105.2)	1289
CD14	CD14_02	CD14	NM_000591.4; NM_001040021.3; NM_001174104.1; NM_001174105.2	2 (NM_000591.4); 3 (NM_001174104.1,NM_001040021.3,NM_001174105.2)	1290
CD14	CD14_03	CD14	NM_000591.4; NM_001040021.3; NM_001174104.1; NM_001174105.2	2 (NM_000591.4); 3 (NM_001174104.1,NM_001040021.3,NM_001174105.2)	1291
CD14	CD14_04	CD14	NM_000591.4; NM_001040021.3; NM_001174104.1; NM_001174105.2	2 (NM_000591.4); 3 (NM_001174104.1,NM_001040021.3,NM_001174105.2)	1292
CD14	CD14_05	CD14	NM_000591.4; NM_001040021.3; NM_001174104.1; NM_001174105.2	2 (NM_000591.4); 3 (NM_001174104.1,NM_001040021.3,NM_001174105.2)	1293
CD160	CD160_01	CD160	NM_007053.4; XM_005272929.3; XM_011509104.2	3 (XM_005272929.3); 4 (XM_011509104.2,NM_007053.4)	1294
CD160	CD160_02	CD160	NM_007053.4; NR_103845.2; XM_005272929.3; XM_011509104.2	3 (NR_103845.2); 4 (XM_005272929.3); 5 (XM_011509104.2,NM_007053.4)	1295
CD160	CD160_03	CD160	NM_007053.4; XM_005272929.3; XM_011509104.2	3 (XM_005272929.3); 4 (XM_011509104.2,NM_007053.4)	1296
CD160	CD160_04	CD160	NM_007053.4; NR_103845.2; XM_005272929.3; XM_011509104.2	3 (NR_103845.2); 4 (XM_005272929.3); 5 (XM_011509104.2,NM_007053.4)	1297
CD160	CD160_05	CD160	XM_005272929.3; XM_011509104.2	1 (XM_011509104.2,XM_005272929.3)	1298
CD163	CD163_01	CD163	NM_001370145.1; NM_001370146.1; NM_004244.5; NM_203416.3; NR_163255.1; XM_024449278.1; XR_002957389.1	7 (XM_024449278.1); 8 (NM_004244.5,NM_203416.3,NR_163255.1,NM_001370146.1,NM_001370145.1,XR_002957389.1)	1299
CD163	CD163_02	CD163	NM_001370145.1; NM_001370146.1; NM_004244.5; NM_203416.3; NR_163255.1; XM_024449278.1; XR_002957389.1	5 (NM_004244.5,XM_024449278.1,NM_203416.3,NR_163255.1,NM_001370146.1,NM_001370145.1,XR_002957389.1)	1300
CD163	CD163_03	CD163	NM_001370145.1; NM_001370146.1; NM_004244.5; NM_203416.3; NR_163255.1; XM_024449278.1; XR_002957389.1	3 (NM_004244.5,XM_024449278.1,NM_203416.3,NR_163255.1,NM_001370146.1,NM_001370145.1,XR_002957389.1)	1301
CD163	CD163_04	CD163	NM_001370145.1; NM_001370146.1; NM_004244.5; NM_203416.3; NR_163255.1; XM_024449278.1; XR_002957389.1	4 (NM_004244.5,XM_024449278.1,NM_203416.3,NR_163255.1,NM_001370146.1,NM_001370145.1,XR_002957389.1)	1302
CD163	CD163_05	CD163	NM_001370145.1; NM_001370146.1; NM_004244.5; NM_203416.3; NR_163255.1; XM_024449278.1; XR_002957389.1	7 (NM_004244.5,XM_024449278.1,NM_203416.3,NR_163255.1,NM_001370146.1,NM_001370145.1,XR_002957389.1)	1303
CD164	CD164_01	CD164	NM_001142401.2; NM_001142402.2; NM_001142403.3; NM_001142404.2; NM_001346500.2; NM_006016.6	2-3 (NM_006016.6,NM_001142403.3,NM_001346500.2,NM_001142401.2,NM_001142402.2,NM_001142404.2)	1304
CD164	CD164_02	CD164	NM_001142401.2; NM_001142402.2; NM_001142403.3; NM_001142404.2; NM_001346500.2; NM_006016.6	5 (NM_001142401.2,NM_001142402.2); 6 (NM_006016.6,NM_001346500.2,NM_001142404.2); 7 (NM_001142403.3)	1305
CD164	CD164_03	CD164	NM_001142401.2; NM_001142402.2; NM_001142403.3; NM_001142404.2; NM_006016.6	1 (NM_006016.6,NM_001142403.3,NM_001142401.2,NM_001142402.2,NM_001142404.2)	1306
CD164	CD164_04	CD164	NM_001142401.2; NM_001142402.2; NM_001142403.3; NM_001346500.2; NM_006016.6	5 (NM_001142401.2,NM_001142402.2); 6 (NM_006016.6,NM_001142403.3,NM_001346500.2)	1307
CD164	CD164_05	CD164	NM_001142401.2; NM_001142402.2; NM_001142403.3; NM_001142404.2; NM_001346500.2; NM_006016.6	5 (NM_001142401.2,NM_001142402.2); 6 (NM_006016.6,NM_001346500.2,NM_001142404.2); 7 (NM_001142403.3)	1308
CD180	CD180_01	CD180	NM_005582.3	1 (NM_005582.3)	1309
CD180	CD180_02	CD180	NM_005582.3; XM_005248504.4	3 (NM_005582.3); 4 (XM_005248504.4)	1310
CD180	CD180_03	CD180	NM_005582.3; XM_005248504.4	3 (NM_005582.3); 4 (XM_005248504.4)	1311
CD180	CD180_04	CD180	NM_005582.3; XM_005248504.4	3 (NM_005582.3); 4 (XM_005248504.4)	1312
CD180	CD180_05	CD180	NM_005582.3; XM_005248504.4	3 (NM_005582.3); 4 (XM_005248504.4)	1313
CD19	CD19_01	CD19	NM_001178098.2; NM_001770.6; XM_006721103.3; XM_011545981.2; XM_017023893.1; XR_950871.2	4 (XM_006721103.3,XM_017023893.1); 5 (NM_001770.6,XM_011545981.2,NM_001178098.2,XR_950871.2)	1314
CD19	CD19_02	CD19	NM_001178098.2; NM_001770.6; XM_006721103.3; XM_017023893.1	10 (XM_006721103.3,XM_017023893.1); 11 (NM_001770.6,NM_001178098.2)	1315
CD19	CD19_03	CD19	NM_001178098.2; NM_001770.6; XM_006721103.3; XM_017023893.1	14 (XM_006721103.3,XM_017023893.1); 15 (NM_001770.6,NM_001178098.2)	1316
CD19	CD19_04	CD19	NM_001178098.2; NM_001770.6; XM_006721103.3; XM_011545981.2; XM_017023893.1; XR_950871.2	3 (XM_006721103.3,XM_017023893.1); 4 (NM_001770.6,XM_011545981.2,NM_001178098.2,XR_950871.2)	1317
CD1A	CD1A_01	CD1A	NM_001320652.2; XM_024450738.1	1-2 (NM_001320652.2,XM_024450738.1)	1318
CD1A	CD1A_02	CD1A	NM_001320652.2; NM_001763.3; XM_024450738.1	2 (NM_001320652.2,NM_001763.3); 3 (XM_024450738.1)	1319
CD1A	CD1A_03	CD1A	NM_001320652.2; NM_001763.3; XM_024450738.1	3 (NM_001320652.2,NM_001763.3); 4 (XM_024450738.1)	1320
CD1A	CD1A_04	CD1A	NM_001320652.2; NM_001763.3; XM_024450738.1	5-6 (NM_001320652.2,NM_001763.3); 6-7 (XM_024450738.1)	1321
CD1A	CD1A_05	CD1A	NM_001320652.2; NM_001763.3; XM_024450738.1	6 (NM_001320652.2,NM_001763.3); 7 (XM_024450738.1)	1322
CD1B	CD1B_01	CD1B	NM_001764.3; XM_011510119.3; XM_017002784.2; XM_017002785.2; XM_017002786.2	2 (XM_017002785.2,NM_001764.3,XM_017002784.2,XM_017002786.2,XM_011510119.3)	1323
CD1B	CD1B_02	CD1B	NM_001764.3; XM_011510119.3; XM_017002784.2; XM_017002785.2; XM_017002786.2	2 (XM_017002785.2,NM_001764.3,XM_017002784.2,XM_017002786.2,XM_011510119.3)	1324
CD1B	CD1B_03	CD1B	NM_001764.3; XM_011510119.3; XM_017002786.2	3-4 (XM_017002786.2); 5-6 (NM_001764.3,XM_011510119.3)	1325
CD1B	CD1B_04	CD1B	NM_001764.3; XM_011510119.3; XM_017002784.2; XM_017002785.2; XM_017002786.2	2-3 (XM_017002785.2,NM_001764.3,XM_017002784.2,XM_017002786.2,XM_011510119.3)	1326
CD1B	CD1B_05	CD1B	NM_001764.3; XM_011510119.3; XM_017002784.2; XM_017002785.2; XM_017002786.2	2 (XM_017002785.2,NM_001764.3,XM_017002784.2,XM_017002786.2,XM_011510119.3)	1327
CD1C	CD1C_01	CD1C	NM_001765.3; XM_005245579.5	1-2 (XM_005245579.5,NM_001765.3)	1328
CD1C	CD1C_02	CD1C	NM_001765.3; XM_005245579.5	3 (XM_005245579.5,NM_001765.3)	1329
CD1C	CD1C_03	CD1C	NM_001765.3; XM_005245579.5	5 (XM_005245579.5); 6 (NM_001765.3)	1330
CD1C	CD1C_04	CD1C	NM_001765.3; XM_005245579.5	3 (XM_005245579.5,NM_001765.3)	1331
CD1C	CD1C_05	CD1C	NM_001765.3; XM_005245579.5	5 (XM_005245579.5); 6 (NM_001765.3)	1332
CD1D	CD1D_01	CD1D	NM_001319145.2; NM_001371762.2; NM_001766.3	5 (NM_001319145.2); 6 (NM_001371762.2); 7 (NM_001766.3)	1333
CD1D	CD1D_02	CD1D	NM_001766.3	1 (NM_001766.3)	1334
CD1D	CD1D_03	CD1D	NM_001319145.2; NM_001371762.2; NM_001766.3	5 (NM_001319145.2); 6 (NM_001371762.2); 7 (NM_001766.3)	1335
CD1D	CD1D_04	CD1D	NM_001319145.2; NM_001371762.2; NM_001766.3	5 (NM_001319145.2); 6 (NM_001371762.2); 7 (NM_001766.3)	1336
CD1D	CD1D_05	CD1D	NM_001319145.2; NM_001371762.2; NM_001766.3	5 (NM_001319145.2); 6 (NM_001371762.2); 7 (NM_001766.3)	1337
CD1E	CD1E_01	CD1E	NM_001042583.3; NM_001042584.3; NM_001042585.3; NM_001042586.3; NM_001042587.3; NM_001185107.2; NM_001185108.2; NM_001185110.2; NM_001185112.2; NM_001185113.2; NM_001185114.1; NM_001185115.2; NM_030893.4; XM_011510133.3; XM_011510134.3	4 (NM_001042587.3,NM_001042586.3,NM_001185110.2,NM_001185112.2,NM_001185113.2); 5 (NM_001185114.1,NM_001185108.2,NM_001185107.2,NM_001185115.2); 6 (XM_011510134.3,XM_011510133.3,NM_001042585.3,NM_001042584.3,NM_030893.4,NM_001042583.3)	1338
CD1E	CD1E_02	CD1E	NM_001042583.3; NM_001042584.3; NM_001042585.3; NM_001042586.3; NM_001042587.3; NM_001185107.2; NM_001185108.2; NM_001185110.2; NM_001185112.2; NM_001185113.2; NM_001185114.1; NM_001185115.2; NM_030893.4; XM_011510133.3; XM_011510134.3	1 (XM_011510134.3,XM_011510133.3,NM_001185114.1,NM_001042587.3,NM_001042585.3,NM_001042586.3,NM_001042584.3,NM_030893.4,NM_001185108.2,NM_001185107.2,NM_001185110.2,NM_001042583.3,NM_001185112.2,NM_001185113.2,NM_001185115.2)	1339
CD1E	CD1E_03	CD1E	NM_001042583.3; NM_001042584.3; NM_001042585.3; NM_001042586.3; NM_001042587.3; NM_001185107.2; NM_001185108.2; NM_001185110.2; NM_001185112.2; NM_001185113.2; NM_001185114.1; NM_001185115.2; NM_030893.4; XM_011510133.3; XM_011510134.3	4 (NM_001042587.3,NM_001042586.3,NM_001185110.2,NM_001185112.2,NM_001185113.2); 5 (NM_001185114.1,NM_001185108.2,NM_001185107.2,NM_001185115.2); 6 (XM_011510134.3,XM_011510133.3,NM_001042585.3,NM_001042584.3,NM_030893.4,NM_001042583.3)	1340
CD1E	CD1E_04	CD1E	NM_001042583.3; NM_001042584.3; NM_001042585.3; NM_001042586.3; NM_001042587.3; NM_001185107.2; NM_001185108.2; NM_001185110.2; NM_001185112.2; NM_001185113.2; NM_001185114.1; NM_001185115.2; NM_030893.4; XM_011510133.3; XM_011510134.3	4 (NM_001042587.3,NM_001042586.3,NM_001185110.2,NM_001185112.2,NM_001185113.2); 5 (NM_001185114.1,NM_001185108.2,NM_001185107.2,NM_001185115.2); 6 (XM_011510134.3,XM_011510133.3,NM_001042585.3,NM_001042584.3,NM_030893.4,NM_001042583.3)	1341
CD1E	CD1E_05	CD1E	NM_001042583.3; NM_001042584.3; NM_001042585.3; NM_001042586.3; NM_001042587.3; NM_001185107.2; NM_001185108.2; NM_001185110.2; NM_001185112.2; NM_001185113.2; NM_001185114.1; NM_001185115.2; NM_030893.4; XM_011510133.3; XM_011510134.3	4 (NM_001042587.3,NM_001042586.3,NM_001185110.2,NM_001185112.2,NM_001185113.2); 5 (NM_001185114.1,NM_001185108.2,NM_001185107.2,NM_001185115.2); 6 (XM_011510134.3,XM_011510133.3,NM_001042585.3,NM_001042584.3,NM_030893.4,NM_001042583.3)	1342
CD2	CD2_01	CD2	NM_001328609.2; NM_001767.5	2 (NM_001767.5,NM_001328609.2)	1343
CD2	CD2_02	CD2	NM_001328609.2; NM_001767.5	5 (NM_001767.5,NM_001328609.2)	1344
CD2	CD2_03	CD2	NM_001328609.2; NM_001767.5	1-2 (NM_001767.5,NM_001328609.2)	1345
CD2	CD2_04	CD2	NM_001328609.2; NM_001767.5	5 (NM_001767.5,NM_001328609.2)	1346
CD2	CD2_05	CD2	NM_001328609.2; NM_001767.5	3 (NM_001767.5,NM_001328609.2)	1347
CD200	CD200_01	CD200	NM_001004196.3; NM_001318826.1; NM_001318828.1; NM_001318830.1; NM_001365851.2; NM_001365852.1; NM_001365853.1; NM_001365854.1; NM_001365855.1; NM_005944.7; NR_158642.1	2 (NM_001318828.1,NM_001318830.1); 3 (NM_001365855.1,NM_005944.7,NM_001365851.2,NM_001365853.1,NM_001318826.1); 4 (NM_001365852.1,NM_001004196.3,NM_001365854.1,NR_158642.1)	1348
CD200	CD200_02	CD200	NM_001004196.3; NM_001318826.1; NM_001318828.1; NM_001318830.1; NM_001365851.2; NM_001365852.1; NM_001365853.1; NM_001365854.1; NM_001365855.1; NM_005944.7; NR_158642.1	2 (NM_001318828.1,NM_001318830.1); 3 (NM_001365855.1,NM_005944.7,NM_001365851.2,NM_001365853.1,NM_001318826.1); 4 (NM_001365852.1,NM_001004196.3,NM_001365854.1,NR_158642.1)	1349
CD200	CD200_03	CD200	NM_001004196.3; NM_001318826.1; NM_001318828.1; NM_001318830.1; NM_001365852.1; NM_001365853.1; NM_001365854.1; NM_001365855.1; NM_005944.7; NR_158642.1	5 (NM_001318828.1,NM_001318830.1); 6 (NM_001365855.1,NM_005944.7,NM_001365853.1,NM_001318826.1); 7 (NM_001365852.1,NM_001004196.3,NM_001365854.1,NR_158642.1)	1350
CD207	CD207_01	CD207	NM_015717.5; XM_011532874.1	6 (NM_015717.5); 7 (XM_011532874.1)	1351
CD207	CD207_02	CD207	NM_015717.5; XM_011532874.1; XM_011532875.2; XM_011532876.2	5-6 (NM_015717.5); 6-7 (XM_011532874.1); 7-8 (XM_011532875.2,XM_011532876.2)	1352
CD207	CD207_03	CD207	NM_015717.5; XM_011532874.1; XM_011532875.2	6 (NM_015717.5); 7 (XM_011532874.1); 9 (XM_011532875.2)	1353
CD207	CD207_04	CD207	NM_015717.5; XM_011532874.1; XM_011532875.2; XM_011532876.2	3 (NM_015717.5); 4 (XM_011532874.1); 5 (XM_011532875.2,XM_011532876.2)	1354
CD207	CD207_05	CD207	NM_015717.5; XM_011532874.1; XM_011532875.2; XM_011532876.2	2 (NM_015717.5); 3 (XM_011532874.1); 4 (XM_011532875.2,XM_011532876.2)	1355
CD209	CD209_01	CD209	NM_001144893.2; NM_001144894.2; NM_001144895.2; NM_001144896.2; NM_001144897.2; NM_001144899.2; NM_021155.4; NR_026692.2; XM_005272472.4	4-5 (NM_001144893.2,NM_001144894.2); 5-6 (NR_026692.2,NM_001144896.2); 6-7 (NM_001144897.2,NM_001144895.2,XM_005272472.4,NM_021155.4,NM_001144899.2)	1356
CD209	CD209_02	CD209	NM_001144893.2; NM_001144894.2; NM_001144895.2; NM_001144896.2; NM_001144897.2; NM_001144899.2; NM_021155.4; NR_026692.2; XM_005272472.4	5 (NM_001144893.2,NM_001144894.2); 6 (NR_026692.2,NM_001144896.2); 7 (NM_001144897.2,NM_001144895.2,XM_005272472.4,NM_021155.4,NM_001144899.2)	1357
CD209	CD209_03	CD209	NM_001144893.2; NM_001144894.2; NM_001144895.2; NM_001144896.2; NM_001144897.2; NM_001144899.2; NM_021155.4; NR_026692.2; XM_005272472.4	5 (NM_001144893.2,NM_001144894.2); 6 (NR_026692.2,NM_001144896.2); 7 (NM_001144897.2,NM_001144895.2,XM_005272472.4,NM_021155.4,NM_001144899.2)	1358
CD22	CD22_01	CD22	NM_001185099.2; NM_001185100.2; NM_001185101.1; NM_001278417.2; NM_001771.4	3 (NM_001278417.2); 4 (NM_001185099.2,NM_001185101.1,NM_001771.4,NM_001185100.2)	1359
CD22	CD22_02	CD22	NM_001185099.2; NM_001185100.2; NM_001185101.1; NM_001278417.2; NM_001771.4	5 (NM_001185101.1); 6 (NM_001185099.2,NM_001278417.2); 7 (NM_001771.4,NM_001185100.2)	1360
CD22	CD22_03	CD22	NM_001185099.2; NM_001185100.2; NM_001185101.1; NM_001278417.2; NM_001771.4	5 (NM_001185101.1); 6 (NM_001185099.2,NM_001278417.2); 7 (NM_001771.4,NM_001185100.2)	1361
CD22	CD22_04	CD22	NM_001185099.2; NM_001185100.2; NM_001185101.1; NM_001278417.2; NM_001771.4	6 (NM_001185101.1); 7 (NM_001185099.2,NM_001278417.2); 8 (NM_001771.4,NM_001185100.2)	1362
CD22	CD22_05	CD22	NM_001185099.2; NM_001185100.2; NM_001185101.1; NM_001278417.2; NM_001771.4	11-12 (NM_001185101.1); 12-13 (NM_001185099.2,NM_001185100.2,NM_001278417.2); 13-14 (NM_001771.4)	1363
CD24	CD24_01	CD24	NM_001291737.1; NM_001291738.1; NM_001291739.1; NM_001359084.1; NM_013230.3; NR_117089.1; NR_117090.1; XM_024446293.1	2 (NR_117089.1,NM_001359084.1,NR_117090.1,NM_001291739.1); 3 (NM_001291737.1,NM_001291738.1,NM_013230.3,XM_024446293.1)	1364
CD24	CD24_02	CD24	NM_001291737.1; NM_001291738.1; NM_001291739.1; NM_001359084.1; NM_013230.3; NR_117089.1; NR_117090.1; XM_024446293.1	2 (NR_117089.1,NM_001359084.1,NR_117090.1,NM_001291739.1); 3 (NM_001291737.1,NM_001291738.1,NM_013230.3,XM_024446293.1)	1365
CD24	CD24_03	CD24	NM_001291737.1; NM_001291738.1; NM_001291739.1; NM_001359084.1; NM_013230.3; NR_117089.1; NR_117090.1; XM_024446293.1	2 (NR_117089.1,NM_001359084.1,NR_117090.1,NM_001291739.1); 3 (NM_001291737.1,NM_001291738.1,NM_013230.3,XM_024446293.1)	1366
CD24	CD24_04	CD24	NM_001291737.1; NM_001291738.1; NM_001291739.1; NM_001359084.1; NM_013230.3; NR_117089.1; NR_117090.1; XM_024446293.1	2 (NR_117089.1,NM_001359084.1,NR_117090.1,NM_001291739.1); 3 (NM_001291737.1,NM_001291738.1,NM_013230.3,XM_024446293.1)	1367
CD24	CD24_05	CD24	NM_001291737.1; NM_001291738.1; NM_001291739.1; NM_001359084.1; NM_013230.3; NR_117089.1; NR_117090.1; XM_024446293.1	2 (NR_117089.1,NM_001359084.1,NR_117090.1,NM_001291739.1); 3 (NM_001291737.1,NM_001291738.1,NM_013230.3,XM_024446293.1)	1368
CD244	CD244_01	CD244	NM_001166663.2; NM_001166664.2; NM_016382.4; XM_011509623.3; XR_001737229.1	7 (XM_011509623.3); 8 (NM_001166664.2); 9 (XR_001737229.1,NM_016382.4,NM_001166663.2)	1369
CD244	CD244_02	CD244	NM_001166663.2; NM_001166664.2; NM_016382.4; XM_011509621.2; XM_011509622.2; XR_001737229.1	2 (NM_001166664.2,XR_001737229.1,NM_016382.4,NM_001166663.2,XM_011509621.2,XM_011509622.2)	1370
CD244	CD244_03	CD244	NM_001166663.2; NM_001166664.2; NM_016382.4; XM_011509621.2; XM_011509622.2; XR_001737229.1	2 (NM_001166664.2,XR_001737229.1,NM_016382.4,NM_001166663.2,XM_011509621.2,XM_011509622.2)	1371
CD244	CD244_04	CD244	NM_001166663.2; NM_001166664.2; NM_016382.4; XM_011509621.2; XM_011509622.2; XM_011509623.3; XR_001737229.1	2-3 (XM_011509623.3); 3-4 (NM_001166664.2); 4-5 (XR_001737229.1,NM_016382.4,NM_001166663.2,XM_011509621.2,XM_011509622.2)	1372
CD244	CD244_05	CD244	NM_001166663.2; NM_001166664.2; NM_016382.4; XM_011509621.2; XM_011509622.2; XM_011509623.3; XR_001737229.1	4-5 (XM_011509623.3); 5-6 (NM_001166664.2); 6-7 (XR_001737229.1,NM_016382.4,NM_001166663.2,XM_011509621.2,XM_011509622.2)	1373
CD247	CD247_01	CD247	NM_000734.4; NM_001378515.1; NM_001378516.1; NM_198053.3; XM_011510144.2; XM_011510145.1	8 (NM_198053.3,NM_000734.4); 9 (NM_001378515.1,NM_001378516.1,XM_011510144.2,XM_011510145.1)	1374
CD247	CD247_02	CD247	NM_000734.4; NM_001378515.1; NM_001378516.1; NM_198053.3; XM_011510144.2; XM_011510145.1	8 (NM_198053.3,NM_000734.4); 9 (NM_001378515.1,NM_001378516.1,XM_011510144.2,XM_011510145.1)	1375
CD247	CD247_03	CD247	NM_000734.4; NM_001378515.1; NM_001378516.1; NM_198053.3; XM_011510144.2; XM_011510145.1	3-4 (NM_198053.3,NM_000734.4); 4-5 (NM_001378515.1,NM_001378516.1,XM_011510144.2,XM_011510145.1)	1376
CD247	CD247_04	CD247	NM_000734.4; NM_001378515.1; NM_001378516.1; NM_198053.3; XM_011510144.2; XM_011510145.1	8 (NM_198053.3,NM_000734.4); 9 (NM_001378515.1,NM_001378516.1,XM_011510144.2,XM_011510145.1)	1377
CD247	CD247_05	CD247	NM_000734.4; NM_001378515.1; NM_001378516.1; NM_198053.3; XM_011510144.2; XM_011510145.1	8 (NM_198053.3,NM_000734.4); 9 (NM_001378515.1,NM_001378516.1,XM_011510144.2,XM_011510145.1)	1378
CD27	CD27_01	CD27	NM_001242.5; XM_017020232.1; XM_017020234.1	2 (XM_017020234.1,XM_017020232.1)	1379
CD27	CD27_02	CD27	NM_001242.5; XM_017020232.1; XM_017020234.1	1-2 (XM_017020234.1,XM_017020232.1)	1380
CD27	CD27_03	CD27	NM_001242.5; XM_011521042.3; XM_017020232.1; XM_017020233.2; XM_017020234.1	2 (XM_017020233.2,XM_011521042.3); 3 (XM_017020234.1,XM_017020232.1)	1381
CD27	CD27_04	CD27	NM_001242.5; XM_011521042.3; XM_017020232.1; XM_017020233.2; XM_017020234.1	4 (XM_017020233.2); 4-5 (XM_011521042.3); 5 (XM_017020232.1); 6 (XM_017020234.1)	1382
CD27	CD27_05	CD27	NM_001242.5; XM_011521042.3; XM_017020232.1; XM_017020233.2; XM_017020234.1	4 (XM_017020233.2,XM_011521042.3); 5 (XM_017020234.1,XM_017020232.1)	1383
CD274	CD274_01	CD274	NM_001314029.2; NM_014143.4; NR_052005.2	3 (NM_001314029.2,NR_052005.2,NM_014143.4)	1384
CD274	CD274_02	CD274	NM_001314029.2; NM_014143.4; NR_052005.2	3 (NM_001314029.2,NR_052005.2,NM_014143.4)	1385
CD274	CD274_03	CD274	NM_001267706.1; NM_001314029.2; NM_014143.4; NR_052005.2	2-3 (NM_001267706.1); 3-4 (NM_001314029.2,NR_052005.2,NM_014143.4)	1386
CD274	CD274_04	CD274	NM_001267706.1; NM_001314029.2; NM_014143.4; NR_052005.2	3 (NM_001267706.1); 4 (NM_001314029.2,NM_014143.4); 4-5 (NR_052005.2)	1387
CD274	CD274_05	CD274	NM_001267706.1; NM_001314029.2; NM_014143.4	3 (NM_001267706.1); 4 (NM_001314029.2,NM_014143.4)	1388
CD276	CD276_01	CD276	NM_001024736.2; NM_001329628.2; NM_001329629.2; NM_025240.2; XM_005254700.4; XM_011522095.2; XM_017022638.1	2-4 (NM_001329629.2); 3 (NM_025240.2,NM_001329628.2); 3-5 (XM_017022638.1,XM_011522095.2,NM_001024736.2,XM_005254700.4)	1389
CD276	CD276_02	CD276	NM_001024736.2; NM_001329628.2; NM_001329629.2; NM_025240.2; XM_005254700.4; XM_011522095.2; XM_017022638.1	2-4 (NM_001329629.2); 3 (NM_025240.2,NM_001329628.2); 3-5 (XM_017022638.1,XM_011522095.2,NM_001024736.2,XM_005254700.4)	1390
CD276	CD276_03	CD276	NM_001024736.2; NM_001329628.2; NM_001329629.2; NM_025240.2; XM_005254700.4; XM_011522095.2; XM_017022638.1	3-5 (NM_001329629.2); 4 (NM_025240.2,NM_001329628.2); 4-6 (XM_017022638.1,XM_011522095.2,NM_001024736.2,XM_005254700.4)	1391
CD276	CD276_04	CD276	NM_001024736.2; NM_001329628.2; NM_001329629.2; NM_025240.2; XM_005254700.4; XM_011522095.2; XM_017022638.1	2-4 (NM_001329629.2); 3 (NM_025240.2,NM_001329628.2); 3-5 (XM_017022638.1,XM_011522095.2,NM_001024736.2,XM_005254700.4)	1392
CD276	CD276_05	CD276	NM_001024736.2; NM_001329628.2; NM_001329629.2; NM_025240.2; XM_005254700.4; XM_011522095.2; XM_017022638.1	3-5 (NM_001329629.2); 4 (NM_025240.2,NM_001329628.2); 4-6 (XM_017022638.1,XM_011522095.2,NM_001024736.2,XM_005254700.4)	1393
CD28	CD28_01	CD28	NM_001243077.2; NM_001243078.1; NM_006139.4; XM_011512194.2; XM_011512195.3; XM_011512197.2	3 (NM_001243078.1); 4 (NM_006139.4,NM_001243077.2,XM_011512194.2); 5 (XM_011512195.3,XM_011512197.2)	1394
CD28	CD28_02	CD28	NM_001243077.2; NM_001243078.1; NM_006139.4; XM_011512194.2; XM_011512195.3; XM_011512197.2	3 (NM_001243078.1); 4 (NM_006139.4,NM_001243077.2,XM_011512194.2); 5 (XM_011512195.3,XM_011512197.2)	1395
CD28	CD28_03	CD28	NM_001243077.2; NM_001243078.1; NM_006139.4; XM_011512197.2	1 (NM_006139.4,NM_001243077.2,NM_001243078.1,XM_011512197.2)	1396
CD28	CD28_04	CD28	NM_001243077.2; NM_001243078.1; NM_006139.4; XM_011512194.2; XM_011512195.3; XM_011512197.2	3 (NM_001243078.1); 4 (NM_006139.4,NM_001243077.2,XM_011512194.2); 5 (XM_011512195.3,XM_011512197.2)	1397
CD28	CD28_05	CD28	NM_001243077.2; NM_001243078.1; NM_006139.4; XM_011512194.2; XM_011512195.3; XM_011512197.2	3 (NM_001243078.1); 4 (NM_006139.4,NM_001243077.2,XM_011512194.2); 5 (XM_011512195.3,XM_011512197.2)	1398
CD300A	CD300A_01	CD300A	NM_001330456.1	1 (NM_001330456.1)	1399
CD300A	CD300A_02	CD300A	NM_001256841.2; NM_001330456.1; NM_001330457.2; NM_007261.4; XM_005256990.3; XM_005256991.5; XM_006721656.3	5 (XM_005256991.5,NM_001330457.2); 6 (XM_005256990.3,NM_001256841.2); 7 (NM_001330456.1,NM_007261.4,XM_006721656.3)	1400
CD300A	CD300A_03	CD300A	NM_001330456.1	1 (NM_001330456.1)	1401
CD300A	CD300A_04	CD300A	NM_001256841.2; NM_001330456.1; NM_001330457.2; NM_007261.4; XM_005256990.3; XM_005256991.5; XM_006721656.3	2 (NM_001330457.2,NM_001256841.2); 3 (NM_001330456.1,XM_005256991.5,NM_007261.4,XM_006721656.3,XM_005256990.3)	1402
CD300A	CD300A_05	CD300A	NM_001330456.1	1 (NM_001330456.1)	1403
CD33	CD33_01	CD33	NM_001177608.2; NM_001772.4; XM_011527531.2; XM_011527532.2; XM_017027508.1; XM_017027509.1; XM_017027510.1	1 (XM_017027510.1); 1-7 (XM_011527532.2,XM_017027509.1); 1-8 (XM_017027508.1); 2 (NM_001177608.2,NM_001772.4); 2-8 (XM_011527531.2)	1404
CD33	CD33_02	CD33	NM_001082618.2; NM_001772.4; XM_011527531.2; XM_011527532.2; XM_017027508.1; XM_017027509.1; XM_017027510.1	11 (XM_017027510.1,XM_017027509.1); 12 (XM_011527532.2); 13 (XM_017027508.1,XM_011527531.2); 6 (NM_001082618.2); 7 (NM_001772.4)	1405
CD33	CD33_03	CD33	NM_001082618.2; NM_001772.4; XM_011527531.2; XM_011527532.2; XM_017027508.1; XM_017027509.1; XM_017027510.1	11 (XM_017027510.1,XM_017027509.1); 12 (XM_011527532.2); 13 (XM_017027508.1,XM_011527531.2); 6 (NM_001082618.2); 7 (NM_001772.4)	1406
CD33	CD33_04	CD33	NM_001082618.2; NM_001772.4; XM_011527531.2; XM_011527532.2; XM_017027508.1; XM_017027509.1; XM_017027510.1	11 (XM_017027510.1,XM_017027509.1); 12 (XM_011527532.2); 13 (XM_017027508.1,XM_011527531.2); 6 (NM_001082618.2); 7 (NM_001772.4)	1407
CD33	CD33_05	CD33	XM_011527531.2; XM_017027508.1; XM_017027509.1; XM_017027510.1	5 (XM_017027510.1,XM_017027509.1); 6 (XM_017027508.1,XM_011527531.2)	1408
CD34	CD34_01	CD34	NM_001025109.2; NM_001773.3	8 (NM_001025109.2,NM_001773.3)	1409
CD34	CD34_02	CD34	NM_001025109.2; NM_001773.3	8 (NM_001025109.2,NM_001773.3)	1410
CD34	CD34_03	CD34	NM_001025109.2; NM_001773.3	3-4 (NM_001025109.2,NM_001773.3)	1411
CD34	CD34_04	CD34	NM_001025109.2; NM_001773.3	3 (NM_001025109.2,NM_001773.3)	1412
CD34	CD34_05	CD34	NM_001025109.2; NM_001773.3	7 (NM_001025109.2,NM_001773.3)	1413
CD36	CD36_01	CD36	NM_000072.3; NM_001001547.3; NM_001001548.2; NM_001127443.1; NM_001127444.2; NM_001289908.1; NM_001289909.1; NM_001289911.2; NM_001371074.1; NM_001371075.1; NM_001371077.1; NM_001371078.1; NM_001371079.1; NM_001371080.1; NM_001371081.1; NR_110501.1; XM_005250715.5; XM_024447002.1; XM_024447003.1	2 (NM_001371080.1); 3 (NM_001289911.2,NM_001127444.2,NM_001289908.1); 4 (NR_110501.1,NM_001127443.1,NM_001289909.1); 5 (XM_005250715.5,NM_000072.3,XM_024447003.1,NM_001371081.1,NM_001001547.3,NM_001371074.1,NM_001371079.1,NM_001371077.1,NM_001371075.1,NM_001001548.2,NM_001371078.1,XM_024447002.1)	1414
CD36	CD36_02	CD36	NM_000072.3; NM_001001547.3; NM_001001548.2; NM_001127443.1; NM_001127444.2; NM_001289908.1; NM_001289911.2; NM_001371074.1; NM_001371075.1; NM_001371077.1; NM_001371078.1; NM_001371079.1; NM_001371080.1; NM_001371081.1; NR_110501.1; XM_005250715.5; XM_024447002.1; XM_024447003.1	3 (NM_001371080.1); 4 (NM_001289911.2,NM_001127444.2,NM_001289908.1); 5 (NR_110501.1,NM_001127443.1); 6 (XM_005250715.5,NM_000072.3,XM_024447003.1,NM_001371081.1,NM_001001547.3,NM_001371074.1,NM_001371079.1,NM_001371077.1,NM_001371075.1,NM_001001548.2,NM_001371078.1,XM_024447002.1)	1415
CD36	CD36_03	CD36	NM_000072.3; NM_001001547.3; NM_001001548.2; NM_001127443.1; NM_001127444.2; NM_001289908.1; NM_001289909.1; NM_001371074.1; NM_001371075.1; NM_001371077.1; NM_001371078.1; NM_001371079.1; NM_001371081.1; NR_110501.1; XM_005250715.5; XM_024447002.1; XM_024447003.1	1 (NM_001127444.2,NM_001289908.1); 2 (NR_110501.1,NM_001127443.1,NM_001289909.1); 3 (XM_005250715.5,NM_000072.3,XM_024447003.1,NM_001371081.1,NM_001001547.3,NM_001371074.1,NM_001371079.1,NM_001371077.1,NM_001371075.1,NM_001001548.2,NM_001371078.1,XM_024447002.1)	1416
CD36	CD36_04	CD36	NM_000072.3; NM_001001547.3; NM_001001548.2; NM_001127443.1; NM_001127444.2; NM_001289908.1; NM_001289909.1; NM_001289911.2; NM_001371074.1; NM_001371075.1; NM_001371077.1; NM_001371078.1; NM_001371079.1; NM_001371080.1; NM_001371081.1; NR_110501.1; XM_005250715.5; XM_024447002.1; XM_024447003.1	10-11 (XM_005250715.5,NM_000072.3,XM_024447003.1,NM_001371081.1,NM_001001547.3,NM_001371074.1,NM_001371079.1,NM_001371077.1,NM_001371075.1,NM_001001548.2,NM_001371078.1,XM_024447002.1); 6-7 (NM_001289908.1); 7-8 (NM_001371080.1); 8-9 (NM_001289911.2,NM_001127444.2,NR_110501.1,NM_001289909.1); 9-10 (NM_001127443.1)	1417
CD36	CD36_05	CD36	NM_000072.3; NM_001001547.3; NM_001001548.2; NM_001127443.1; NM_001127444.2; NM_001289908.1; NM_001289909.1; NM_001289911.2; NM_001371074.1; NM_001371075.1; NM_001371077.1; NM_001371078.1; NM_001371079.1; NM_001371080.1; NM_001371081.1; NR_110501.1; XM_005250715.5; XM_024447002.1; XM_024447003.1	1-2 (NM_001371080.1); 2-3 (NM_001289911.2,NM_001127444.2,NM_001289908.1); 3-4 (NR_110501.1,NM_001127443.1,NM_001289909.1); 4-5 (XM_005250715.5,NM_000072.3,XM_024447003.1,NM_001371081.1,NM_001001547.3,NM_001371074.1,NM_001371079.1,NM_001371077.1,NM_001371075.1,NM_001001548.2,NM_001371078.1,XM_024447002.1)	1418
CD37	CD37_01	CD37	NM_001040031.2; NM_001774.3; XM_005259435.3; XM_005259436.3; XM_011527542.3; XM_011527543.3; XM_011527544.3; XM_017027513.1	2 (NM_001040031.2,XM_017027513.1,XM_005259435.3,XM_011527544.3,XM_011527543.3,NM_001774.3,XM_005259436.3,XM_011527542.3)	1419
CD37	CD37_02	CD37	NM_001040031.2; NM_001774.3; XM_005259435.3; XM_005259436.3; XM_011527542.3; XM_011527543.3; XM_011527544.3; XM_017027513.1	5 (NM_001040031.2,XM_017027513.1,XM_005259435.3,XM_011527544.3,XM_011527543.3,NM_001774.3,XM_005259436.3,XM_011527542.3)	1420
CD37	CD37_03	CD37	NM_001040031.2; NM_001774.3; XM_005259435.3; XM_005259436.3; XM_011527542.3; XM_011527543.3; XM_011527544.3; XM_017027513.1	6 (NM_001040031.2,XM_017027513.1,XM_005259435.3,XM_011527544.3,XM_011527543.3,NM_001774.3,XM_005259436.3,XM_011527542.3)	1421
CD37	CD37_04	CD37	NM_001040031.2; NM_001774.3; XM_005259435.3; XM_005259436.3; XM_011527542.3; XM_011527543.3; XM_011527544.3; XM_017027513.1	4-5 (NM_001040031.2,XM_017027513.1,XM_005259435.3,XM_011527544.3,XM_011527543.3,NM_001774.3,XM_005259436.3,XM_011527542.3)	1422
CD37	CD37_05	CD37	NM_001040031.2; NM_001774.3; XM_005259435.3; XM_005259436.3; XM_011527542.3; XM_011527543.3; XM_011527544.3; XM_017027513.1	2-3 (NM_001040031.2,XM_017027513.1,XM_005259435.3,XM_011527544.3,XM_011527543.3,NM_001774.3,XM_005259436.3,XM_011527542.3)	1423
CD38	CD38_01	CD38	NM_001775.4; NR_132660.2	2 (NR_132660.2,NM_001775.4)	1424
CD38	CD38_02	CD38	NM_001775.4; NR_132660.2	7 (NR_132660.2); 8 (NM_001775.4)	1425
CD38	CD38_03	CD38	NM_001775.4; NR_132660.2	7 (NR_132660.2); 8 (NM_001775.4)	1426
CD38	CD38_04	CD38	NM_001775.4; NR_132660.2	5 (NR_132660.2); 6 (NM_001775.4)	1427
CD38	CD38_05	CD38	NM_001775.4; NR_132660.2	7 (NR_132660.2); 8 (NM_001775.4)	1428
CD3D	CD3D_01	CD3D	NM_000732.6; NM_001040651.2	2 (NM_000732.6,NM_001040651.2)	1429
CD3D	CD3D_02	CD3D	NM_000732.6; NM_001040651.2	1 (NM_000732.6,NM_001040651.2)	1430
CD3D	CD3D_03	CD3D	NM_000732.6; NM_001040651.2	2 (NM_000732.6,NM_001040651.2)	1431
CD3D	CD3D_04	CD3D	NM_000732.6; NM_001040651.2	2 (NM_000732.6,NM_001040651.2)	1432
CD3D	CD3D_05	CD3D	NM_000732.6; NM_001040651.2	1 (NM_000732.6,NM_001040651.2)	1433
CD3E	CD3E_01	CD3E	NM_000733.4	2-4 (NM_000733.4)	1434
CD3E	CD3E_02	CD3E	NM_000733.4	6 (NM_000733.4)	1435
CD3E	CD3E_03	CD3E	NM_000733.4	7 (NM_000733.4)	1436
CD3E	CD3E_04	CD3E	NM_000733.4	7 (NM_000733.4)	1437
CD3E	CD3E_05	CD3E	NM_000733.4	9 (NM_000733.4)	1438
CD3EAP	CD3EAP_01	POLR1G	NM_001297590.2; NM_012099.3	2 (NM_012099.3,NM_001297590.2)	1439
CD3EAP	CD3EAP_02	POLR1G	NM_001297590.2; NM_012099.3	3 (NM_012099.3,NM_001297590.2)	1440
CD3EAP	CD3EAP_03	POLR1G	NM_001297590.2; NM_012099.3	2-3 (NM_012099.3,NM_001297590.2)	1441
CD3EAP	CD3EAP_04	POLR1G	NM_001297590.2; NM_012099.3	3 (NM_012099.3,NM_001297590.2)	1442
CD3EAP	CD3EAP_05	POLR1G	NM_001297590.2; NM_012099.3	3 (NM_012099.3,NM_001297590.2)	1443
CD3G	CD3G_01	CD3G	NM_000073.3; XM_005271724.4; XM_006718941.3	2-3 (NM_000073.3,XM_005271724.4,XM_006718941.3)	1444
CD3G	CD3G_02	CD3G	NM_000073.3; XM_005271724.4; XM_006718941.3	4 (NM_000073.3,XM_005271724.4,XM_006718941.3)	1445
CD3G	CD3G_03	CD3G	NM_000073.3; XM_006718941.3	6-7 (NM_000073.3,XM_006718941.3)	1446
CD3G	CD3G_04	CD3G	NM_000073.3; XM_005271724.4; XM_006718941.3	2-3 (NM_000073.3,XM_005271724.4,XM_006718941.3)	1447
CD3G	CD3G_05	CD3G	NM_000073.3; XM_006718941.3	6-7 (NM_000073.3,XM_006718941.3)	1448
CD4	CD4_01	CD4	NM_000616.5; NM_001195014.3; NM_001195015.3; NM_001195016.3; NM_001195017.3; XM_017020228.2	2 (XM_017020228.2,NM_001195017.3,NM_001195015.3,NM_001195016.3,NM_001195014.3); 4 (NM_000616.5)	1449
CD4	CD4_02	CD4	NM_000616.5; NM_001195014.3; NM_001195015.3; NM_001195016.3; NM_001195017.3; XM_017020228.2	3 (XM_017020228.2,NM_001195017.3,NM_001195015.3,NM_001195016.3,NM_001195014.3); 5 (NM_000616.5)	1450
CD4	CD4_03	CD4	NM_000616.5; NM_001195014.3; NM_001195015.3; NM_001195016.3; NM_001195017.3; XM_017020228.2	3 (XM_017020228.2,NM_001195017.3,NM_001195015.3,NM_001195016.3,NM_001195014.3); 5 (NM_000616.5)	1451
CD4	CD4_04	CD4	NM_000616.5; NM_001195014.3; NM_001195015.3; NM_001195016.3; NM_001195017.3; XM_017020228.2	4-5 (XM_017020228.2,NM_001195017.3,NM_001195015.3,NM_001195016.3,NM_001195014.3); 6-7 (NM_000616.5)	1452
CD4	CD4_05	CD4	NM_000616.5; NM_001195014.3; NM_001195015.3; NM_001195016.3; NM_001195017.3; XM_017020228.2	5 (XM_017020228.2,NM_001195017.3,NM_001195015.3,NM_001195016.3,NM_001195014.3); 7 (NM_000616.5)	1453
CD40	CD40_01	CD40	NM_001250.6; NM_001302753.2; NM_001322421.2; NM_001322422.2; NM_001362758.2; NM_152854.4; NR_126502.2; NR_136327.2; XM_005260619.3; XM_011529109.2; XM_017028135.1; XM_017028136.1	2-3 (NR_126502.2,XM_017028136.1,XM_011529109.2,NM_001302753.2,NM_001322422.2,NM_001362758.2,NM_001322421.2,XM_005260619.3,NR_136327.2,XM_017028135.1,NM_152854.4,NM_001250.6)	1454
CD40	CD40_02	CD40	NM_001250.6; NM_001302753.2; NM_001322421.2; NM_001322422.2; NM_001362758.2; NM_152854.4; NR_126502.2; NR_136327.2; XM_005260619.3; XM_011529109.2; XM_017028135.1; XM_017028136.1	2 (NR_126502.2,XM_017028136.1,XM_011529109.2,NM_001302753.2,NM_001322422.2,NM_001362758.2,NM_001322421.2,XM_005260619.3,NR_136327.2,XM_017028135.1,NM_152854.4,NM_001250.6)	1455
CD40	CD40_03	CD40	NM_001250.6; NM_001302753.2; NM_001322421.2; NM_001362758.2; NM_152854.4; XM_017028135.1; XM_017028136.1	5-6 (XM_017028136.1,NM_001302753.2,NM_001362758.2,NM_001322421.2,XM_017028135.1,NM_152854.4,NM_001250.6)	1456
CD40	CD40_04	CD40	NM_001250.6; NM_001302753.2; NM_001322421.2; NM_001362758.2; NM_152854.4; XM_017028135.1; XM_017028136.1	5 (XM_017028136.1,NM_001302753.2,NM_001362758.2,NM_001322421.2,XM_017028135.1,NM_152854.4,NM_001250.6)	1457
CD40	CD40_05	CD40	NM_001250.6; NM_001302753.2; NM_001322421.2; NM_001322422.2; NM_001362758.2; NM_152854.4; NR_126502.2; NR_136327.2; XM_005260619.3; XM_017028135.1; XM_017028136.1	7 (NR_126502.2,NM_001322422.2,XM_005260619.3); 8 (XM_017028136.1,NR_136327.2,NM_152854.4); 9 (NM_001302753.2,NM_001362758.2,NM_001322421.2,XM_017028135.1,NM_001250.6)	1458
CD40LG	CD40LG_01	CD40LG	NM_000074.3	1 (NM_000074.3)	1459
CD40LG	CD40LG_02	CD40LG	NM_000074.3	2 (NM_000074.3)	1460
CD40LG	CD40LG_03	CD40LG	NM_000074.3	3-4 (NM_000074.3)	1461
CD40LG	CD40LG_04	CD40LG	NM_000074.3	5 (NM_000074.3)	1462
CD40LG	CD40LG_05	CD40LG	NM_000074.3	5 (NM_000074.3)	1463
CD44	CD44_01	CD44	NM_000610.4; NM_001001389.2; NM_001001390.2; NM_001001391.2; NM_001001392.2; NM_001202555.2; NM_001202556.2; NM_001202557.2; XM_005253231.3; XM_005253232.3; XM_005253235.3; XM_005253238.3; XM_005253239.3; XM_005253240.3; XM_006718388.2; XM_006718390.4; XM_011520482.2; XM_011520483.2; XM_011520484.2; XM_011520485.2; XM_011520486.2; XM_011520487.3; XM_011520488.2; XM_011520489.3; XM_017018583.2; XM…	1-2 (XM_005253238.3,XM_011520486.2,XM_005253231.3,XM_011520483.2,NM_001202556.2,XM_017018583.2,XM_011520484.2,NM_001001391.2,XM_011520488.2,XM_011520482.2,XM_017018585.2,XM_011520487.3,XM_005253240.3,XM_011520485.2,XM_005253232.3,XM_006718390.4,XM_011520489.3,NM_000610.4,NM_001001392.2,NM_001202555.2,NM_001001390.2,XM_005253239.3,XM_006718388.2,XM_005253235.3,XM_017018584.2,NM_001202557.2,NM_0010…	1464
CD44	CD44_02	CD44	NM_000610.4; NM_001001389.2; NM_001001390.2; NM_001001391.2; NM_001001392.2; NM_001202555.2; NM_001202556.2; NM_001202557.2; XM_005253231.3; XM_005253232.3; XM_005253235.3; XM_005253238.3; XM_005253239.3; XM_005253240.3; XM_006718388.2; XM_006718390.4; XM_011520482.2; XM_011520483.2; XM_011520484.2; XM_011520485.2; XM_011520486.2; XM_011520487.3; XM_011520488.2; XM_011520489.3; XM_017018583.2; XM…	1 (XM_005253238.3,XM_011520486.2,XM_005253231.3,XM_011520483.2,NM_001202556.2,XM_017018583.2,XM_011520484.2,NM_001001391.2,XM_011520488.2,XM_011520482.2,XM_017018585.2,XM_011520487.3,XM_005253240.3,XM_011520485.2,XM_005253232.3,XM_006718390.4,XM_011520489.3,NM_000610.4,NM_001001392.2,NM_001202555.2,NM_001001390.2,XM_005253239.3,XM_006718388.2,XM_005253235.3,XM_017018584.2,NM_001202557.2,NM_001001…	1465
CD44	CD44_03	CD44	NM_000610.4; NM_001001389.2; NM_001001390.2; NM_001001391.2; NM_001001392.2; NM_001202555.2; NM_001202556.2; NM_001202557.2; XM_005253231.3; XM_005253232.3; XM_005253235.3; XM_005253238.3; XM_005253239.3; XM_005253240.3; XM_006718388.2; XM_006718390.4; XM_011520482.2; XM_011520483.2; XM_011520484.2; XM_011520485.2; XM_011520486.2; XM_011520487.3; XM_011520488.2; XM_011520489.3; XM_017018583.2; XM…	2-3 (XM_005253238.3,XM_011520486.2,XM_005253231.3,XM_011520483.2,NM_001202556.2,XM_017018583.2,XM_011520484.2,NM_001001391.2,XM_011520488.2,XM_011520482.2,XM_017018585.2,XM_011520487.3,XM_005253240.3,XM_011520485.2,XM_005253232.3,XM_006718390.4,XM_011520489.3,NM_000610.4,NM_001001392.2,NM_001202555.2,NM_001001390.2,XM_005253239.3,XM_006718388.2,XM_005253235.3,XM_017018584.2,NM_001202557.2,NM_0010…	1466
CD44	CD44_04	CD44	NM_000610.4; NM_001001389.2; NM_001001390.2; NM_001001391.2; NM_001001392.2; NM_001202555.2; NM_001202556.2; XM_005253231.3; XM_005253232.3; XM_005253235.3; XM_005253238.3; XM_005253239.3; XM_005253240.3; XM_006718388.2; XM_011520482.2; XM_011520483.2; XM_011520484.2; XM_011520485.2; XM_011520486.2; XM_011520488.2; XM_017018583.2; XM_017018584.2; XM_017018585.2	10 (XM_017018585.2,NM_001202555.2); 11 (XM_011520488.2,XM_017018584.2); 12 (NM_001001390.2); 13 (XM_011520486.2,XM_005253240.3); 14 (XM_005253238.3,XM_005253239.3); 16 (XM_011520483.2,XM_011520484.2,XM_011520485.2); 17 (XM_017018583.2,XM_011520482.2,XM_005253235.3,NM_001001389.2); 18 (XM_005253231.3,XM_005253232.3,NM_000610.4,XM_006718388.2); 4 (NM_001001392.2); 8 (NM_001202556.2); 9 (NM_00100139…	1467
CD44	CD44_05	CD44	NM_000610.4; NM_001001389.2; NM_001001390.2; NM_001001391.2; NM_001001392.2; NM_001202555.2; NM_001202556.2; XM_005253231.3; XM_005253232.3; XM_005253235.3; XM_005253238.3; XM_005253239.3; XM_005253240.3; XM_006718388.2; XM_011520482.2; XM_011520483.2; XM_011520484.2; XM_011520485.2; XM_011520486.2; XM_011520488.2; XM_017018583.2; XM_017018584.2; XM_017018585.2	10 (XM_017018585.2,NM_001202555.2); 11 (XM_011520488.2,XM_017018584.2); 12 (NM_001001390.2); 13 (XM_011520486.2,XM_005253240.3); 14 (XM_005253238.3,XM_005253239.3); 16 (XM_011520483.2,XM_011520484.2,XM_011520485.2); 17 (XM_017018583.2,XM_011520482.2,XM_005253235.3,NM_001001389.2); 18 (XM_005253231.3,XM_005253232.3,NM_000610.4,XM_006718388.2); 4 (NM_001001392.2); 8 (NM_001202556.2); 9 (NM_00100139…	1468
CD46	CD46_01	CD46	NM_002389.4; NM_153826.4; NM_172350.3; NM_172351.3; NM_172352.3; NM_172353.3; NM_172358.3; NM_172359.3; XR_001737177.2; XR_002956621.1; XR_002956622.1	6-7 (NM_172352.3,NM_172353.3,NM_172350.3,XR_002956621.1,XR_002956622.1); 7-8 (NM_172351.3,NM_153826.4,NM_172358.3); 8-9 (NM_002389.4,NM_172359.3,XR_001737177.2)	1469
CD46	CD46_02	CD46	NM_002389.4; NM_153826.4; NM_172351.3; NM_172355.3; NM_172356.3; NM_172358.3; NM_172359.3; XM_011509563.2; XM_017001308.2; XR_001737177.2; XR_002956621.1; XR_002956622.1	6 (XR_002956621.1,XR_002956622.1); 6-7 (NM_172351.3,NM_153826.4,NM_172358.3,NM_172356.3,NM_172355.3); 7-8 (NM_002389.4,NM_172359.3,XR_001737177.2,XM_017001308.2,XM_011509563.2)	1470
CD47	CD47_01	CD47	NM_001777.3; NM_198793.2; XM_005247908.2; XM_005247909.2; XR_001740374.2; XR_001740375.2; XR_002959610.1; XR_002959611.1; XR_241521.2; XR_241522.2; XR_924218.2; XR_924219.2; XR_924220.2	2 (NM_001777.3,XR_002959610.1,XR_241521.2,NM_198793.2,XR_241522.2,XR_001740375.2,XR_924220.2,XM_005247908.2,XR_924218.2,XR_924219.2,XM_005247909.2,XR_001740374.2,XR_002959611.1)	1471
CD47	CD47_02	CD47	NM_001777.3; NM_198793.2; XM_005247908.2; XM_005247909.2; XR_001740374.2; XR_001740375.2; XR_002959610.1; XR_002959611.1; XR_241521.2; XR_241522.2; XR_924218.2; XR_924219.2; XR_924220.2	2 (NM_001777.3,XR_002959610.1,XR_241521.2,NM_198793.2,XR_241522.2,XR_001740375.2,XR_924220.2,XM_005247908.2,XR_924218.2,XR_924219.2,XM_005247909.2,XR_001740374.2,XR_002959611.1)	1472
CD47	CD47_03	CD47	NM_001777.3; NM_198793.2; XM_005247908.2; XM_005247909.2; XR_001740374.2; XR_001740375.2; XR_002959610.1; XR_002959611.1; XR_241521.2; XR_241522.2; XR_924218.2; XR_924219.2; XR_924220.2	2 (NM_001777.3,XR_002959610.1,XR_241521.2,NM_198793.2,XR_241522.2,XR_001740375.2,XR_924220.2,XM_005247908.2,XR_924218.2,XR_924219.2,XM_005247909.2,XR_001740374.2,XR_002959611.1)	1473
CD47	CD47_04	CD47	NM_001777.3; NM_198793.2; XM_005247908.2; XM_005247909.2; XR_001740374.2; XR_001740375.2; XR_002959610.1; XR_002959611.1; XR_241521.2; XR_241522.2; XR_924218.2; XR_924219.2; XR_924220.2	6-7 (NM_001777.3,XR_002959610.1,XR_241521.2,NM_198793.2,XR_241522.2,XR_001740375.2,XR_924220.2,XM_005247908.2,XR_924218.2,XR_924219.2,XM_005247909.2,XR_001740374.2,XR_002959611.1)	1474
CD47	CD47_05	CD47	NM_001777.3; NM_198793.2; XM_005247908.2; XM_005247909.2; XR_001740374.2; XR_001740375.2; XR_002959610.1; XR_002959611.1; XR_241521.2; XR_241522.2; XR_924218.2; XR_924219.2; XR_924220.2	6 (NM_001777.3,XR_002959610.1,XR_241521.2,NM_198793.2,XR_241522.2,XR_001740375.2,XR_924220.2,XM_005247908.2,XR_924218.2,XR_924219.2,XM_005247909.2,XR_001740374.2,XR_002959611.1)	1475
CD48	CD48_01	CD48	NM_001256030.1; NM_001778.4; XM_011510171.2; XM_017002867.2	1-2 (XM_017002867.2); 2-3 (NM_001256030.1,NM_001778.4); 3-4 (XM_011510171.2)	1476
CD48	CD48_02	CD48	NM_001778.4; XM_005245625.1; XM_011510171.2; XM_017002867.2	3 (XM_017002867.2,XM_005245625.1); 4 (NM_001778.4); 5 (XM_011510171.2)	1477
CD48	CD48_03	CD48	NM_001256030.1; NM_001778.4; XM_011510171.2; XM_017002867.2	2 (XM_017002867.2); 3 (NM_001256030.1,NM_001778.4); 4 (XM_011510171.2)	1478
CD48	CD48_04	CD48	NM_001256030.1; NM_001778.4; XM_005245625.1; XM_011510171.2	2 (NM_001256030.1,NM_001778.4,XM_005245625.1); 3 (XM_011510171.2)	1479
CD48	CD48_05	CD48	NM_001256030.1; NM_001778.4; XM_005245625.1; XM_011510171.2	2 (NM_001256030.1,NM_001778.4,XM_005245625.1); 3 (XM_011510171.2)	1480
CD5	CD5_01	CD5	NM_001346456.1; NM_014207.4	11 (NM_014207.4,NM_001346456.1)	1481
CD5	CD5_02	CD5	NM_001346456.1; NM_014207.4	3 (NM_014207.4,NM_001346456.1)	1482
CD5	CD5_03	CD5	NM_001346456.1; NM_014207.4	11 (NM_014207.4,NM_001346456.1)	1483
CD5	CD5_04	CD5	NM_001346456.1; NM_014207.4	7-8 (NM_014207.4,NM_001346456.1)	1484
CD5	CD5_05	CD5	NM_001346456.1; NM_014207.4	5 (NM_014207.4,NM_001346456.1)	1485
CD53	CD53_01	CD53	NM_000560.4; NM_001040033.1; NM_001320638.1; XM_024451057.1	3 (NM_000560.4,XM_024451057.1,NM_001320638.1); 4 (NM_001040033.1)	1486
CD53	CD53_02	CD53	NM_000560.4; NM_001040033.1; XM_024451057.1	5-6 (NM_000560.4,XM_024451057.1); 6-7 (NM_001040033.1)	1487
CD53	CD53_03	CD53	NM_000560.4; NM_001040033.1; NM_001320638.1; XM_024451057.1	4-5 (NM_001320638.1); 6-7 (NM_000560.4,XM_024451057.1); 7-8 (NM_001040033.1)	1488
CD53	CD53_04	CD53	NM_000560.4; NM_001040033.1; NM_001320638.1; XM_024451057.1	4-5 (NM_000560.4,XM_024451057.1,NM_001320638.1); 5-6 (NM_001040033.1)	1489
CD53	CD53_05	CD53	NM_000560.4; NM_001040033.1; NM_001320638.1; XM_024451057.1	6 (NM_001320638.1); 8 (NM_000560.4,XM_024451057.1); 9 (NM_001040033.1)	1490
CD55	CD55_01	CD55	NM_000574.5; NM_001114752.3; NM_001300902.2; NM_001300903.2; NM_001300904.2; NR_125349.2; XM_017000467.2	2 (NM_001300903.2,XM_017000467.2,NR_125349.2,NM_000574.5,NM_001114752.3,NM_001300904.2,NM_001300902.2)	1491
CD55	CD55_02	CD55	NM_000574.5; NM_001114752.3; NM_001300902.2; NM_001300903.2; NM_001300904.2; NR_125349.2; XM_017000467.2	4 (NM_001300903.2,XM_017000467.2,NR_125349.2,NM_000574.5,NM_001114752.3,NM_001300904.2,NM_001300902.2)	1492
CD55	CD55_03	CD55	NM_000574.5; NM_001114752.3; NM_001300903.2; NM_001300904.2; NR_125349.2	10-11 (NM_001300903.2,NR_125349.2,NM_001114752.3,NM_001300904.2); 9-10 (NM_000574.5)	1493
CD55	CD55_04	CD55	NM_000574.5; NM_001114752.3; NM_001300902.2; NM_001300903.2; NM_001300904.2; NR_125349.2; XM_017000467.2	7-8 (NM_001300903.2,XM_017000467.2,NR_125349.2,NM_000574.5,NM_001114752.3,NM_001300904.2,NM_001300902.2)	1494
CD55	CD55_05	CD55	NM_000574.5; NM_001114752.3; NM_001300903.2; NM_001300904.2; NR_125349.2	10 (NM_000574.5); 11 (NM_001300903.2,NR_125349.2,NM_001114752.3,NM_001300904.2)	1495
CD58	CD58_01	CD58	NM_001144822.1; NM_001779.3; NR_026665.2; XM_017002869.2	2-3 (NR_026665.2,XM_017002869.2,NM_001779.3,NM_001144822.1)	1496
CD58	CD58_02	CD58	NM_001144822.1; NM_001779.3; NR_026665.2; XM_017002869.2	1-2 (NR_026665.2,XM_017002869.2,NM_001779.3,NM_001144822.1)	1497
CD58	CD58_03	CD58	NM_001144822.1; NM_001779.3; NR_026665.2; XM_017002869.2	3-4 (NR_026665.2,XM_017002869.2,NM_001779.3,NM_001144822.1)	1498
CD58	CD58_04	CD58	NM_001144822.1; NM_001779.3; NR_026665.2; XM_017002869.2	2 (NR_026665.2,XM_017002869.2,NM_001779.3,NM_001144822.1)	1499
CD58	CD58_05	CD58	NM_001144822.1; NM_001779.3; NR_026665.2; XM_017002869.2	3 (NR_026665.2,XM_017002869.2,NM_001779.3,NM_001144822.1)	1500
CD59	CD59_01	CD59	NM_000611.6; NM_001127223.1; NM_001127225.1; NM_001127226.1; NM_001127227.1; NM_203329.2; NM_203330.2; NM_203331.2	3 (NM_001127223.1); 4 (NM_000611.6,NM_001127227.1,NM_001127226.1,NM_001127225.1); 5 (NM_203329.2,NM_203331.2); 6 (NM_203330.2)	1501
CD59	CD59_02	CD59	NM_000611.6; NM_001127223.1; NM_001127225.1; NM_001127226.1; NM_001127227.1; NM_203329.2; NM_203330.2; NM_203331.2	3 (NM_001127223.1); 4 (NM_000611.6,NM_001127227.1,NM_001127226.1,NM_001127225.1); 5 (NM_203329.2,NM_203331.2); 6 (NM_203330.2)	1502
CD59	CD59_03	CD59	NM_000611.6; NM_001127223.1; NM_001127225.1; NM_001127226.1; NM_001127227.1; NM_203329.2; NM_203330.2; NM_203331.2	3 (NM_001127223.1); 4 (NM_000611.6,NM_001127227.1,NM_001127226.1,NM_001127225.1); 5 (NM_203329.2,NM_203331.2); 6 (NM_203330.2)	1503
CD59	CD59_04	CD59	NM_000611.6; NM_001127223.1; NM_001127225.1; NM_001127226.1; NM_001127227.1; NM_203329.2; NM_203330.2; NM_203331.2	3 (NM_001127223.1); 4 (NM_000611.6,NM_001127227.1,NM_001127226.1,NM_001127225.1); 5 (NM_203329.2,NM_203331.2); 6 (NM_203330.2)	1504
CD59	CD59_05	CD59	NM_000611.6; NM_001127223.1; NM_001127225.1; NM_001127226.1; NM_001127227.1; NM_203329.2; NM_203330.2; NM_203331.2	3 (NM_001127223.1); 4 (NM_000611.6,NM_001127227.1,NM_001127226.1,NM_001127225.1); 5 (NM_203329.2,NM_203331.2); 6 (NM_203330.2)	1505
CD6	CD6_01	CD6	NM_001254750.2; NM_001254751.2; NM_006725.5; NR_045638.2; XM_006718738.2; XM_006718739.2; XM_006718740.2; XM_006718741.2; XM_011545360.2; XM_011545362.2	11 (XM_006718741.2,NM_001254750.2,NM_001254751.2); 12 (XM_006718739.2,XM_006718738.2,XM_006718740.2,XM_011545362.2,NR_045638.2); 13 (XM_011545360.2,NM_006725.5)	1506
CD6	CD6_02	CD6	NM_001254750.2; NM_006725.5; NR_045638.2; XM_006718738.2; XM_011545360.2; XM_011545362.2	8 (NM_001254750.2,XM_006718738.2,XM_011545362.2); 9 (XM_011545360.2,NM_006725.5,NR_045638.2)	1507
CD6	CD6_03	CD6	NM_001254750.2; NM_001254751.2; NM_006725.5; NR_045638.2; XM_006718738.2; XM_006718739.2; XM_006718740.2; XM_006718741.2; XM_011545360.2; XM_011545362.2	10 (NM_001254750.2,XM_006718739.2,XM_006718738.2,XM_006718740.2,XM_011545362.2,NM_001254751.2); 11 (XM_011545360.2,NM_006725.5,NR_045638.2); 9 (XM_006718741.2)	1508
CD6	CD6_04	CD6	NM_001254750.2; NM_001254751.2; NM_006725.5; NR_045638.2; XM_006718738.2; XM_006718739.2; XM_006718740.2; XM_006718741.2; XM_011545360.2; XM_011545362.2	1 (XM_006718741.2,NM_001254750.2,XM_006718739.2,XM_006718738.2,XM_011545360.2,NM_006725.5,XM_006718740.2,XM_011545362.2,NM_001254751.2,NR_045638.2)	1509
CD6	CD6_05	CD6	NM_001254750.2; NM_001254751.2; NM_006725.5; NR_045638.2; XM_006718738.2; XM_006718739.2; XM_006718740.2; XM_006718741.2; XM_011545360.2; XM_011545362.2	5 (XM_011545362.2); 6 (XM_006718741.2,NM_001254750.2,XM_006718739.2,XM_006718738.2,XM_011545360.2,NM_006725.5,XM_006718740.2,NM_001254751.2,NR_045638.2)	1510
CD63	CD63_01	CD63	NM_001257389.1; NM_001257390.1; NM_001257391.1; NM_001257392.1; NM_001257400.1; NM_001257401.1; NM_001267698.1; NM_001780.6; XM_024449283.1	7 (NM_001257392.1,NM_001257391.1,NM_001257401.1,NM_001257400.1); 8 (NM_001780.6,NM_001267698.1,NM_001257390.1,NM_001257389.1); 9 (XM_024449283.1)	1511
CD63	CD63_02	CD63	NM_001257389.1; NM_001257390.1; NM_001257391.1; NM_001257392.1; NM_001257400.1; NM_001257401.1; NM_001267698.1; NM_001780.6; XM_024449283.1	3-4 (NM_001257392.1,NM_001257391.1,NM_001257401.1,NM_001257400.1); 4-5 (NM_001780.6,NM_001267698.1,NM_001257390.1,NM_001257389.1); 5-6 (XM_024449283.1)	1512
CD63	CD63_03	CD63	NM_001257389.1; NM_001257390.1; NM_001257391.1; NM_001257392.1; NM_001257400.1; NM_001257401.1; NM_001267698.1; NM_001780.6; XM_024449283.1	2-3 (NM_001257392.1,NM_001257391.1,NM_001257401.1,NM_001257400.1); 3-4 (NM_001780.6,NM_001267698.1,NM_001257390.1,NM_001257389.1); 4-5 (XM_024449283.1)	1513
CD63	CD63_04	CD63	NM_001257389.1; NM_001257390.1; NM_001257391.1; NM_001257392.1; NM_001257400.1; NM_001257401.1; NM_001267698.1; NM_001780.6; XM_024449283.1	4 (NM_001257392.1,NM_001257391.1,NM_001257401.1,NM_001257400.1); 5 (NM_001780.6,NM_001267698.1,NM_001257390.1,NM_001257389.1); 6 (XM_024449283.1)	1514
CD63	CD63_05	CD63	NM_001257389.1; NM_001257390.1; NM_001257391.1; NM_001257392.1; NM_001257400.1; NM_001257401.1; NM_001267698.1; NM_001780.6; XM_024449283.1	6-7 (NM_001257392.1,NM_001257391.1,NM_001257401.1,NM_001257400.1); 7-8 (NM_001780.6,NM_001267698.1,NM_001257390.1,NM_001257389.1); 8-9 (XM_024449283.1)	1515
CD68	CD68_01	CD68	NM_001040059.2; NM_001251.3	2 (NM_001251.3,NM_001040059.2)	1516
CD68	CD68_02	CD68	NM_001040059.2; NM_001251.3	2 (NM_001251.3,NM_001040059.2)	1517
CD68	CD68_03	CD68	NM_001040059.2; NM_001251.3	2 (NM_001251.3,NM_001040059.2)	1518
CD68	CD68_04	CD68	NM_001040059.2; NM_001251.3	3-4 (NM_001251.3,NM_001040059.2)	1519
CD68	CD68_05	CD68	NM_001040059.2; NM_001251.3	5 (NM_001251.3,NM_001040059.2)	1520
CD69	CD69_01	CD69	NM_001781.2	5 (NM_001781.2)	1521
CD69	CD69_02	CD69	NM_001781.2	1-2 (NM_001781.2)	1522
CD69	CD69_03	CD69	NM_001781.2	3-4 (NM_001781.2)	1523
CD69	CD69_04	CD69	NM_001781.2	5 (NM_001781.2)	1524
CD69	CD69_05	CD69	NM_001781.2	5 (NM_001781.2)	1525
CD7	CD7_01	CD7	NM_006137.7; XM_011523608.1; XM_017025316.1; XR_001752681.1	4 (NM_006137.7,XM_017025316.1,XM_011523608.1,XR_001752681.1)	1526
CD7	CD7_02	CD7	NM_006137.7; XM_011523608.1; XM_017025316.1; XR_001752680.1; XR_001752681.1	2 (NM_006137.7,XM_017025316.1,XM_011523608.1,XR_001752681.1,XR_001752680.1)	1527
CD7	CD7_03	CD7	NM_006137.7; XM_011523608.1; XM_017025316.1; XR_001752681.1	3-4 (NM_006137.7,XM_017025316.1,XM_011523608.1,XR_001752681.1)	1528
CD7	CD7_04	CD7	NM_006137.7; XM_011523608.1; XM_017025316.1; XR_001752681.1	3-4 (NM_006137.7,XM_017025316.1,XM_011523608.1,XR_001752681.1)	1529
CD7	CD7_05	CD7	NM_006137.7; XM_011523608.1; XM_017025316.1; XR_001752681.1	4 (NM_006137.7,XM_017025316.1,XM_011523608.1,XR_001752681.1)	1530
CD70	CD70_01	CD70	NM_001252.5; NM_001330332.2	1 (NM_001330332.2,NM_001252.5)	1531
CD70	CD70_02	CD70	NM_001252.5	3 (NM_001252.5)	1532
CD70	CD70_03	CD70	NM_001330332.2	4 (NM_001330332.2)	1533
CD70	CD70_04	CD70	NM_001330332.2	4 (NM_001330332.2)	1534
CD70	CD70_05	CD70	NM_001330332.2	4 (NM_001330332.2)	1535
CD74	CD74_01	CD74	NM_001025158.2; NM_001025159.2; NM_001364083.2; NM_001364084.2; NM_004355.3; NR_157074.2; XM_017010089.2; XM_017010090.2; XR_002956198.1	1 (XM_017010090.2,NM_001025159.2,NM_001364083.2,XR_002956198.1,NR_157074.2,NM_001364084.2,XM_017010089.2,NM_001025158.2,NM_004355.3)	1536
CD74	CD74_02	CD74	NM_001025158.2; NM_001025159.2; NM_001364083.2; NM_001364084.2; NM_004355.3; NR_157074.2; XM_017010089.2; XM_017010090.2; XR_002956198.1	1 (XM_017010090.2,NM_001025159.2,NM_001364083.2,XR_002956198.1,NR_157074.2,NM_001364084.2,XM_017010089.2,NM_001025158.2,NM_004355.3)	1537
CD74	CD74_03	CD74	NM_001025158.2; NM_001025159.2; NM_001364084.2; NM_004355.3; NR_157074.2; XM_017010089.2; XM_017010090.2; XR_002956198.1	4-5 (XM_017010090.2,NM_001025159.2,XR_002956198.1,NR_157074.2,NM_001364084.2,XM_017010089.2,NM_001025158.2,NM_004355.3)	1538
CD74	CD74_04	CD74	NM_001025159.2; NM_001364083.2; NM_004355.3; XM_017010089.2; XM_017010090.2; XR_002956198.1	4-5 (NM_001364083.2); 5-6 (XM_017010090.2,NM_001025159.2,XR_002956198.1,XM_017010089.2,NM_004355.3)	1539
CD74	CD74_05	CD74	NM_001025159.2; NM_001364083.2; NM_001364084.2; NM_004355.3; XM_017010089.2; XM_017010090.2; XR_002956198.1	4 (NM_001364083.2); 5 (XM_017010090.2,NM_001025159.2,XR_002956198.1,NM_001364084.2,XM_017010089.2,NM_004355.3)	1540
CD79A	CD79A_01	CD79A	NM_001783.4; NM_021601.4	4-5 (NM_021601.4,NM_001783.4)	1541
CD79A	CD79A_02	CD79A	NM_001783.4; NM_021601.4	4 (NM_021601.4,NM_001783.4)	1542
CD79A	CD79A_03	CD79A	NM_001783.4; NM_021601.4	2 (NM_021601.4,NM_001783.4)	1543
CD79A	CD79A_04	CD79A	NM_001783.4; NM_021601.4	3-4 (NM_021601.4,NM_001783.4)	1544
CD79A	CD79A_05	CD79A	NM_001783.4; NM_021601.4	2 (NM_021601.4,NM_001783.4)	1545
CD79B	CD79B_01	CD79B	NM_000626.4; NM_001039933.3	2-3 (NM_001039933.3,NM_000626.4)	1546
CD79B	CD79B_02	CD79B	NM_000626.4; NM_001039933.3	3 (NM_001039933.3,NM_000626.4)	1547
CD79B	CD79B_03	CD79B	NM_000626.4; NM_001039933.3	2-3 (NM_001039933.3,NM_000626.4)	1548
CD79B	CD79B_04	CD79B	NM_000626.4; NM_001039933.3; NM_001329050.2; NM_021602.4	5 (NM_021602.4,NM_001329050.2); 6 (NM_001039933.3,NM_000626.4)	1549
CD79B	CD79B_05	CD79B	NM_000626.4; NM_001039933.3; NM_001329050.2; NM_021602.4	3-4 (NM_021602.4,NM_001329050.2); 4-5 (NM_001039933.3,NM_000626.4)	1550
CD80	CD80_01	CD80	NM_005191.4	2 (NM_005191.4)	1551
CD80	CD80_02	CD80	NM_005191.4	3 (NM_005191.4)	1552
CD80	CD80_03	CD80	NM_005191.4	1 (NM_005191.4)	1553
CD80	CD80_04	CD80	NM_005191.4	6 (NM_005191.4)	1554
CD80	CD80_05	CD80	NM_005191.4	7 (NM_005191.4)	1555
CD81	CD81_01	CD81	NM_001297649.1; NM_004356.4; XM_011520492.2	2-3 (NM_004356.4,XM_011520492.2,NM_001297649.1)	1556
CD81	CD81_02	CD81	NM_001297649.1; NM_004356.4; XM_011520492.2	8 (NM_004356.4,XM_011520492.2,NM_001297649.1)	1557
CD81	CD81_03	CD81	NM_001297649.1; NM_004356.4; XM_011520492.2	6-7 (NM_004356.4,XM_011520492.2,NM_001297649.1)	1558
CD81	CD81_04	CD81	NM_001297649.1; NM_004356.4; XM_011520492.2	5-6 (NM_004356.4,XM_011520492.2,NM_001297649.1)	1559
CD81	CD81_05	CD81	NM_001297649.1; NM_004356.4; XM_011520492.2	7 (NM_004356.4,XM_011520492.2,NM_001297649.1)	1560
CD83	CD83_01	CD83	NM_001040280.2; NM_001251901.1; NM_004233.4	3-4 (NM_001251901.1,NM_001040280.2,NM_004233.4)	1561
CD83	CD83_02	CD83	NM_001040280.2; NM_001251901.1; NM_004233.4	5 (NM_001251901.1,NM_001040280.2,NM_004233.4)	1562
CD83	CD83_03	CD83	NM_001040280.2; NM_001251901.1; NM_004233.4	5 (NM_001251901.1,NM_001040280.2,NM_004233.4)	1563
CD83	CD83_04	CD83	NM_001040280.2; NM_001251901.1; NM_004233.4	5 (NM_001251901.1,NM_001040280.2,NM_004233.4)	1564
CD83	CD83_05	CD83	NM_001040280.2; NM_001251901.1; NM_004233.4	5 (NM_001251901.1,NM_001040280.2,NM_004233.4)	1565
CD84	CD84_01	CD84	NM_001184879.2; NM_001184881.2; NM_001184882.1; NM_001330742.2; NM_003874.4; XM_011510095.2; XR_002957960.1	6 (NM_001184882.1,XR_002957960.1,NM_001184881.2); 7 (XM_011510095.2,NM_003874.4); 8 (NM_001184879.2,NM_001330742.2)	1566
CD84	CD84_02	CD84	NM_001184879.2; NM_001184881.2; NM_001184882.1; NM_001330742.2; NM_003874.4; XM_011510095.2; XR_002957960.1	6 (NM_001184882.1,XR_002957960.1,NM_001184881.2); 7 (XM_011510095.2,NM_003874.4); 8 (NM_001184879.2,NM_001330742.2)	1567
CD84	CD84_03	CD84	NM_001184879.2; NM_001184881.2; NM_001184882.1; NM_001330742.2; NM_003874.4; XM_011510095.2; XR_002957960.1; XR_921991.3	1 (NM_001184879.2,XM_011510095.2,NM_001184882.1,NM_001330742.2,NM_003874.4,XR_002957960.1,NM_001184881.2,XR_921991.3)	1568
CD84	CD84_04	CD84	NM_001184879.2; NM_001184881.2; NM_001184882.1; NM_001330742.2; NM_003874.4; XM_011510095.2; XR_002957960.1; XR_921991.3	2-3 (XM_011510095.2,NM_001184882.1); 3-4 (NM_001184879.2,NM_001330742.2,NM_003874.4,XR_002957960.1,NM_001184881.2,XR_921991.3)	1569
CD84	CD84_05	CD84	NM_001184879.2; NM_001184881.2; NM_001184882.1; NM_001330742.2; NM_003874.4; XM_011510095.2; XR_002957960.1	6 (NM_001184882.1,XR_002957960.1,NM_001184881.2); 7 (XM_011510095.2,NM_003874.4); 8 (NM_001184879.2,NM_001330742.2)	1570
CD86	CD86_01	CD86	NM_001206924.1; NM_006889.4; NM_175862.5; NM_176892.1	2 (NM_175862.5,NM_176892.1,NM_001206924.1,NM_006889.4)	1571
CD86	CD86_02	CD86	NM_001206924.1; NM_001206925.1; NM_006889.4; NM_175862.5	4 (NM_001206924.1,NM_001206925.1); 5 (NM_175862.5,NM_006889.4)	1572
CD86	CD86_03	CD86	NM_001206924.1; NM_001206925.1; NM_006889.4; NM_175862.5; NM_176892.1	6 (NM_176892.1,NM_001206924.1,NM_001206925.1); 7 (NM_175862.5,NM_006889.4)	1573
CD86	CD86_04	CD86	NM_001206924.1; NM_001206925.1; NM_006889.4; NM_175862.5; NM_176892.1	5-6 (NM_176892.1,NM_001206924.1,NM_001206925.1); 6-7 (NM_175862.5,NM_006889.4)	1574
CD86	CD86_05	CD86	NM_001206924.1; NM_001206925.1; NM_006889.4; NM_175862.5; NM_176892.1	6 (NM_176892.1,NM_001206924.1,NM_001206925.1); 7 (NM_175862.5,NM_006889.4)	1575
CD8A	CD8A_01	CD8A	NM_001145873.1; NM_001768.7; NM_171827.3; NR_027353.1	1 (NM_001768.7,NM_171827.3); 2 (NR_027353.1); 4 (NM_001145873.1)	1576
CD8A	CD8A_02	CD8A	NM_001145873.1; NM_001768.7; NM_171827.3; NR_027353.1	1 (NM_001768.7,NM_171827.3); 2 (NR_027353.1); 4 (NM_001145873.1)	1577
CD8A	CD8A_03	CD8A	NM_001145873.1; NM_001768.7; NM_171827.3; NR_027353.1	2 (NM_001768.7,NM_171827.3); 3 (NR_027353.1); 5 (NM_001145873.1)	1578
CD8A	CD8A_04	CD8A	NM_001145873.1; NM_001768.7; NR_027353.1	4 (NM_001768.7); 5 (NR_027353.1); 7 (NM_001145873.1)	1579
CD8A	CD8A_05	CD8A	NM_001145873.1; NM_001768.7; NR_027353.1	4 (NM_001768.7); 5 (NR_027353.1); 7 (NM_001145873.1)	1580
CD8B	CD8B_01	CD8B	NM_001178100.1; NM_004931.5; NM_172101.4; NM_172102.4; NM_172213.4; XM_011533164.2	1 (NM_172102.4,NM_001178100.1,NM_172101.4,XM_011533164.2,NM_172213.4,NM_004931.5)	1581
CD8B	CD8B_02	CD8B; CD8B2	NM_001178100.1; NM_001349727.2; NM_001368307.2; NM_004931.5; NM_172101.4; NM_172102.4; NM_172213.4; XM_011533164.2; XM_024453217.1	2 (NM_172102.4,NM_001178100.1,NM_172101.4,XM_011533164.2,NM_172213.4,NM_004931.5)	1582
CD8B	CD8B_03	CD8B	NM_001178100.1; NM_004931.5; NM_172101.4; NM_172102.4; NM_172213.4; XM_011533164.2	2 (NM_172102.4,NM_001178100.1,NM_172101.4,XM_011533164.2,NM_172213.4,NM_004931.5)	1583
CD8B	CD8B_04	CD8B; CD8B2	NM_001178100.1; NM_001349727.2; NM_001368307.2; NM_004931.5; NM_172101.4; NM_172102.4; NM_172213.4; XM_011533164.2; XM_024453217.1	2 (NM_172102.4,NM_001178100.1,NM_172101.4,XM_011533164.2,NM_172213.4,NM_004931.5)	1584
CD8B	CD8B_05	CD8B; CD8B2	NM_001178100.1; NM_001349727.2; NM_001368307.2; NM_004931.5; NM_172101.4; NM_172102.4; NM_172213.4; XM_011533164.2; XM_024453217.1	2 (NM_172102.4,NM_001178100.1,NM_172101.4,XM_011533164.2,NM_172213.4,NM_004931.5)	1585
CD9	CD9_01	CD9	NM_001330312.2; NM_001769.4; XM_005253814.4	2 (XM_005253814.4,NM_001330312.2,NM_001769.4)	1586
CD9	CD9_02	CD9	NM_001330312.2; NM_001769.4; XM_005253814.4	5 (XM_005253814.4); 5-6 (NM_001330312.2,NM_001769.4)	1587
CD9	CD9_03	CD9	NM_001330312.2; NM_001769.4; XM_005253814.4	4 (XM_005253814.4,NM_001330312.2,NM_001769.4)	1588
CD9	CD9_04	CD9	NM_001330312.2; NM_001769.4; XM_005253814.4	2 (XM_005253814.4,NM_001330312.2,NM_001769.4)	1589
CD9	CD9_05	CD9	NM_001330312.2; NM_001769.4	8 (NM_001330312.2,NM_001769.4)	1590
CD96	CD96_01	CD96	NM_001318889.2; NM_005816.5; NM_198196.3; NR_134917.2; XM_005247063.3; XM_006713469.3; XM_006713470.3; XM_017005522.1; XR_001739977.1; XR_241462.1; XR_924090.1	5 (XM_017005522.1); 7 (NR_134917.2,XM_006713470.3,NM_005816.5,NM_001318889.2); 8 (XR_241462.1,XR_001739977.1,XR_924090.1,XM_005247063.3,XM_006713469.3,NM_198196.3)	1591
CD96	CD96_02	CD96	NM_005816.5; NM_198196.3; XM_006713469.3; XM_006713470.3; XM_017005521.1; XM_017005522.1	12 (XM_017005522.1); 14 (XM_006713470.3,NM_005816.5,XM_017005521.1); 15 (XM_006713469.3,NM_198196.3)	1592
CD96	CD96_03	CD96	NM_005816.5; NM_198196.3; NR_134917.2; XM_006713469.3; XM_006713470.3; XM_017005521.1; XM_017005522.1; XR_001739977.1; XR_241462.1; XR_924090.1	11-12 (NR_134917.2,XM_006713470.3,NM_005816.5,XM_017005521.1); 12-13 (XR_241462.1,XR_001739977.1,XR_924090.1,XM_006713469.3,NM_198196.3); 9-10 (XM_017005522.1)	1593
CD96	CD96_04	CD96	NM_005816.5; NM_198196.3; XM_006713469.3; XM_006713470.3; XM_017005521.1; XM_017005522.1	12 (XM_017005522.1); 14 (XM_006713470.3,NM_005816.5,XM_017005521.1); 15 (XM_006713469.3,NM_198196.3)	1594
CD96	CD96_05	CD96	NM_001318889.2; NM_005816.5; NM_198196.3; NR_134917.2; XM_005247063.3; XM_006713469.3; XM_006713470.3; XM_017005521.1; XR_001739977.1; XR_241462.1; XR_924090.1	4 (NR_134917.2,XM_006713470.3,NM_005816.5,NM_001318889.2); 5 (XR_241462.1,XR_001739977.1,XR_924090.1,XM_005247063.3,XM_006713469.3,NM_198196.3,XM_017005521.1)	1595
CD99	CD99_01	CD99	NM_001122898.3; NM_001321367.2; NM_001321368.2; NM_001321369.2; NM_001321370.2; NM_002414.5; NR_135623.2	7 (NM_001321370.2,NM_001122898.3,NM_001321369.2); 8 (NR_135623.2,NM_002414.5,NM_001321367.2,NM_001321368.2)	1596
CD99	CD99_02	CD99	NM_001122898.3; NM_001321367.2; NM_001321368.2; NM_001321369.2; NM_001321370.2; NM_002414.5; NR_135623.2	4 (NM_001122898.3,NM_001321369.2); 5 (NR_135623.2,NM_001321370.2,NM_002414.5,NM_001321367.2,NM_001321368.2)	1597
CD99	CD99_03	CD99	NM_001122898.3; NM_001321367.2; NM_001321368.2; NM_001321369.2; NM_001321370.2; NM_002414.5; NR_135623.2	7 (NM_001321370.2,NM_001122898.3,NM_001321369.2); 8 (NR_135623.2,NM_002414.5,NM_001321367.2,NM_001321368.2)	1598
CD99	CD99_04	CD99	NM_001122898.3; NM_001321367.2; NM_001321368.2; NM_001321369.2; NM_001321370.2; NM_002414.5; NR_135623.2	3-4 (NM_001122898.3,NM_001321369.2); 4-5 (NR_135623.2,NM_001321370.2,NM_002414.5,NM_001321367.2,NM_001321368.2)	1599
CDC14A	CDC14A_01	CDC14A	NM_001319210.2; NM_001319211.1; NM_001319212.1; NM_003672.4; NM_033312.2; NM_033313.2; XM_005271294.3; XM_005271296.3; XM_011542340.2; XM_011542341.3; XM_011542345.3; XM_017002646.1; XM_017002647.1; XM_024450503.1; XM_024450504.1; XM_024450505.1; XR_002957887.1; XR_002957888.1	2 (XM_011542345.3); 3 (XM_011542341.3,XM_024450505.1); 4 (NM_001319211.1,XM_005271294.3,NM_001319212.1,NM_033312.2,XM_017002647.1,XM_024450504.1,XM_024450503.1,NM_033313.2,NM_003672.4,XM_017002646.1,XR_002957887.1,XM_005271296.3,XM_011542340.2,XR_002957888.1,NM_001319210.2)	1600
CDC14A	CDC14A_02	CDC14A	NM_001319210.2; NM_001319211.1; NM_001319212.1; NM_003672.4; NM_033312.2; NM_033313.2; XM_005271294.3; XM_005271296.3; XM_011542340.2; XM_011542341.3; XM_011542345.3; XM_017002646.1; XM_017002647.1; XM_024450503.1; XM_024450504.1; XM_024450505.1; XM_024450506.1; XR_002957887.1; XR_002957888.1	10 (XM_024450504.1); 5 (XM_024450506.1); 6 (XM_011542345.3); 7 (XM_024450505.1); 8 (NM_001319212.1,XM_011542341.3); 9 (NM_001319211.1,XM_005271294.3,NM_033312.2,XM_017002647.1,XM_024450503.1,NM_033313.2,NM_003672.4,XM_017002646.1,XR_002957887.1,XM_005271296.3,XM_011542340.2,XR_002957888.1,NM_001319210.2)	1601
CDC14A	CDC14A_03	CDC14A	NM_001319210.2; NM_001319211.1; NM_001319212.1; NM_003672.4; NM_033312.2; XM_005271294.3; XM_005271296.3; XM_011542340.2; XM_011542341.3; XM_011542345.3; XM_024450503.1; XM_024450504.1; XM_024450505.1; XM_024450506.1; XR_002957887.1; XR_002957888.1	11 (XM_024450506.1); 12 (XM_011542345.3); 13 (XM_024450505.1); 14 (NM_001319212.1,XM_011542341.3); 15 (NM_001319211.1,XM_005271294.3,NM_033312.2,XM_024450503.1,NM_003672.4,XM_005271296.3,XM_011542340.2,NM_001319210.2); 16 (XM_024450504.1,XR_002957887.1,XR_002957888.1)	1602
CDC14A	CDC14A_04	CDC14A	NM_001319210.2; NM_001319211.1; NM_001319212.1; NM_003672.4; NM_033312.2; NM_033313.2; XM_005271294.3; XM_005271296.3; XM_011542340.2; XM_011542341.3; XM_011542345.3; XM_017002646.1; XM_017002647.1; XM_024450503.1; XM_024450504.1; XM_024450505.1; XM_024450506.1; XR_002957887.1; XR_002957888.1	10 (XM_024450504.1); 5 (XM_024450506.1); 6 (XM_011542345.3); 7 (XM_024450505.1); 8 (NM_001319212.1,XM_011542341.3); 9 (NM_001319211.1,XM_005271294.3,NM_033312.2,XM_017002647.1,XM_024450503.1,NM_033313.2,NM_003672.4,XM_017002646.1,XR_002957887.1,XM_005271296.3,XM_011542340.2,XR_002957888.1,NM_001319210.2)	1603
CDC14A	CDC14A_05	CDC14A	NM_001319210.2; NM_001319211.1; NM_001319212.1; NM_003672.4; NM_033312.2; NM_033313.2; XM_005271294.3; XM_005271296.3; XM_011542340.2; XM_017002646.1; XM_017002647.1; XM_024450503.1; XM_024450504.1; XR_002957887.1; XR_002957888.1	2 (NM_001319211.1,XM_005271294.3,NM_001319212.1,NM_033312.2,XM_017002647.1,XM_024450504.1,XM_024450503.1,NM_033313.2,NM_003672.4,XM_017002646.1,XR_002957887.1,XM_005271296.3,XM_011542340.2,XR_002957888.1,NM_001319210.2)	1604
CDC14B	CDC14B_01	CDC14B	NM_001077181.3; NM_001351569.2; NM_001351570.1; NM_003671.5; NM_033331.4; NR_147239.2; XM_011519148.3; XM_011519153.3; XM_011519156.3; XM_011519159.3; XM_017015240.2; XM_017015241.2; XM_017015242.2; XM_017015244.2; XM_017015247.2; XM_017015248.2	10 (XM_017015248.2); 12 (XM_017015241.2); 13 (XM_011519153.3,NM_003671.5,XM_017015247.2); 14 (NM_033331.4,XM_011519148.3,NM_001077181.3,NM_001351569.2,NM_001351570.1,XM_011519159.3); 15 (XM_017015244.2,NR_147239.2,XM_017015242.2,XM_017015240.2,XM_011519156.3)	1605
CDC14B	CDC14B_02	CDC14B	NM_001077181.3; NM_001351569.2; NM_001351570.1; NM_003671.5; NM_033331.4; NR_147239.2; XM_011519148.3; XM_011519153.3; XM_011519156.3; XM_011519159.3; XM_017015240.2; XM_017015241.2; XM_017015242.2; XM_017015244.2; XM_017015247.2; XM_017015248.2	10 (XM_017015248.2); 12 (XM_017015241.2); 13 (XM_011519153.3,NM_003671.5,XM_017015247.2); 14 (NM_033331.4,XM_011519148.3,NM_001077181.3,NM_001351569.2,NM_001351570.1,XM_011519159.3); 15 (XM_017015244.2,NR_147239.2,XM_017015242.2,XM_017015240.2,XM_011519156.3)	1606
CDC14B	CDC14B_03	CDC14B	NM_001077181.3; NM_001351569.2; NM_001351570.1; NM_003671.5; NM_033331.4; NR_147239.2; XM_011519148.3; XM_011519153.3; XM_011519156.3; XM_011519159.3; XM_017015240.2; XM_017015241.2; XM_017015242.2; XM_017015244.2; XM_017015247.2; XM_017015248.2	10 (XM_017015248.2); 12 (XM_017015241.2); 13 (XM_011519153.3,NM_003671.5,XM_017015247.2); 14 (NM_033331.4,XM_011519148.3,NM_001077181.3,NM_001351569.2,NM_001351570.1,XM_011519159.3); 15 (XM_017015244.2,NR_147239.2,XM_017015242.2,XM_017015240.2,XM_011519156.3)	1607
CDC14B	CDC14B_04	CDC14B	NM_001077181.3; NM_001351569.2; NM_001351570.1; NM_003671.5; NM_033331.4; NR_147239.2; XM_011519148.3; XM_011519153.3; XM_011519156.3; XM_011519159.3; XM_017015240.2; XM_017015241.2; XM_017015242.2; XM_017015244.2; XM_017015247.2; XM_017015248.2	10 (XM_017015248.2); 12 (XM_017015241.2); 13 (XM_011519153.3,NM_003671.5,XM_017015247.2); 14 (NM_033331.4,XM_011519148.3,NM_001077181.3,NM_001351569.2,NM_001351570.1,XM_011519159.3); 15 (XM_017015244.2,NR_147239.2,XM_017015242.2,XM_017015240.2,XM_011519156.3)	1608
CDC14B	CDC14B_05	CDC14B	NM_001077181.3; NM_001351569.2; NM_001351570.1; NM_003671.5; NM_033331.4; NR_147239.2; XM_011519148.3; XM_011519153.3; XM_011519156.3; XM_011519159.3; XM_017015240.2; XM_017015241.2; XM_017015242.2; XM_017015244.2; XM_017015247.2; XM_017015248.2	10 (XM_017015248.2); 12 (XM_017015241.2); 13 (XM_011519153.3,NM_003671.5,XM_017015247.2); 14 (NM_033331.4,XM_011519148.3,NM_001077181.3,NM_001351569.2,NM_001351570.1,XM_011519159.3); 15 (XM_017015244.2,NR_147239.2,XM_017015242.2,XM_017015240.2,XM_011519156.3)	1609
CDC20	CDC20_01	CDC20	NM_001255.3	10 (NM_001255.3)	1610
CDC20	CDC20_02	CDC20	NM_001255.3	6 (NM_001255.3)	1611
CDC20	CDC20_03	CDC20	NM_001255.3	7-8 (NM_001255.3)	1612
CDC20	CDC20_04	CDC20	NM_001255.3	4-5 (NM_001255.3)	1613
CDC20	CDC20_05	CDC20	NM_001255.3	5-6 (NM_001255.3)	1614
CDC25A	CDC25A_01	CDC25A	NM_001789.3; NM_201567.2; XM_006713434.3; XM_006713435.3; XR_001740392.2	1-2 (XR_001740392.2,NM_001789.3,XM_006713434.3,XM_006713435.3,NM_201567.2)	1615
CDC25A	CDC25A_02	CDC25A	NM_001789.3; NM_201567.2; XM_006713434.3; XM_006713435.3; XR_001740392.2	7-8 (XM_006713435.3,NM_201567.2); 8-9 (XR_001740392.2,NM_001789.3,XM_006713434.3)	1616
CDC25A	CDC25A_03	CDC25A	NM_001789.3; NM_201567.2; XM_006713434.3; XM_006713435.3; XR_001740392.2	14 (XM_006713435.3,NM_201567.2); 15 (XR_001740392.2,NM_001789.3,XM_006713434.3)	1617
CDC25A	CDC25A_04	CDC25A	NM_001789.3; NM_201567.2; XM_006713434.3; XM_006713435.3; XR_001740392.2	5 (XR_001740392.2,NM_001789.3,XM_006713434.3,XM_006713435.3,NM_201567.2)	1618
CDC25A	CDC25A_05	CDC25A	NM_001789.3; NM_201567.2; XM_006713434.3; XM_006713435.3; XR_001740392.2	14 (XM_006713435.3,NM_201567.2); 15 (XR_001740392.2,NM_001789.3,XM_006713434.3)	1619
CDC25B	CDC25B_01	CDC25B	NM_001287516.1; NM_001287517.1; NM_001287518.1; NM_001287519.1; NM_001287520.1; NM_001287522.1; NM_001287524.1; NM_004358.4; NM_021872.3; NM_021873.3; NR_136335.1; NR_136336.1; XR_937181.3	1-2 (NM_001287524.1); 4-5 (NR_136335.1,NM_001287520.1,NM_001287517.1,XR_937181.3,NM_021873.3,NM_021872.3,NM_004358.4,NM_001287519.1,NR_136336.1,NM_001287518.1,NM_001287516.1,NM_001287522.1)	1620
CDC25B	CDC25B_02	CDC25B	NM_001287516.1; NM_001287517.1; NM_001287518.1; NM_001287519.1; NM_001287520.1; NM_001287522.1; NM_001287524.1; NM_004358.4; NM_021872.3; NM_021873.3; NR_136335.1; NR_136336.1; XR_937181.3	12 (NM_001287524.1); 15 (NM_021872.3,NM_001287518.1,NM_001287522.1); 16 (NM_001287520.1,NM_001287517.1,NM_021873.3,NM_004358.4,NM_001287519.1,NM_001287516.1); 17 (NR_136335.1,XR_937181.3,NR_136336.1)	1621
CDC25B	CDC25B_03	CDC25B	NM_001287516.1; NM_001287517.1; NM_001287518.1; NM_001287519.1; NM_001287520.1; NM_001287522.1; NM_001287524.1; NM_004358.4; NM_021872.3; NM_021873.3; NR_136335.1; NR_136336.1; XR_937181.3	12 (NM_001287524.1); 15 (NM_021872.3,NM_001287518.1,NM_001287522.1); 16 (NM_001287520.1,NM_001287517.1,NM_021873.3,NM_004358.4,NM_001287519.1,NM_001287516.1); 17 (NR_136335.1,XR_937181.3,NR_136336.1)	1622
CDC25B	CDC25B_04	CDC25B	NM_001287516.1; NM_001287517.1; NM_001287518.1; NM_001287519.1; NM_001287520.1; NM_001287522.1; NM_001287524.1; NM_004358.4; NM_021872.3; NM_021873.3; NR_136335.1; NR_136336.1; XR_937181.3	10 (NM_021872.3,NM_001287518.1,NM_001287522.1); 11 (NR_136335.1,NM_001287520.1,NM_001287517.1,XR_937181.3,NM_021873.3,NM_004358.4,NM_001287519.1,NR_136336.1,NM_001287516.1); 7 (NM_001287524.1)	1623
CDC25B	CDC25B_05	CDC25B	NM_001287516.1; NM_001287517.1; NM_001287518.1; NM_001287519.1; NM_001287520.1; NM_001287522.1; NM_001287524.1; NM_004358.4; NM_021872.3; NM_021873.3; NR_136335.1; NR_136336.1; XR_937181.3	10-11 (NM_001287524.1); 13-14 (NM_021872.3,NM_001287518.1,NM_001287522.1); 14-15 (NM_001287520.1,NM_001287517.1,NM_021873.3,NM_004358.4,NM_001287519.1,NM_001287516.1); 15-16 (NR_136335.1,XR_937181.3,NR_136336.1)	1624
CDC25C	CDC25C_01	CDC25C	NM_001287582.2; NM_001287583.2; NM_001318098.2; NM_001364026.1; NM_001364027.1; NM_001364028.1; NM_001790.5; NM_022809.3; XM_005272145.3; XM_011543759.3; XM_011543760.2; XM_011543761.2; XM_011543762.1; XM_011543764.1	2 (NM_001790.5,NM_001287583.2,XM_005272145.3,NM_001287582.2,NM_001364027.1,NM_022809.3,NM_001318098.2,XM_011543760.2,NM_001364026.1,XM_011543762.1,XM_011543761.2,NM_001364028.1); 3 (XM_011543759.3)	1625
CDC25C	CDC25C_02	CDC25C	NM_001287582.2; NM_001287583.2; NM_001318098.2; NM_001364026.1; NM_001364027.1; NM_001364028.1; NM_001790.5; NM_022809.3; XM_005272145.3; XM_011543759.3; XM_011543760.2; XM_011543761.2; XM_011543762.1; XM_011543764.1	1 (XM_011543764.1); 2 (NM_001790.5,NM_001287583.2,XM_005272145.3,NM_001287582.2,NM_001364027.1,NM_022809.3,NM_001318098.2,XM_011543760.2,NM_001364026.1,XM_011543762.1,XM_011543761.2,NM_001364028.1); 3 (XM_011543759.3)	1626
CDC25C	CDC25C_03	CDC25C	NM_001287582.2; NM_001287583.2; NM_001318098.2; NM_001364026.1; NM_001364027.1; NM_001364028.1; NM_001790.5; NM_022809.3; XM_005272145.3; XM_006714739.3; XM_011543759.3; XM_011543760.2; XM_011543761.2; XM_011543762.1; XM_011543763.1; XM_011543764.1	4 (NM_022809.3,XM_011543762.1,XM_011543761.2,XM_011543764.1); 5 (NM_001364028.1,XM_011543763.1); 6 (XM_006714739.3); 7 (NM_001790.5,NM_001287583.2,XM_005272145.3,NM_001287582.2,NM_001364027.1,NM_001318098.2,XM_011543760.2,NM_001364026.1); 8 (XM_011543759.3)	1627
CDC25C	CDC25C_04	CDC25C	NM_001287582.2; NM_001287583.2; NM_001318098.2; NM_001364026.1; NM_001364027.1; NM_001364028.1; NM_001790.5; NM_022809.3; XM_005272145.3; XM_006714739.3; XM_011543759.3; XM_011543760.2; XM_011543761.2; XM_011543762.1; XM_011543763.1; XM_011543764.1	4 (NM_022809.3,XM_011543762.1,XM_011543761.2,XM_011543764.1); 5 (NM_001364028.1,XM_011543763.1); 6 (XM_006714739.3); 7 (NM_001790.5,NM_001287583.2,XM_005272145.3,NM_001287582.2,NM_001364027.1,NM_001318098.2,XM_011543760.2,NM_001364026.1); 8 (XM_011543759.3)	1628
CDC25C	CDC25C_05	CDC25C	NM_001287582.2; NM_001287583.2; NM_001318098.2; NM_001364026.1; NM_001364027.1; NM_001364028.1; NM_001790.5; NM_022809.3; XM_005272145.3; XM_006714739.3; XM_011543759.3; XM_011543760.2; XM_011543761.2; XM_011543762.1; XM_011543763.1; XM_011543764.1	10 (XM_005272145.3,NM_001364027.1,NM_001364026.1,XM_006714739.3); 11 (NM_001790.5,NM_001287583.2,NM_001287582.2,NM_001318098.2); 12 (XM_011543759.3); 8 (NM_022809.3,XM_011543762.1,XM_011543761.2,XM_011543764.1); 9 (XM_011543760.2,NM_001364028.1,XM_011543763.1)	1629
CDC6	CDC6_01	CDC6	NM_001254.4; XM_011525541.2; XM_011525542.1	2 (XM_011525542.1,XM_011525541.2,NM_001254.4)	1630
CDC6	CDC6_02	CDC6	NM_001254.4; XM_011525541.2; XM_011525542.1	10 (NM_001254.4); 11 (XM_011525542.1,XM_011525541.2)	1631
CDC6	CDC6_03	CDC6	NM_001254.4; XM_011525541.2; XM_011525542.1	3 (XM_011525542.1,XM_011525541.2,NM_001254.4)	1632
CDC6	CDC6_04	CDC6	NM_001254.4; XM_011525541.2; XM_011525542.1	7-8 (XM_011525542.1,XM_011525541.2,NM_001254.4)	1633
CDC6	CDC6_05	CDC6	NM_001254.4; XM_011525541.2; XM_011525542.1	10-11 (XM_011525542.1,XM_011525541.2); 9-10 (NM_001254.4)	1634
CDC7	CDC7_01	CDC7	NM_001134419.1; NM_001134420.1; NM_003503.4; XM_005271241.2; XM_005271244.3; XM_017002425.2; XM_017002426.1; XM_017002427.2; XM_024450089.1; XM_024450090.1; XR_001737461.1; XR_001737462.1	2-3 (XM_017002427.2); 3-4 (XR_001737462.1,XM_017002425.2,NM_001134419.1,NM_001134420.1,XM_017002426.1,XM_005271244.3,XM_024450089.1,XM_024450090.1,NM_003503.4,XM_005271241.2,XR_001737461.1)	1635
CDC7	CDC7_02	CDC7	NM_001134419.1; NM_001134420.1; NM_003503.4; XM_005271241.2; XM_005271244.3; XM_017002425.2; XM_017002426.1; XM_017002427.2; XM_024450089.1; XM_024450090.1; XR_001737461.1; XR_001737462.1	11 (XM_017002425.2,XM_017002426.1,XM_005271244.3,XM_017002427.2); 12 (XR_001737462.1,NM_001134419.1,NM_001134420.1,XM_024450089.1,XM_024450090.1,NM_003503.4,XM_005271241.2,XR_001737461.1)	1636
CDC7	CDC7_03	CDC7	NM_001134419.1; NM_001134420.1; NM_003503.4; XM_005271241.2; XM_005271244.3; XM_017002425.2; XM_017002426.1; XM_017002427.2; XM_024450089.1; XM_024450090.1; XR_001737461.1; XR_001737462.1	6 (XM_017002427.2); 7 (XR_001737462.1,XM_017002425.2,NM_001134419.1,NM_001134420.1,XM_017002426.1,XM_005271244.3,XM_024450089.1,XM_024450090.1,NM_003503.4,XM_005271241.2,XR_001737461.1)	1637
CDC7	CDC7_04	CDC7	NM_001134419.1; NM_001134420.1; NM_003503.4; XM_005271241.2; XM_005271244.3; XM_017002425.2; XM_017002426.1; XM_017002427.2; XM_024450089.1; XM_024450090.1; XR_001737461.1; XR_001737462.1	5-6 (XM_017002427.2); 6-7 (XR_001737462.1,XM_017002425.2,NM_001134419.1,NM_001134420.1,XM_017002426.1,XM_005271244.3,XM_024450089.1,XM_024450090.1,NM_003503.4,XM_005271241.2,XR_001737461.1)	1638
CDC7	CDC7_05	CDC7	NM_001134419.1; NM_001134420.1; NM_003503.4; XM_005271241.2; XM_005271244.3; XM_017002425.2; XM_017002426.1; XM_017002427.2; XM_024450089.1; XM_024450090.1; XR_001737461.1; XR_001737462.1	11 (XM_017002425.2,XM_017002426.1,XM_005271244.3,XM_017002427.2); 12 (XR_001737462.1,NM_001134419.1,NM_001134420.1,XM_024450089.1,XM_024450090.1,NM_003503.4,XM_005271241.2,XR_001737461.1)	1639
CDH1	CDH1_01	CDH1	NM_001317184.2; NM_001317185.2; NM_001317186.2; NM_004360.5	8-9 (NM_004360.5,NM_001317186.2,NM_001317185.2,NM_001317184.2)	1640
CDH1	CDH1_02	CDH1	NM_001317184.2; NM_001317185.2; NM_001317186.2; NM_004360.5	15 (NM_001317186.2,NM_001317184.2); 16 (NM_004360.5,NM_001317185.2)	1641
CDH1	CDH1_03	CDH1	NM_001317184.2; NM_001317185.2; NM_001317186.2; NM_004360.5	3 (NM_004360.5,NM_001317186.2,NM_001317185.2,NM_001317184.2)	1642
CDH1	CDH1_04	CDH1	NM_001317184.2; NM_001317185.2; NM_001317186.2; NM_004360.5	10 (NM_004360.5,NM_001317186.2,NM_001317185.2); 9 (NM_001317184.2)	1643
CDH1	CDH1_05	CDH1	NM_001317184.2; NM_001317185.2; NM_001317186.2; NM_004360.5	15 (NM_001317186.2,NM_001317184.2); 16 (NM_004360.5,NM_001317185.2)	1644
CDH11	CDH11_01	CDH11	NM_001308392.2; NM_001330576.2; NM_001797.4; XM_005255762.2; XM_005255763.3; XM_011522803.2; XM_024450134.1	10-11 (XM_005255763.3,NM_001308392.2,XM_005255762.2,NM_001797.4); 11-12 (XM_024450134.1); 9-10 (NM_001330576.2,XM_011522803.2)	1645
CDH11	CDH11_02	CDH11	NM_001308392.2; NM_001330576.2; NM_001797.4	12 (NM_001330576.2); 13 (NM_001797.4); 14 (NM_001308392.2)	1646
CDH11	CDH11_03	CDH11	NM_001308392.2; NM_001330576.2; NM_001797.4	12 (NM_001330576.2); 13 (NM_001797.4); 14 (NM_001308392.2)	1647
CDH11	CDH11_04	CDH11	NM_001308392.2; NM_001330576.2; NM_001797.4	12 (NM_001330576.2); 13 (NM_001797.4); 14 (NM_001308392.2)	1648
CDH11	CDH11_05	CDH11	NM_001308392.2; NM_001330576.2; NM_001797.4	12 (NM_001330576.2); 13 (NM_001797.4); 14 (NM_001308392.2)	1649
CDH2	CDH2_01	CDH2	NM_001308176.2; NM_001792.5; XM_011525788.1; XM_017025514.2	4-5 (NM_001308176.2); 5-6 (NM_001792.5,XM_011525788.1,XM_017025514.2)	1650
CDH2	CDH2_02	CDH2	NM_001308176.2; NM_001792.5; XM_011525788.1; XM_017025514.2	2 (NM_001308176.2); 3 (NM_001792.5,XM_011525788.1,XM_017025514.2)	1651
CDH2	CDH2_03	CDH2	NM_001308176.2; NM_001792.5; XM_011525788.1; XM_017025514.2	10 (NM_001792.5,XM_011525788.1,XM_017025514.2); 9 (NM_001308176.2)	1652
CDH2	CDH2_04	CDH2	NM_001308176.2; NM_001792.5; XM_011525788.1; XM_017025514.2	10 (NM_001792.5,XM_011525788.1,XM_017025514.2); 9 (NM_001308176.2)	1653
CDH2	CDH2_05	CDH2	NM_001308176.2; NM_001792.5; XM_011525788.1; XM_017025514.2	2 (NM_001308176.2); 3 (NM_001792.5,XM_011525788.1,XM_017025514.2)	1654
CDH3	CDH3_01	CDH3	NM_001317195.2; NM_001317196.2; NM_001793.6; XM_011522800.3	2-3 (NM_001317196.2); 3-4 (NM_001793.6,XM_011522800.3,NM_001317195.2)	1655
CDH3	CDH3_02	CDH3	NM_001317195.2; NM_001317196.2; NM_001793.6; XM_011522800.3	3 (NM_001317196.2); 4 (NM_001793.6,XM_011522800.3,NM_001317195.2)	1656
CDH3	CDH3_03	CDH3	NM_001317195.2; NM_001317196.2; NM_001793.6; XM_011522800.3	10 (NM_001793.6,XM_011522800.3,NM_001317195.2); 9 (NM_001317196.2)	1657
CDH3	CDH3_04	CDH3	NM_001317195.2; NM_001317196.2; NM_001793.6; XM_011522800.3	4 (NM_001317196.2); 5 (NM_001793.6,XM_011522800.3,NM_001317195.2)	1658
CDH3	CDH3_05	CDH3	NM_001317195.2; NM_001317196.2; NM_001793.6; XM_011522800.3	14 (NM_001317196.2); 15 (NM_001793.6,XM_011522800.3,NM_001317195.2)	1659
CDH5	CDH5_01	CDH5	NM_001795.5; XM_011522801.2; XM_024450133.1	11 (XM_024450133.1); 12 (NM_001795.5,XM_011522801.2)	1660
CDH5	CDH5_02	CDH5	NM_001795.5; XM_011522801.2; XM_024450133.1	11 (XM_024450133.1); 12 (NM_001795.5,XM_011522801.2)	1661
CDH5	CDH5_03	CDH5	NM_001795.5; XM_011522801.2; XM_024450133.1	6-7 (XM_024450133.1); 7-8 (NM_001795.5,XM_011522801.2)	1662
CDH5	CDH5_04	CDH5	NM_001795.5; XM_011522801.2; XM_024450133.1	1 (XM_024450133.1); 2 (NM_001795.5,XM_011522801.2)	1663
CDH5	CDH5_05	CDH5	NM_001795.5; XM_011522801.2; XM_024450133.1	3-4 (XM_024450133.1); 4-5 (NM_001795.5,XM_011522801.2)	1664
CDK1	CDK1_01	CDK1	NM_001170406.1; NM_001170407.1; NM_001320918.1; NM_001786.5; NM_033379.4; XM_005270303.3	1-2 (NM_001170407.1,NM_001786.5,NM_033379.4,XM_005270303.3,NM_001170406.1,NM_001320918.1)	1665
CDK1	CDK1_02	CDK1	NM_001320918.1; NM_001786.5; NM_033379.4; XM_005270303.3	5 (NM_033379.4); 6 (NM_001786.5,XM_005270303.3,NM_001320918.1)	1666
CDK1	CDK1_03	CDK1	NM_001320918.1; NM_001786.5; NM_033379.4; XM_005270303.3	7 (NM_033379.4); 8 (NM_001786.5,XM_005270303.3,NM_001320918.1)	1667
CDK1	CDK1_04	CDK1	NM_001170406.1; NM_001170407.1; NM_001320918.1; NM_001786.5; NM_033379.4; XM_005270303.3	1-2 (NM_001170407.1,NM_001786.5,NM_033379.4,XM_005270303.3,NM_001170406.1,NM_001320918.1)	1668
CDK1	CDK1_05	CDK1	NM_001170407.1; NM_001786.5; NM_033379.4; XM_005270303.3	1 (NM_001170407.1,NM_033379.4)	1669
CDK2	CDK2_01	CDK2	NM_001290230.2; NM_001798.5; NM_052827.4; XM_011537732.2	5 (NM_001290230.2); 6 (NM_052827.4); 7 (NM_001798.5); 8 (XM_011537732.2)	1670
CDK2	CDK2_02	CDK2	NM_001290230.2; NM_001798.5; NM_052827.4; XM_011537732.2	5 (NM_001290230.2); 6 (NM_052827.4); 7 (NM_001798.5); 8 (XM_011537732.2)	1671
CDK2	CDK2_03	CDK2	NM_001290230.2; NM_001798.5; NM_052827.4; XM_011537732.2	5 (NM_001290230.2); 6 (NM_052827.4); 7 (NM_001798.5); 8 (XM_011537732.2)	1672
CDK2	CDK2_04	CDK2	NM_001290230.2; NM_001798.5; NM_052827.4; XM_011537732.2	4 (NM_001290230.2); 5 (NM_052827.4); 6 (NM_001798.5); 7 (XM_011537732.2)	1673
CDK2	CDK2_05	CDK2	NM_001290230.2; NM_001798.5; NM_052827.4; XM_011537732.2	1 (NM_001798.5,XM_011537732.2,NM_001290230.2,NM_052827.4)	1674
CDK4	CDK4_01	CDK4	NM_000075.4	6-7 (NM_000075.4)	1675
CDK4	CDK4_02	CDK4	NM_000075.4	2-3 (NM_000075.4)	1676
CDK4	CDK4_03	CDK4	NM_000075.4	8 (NM_000075.4)	1677
CDK4	CDK4_04	CDK4	NM_000075.4	2 (NM_000075.4)	1678
CDK4	CDK4_05	CDK4	NM_000075.4	6-7 (NM_000075.4)	1679
CDK6	CDK6_01	CDK6	NM_001145306.2; NM_001259.8; XM_006715835.2	1-2 (NM_001259.8,NM_001145306.2,XM_006715835.2)	1680
CDKN1A	CDKN1A_01	CDKN1A	NM_000389.5; NM_001220777.2; NM_001220778.2; NM_001291549.3; NM_001374509.1; NM_001374510.1; NM_001374511.1; NM_001374512.1; NM_001374513.1; NM_078467.3	3 (NM_001220778.2,NM_001374512.1,NM_001374511.1,NM_001374510.1,NM_001220777.2,NM_001374513.1,NM_000389.5); 4 (NM_001374509.1,NM_001291549.3,NM_078467.3)	1681
CDKN1A	CDKN1A_02	CDKN1A	NM_000389.5; NM_001220777.2; NM_001220778.2; NM_001291549.3; NM_001374509.1; NM_001374510.1; NM_001374511.1; NM_001374512.1; NM_001374513.1; NM_078467.3	2 (NM_001220778.2,NM_001374512.1,NM_001374511.1,NM_001374510.1,NM_001220777.2,NM_001374513.1,NM_000389.5); 3 (NM_001374509.1,NM_001291549.3,NM_078467.3)	1682
CDKN1A	CDKN1A_03	CDKN1A	NM_000389.5; NM_001220777.2; NM_001220778.2; NM_001291549.3; NM_001374509.1; NM_001374510.1; NM_001374511.1; NM_001374512.1; NM_001374513.1; NM_078467.3	2 (NM_001220778.2,NM_001374512.1,NM_001374511.1,NM_001374510.1,NM_001220777.2,NM_001374513.1,NM_000389.5); 3 (NM_001374509.1,NM_001291549.3,NM_078467.3)	1683
CDKN1A	CDKN1A_04	CDKN1A	NM_000389.5; NM_001220777.2; NM_001220778.2; NM_001291549.3; NM_001374509.1; NM_001374510.1; NM_001374511.1; NM_001374512.1; NM_001374513.1; NM_078467.3	3 (NM_001220778.2,NM_001374512.1,NM_001374511.1,NM_001374510.1,NM_001220777.2,NM_001374513.1,NM_000389.5); 4 (NM_001374509.1,NM_001291549.3,NM_078467.3)	1684
CDKN1A	CDKN1A_05	CDKN1A	NM_000389.5; NM_001220777.2; NM_001220778.2; NM_001291549.3; NM_001374509.1; NM_001374510.1; NM_001374511.1; NM_001374512.1; NM_001374513.1; NM_078467.3	2 (NM_001220778.2,NM_001374512.1,NM_001374511.1,NM_001374510.1,NM_001220777.2,NM_001374513.1,NM_000389.5); 3 (NM_001374509.1,NM_001291549.3,NM_078467.3)	1685
CDKN1B	CDKN1B_01	CDKN1B	NM_004064.5	1 (NM_004064.5)	1686
CDKN1B	CDKN1B_02	CDKN1B	NM_004064.5	1 (NM_004064.5)	1687
CDKN1B	CDKN1B_03	CDKN1B	NM_004064.5	1 (NM_004064.5)	1688
CDKN1B	CDKN1B_04	CDKN1B	NM_004064.5	1 (NM_004064.5)	1689
CDKN1B	CDKN1B_05	CDKN1B	NM_004064.5	1 (NM_004064.5)	1690
CDKN1C	CDKN1C_01	CDKN1C	NM_000076.2; NM_001122630.2; NM_001122631.2; NM_001362474.2; NM_001362475.2	1 (NM_000076.2,NM_001362474.2); 2 (NM_001122630.2,NM_001122631.2,NM_001362475.2)	1691
CDKN1C	CDKN1C_02	CDKN1C	NM_000076.2; NM_001122630.2; NM_001122631.2; NM_001362474.2; NM_001362475.2	1 (NM_000076.2,NM_001362474.2); 2 (NM_001122630.2,NM_001122631.2,NM_001362475.2)	1692
CDKN1C	CDKN1C_03	CDKN1C	NM_000076.2; NM_001122630.2; NM_001122631.2; NM_001362474.2; NM_001362475.2	1 (NM_000076.2,NM_001362474.2); 2 (NM_001122630.2,NM_001122631.2,NM_001362475.2)	1693
CDKN1C	CDKN1C_04	CDKN1C	NM_000076.2; NM_001122630.2; NM_001122631.2; NM_001362474.2; NM_001362475.2	1 (NM_000076.2,NM_001362474.2); 2 (NM_001122630.2,NM_001122631.2,NM_001362475.2)	1694
CDKN1C	CDKN1C_05	CDKN1C	NM_000076.2; NM_001122630.2; NM_001122631.2; NM_001362474.2; NM_001362475.2	1-2 (NM_000076.2,NM_001362474.2); 2-3 (NM_001122630.2,NM_001122631.2,NM_001362475.2)	1695
CDKN2A	CDKN2A_01	CDKN2A	NM_000077.4; NM_001195132.1; NM_001363763.2; NM_058195.3; NM_058197.4; XM_005251343.1; XM_011517675.2; XM_011517676.2; XR_929159.2	2-3 (NM_001195132.1,NM_058195.3,XM_005251343.1,NM_000077.4,NM_001363763.2,NM_058197.4,XM_011517676.2,XM_011517675.2); 2-4 (XR_929159.2)	1696
CDKN2A	CDKN2A_02	CDKN2A	NM_001195132.1; XM_011517676.2; XR_929159.2	3 (NM_001195132.1,XM_011517676.2); 4 (XR_929159.2)	1697
CDKN2B	CDKN2B_01	CDKN2B	NM_004936.4; NM_078487.2	2 (NM_078487.2,NM_004936.4)	1698
CDKN2B	CDKN2B_02	CDKN2B	NM_004936.4; NM_078487.2	2 (NM_078487.2,NM_004936.4)	1699
CDKN2B	CDKN2B_03	CDKN2B	NM_004936.4; NM_078487.2	2 (NM_078487.2,NM_004936.4)	1700
CDKN2B	CDKN2B_04	CDKN2B	NM_004936.4; NM_078487.2	2 (NM_078487.2,NM_004936.4)	1701
CDKN2B	CDKN2B_05	CDKN2B	NM_004936.4; NM_078487.2	2 (NM_078487.2,NM_004936.4)	1702
CDKN2C	CDKN2C_01	CDKN2C	NM_001262.2; NM_078626.3	2 (NM_078626.3); 3 (NM_001262.2)	1703
CDKN2C	CDKN2C_02	CDKN2C	NM_001262.2; NM_078626.3	2 (NM_078626.3); 3 (NM_001262.2)	1704
CDKN2C	CDKN2C_03	CDKN2C	NM_001262.2; NM_078626.3	1-2 (NM_078626.3); 2-3 (NM_001262.2)	1705
CDKN2C	CDKN2C_04	CDKN2C	NM_001262.2; NM_078626.3	2 (NM_078626.3); 3 (NM_001262.2)	1706
CDKN2C	CDKN2C_05	CDKN2C	NM_001262.2; NM_078626.3	1-2 (NM_078626.3); 2-3 (NM_001262.2)	1707
CDKN2D	CDKN2D_01	CDKN2D	NM_001800.4; NM_079421.3	2 (NM_001800.4); 3 (NM_079421.3)	1708
CDKN2D	CDKN2D_02	CDKN2D	NM_001800.4; NM_079421.3	2 (NM_001800.4); 3 (NM_079421.3)	1709
CDKN2D	CDKN2D_03	CDKN2D	NM_001800.4; NM_079421.3	2 (NM_001800.4); 3 (NM_079421.3)	1710
CDKN2D	CDKN2D_04	CDKN2D	NM_001800.4; NM_079421.3	2 (NM_001800.4); 3 (NM_079421.3)	1711
CDKN2D	CDKN2D_05	CDKN2D	NM_001800.4; NM_079421.3	1-2 (NM_001800.4); 2-3 (NM_079421.3)	1712
CEACAM1	CEACAM1_01	CEACAM1	NM_001024912.3; NM_001184813.2; NM_001184815.2; NM_001184816.2; NM_001205344.2; NM_001712.5; XM_011527206.2	1 (NM_001024912.3,XM_011527206.2,NM_001712.5,NM_001184816.2,NM_001184815.2,NM_001205344.2,NM_001184813.2)	1713
CEACAM1	CEACAM1_02	CEACAM1	NM_001024912.3; NM_001184813.2; NM_001184815.2; NM_001184816.2; NM_001205344.2; NM_001712.5	7 (NM_001184816.2); 8 (NM_001024912.3,NM_001205344.2,NM_001184813.2); 9 (NM_001712.5,NM_001184815.2)	1714
CEACAM1	CEACAM1_03	CEACAM1	NM_001024912.3; NM_001184813.2; NM_001184815.2; NM_001184816.2; NM_001205344.2; NM_001712.5	7 (NM_001184816.2); 8 (NM_001024912.3,NM_001205344.2,NM_001184813.2); 9 (NM_001712.5,NM_001184815.2)	1715
CEACAM1	CEACAM1_04	CEACAM1	NM_001024912.3; NM_001205344.2; NM_001712.5; XM_011527206.2	5 (NM_001024912.3,XM_011527206.2,NM_001712.5,NM_001205344.2)	1716
CEACAM1	CEACAM1_05	CEACAM1	NM_001024912.3; NM_001184813.2; NM_001184815.2; NM_001184816.2; NM_001205344.2; NM_001712.5	7 (NM_001184816.2); 8 (NM_001024912.3,NM_001205344.2,NM_001184813.2); 9 (NM_001712.5,NM_001184815.2)	1717
CEACAM3	CEACAM3_01	CEACAM3	NM_001277163.3; NM_001815.5; NR_102333.3	3-4 (NM_001277163.3,NM_001815.5); 4-5 (NR_102333.3)	1718
CEACAM6	CEACAM6_01	CEACAM6	NM_002483.7; XM_011526990.2	2 (XM_011526990.2,NM_002483.7)	1719
CEACAM6	CEACAM6_02	CEACAM6	NM_002483.7; XM_011526990.2	3 (XM_011526990.2,NM_002483.7)	1720
CEACAM6	CEACAM6_03	CEACAM6	NM_002483.7; XM_011526990.2	4 (XM_011526990.2,NM_002483.7)	1721
CEACAM6	CEACAM6_04	CEACAM6	NM_002483.7; XM_011526990.2	4-5 (XM_011526990.2,NM_002483.7)	1722
CEACAM6	CEACAM6_05	CEACAM6	NM_002483.7; XM_011526990.2	5 (XM_011526990.2); 6 (NM_002483.7)	1723
CEACAM8	CEACAM8_01	CEACAM8	NM_001816.4; XM_011526340.2; XM_011526341.1; XM_011526342.1; XM_017026194.1; XM_017026195.1; XM_017026196.1; XM_017026198.1	2 (NM_001816.4,XM_011526341.1,XM_011526340.2,XM_011526342.1,XM_017026195.1,XM_017026196.1,XM_017026198.1,XM_017026194.1)	1724
CEACAM8	CEACAM8_02	CEACAM8	NM_001816.4; XM_011526340.2; XM_011526341.1; XM_011526342.1; XM_017026194.1; XM_017026195.1; XM_017026196.1; XM_017026198.1	2 (NM_001816.4,XM_011526341.1,XM_011526340.2,XM_011526342.1,XM_017026195.1,XM_017026196.1,XM_017026198.1,XM_017026194.1)	1725
CEACAM8	CEACAM8_03	CEACAM8	NM_001816.4; XM_011526340.2; XM_017026194.1; XM_017026195.1; XM_017026196.1; XM_017026197.2	3 (XM_017026197.2); 4 (NM_001816.4,XM_011526340.2,XM_017026195.1,XM_017026196.1,XM_017026194.1)	1726
CEACAM8	CEACAM8_04	CEACAM8	NM_001816.4	6 (NM_001816.4)	1727
CEACAM8	CEACAM8_05	CEACAM8	NM_001816.4; XM_011526340.2; XM_011526341.1; XM_011526342.1; XM_017026194.1; XM_017026195.1; XM_017026196.1; XM_017026197.2; XM_017026198.1	3 (XM_017026197.2); 3-4 (XM_011526341.1,XM_011526342.1,XM_017026198.1); 4 (NM_001816.4,XM_011526340.2,XM_017026195.1,XM_017026196.1,XM_017026194.1)	1728
CEBPA	CEBPA_01	CEBPA	NM_001285829.1; NM_001287424.2; NM_001287435.1; NM_004364.5	1 (NM_004364.5,NM_001287424.2,NM_001285829.1,NM_001287435.1)	1729
CEBPA	CEBPA_02	CEBPA	NM_001285829.1; NM_001287424.2; NM_001287435.1; NM_004364.5	1 (NM_004364.5,NM_001287424.2,NM_001285829.1,NM_001287435.1)	1730
CEBPA	CEBPA_03	CEBPA	NM_001285829.1; NM_001287424.2; NM_001287435.1; NM_004364.5	1 (NM_004364.5,NM_001287424.2,NM_001285829.1,NM_001287435.1)	1731
CEBPA	CEBPA_04	CEBPA	NM_001285829.1; NM_001287424.2; NM_001287435.1; NM_004364.5	1 (NM_004364.5,NM_001287424.2,NM_001285829.1,NM_001287435.1)	1732
CEBPA	CEBPA_05	CEBPA	NM_001285829.1; NM_001287424.2; NM_001287435.1; NM_004364.5	1 (NM_004364.5,NM_001287424.2,NM_001285829.1,NM_001287435.1)	1733
CEBPB	CEBPB_01	CEBPB	NM_001285878.1; NM_001285879.1; NM_005194.4	1 (NM_001285879.1,NM_005194.4,NM_001285878.1)	1734
CEBPB	CEBPB_02	CEBPB	NM_001285878.1; NM_001285879.1	1 (NM_001285879.1,NM_001285878.1)	1735
CEBPB	CEBPB_03	CEBPB	NM_001285878.1; NM_001285879.1; NM_005194.4	1 (NM_001285879.1,NM_005194.4,NM_001285878.1)	1736
CEBPB	CEBPB_04	CEBPB	NM_001285878.1; NM_001285879.1; NM_005194.4	1 (NM_001285879.1,NM_005194.4,NM_001285878.1)	1737
CEBPB	CEBPB_05	CEBPB	NM_001285878.1; NM_001285879.1; NM_005194.4	1 (NM_001285879.1,NM_005194.4,NM_001285878.1)	1738
CEBPE	CEBPE_01	CEBPE	NM_001805.3	1 (NM_001805.3)	1739
CEBPE	CEBPE_02	CEBPE	NM_001805.4	1 (NM_001805.4)	1740
CEBPE	CEBPE_03	CEBPE	NM_001805.4	2 (NM_001805.4)	1741
CEBPE	CEBPE_04	CEBPE	NM_001805.3	1 (NM_001805.3)	1742
CEBPE	CEBPE_05	CEBPE	NM_001805.4	1 (NM_001805.4)	1743
CENPF	CENPF_01	CENPF	NM_016343.4; XM_011509082.3; XM_017000086.2	13 (NM_016343.4,XM_011509082.3,XM_017000086.2)	1744
CENPF	CENPF_02	CENPF	NM_016343.4; XM_011509082.3; XM_017000086.2	6 (NM_016343.4,XM_011509082.3,XM_017000086.2)	1745
CENPF	CENPF_03	CENPF	NM_016343.4; XM_011509082.3; XM_017000086.2	13 (NM_016343.4,XM_011509082.3,XM_017000086.2)	1746
CENPF	CENPF_04	CENPF	NM_016343.4; XM_011509082.3; XM_017000086.2	13 (NM_016343.4,XM_011509082.3,XM_017000086.2)	1747
CENPF	CENPF_05	CENPF	NM_016343.4; XM_011509082.3; XM_017000086.2	12 (NM_016343.4,XM_011509082.3,XM_017000086.2)	1748
CEP55	CEP55_01	CEP55	NM_001127182.2; NM_018131.5; XM_011539918.1; XM_011539919.1; XM_011539920.2; XM_017016372.1; XM_017016373.1	4-5 (XM_011539919.1,XM_011539918.1,NM_018131.5,XM_017016373.1,XM_011539920.2,NM_001127182.2,XM_017016372.1)	1749
CEP55	CEP55_02	CEP55	NM_001127182.2; NM_018131.5; XM_011539918.1; XM_011539919.1; XM_011539920.2; XM_017016372.1; XM_017016373.1	9 (XM_011539919.1,XM_011539918.1,NM_018131.5,XM_017016373.1,XM_011539920.2,NM_001127182.2,XM_017016372.1)	1750
CEP55	CEP55_03	CEP55	NM_001127182.2; NM_018131.5; XM_011539918.1; XM_011539919.1; XM_011539920.2; XM_017016372.1; XM_017016373.1	7-8 (XM_011539919.1,XM_011539918.1,NM_018131.5,XM_017016373.1,XM_011539920.2,NM_001127182.2,XM_017016372.1)	1751
CEP55	CEP55_04	CEP55	NM_001127182.2; NM_018131.5; XM_011539918.1; XM_011539919.1; XM_011539920.2; XM_017016372.1; XM_017016373.1	9 (XM_011539919.1,XM_011539918.1,NM_018131.5,XM_017016373.1,XM_011539920.2,NM_001127182.2,XM_017016372.1)	1752
CEP55	CEP55_05	CEP55	NM_001127182.2; NM_018131.5; XM_011539918.1; XM_011539919.1; XM_011539920.2; XM_017016372.1; XM_017016373.1	9 (XM_011539919.1,XM_011539918.1,NM_018131.5,XM_017016373.1,XM_011539920.2,NM_001127182.2,XM_017016372.1)	1753
CES3	CES3_01	CES3	NM_001185176.1; NM_001185177.2; NM_024922.6	13 (NM_001185177.2,NM_024922.6); 6 (NM_001185176.1)	1754
CES3	CES3_02	CES3	NM_001185176.1; NM_001185177.2; NM_024922.6	10 (NM_001185177.2,NM_024922.6); 3 (NM_001185176.1)	1755
CES3	CES3_03	CES3	NM_001185176.1; NM_001185177.2; NM_024922.6	13 (NM_001185177.2,NM_024922.6); 6 (NM_001185176.1)	1756
CES3	CES3_04	CES3	NM_001185176.1; NM_001185177.2; NM_024922.6	10 (NM_001185177.2,NM_024922.6); 3 (NM_001185176.1)	1757
CES3	CES3_05	CES3	NM_001185177.2; NM_024922.6	2 (NM_001185177.2,NM_024922.6)	1758
CFB	CFB_01	CFB	NM_001710.6	13 (NM_001710.6)	1759
CFB	CFB_02	CFB	NM_001710.6	7 (NM_001710.6)	1760
CFB	CFB_03	CFB	NM_001710.6	11 (NM_001710.6)	1761
CFB	CFB_04	CFB	NM_001710.6	14-15 (NM_001710.6)	1762
CFB	CFB_05	CFB	NM_001710.6	6 (NM_001710.6)	1763
CFD	CFD_01	CFD	NM_001317335.2; NM_001928.4	5 (NM_001317335.2,NM_001928.4)	1764
CFD	CFD_02	CFD	NM_001317335.2; NM_001928.4	5 (NM_001317335.2,NM_001928.4)	1765
CFI	CFI_01	CFI	NM_000204.5; NM_001318057.2; NM_001331035.2; NM_001375278.1; NM_001375279.1; NM_001375280.1; NM_001375281.1; NM_001375282.1; NM_001375283.1; NR_164671.1; NR_164672.1; NR_164673.1; XM_006714210.4; XM_011531920.2; XM_017008166.2	3 (NM_000204.5,NM_001375279.1,NM_001375280.1,NR_164673.1,NR_164672.1,NM_001375282.1,NR_164671.1,NM_001375283.1,NM_001375278.1,NM_001375281.1,XM_017008166.2,NM_001318057.2,XM_006714210.4,NM_001331035.2,XM_011531920.2)	1766
CFI	CFI_02	CFI	NM_000204.5; NM_001318057.2; NM_001331035.2; NM_001375278.1; NM_001375279.1; NM_001375280.1; NM_001375281.1; NM_001375282.1; NM_001375283.1; NR_164671.1; NR_164672.1; NR_164673.1; XM_006714210.4; XM_011531920.2; XM_017008166.2	2 (NM_000204.5,NM_001375279.1,NM_001375280.1,NR_164673.1,NR_164672.1,NM_001375282.1,NR_164671.1,NM_001375283.1,NM_001375278.1,NM_001375281.1,XM_017008166.2,NM_001318057.2,XM_006714210.4,NM_001331035.2,XM_011531920.2)	1767
CFI	CFI_03	CFI	NM_000204.5; NM_001318057.2; NM_001331035.2; NM_001375278.1; NM_001375279.1; NM_001375280.1; NM_001375281.1; NM_001375282.1; NM_001375283.1; NM_001375284.1; NR_164671.1; NR_164672.1; NR_164673.1; XM_006714210.4; XM_011531920.2; XM_017008166.2	2 (NM_001375284.1); 4 (NM_000204.5,NM_001375279.1,NM_001375280.1,NR_164673.1,NR_164672.1,NM_001375282.1,NR_164671.1,NM_001375283.1,NM_001375278.1,NM_001375281.1,XM_017008166.2,NM_001318057.2,XM_006714210.4,NM_001331035.2,XM_011531920.2)	1768
CFI	CFI_04	CFI	NM_000204.5; NM_001318057.2; NM_001331035.2; NM_001375278.1; NM_001375279.1; NM_001375280.1; NM_001375281.1; NM_001375282.1; NM_001375283.1; NR_164671.1; NR_164672.1; NR_164673.1; XM_006714210.4; XM_011531920.2; XM_017008166.2	3 (NM_000204.5,NM_001375279.1,NM_001375280.1,NR_164673.1,NR_164672.1,NM_001375282.1,NR_164671.1,NM_001375283.1,NM_001375278.1,NM_001375281.1,XM_017008166.2,NM_001318057.2,XM_006714210.4,NM_001331035.2,XM_011531920.2)	1769
CFI	CFI_05	CFI	NM_000204.5; NM_001318057.2; NM_001331035.2; NM_001375278.1; NM_001375279.1; NM_001375280.1; NM_001375281.1; NM_001375282.1; NM_001375283.1; NR_164671.1; NR_164672.1; NR_164673.1; XM_006714210.4; XM_011531920.2; XM_017008166.2	3 (NM_000204.5,NM_001375279.1,NM_001375280.1,NR_164673.1,NR_164672.1,NM_001375282.1,NR_164671.1,NM_001375283.1,NM_001375278.1,NM_001375281.1,XM_017008166.2,NM_001318057.2,XM_006714210.4,NM_001331035.2,XM_011531920.2)	1770
CFP	CFP_01	CFP	NM_001145252.3; NM_002621.2	2 (NM_001145252.3); 3 (NM_002621.2)	1771
CFP	CFP_02	CFP	NM_001145252.3; NM_002621.2; XM_017029575.1	10 (NM_002621.2); 8 (XM_017029575.1); 9 (NM_001145252.3)	1772
CFP	CFP_03	CFP	NM_002621.2	1 (NM_002621.2)	1773
CFP	CFP_04	CFP	NM_001145252.3; NM_002621.2	2 (NM_001145252.3); 3 (NM_002621.2)	1774
CFP	CFP_05	CFP	NM_001145252.3; NM_002621.2	1 (NM_001145252.3); 2 (NM_002621.2)	1775
CGAS	CGAS_01	CGAS	NM_138441.3	3 (NM_138441.3)	1776
CGAS	CGAS_02	CGAS	NM_138441.3	1 (NM_138441.3)	1777
CGAS	CGAS_03	CGAS	NM_138441.3	3-4 (NM_138441.3)	1778
CGAS	CGAS_04	CGAS	NM_138441.3	1-2 (NM_138441.3)	1779
CGAS	CGAS_05	CGAS	NM_138441.3	5 (NM_138441.3)	1780
CHAD	CHAD_01	CHAD	NM_001267.3; XM_011524214.2	2 (XM_011524214.2,NM_001267.3)	1781
CHAD	CHAD_02	CHAD	NM_001267.3; XM_011524214.2	1 (XM_011524214.2,NM_001267.3)	1782
CHAD	CHAD_03	CHAD	NM_001267.3; XM_011524214.2	2 (XM_011524214.2,NM_001267.3)	1783
CHAD	CHAD_04	CHAD	NM_001267.3; XM_011524214.2	1 (XM_011524214.2,NM_001267.3)	1784
CHAD	CHAD_05	CHAD	NM_001267.3; XM_011524214.2	4 (XM_011524214.2,NM_001267.3)	1785
CHEK1	CHEK1_01	CHEK1	NM_001114121.2; NM_001114122.2; NM_001244846.1; NM_001274.5; NM_001330427.1; NM_001330428.1; NR_045204.1; NR_045205.1; XM_011542560.2; XM_017017146.2; XM_024448337.1	10 (NM_001330427.1,NR_045204.1,XM_011542560.2,NM_001330428.1); 11 (NM_001274.5,XM_017017146.2,NM_001114122.2,XM_024448337.1,NM_001244846.1,NR_045205.1,NM_001114121.2)	1786
CHEK1	CHEK1_02	CHEK1	NM_001114121.2; NM_001114122.2; NM_001244846.1; NM_001274.5; NM_001330427.1; NM_001330428.1; NR_045204.1; NR_045205.1; XM_011542560.2; XM_017017146.2; XM_024448337.1	5 (NM_001330427.1,NR_045204.1,XM_011542560.2,NM_001330428.1); 6 (NM_001274.5,XM_017017146.2,NM_001114122.2,XM_024448337.1,NM_001244846.1,NR_045205.1,NM_001114121.2)	1787
CHEK1	CHEK1_03	CHEK1	NM_001114121.2; NM_001114122.2; NM_001244846.1; NM_001274.5; NM_001330427.1; NM_001330428.1; NR_045204.1; NR_045205.1; XM_011542560.2; XM_017017146.2; XM_024448337.1	8 (NM_001330427.1,NR_045204.1,XM_011542560.2,NM_001330428.1); 9 (NM_001274.5,XM_017017146.2,NM_001114122.2,XM_024448337.1,NM_001244846.1,NR_045205.1,NM_001114121.2)	1788
CHEK1	CHEK1_04	CHEK1	NM_001114121.2; NM_001114122.2; NM_001244846.1; NM_001274.5; NM_001330427.1; NM_001330428.1; NR_045204.1; NR_045205.1; XM_011542560.2; XM_017017146.2; XM_024448337.1	10 (NM_001330427.1,NR_045204.1,XM_011542560.2,NM_001330428.1); 11 (NM_001274.5,XM_017017146.2,NM_001114122.2,XM_024448337.1,NM_001244846.1,NR_045205.1,NM_001114121.2)	1789
CHEK1	CHEK1_05	CHEK1	NM_001114121.2; NM_001114122.2; NM_001244846.1; NM_001274.5; NM_001330427.1; NM_001330428.1; NR_045204.1; NR_045205.1; XM_011542560.2; XM_017017146.2; XM_024448337.1	11-12 (NM_001330427.1,NR_045204.1,NM_001244846.1,XM_011542560.2,NM_001330428.1); 12-13 (NM_001274.5,XM_017017146.2,NM_001114122.2,XM_024448337.1,NR_045205.1,NM_001114121.2)	1790
CHEK2	CHEK2_01	CHEK2; LOC101929031; LOC102723841; LOC102723890	NM_001005735.2; NM_001257387.2; NM_001349956.2; NM_007194.4; NM_145862.2; XM_006724114.3; XM_006724116.2; XM_011529839.2; XM_011529840.3; XM_011529841.1; XM_011529842.2; XM_011529845.2; XM_017028560.1; XM_017028561.2; XM_024452148.1; XM_024452149.1; XR_243387.3; XR_430586.3; XR_430589.3; XR_937805.2	11 (XM_011529845.2,XM_024452149.1,NM_145862.2,XM_011529842.2,NM_001349956.2); 12 (XR_937805.2,NM_007194.4,XM_011529841.1,XM_011529840.3,XM_024452148.1); 13 (XM_017028560.1,NM_001005735.2,NM_001257387.2,XM_011529839.2); 8 (XM_006724116.2,XM_006724114.3); 9 (XM_017028561.2)	1791
CHEK2	CHEK2_02	CHEK2	NM_001005735.2; NM_001257387.2; NM_001349956.2; NM_007194.4; XM_006724114.3; XM_006724116.2; XM_011529839.2; XM_011529841.1; XM_011529842.2; XM_011529845.2; XM_017028560.1; XM_017028561.2; XM_024452148.1; XR_937805.2	10 (XR_937805.2,NM_007194.4,XM_011529841.1,XM_024452148.1); 11 (XM_017028560.1,NM_001005735.2,NM_001257387.2,XM_011529839.2); 6 (XM_006724116.2,XM_006724114.3); 7 (XM_017028561.2); 9 (XM_011529845.2,XM_011529842.2,NM_001349956.2)	1792
CHEK2	CHEK2_03	CHEK2	NM_001005735.2; NM_001257387.2; NM_001349956.2; NM_007194.4; NM_145862.2; XM_011529839.2; XM_011529840.3; XM_011529841.1; XM_011529842.2; XM_011529844.2; XM_017028560.1; XM_024452148.1; XM_024452149.1; XR_937805.2; XR_937806.2; XR_937807.2	2-3 (XR_937805.2,XM_017028560.1,NM_007194.4,XM_011529841.1,XM_011529840.3,NM_001005735.2,XM_024452148.1,NM_001257387.2,XM_024452149.1,NM_145862.2,XM_011529839.2,XM_011529842.2,NM_001349956.2,XR_937806.2,XR_937807.2,XM_011529844.2)	1793
CHEK2	CHEK2_04	CHEK2	NM_001005735.2; NM_001257387.2; NM_001349956.2; NM_007194.4; NM_145862.2; XM_011529839.2; XM_011529840.3; XM_011529841.1; XM_011529842.2; XM_011529844.2; XM_017028560.1; XM_024452148.1; XM_024452149.1; XR_937805.2; XR_937806.2; XR_937807.2	2 (XR_937805.2,XM_017028560.1,NM_007194.4,XM_011529841.1,XM_011529840.3,NM_001005735.2,XM_024452148.1,NM_001257387.2,XM_024452149.1,NM_145862.2,XM_011529839.2,XM_011529842.2,NM_001349956.2,XR_937806.2,XR_937807.2,XM_011529844.2)	1794
CHEK2	CHEK2_05	CHEK2	NM_001005735.2; NM_001257387.2; NM_001349956.2; NM_007194.4; NM_145862.2; XM_006724114.3; XM_006724116.2; XM_011529839.2; XM_011529840.3; XM_011529841.1; XM_011529842.2; XM_011529844.2; XM_011529845.2; XM_017028560.1; XM_017028561.2; XM_024452148.1; XM_024452149.1; XR_937805.2; XR_937806.2; XR_937807.2	1-2 (XM_006724116.2,XM_006724114.3); 2-3 (XM_017028561.2); 4-5 (XM_011529845.2,XM_011529842.2,NM_001349956.2); 5-6 (NM_007194.4,XM_011529841.1,XM_024452148.1,XM_024452149.1,NM_145862.2); 6-7 (XR_937805.2,XM_017028560.1,XM_011529840.3,NM_001005735.2,NM_001257387.2,XM_011529839.2,XR_937806.2,XR_937807.2,XM_011529844.2)	1795
CHIT1	CHIT1_01	CHIT1	NM_001256125.2; NM_003465.3; NR_045784.2; NR_045785.2	3 (NM_003465.3,NR_045785.2,NR_045784.2,NM_001256125.2)	1796
CHIT1	CHIT1_02	CHIT1	NM_001256125.2; NM_003465.3; NR_045784.2; NR_045785.2	3 (NM_003465.3,NR_045785.2,NR_045784.2,NM_001256125.2)	1797
CHIT1	CHIT1_03	CHIT1	NM_001256125.2; NM_003465.3; NR_045784.2; NR_045785.2	4 (NM_001256125.2); 5 (NM_003465.3,NR_045785.2,NR_045784.2)	1798
CHIT1	CHIT1_04	CHIT1	NM_001256125.2; NM_003465.3; NR_045784.2; NR_045785.2	4 (NM_001256125.2); 5 (NM_003465.3,NR_045785.2,NR_045784.2)	1799
CHIT1	CHIT1_05	CHIT1	NM_001256125.2; NM_003465.3; NR_045784.2; NR_045785.2	5 (NM_001256125.2); 6 (NM_003465.3,NR_045785.2,NR_045784.2)	1800
CHUK	CHUK_01	CHUK	NM_001278.5; NM_001320928.1; XM_017015611.1; XM_017015612.1; XM_017015613.1; XR_001747010.1; XR_001747011.1	10 (NM_001278.5,XM_017015612.1,XR_001747010.1,XM_017015611.1,XR_001747011.1,NM_001320928.1)	1801
CHUK	CHUK_02	CHUK	NM_001278.5; NM_001320928.1; XM_017015611.1; XM_017015612.1; XR_001747010.1; XR_001747011.1	2 (NM_001278.5,XM_017015612.1,XR_001747010.1,XM_017015611.1,XR_001747011.1,NM_001320928.1)	1802
CHUK	CHUK_03	CHUK	NM_001278.5; NM_001320928.1; XM_017015611.1; XM_017015612.1; XR_001747010.1; XR_001747011.1	6 (NM_001278.5,XM_017015612.1,XR_001747010.1,XM_017015611.1,XR_001747011.1,NM_001320928.1)	1803
CHUK	CHUK_04	CHUK	NM_001278.5; NM_001320928.1; XM_017015611.1; XM_017015612.1; XM_017015613.1; XR_001747010.1; XR_001747011.1	12 (XR_001747011.1); 13 (NM_001278.5,XM_017015612.1,XR_001747010.1,XM_017015611.1,NM_001320928.1); 3 (XM_017015613.1)	1804
CHUK	CHUK_05	CHUK	NM_001278.5; NM_001320928.1; XM_017015611.1; XM_017015612.1; XR_001747010.1; XR_001747011.1	1-2 (NM_001278.5,XM_017015612.1,XR_001747010.1,XM_017015611.1,XR_001747011.1,NM_001320928.1)	1805
CIC	CIC_01	CIC	NM_001304815.1; NM_015125.4; XM_005258673.2; XM_005258674.2; XM_005258675.2; XM_011526660.2; XM_011526661.2; XM_011526662.2; XM_011526663.2; XM_011526664.2; XM_011526665.2; XM_011526666.2; XM_011526667.2; XM_024451432.1; XM_024451433.1; XR_002958286.1; XR_002958287.1; XR_002958288.1; XR_002958289.1; XR_002958290.1; XR_935778.2; XR_935779.2	4 (NM_015125.4,XM_005258675.2,XM_005258674.2,XM_005258673.2); 5 (XR_935779.2,NM_001304815.1,XM_011526665.2,XM_024451432.1,XM_011526667.2,XR_002958286.1,XM_011526661.2,XR_002958289.1,XM_011526663.2,XR_002958290.1,XM_011526666.2,XM_011526662.2,XR_002958288.1,XR_002958287.1,XR_935778.2,XM_011526664.2,XM_011526660.2,XM_024451433.1)	1806
CIC	CIC_02	CIC	NM_001304815.1; NM_015125.4; XM_005258673.2; XM_005258674.2; XM_005258675.2; XM_011526660.2; XM_011526661.2; XM_011526662.2; XM_011526663.2; XM_011526664.2; XM_011526665.2; XM_011526666.2; XM_024451432.1; XM_024451433.1; XR_002958286.1; XR_002958287.1; XR_002958288.1; XR_002958289.1; XR_002958290.1	18-19 (XR_002958286.1,XR_002958289.1,XR_002958290.1,NM_015125.4,XM_005258675.2,XR_002958288.1,XR_002958287.1,XM_005258674.2,XM_005258673.2); 19-20 (NM_001304815.1,XM_011526665.2,XM_024451432.1,XM_011526661.2,XM_011526663.2,XM_011526666.2,XM_011526662.2,XM_011526664.2,XM_011526660.2,XM_024451433.1)	1807
CIC	CIC_03	CIC	NM_001304815.1; NM_015125.4; XM_005258673.2; XM_005258674.2; XM_005258675.2; XM_011526660.2; XM_011526661.2; XM_011526662.2; XM_011526663.2; XM_011526664.2; XM_011526665.2; XM_011526666.2; XM_011526667.2; XM_024451432.1; XM_024451433.1; XR_002958286.1; XR_002958287.1; XR_002958288.1; XR_002958289.1; XR_002958290.1; XR_935778.2; XR_935779.2	8 (NM_015125.4,XM_005258675.2,XM_005258674.2,XM_005258673.2); 9 (XR_935779.2,NM_001304815.1,XM_011526665.2,XM_024451432.1,XM_011526667.2,XR_002958286.1,XM_011526661.2,XR_002958289.1,XM_011526663.2,XR_002958290.1,XM_011526666.2,XM_011526662.2,XR_002958288.1,XR_002958287.1,XR_935778.2,XM_011526664.2,XM_011526660.2,XM_024451433.1)	1808
CIC	CIC_04	CIC	NM_001304815.1; NM_015125.4; XM_005258673.2; XM_005258674.2; XM_005258675.2; XM_011526660.2; XM_011526661.2; XM_011526662.2; XM_011526663.2; XM_011526664.2; XM_011526665.2; XM_011526666.2; XM_011526667.2; XM_024451432.1; XM_024451433.1; XR_002958286.1; XR_002958287.1; XR_002958288.1; XR_002958289.1; XR_002958290.1; XR_935778.2; XR_935779.2	8 (NM_015125.4,XM_005258675.2,XM_005258674.2,XM_005258673.2); 9 (XR_935779.2,NM_001304815.1,XM_011526665.2,XM_024451432.1,XM_011526667.2,XR_002958286.1,XM_011526661.2,XR_002958289.1,XM_011526663.2,XR_002958290.1,XM_011526666.2,XM_011526662.2,XR_002958288.1,XR_002958287.1,XR_935778.2,XM_011526664.2,XM_011526660.2,XM_024451433.1)	1809
CIC	CIC_05	CIC	NM_001304815.1; NM_015125.4; XM_005258673.2; XM_005258674.2; XM_005258675.2; XM_011526660.2; XM_011526661.2; XM_011526662.2; XM_011526663.2; XM_011526664.2; XM_011526665.2; XM_011526666.2; XM_011526667.2; XM_024451432.1; XM_024451433.1; XR_002958286.1; XR_002958287.1; XR_002958288.1; XR_002958289.1; XR_002958290.1; XR_935778.2; XR_935779.2	4 (NM_015125.4,XM_005258675.2,XM_005258674.2,XM_005258673.2); 5 (XR_935779.2,NM_001304815.1,XM_011526665.2,XM_024451432.1,XM_011526667.2,XR_002958286.1,XM_011526661.2,XR_002958289.1,XM_011526663.2,XR_002958290.1,XM_011526666.2,XM_011526662.2,XR_002958288.1,XR_002958287.1,XR_935778.2,XM_011526664.2,XM_011526660.2,XM_024451433.1)	1810
CKLF	CKLF_01	CKLF; CKLF-CMTM1	NM_001040138.2; NM_001202509.2; NM_001204098.2; NM_001204099.2; NM_016326.3; NM_016951.4; NM_181640.2; NM_181641.2	1 (NM_016951.4,NM_016326.3,NM_181641.2,NM_001040138.2,NM_181640.2)	1811
CKLF	CKLF_02	CKLF; CKLF-CMTM1	NM_001040138.2; NM_001202509.2; NM_001204098.2; NM_001204099.2; NM_016326.3; NM_016951.4; NM_181640.2; NM_181641.2	1 (NM_016951.4,NM_016326.3,NM_181641.2,NM_001040138.2,NM_181640.2)	1812
CKLF	CKLF_03	CKLF; CKLF-CMTM1	NM_001040138.2; NM_001204099.2; NM_016951.4; NM_181641.2	2 (NM_016951.4,NM_181641.2,NM_001040138.2)	1813
CKLF	CKLF_04	CKLF; CKLF-CMTM1	NM_001040138.2; NM_001204098.2; NM_016951.4; NM_181640.2	2 (NM_181640.2); 3 (NM_016951.4,NM_001040138.2)	1814
CKLF	CKLF_05	CKLF	NM_016326.3; NM_016951.4; NM_181640.2; NM_181641.2	2 (NM_016326.3); 3 (NM_181641.2,NM_181640.2); 4 (NM_016951.4)	1815
CLCF1	CLCF1_01	CLCF1	NM_001166212.2; NM_013246.3	3 (NM_001166212.2,NM_013246.3)	1816
CLCF1	CLCF1_02	CLCF1	NM_001166212.2; NM_013246.3	3 (NM_001166212.2,NM_013246.3)	1817
CLCF1	CLCF1_03	CLCF1	NM_001166212.2; NM_013246.3	3 (NM_001166212.2,NM_013246.3)	1818
CLCF1	CLCF1_04	CLCF1	NM_001166212.2; NM_013246.3	3 (NM_001166212.2,NM_013246.3)	1819
CLCF1	CLCF1_05	CLCF1	NM_001166212.2; NM_013246.3	3 (NM_001166212.2,NM_013246.3)	1820
CLEC14A	CLEC14A_01	CLEC14A	NM_175060.3	1 (NM_175060.3)	1821
CLEC14A	CLEC14A_02	CLEC14A	NM_175060.3	1 (NM_175060.3)	1822
CLEC14A	CLEC14A_03	CLEC14A	NM_175060.3	1 (NM_175060.3)	1823
CLEC14A	CLEC14A_04	CLEC14A	NM_175060.3	1 (NM_175060.3)	1824
CLEC14A	CLEC14A_05	CLEC14A	NM_175060.3	1 (NM_175060.3)	1825
CLEC4A	CLEC4A_01	CLEC4A	NM_016184.3; NM_194447.2; NM_194448.2; NM_194450.2	1 (NM_194448.2,NM_016184.3,NM_194450.2,NM_194447.2)	1826
CLEC4A	CLEC4A_02	CLEC4A	NM_016184.3; NM_194447.2; NM_194448.2; NM_194450.2; XM_011520684.2; XM_017019382.2; XM_024448997.1	3-4 (NM_194448.2); 4-5 (NM_194450.2,NM_194447.2,XM_011520684.2); 5-6 (NM_016184.3); 6-7 (XM_017019382.2,XM_024448997.1)	1827
CLEC4A	CLEC4A_03	CLEC4A	NM_016184.3; NM_194447.2; NM_194448.2; NM_194450.2; XM_011520684.2; XM_017019382.2; XM_024448997.1	2 (NM_194448.2); 3 (NM_194450.2,NM_194447.2,XM_011520684.2); 4 (NM_016184.3); 5 (XM_017019382.2,XM_024448997.1)	1828
CLEC4A	CLEC4A_04	CLEC4A	NM_016184.3; NM_194447.2; NM_194448.2; NM_194450.2; XM_011520684.2; XM_017019382.2; XM_024448997.1	4 (NM_194448.2); 5 (NM_194450.2,NM_194447.2,XM_011520684.2); 6 (NM_016184.3); 7 (XM_017019382.2,XM_024448997.1)	1829
CLEC4A	CLEC4A_05	CLEC4A	NM_016184.3; NM_194447.2; NM_194448.2; NM_194450.2; XM_011520684.2; XM_017019382.2; XM_024448997.1	4 (NM_194448.2); 5 (NM_194450.2,NM_194447.2,XM_011520684.2); 6 (NM_016184.3); 7 (XM_017019382.2,XM_024448997.1)	1830
CLEC4C	CLEC4C_01	CLEC4C	NM_001371390.1; NM_130441.3; NM_203503.2; XM_017018940.2; XM_024448872.1; XM_024448873.1	3 (NM_001371390.1,NM_203503.2); 4 (XM_024448872.1,XM_017018940.2,NM_130441.3,XM_024448873.1)	1831
CLEC4C	CLEC4C_02	CLEC4C	NM_001371390.1; NM_001371391.1; NM_130441.3; NM_203503.2; XM_017018940.2; XM_024448872.1; XM_024448873.1	5-6 (NM_001371390.1,NM_203503.2,NM_001371391.1); 6-7 (XM_024448872.1,XM_017018940.2,NM_130441.3,XM_024448873.1)	1832
CLEC4C	CLEC4C_03	CLEC4C	NM_001371391.1; NM_130441.3; NM_203503.2; XM_017018940.2; XM_024448872.1; XM_024448873.1	1-2 (XM_024448872.1,XM_017018940.2,NM_130441.3,NM_203503.2,NM_001371391.1); 2 (XM_024448873.1)	1833
CLEC4C	CLEC4C_04	CLEC4C	NM_001371390.1; NM_001371391.1; NM_130441.3; NM_203503.2; XM_017018940.2; XM_024448872.1; XM_024448873.1	6 (NM_001371390.1,NM_203503.2,NM_001371391.1); 7 (XM_024448872.1,XM_017018940.2,NM_130441.3,XM_024448873.1)	1834
CLEC4C	CLEC4C_05	CLEC4C	NM_001371391.1; NM_130441.3; NM_203503.2; XM_017018940.2; XM_024448872.1; XM_024448873.1	1-2 (XM_024448872.1,XM_017018940.2,NM_130441.3,XM_024448873.1,NM_203503.2,NM_001371391.1)	1835
CLEC4E	CLEC4E_01	CLEC4E	NM_014358.4; XM_011520614.3; XM_011520615.1	5 (XM_011520614.3,XM_011520615.1); 6 (NM_014358.4)	1836
CLEC4E	CLEC4E_02	CLEC4E	NM_014358.4; XM_011520614.3; XM_011520615.1	2-3 (XM_011520614.3); 3-4 (NM_014358.4,XM_011520615.1)	1837
CLEC4E	CLEC4E_03	CLEC4E	NM_014358.4; XM_011520615.1	1-2 (NM_014358.4,XM_011520615.1)	1838
CLEC4E	CLEC4E_04	CLEC4E	NM_014358.4	6 (NM_014358.4)	1839
CLEC4E	CLEC4E_05	CLEC4E	NM_014358.4; XM_011520614.3; XM_011520615.1	4 (XM_011520614.3,XM_011520615.1); 5 (NM_014358.4)	1840
CLEC5A	CLEC5A_01	CLEC5A	NM_001301167.2; NM_013252.3; XM_011515995.2; XM_017011915.1; XM_017011917.1	5 (XM_011515995.2); 6 (XM_017011915.1,NM_001301167.2,XM_017011917.1); 7 (NM_013252.3)	1841
CLEC5A	CLEC5A_02	CLEC5A	NM_001301167.2; NM_013252.3; XM_011515995.2; XM_017011915.1; XM_017011917.1	5 (XM_011515995.2); 6 (XM_017011915.1,NM_001301167.2,XM_017011917.1); 7 (NM_013252.3)	1842
CLEC5A	CLEC5A_03	CLEC5A	NM_001301167.2; NM_013252.3; XM_011515995.2; XM_017011915.1; XM_017011917.1	5 (XM_011515995.2); 6 (XM_017011915.1,NM_001301167.2,XM_017011917.1); 7 (NM_013252.3)	1843
CLEC5A	CLEC5A_04	CLEC5A	NM_001301167.2; NM_013252.3; XM_011515995.2; XM_017011915.1; XM_017011916.2; XM_017011917.1	3 (XM_011515995.2); 4 (XM_017011915.1,NM_001301167.2,XM_017011917.1); 5 (NM_013252.3,XM_017011916.2)	1844
CLEC5A	CLEC5A_05	CLEC5A	NM_001301167.2; NM_013252.3; XM_011515995.2; XM_017011915.1; XM_017011917.1	5 (XM_011515995.2); 6 (XM_017011915.1,NM_001301167.2,XM_017011917.1); 7 (NM_013252.3)	1845
CLEC6A	CLEC6A_01	CLEC6A	NM_001007033.2; NM_001317999.2	5 (NM_001317999.2); 6 (NM_001007033.2)	1846
CLEC6A	CLEC6A_02	CLEC6A	NM_001007033.2; NM_001317999.2	4-5 (NM_001317999.2); 5-6 (NM_001007033.2)	1847
CLEC6A	CLEC6A_03	CLEC6A	NM_001007033.2; NM_001317999.2	3 (NM_001317999.2); 4 (NM_001007033.2)	1848
CLEC6A	CLEC6A_04	CLEC6A	NM_001007033.2; NM_001317999.2	1 (NM_001007033.2,NM_001317999.2)	1849
CLEC6A	CLEC6A_05	CLEC6A	NM_001007033.2; NM_001317999.2	3 (NM_001317999.2); 4 (NM_001007033.2)	1850
CLEC7A	CLEC7A_01	CLEC7A	NM_022570.5; NM_197947.3; NM_197948.3; NM_197949.3; NM_197954.3; NR_125336.2; XM_006719135.3; XM_017019822.1; XM_017019823.1; XM_024449132.1; XM_024449133.1	2 (XM_006719135.3,NM_197954.3,NR_125336.2,NM_022570.5,NM_197947.3,NM_197949.3,NM_197948.3,XM_017019822.1,XM_024449133.1,XM_024449132.1,XM_017019823.1)	1851
CLEC7A	CLEC7A_02	CLEC7A	NM_022570.5; NM_197947.3; NM_197948.3; NM_197949.3; NM_197950.3; NM_197954.3; NR_125336.2; XM_006719135.3; XM_017019822.1; XM_017019823.1; XM_024449132.1; XM_024449133.1	1 (XM_006719135.3,NM_197954.3,NR_125336.2,NM_022570.5,NM_197947.3,NM_197949.3,NM_197948.3,XM_017019822.1,XM_024449133.1,XM_024449132.1,XM_017019823.1,NM_197950.3)	1852
CLEC7A	CLEC7A_03	CLEC7A	NM_022570.5; NM_197947.3; NM_197948.3; NM_197949.3; NM_197950.3; NM_197954.3; NR_125336.2; XM_006719135.3; XM_017019822.1; XM_017019823.1; XM_024449132.1; XM_024449133.1	1 (XM_006719135.3,NM_197954.3,NR_125336.2,NM_022570.5,NM_197947.3,NM_197949.3,NM_197948.3,XM_017019822.1,XM_024449133.1,XM_024449132.1,XM_017019823.1,NM_197950.3)	1853
CLEC7A	CLEC7A_04	CLEC7A	NM_022570.5; NM_197947.3; NM_197948.3; NM_197949.3; NM_197950.3; NR_125336.2; XM_017019822.1; XM_017019823.1	4 (NM_197949.3,NM_197950.3); 5 (NM_022570.5,NM_197948.3,XM_017019823.1); 6 (NM_197947.3,XM_017019822.1); 7 (NR_125336.2)	1854
CLEC7A	CLEC7A_05	CLEC7A	NM_022570.5; NM_197947.3; NM_197948.3; NM_197949.3; NM_197950.3; NR_125336.2; XM_006719135.3; XM_017019822.1; XM_017019823.1; XM_024449132.1; XM_024449133.1	2 (NM_197950.3); 3 (NM_022570.5,NM_197949.3,XM_024449133.1,XM_017019823.1); 4 (XM_006719135.3,NR_125336.2,NM_197947.3,NM_197948.3,XM_017019822.1,XM_024449132.1)	1855
CLECL1	CLECL1_01	CLECL1	NM_001253750.1; NM_001267701.1; NM_172004.3; XM_011520574.2; XM_017018885.1	1 (NM_001253750.1,NM_001267701.1,NM_172004.3,XM_011520574.2); 2 (XM_017018885.1)	1856
CLECL1	CLECL1_02	CLECL1	NM_001253750.1; NM_001267701.1	3 (NM_001267701.1); 4 (NM_001253750.1)	1857
CLECL1	CLECL1_03	CLECL1	NM_001253750.1; NM_001267701.1	3 (NM_001267701.1); 4 (NM_001253750.1)	1858
CLECL1	CLECL1_04	CLECL1	NM_001253750.1; NM_001267701.1	3 (NM_001267701.1); 4 (NM_001253750.1)	1859
CLECL1	CLECL1_05	CLECL1	NM_001253750.1; NM_001267701.1	3 (NM_001267701.1); 4 (NM_001253750.1)	1860
CLU	CLU_01	CLU	NM_001831.4; NR_038335.1; NR_045494.1	7 (NR_038335.1,NM_001831.4,NR_045494.1)	1861
CLU	CLU_02	CLU	NM_001831.4; NR_038335.1; NR_045494.1	4 (NR_038335.1,NM_001831.4,NR_045494.1)	1862
CLU	CLU_03	CLU	NM_001831.4; NR_038335.1; NR_045494.1	7 (NR_038335.1,NM_001831.4,NR_045494.1)	1863
CLU	CLU_04	CLU	NM_001831.4; NR_038335.1; NR_045494.1	7 (NR_038335.1,NM_001831.4,NR_045494.1)	1864
CLU	CLU_05	CLU	NM_001831.4; NR_038335.1; NR_045494.1	7 (NR_038335.1,NM_001831.4,NR_045494.1)	1865
CMA1	CMA1_01	CMA1	NM_001308083.2; NM_001836.5	3 (NM_001308083.2); 4 (NM_001836.5)	1866
CMA1	CMA1_02	CMA1	NM_001308083.2; NM_001836.5	2 (NM_001308083.2); 3 (NM_001836.5)	1867
CMA1	CMA1_03	CMA1	NM_001308083.2; NM_001836.5	4 (NM_001308083.2); 5 (NM_001836.5)	1868
CMA1	CMA1_04	CMA1	NM_001308083.2; NM_001836.5	2 (NM_001308083.2); 3 (NM_001836.5)	1869
CMA1	CMA1_05	CMA1	NM_001308083.2; NM_001836.5	4 (NM_001308083.2); 5 (NM_001836.5)	1870
CMKLR1	CMKLR1_01	CMKLR1	NM_001142343.2; NM_001142344.2; NM_001142345.1; NM_004072.3; XM_017018820.2	2 (XM_017018820.2); 3 (NM_001142345.1,NM_004072.3,NM_001142344.2); 4 (NM_001142343.2)	1871
CMKLR1	CMKLR1_02	CMKLR1	NM_001142343.2; NM_001142344.2; NM_001142345.1; NM_004072.3; XM_017018820.2	2 (XM_017018820.2); 3 (NM_001142345.1,NM_004072.3,NM_001142344.2); 4 (NM_001142343.2)	1872
CMKLR1	CMKLR1_03	CMKLR1	NM_001142343.2; NM_001142344.2; NM_001142345.1; NM_004072.3; XM_017018820.2	2 (XM_017018820.2); 3 (NM_001142345.1,NM_004072.3,NM_001142344.2); 4 (NM_001142343.2)	1873
CMKLR1	CMKLR1_04	CMKLR1	NM_001142343.2; NM_001142344.2; NM_001142345.1; NM_004072.3; XM_017018820.2	2 (XM_017018820.2); 3 (NM_001142345.1,NM_004072.3,NM_001142344.2); 4 (NM_001142343.2)	1874
CMKLR1	CMKLR1_05	CMKLR1	NM_001142343.2; NM_001142344.2; NM_001142345.1; NM_004072.3; XM_017018820.2	2 (XM_017018820.2); 3 (NM_001142345.1,NM_004072.3,NM_001142344.2); 4 (NM_001142343.2)	1875
CMTM4	CMTM4_01	CMTM4	NM_178818.3; NM_181521.3; XM_011522882.1; XM_017022954.1; XR_933209.2; XR_933210.2	3-4 (XM_017022954.1,XM_011522882.1,NM_181521.3,XR_933210.2,XR_933209.2,NM_178818.3)	1876
CMTM4	CMTM4_02	CMTM4	NM_178818.3; NM_181521.3; XM_011522882.1	4 (XM_011522882.1,NM_181521.3); 5 (NM_178818.3)	1877
CMTM4	CMTM4_03	CMTM4	NM_178818.3; NM_181521.3; XM_011522882.1	4 (XM_011522882.1,NM_181521.3); 5 (NM_178818.3)	1878
CMTM4	CMTM4_04	CMTM4	NM_178818.3; NM_181521.3; XM_011522882.1	4 (XM_011522882.1,NM_181521.3); 5 (NM_178818.3)	1879
CMTM4	CMTM4_05	CMTM4	NM_178818.3; NM_181521.3; XM_011522882.1; XM_017022954.1; XR_933209.2; XR_933210.2	1-2 (XM_017022954.1,XM_011522882.1,NM_181521.3,XR_933210.2,XR_933209.2,NM_178818.3)	1880
CMTM6	CMTM6_01	CMTM6	NM_017801.3	4 (NM_017801.3)	1881
CMTM6	CMTM6_02	CMTM6	NM_017801.3	4 (NM_017801.3)	1882
CMTM6	CMTM6_03	CMTM6	NM_017801.3	4 (NM_017801.3)	1883
CMTM6	CMTM6_04	CMTM6	NM_017801.3	4 (NM_017801.3)	1884
CMTM6	CMTM6_05	CMTM6	NM_017801.3	4 (NM_017801.3)	1885
CNOT2	CNOT2_01	CNOT2	NM_001199302.1; NM_001199303.1; NM_014515.6; NR_037615.1; XM_006719429.3; XM_006719430.3; XM_006719432.4; XM_006719433.4; XM_011538399.1; XM_011538400.3; XM_017019348.1; XM_017019349.1; XM_017019350.1; XM_017019351.1; XM_017019352.1; XM_017019353.1; XM_017019354.1; XM_024448986.1; XM_024448987.1; XM_024448988.1; XR_001748718.1	3 (XM_006719433.4,NM_001199303.1,XM_024448988.1,XM_006719432.4,XR_001748718.1,NM_014515.6,XM_011538399.1); 4 (XM_017019354.1,NM_001199302.1,XM_024448987.1,NR_037615.1,XM_006719430.3,XM_006719429.3,XM_011538400.3,XM_017019353.1); 5 (XM_017019350.1,XM_017019349.1,XM_024448986.1,XM_017019348.1,XM_017019351.1); 6 (XM_017019352.1)	1886
CNOT2	CNOT2_02	CNOT2	NM_001199302.1; NM_001199303.1; NM_014515.6; NR_037615.1; XM_006719429.3; XM_006719430.3; XM_011538399.1; XM_011538400.3; XM_017019348.1; XM_017019349.1; XM_017019350.1; XM_017019351.1; XM_017019352.1; XM_024448988.1; XR_001748718.1	6 (NM_001199303.1,XM_024448988.1,XR_001748718.1,NM_014515.6,XM_011538399.1); 7 (NM_001199302.1,NR_037615.1,XM_006719430.3,XM_006719429.3,XM_011538400.3); 8 (XM_017019350.1,XM_017019349.1,XM_017019348.1,XM_017019351.1); 9 (XM_017019352.1)	1887
CNOT2	CNOT2_03	CNOT2	NM_001199302.1; NM_001199303.1; NM_014515.6; NR_037615.1; XM_006719429.3; XM_006719430.3; XM_006719432.4; XM_006719433.4; XM_011538399.1; XM_011538400.3; XM_017019348.1; XM_017019349.1; XM_017019350.1; XM_017019351.1; XM_017019352.1; XM_017019353.1; XM_017019354.1; XM_024448986.1; XM_024448987.1; XR_001748718.1	10 (XM_024448986.1,XM_006719432.4); 11 (NM_001199303.1,XR_001748718.1,NM_014515.6,XM_011538399.1); 12 (NM_001199302.1,NR_037615.1,XM_006719430.3,XM_006719429.3,XM_011538400.3); 13 (XM_017019350.1,XM_017019349.1,XM_017019348.1,XM_017019351.1); 14 (XM_017019352.1); 8 (XM_006719433.4); 9 (XM_017019354.1,XM_024448987.1,XM_017019353.1)	1888
CNOT2	CNOT2_04	CNOT2	NM_001199302.1; NM_001199303.1; NM_014515.6; NR_037615.1; XM_006719429.3; XM_006719430.3; XM_006719432.4; XM_006719433.4; XM_011538399.1; XM_011538400.3; XM_017019348.1; XM_017019349.1; XM_017019350.1; XM_017019351.1; XM_017019352.1; XM_017019353.1; XM_017019354.1; XM_024448986.1; XM_024448987.1; XM_024448988.1; XR_001748718.1	10 (NM_001199302.1,NR_037615.1,XM_006719430.3,XM_006719429.3,XM_011538400.3); 11 (XM_017019350.1,XM_017019349.1,XM_017019348.1,XM_017019351.1); 12 (XM_017019352.1); 6 (XM_006719433.4); 7 (XM_017019354.1,XM_024448987.1,XM_017019353.1); 8 (XM_024448986.1,XM_006719432.4); 9 (NM_001199303.1,XM_024448988.1,XR_001748718.1,NM_014515.6,XM_011538399.1)	1889
CNOT2	CNOT2_05	CNOT2	NM_001199302.1; NM_001199303.1; NM_014515.6; NR_037615.1; XM_006719429.3; XM_006719430.3; XM_006719432.4; XM_006719433.4; XM_011538399.1; XM_011538400.3; XM_017019348.1; XM_017019349.1; XM_017019350.1; XM_017019351.1; XM_017019352.1; XM_017019353.1; XM_017019354.1; XM_024448986.1; XM_024448987.1; XR_001748718.1	12-13 (XM_006719433.4); 13-14 (XM_017019354.1,XM_024448987.1,XM_017019353.1); 14-15 (XM_024448986.1,XM_006719432.4); 15-16 (NM_001199303.1,XR_001748718.1,NM_014515.6,XM_011538399.1); 16-17 (NM_001199302.1,NR_037615.1,XM_006719430.3,XM_006719429.3,XM_011538400.3); 17-18 (XM_017019350.1,XM_017019349.1,XM_017019348.1,XM_017019351.1); 18-19 (XM_017019352.1)	1890
CNTFR	CNTFR_01	CNTFR	NM_001207011.1; NM_001842.5; NM_147164.3; XM_017014260.1; XM_017014261.1; XM_017014262.1; XM_017014263.1; XM_017014264.1; XM_017014265.1	5-6 (XM_017014265.1,NM_001842.5); 6-7 (XM_017014263.1,NM_001207011.1,NM_147164.3,XM_017014264.1); 7-8 (XM_017014261.1,XM_017014260.1,XM_017014262.1)	1891
CNTFR	CNTFR_02	CNTFR	NM_001207011.1; NM_001842.5; NM_147164.3; XM_017014260.1; XM_017014261.1; XM_017014262.1; XM_017014263.1; XM_017014264.1; XM_017014265.1	7 (XM_017014265.1,NM_001842.5); 8 (XM_017014263.1,NM_001207011.1,NM_147164.3,XM_017014264.1); 9 (XM_017014261.1,XM_017014260.1,XM_017014262.1)	1892
CNTFR	CNTFR_03	CNTFR	NM_001207011.1; NM_001842.5; NM_147164.3; XM_017014260.1; XM_017014261.1; XM_017014262.1; XM_017014263.1; XM_017014264.1; XM_017014265.1	5 (XM_017014265.1,NM_001842.5); 6 (XM_017014263.1,NM_001207011.1,NM_147164.3,XM_017014264.1); 7 (XM_017014261.1,XM_017014260.1,XM_017014262.1)	1893
CNTFR	CNTFR_04	CNTFR	NM_001207011.1; NM_001842.5; NM_147164.3; XM_017014260.1; XM_017014261.1; XM_017014262.1; XM_017014263.1; XM_017014264.1; XM_017014265.1	4-5 (XM_017014265.1,NM_001842.5); 5-6 (XM_017014263.1,NM_001207011.1,NM_147164.3,XM_017014264.1); 6-7 (XM_017014261.1,XM_017014260.1,XM_017014262.1)	1894
CNTFR	CNTFR_05	CNTFR	NM_001207011.1; NM_001842.5; NM_147164.3; XM_017014260.1; XM_017014261.1; XM_017014262.1; XM_017014263.1; XM_017014264.1; XM_017014265.1	5 (XM_017014265.1,NM_001842.5); 6 (XM_017014263.1,NM_001207011.1,NM_147164.3,XM_017014264.1); 7 (XM_017014261.1,XM_017014260.1,XM_017014262.1)	1895
COL11A1	COL11A1_01	COL11A1	NM_001190709.1; NM_001854.4; NM_080629.2; NR_134980.2; XM_017000334.1; XM_017000335.1; XM_017000336.1	6 (NM_001190709.1); 7 (NM_080629.2,NR_134980.2,NM_001854.4); 8 (XM_017000335.1,XM_017000336.1,XM_017000334.1)	1896
COL11A1	COL11A1_02	COL11A1	NM_001190709.1; NM_001854.4; NM_080629.2; NM_080630.4; NR_134980.2; XM_017000334.1; XM_017000335.1; XM_017000337.1	58-59 (XM_017000337.1); 62-63 (NM_080630.4); 63-64 (NM_001190709.1); 64-65 (NM_080629.2,NM_001854.4); 65-66 (XM_017000335.1,NR_134980.2,XM_017000334.1)	1897
COL11A1	COL11A1_03	COL11A1	NM_001190709.1; NM_001854.4; NM_080629.2; NM_080630.4; NR_134980.2; XM_017000334.1; XM_017000335.1; XM_017000336.1	2 (XM_017000335.1,XM_017000336.1,NM_080629.2,NR_134980.2,NM_001854.4,NM_001190709.1,XM_017000334.1,NM_080630.4)	1898
COL11A1	COL11A1_04	COL11A1	NM_001190709.1; NM_001854.4; NM_080629.2; NM_080630.4; NR_134980.2; XM_017000334.1; XM_017000335.1; XM_017000336.1; XM_017000337.1	10-11 (XM_017000335.1,XM_017000336.1,XM_017000334.1); 2-3 (XM_017000337.1); 7-8 (NM_080630.4); 8-9 (NM_001190709.1); 9-10 (NM_080629.2,NR_134980.2,NM_001854.4)	1899
COL11A1	COL11A1_05	COL11A1	NM_001190709.1; NM_001854.4; NM_080629.2; NM_080630.4; NR_134980.2; XM_017000334.1; XM_017000335.1; XM_017000336.1; XM_017000337.1	1-2 (XM_017000337.1); 6-7 (NM_080630.4); 7-8 (NM_001190709.1); 8-9 (NM_080629.2,NR_134980.2,NM_001854.4); 9-10 (XM_017000335.1,XM_017000336.1,XM_017000334.1)	1900
COL11A2	COL11A2_01	COL11A2	NM_080679.2; NM_080680.3; NM_080681.3; XM_011514299.2; XM_011514300.2; XM_011514302.2; XM_017010250.1; XM_017010251.2	59 (XM_017010251.2,XM_011514302.2); 60 (XM_011514300.2); 61 (XM_011514299.2); 63 (NM_080679.2); 64 (NM_080681.3); 66 (NM_080680.3); 67 (XM_017010250.1)	1901
COL11A2	COL11A2_02	COL11A2	NM_080679.2; NM_080680.3; NM_080681.3; XM_011514299.2; XM_011514300.2; XM_011514302.2; XM_017010250.1; XM_017010251.2	21-22 (XM_017010251.2,XM_011514302.2); 22-23 (XM_011514300.2); 23-24 (XM_011514299.2); 25-26 (NM_080679.2); 26-27 (NM_080681.3); 28-29 (NM_080680.3); 29-30 (XM_017010250.1)	1902
COL11A2	COL11A2_03	COL11A2	NM_001163771.2; NM_080679.2; NM_080680.3; NM_080681.3; XM_017010250.1	4 (NM_080681.3,NM_080679.2,NM_080680.3,NM_001163771.2); 5 (XM_017010250.1)	1903
COL11A2	COL11A2_04	COL11A2	NM_001163771.2; NM_080679.2; NM_080680.3; NM_080681.3; XM_017010250.1	1 (NM_080681.3,NM_080679.2,NM_080680.3,NM_001163771.2); 2 (XM_017010250.1)	1904
COL11A2	COL11A2_05	COL11A2	NM_080679.2; NM_080680.3; NM_080681.3; XM_011514299.2; XM_011514300.2; XM_011514302.2; XM_017010250.1; XM_017010251.2	59 (XM_017010251.2,XM_011514302.2); 60 (XM_011514300.2); 61 (XM_011514299.2); 63 (NM_080679.2); 64 (NM_080681.3); 66 (NM_080680.3); 67 (XM_017010250.1)	1905
COL17A1	COL17A1_01	COL17A1	NM_000494.4	9-10 (NM_000494.4)	1906
COL17A1	COL17A1_02	COL17A1	NM_000494.4	52 (NM_000494.4)	1907
COL17A1	COL17A1_03	COL17A1	NM_000494.4	46-47 (NM_000494.4)	1908
COL17A1	COL17A1_04	COL17A1	NM_000494.4	56 (NM_000494.4)	1909
COL17A1	COL17A1_05	COL17A1	NM_000494.4	14 (NM_000494.4)	1910
COL1A1	COL1A1_01	COL1A1	NM_000088.4; XM_005257058.4; XM_005257059.4; XM_011524341.1	35 (XM_005257059.4); 45 (XM_011524341.1); 46 (XM_005257058.4); 48 (NM_000088.4)	1911
COL1A1	COL1A1_02	COL1A1	NM_000088.4; XM_005257058.4; XM_005257059.4; XM_011524341.1	38 (XM_005257059.4); 48 (XM_011524341.1); 49 (XM_005257058.4); 51 (NM_000088.4)	1912
COL1A1	COL1A1_03	COL1A1	NM_000088.4; XM_005257059.4; XM_011524341.1	27 (XM_005257059.4); 37 (XM_011524341.1); 40 (NM_000088.4)	1913
COL1A1	COL1A1_04	COL1A1	NM_000088.4; XM_005257058.4; XM_005257059.4; XM_011524341.1	35 (XM_005257059.4); 45 (XM_011524341.1); 46 (XM_005257058.4); 48 (NM_000088.4)	1914
COL1A1	COL1A1_05	COL1A1	NM_000088.4; XM_005257058.4; XM_005257059.4; XM_011524341.1	36 (XM_005257059.4); 46 (XM_011524341.1); 47 (XM_005257058.4); 49 (NM_000088.4)	1915
COL1A2	COL1A2_01	COL1A2	NM_000089.4	50 (NM_000089.4)	1916
COL1A2	COL1A2_02	COL1A2	NM_000089.4	51 (NM_000089.4)	1917
COL1A2	COL1A2_03	COL1A2	NM_000089.4	1 (NM_000089.4)	1918
COL1A2	COL1A2_04	COL1A2	NM_000089.4	52 (NM_000089.4)	1919
COL1A2	COL1A2_05	COL1A2	NM_000089.4	51-52 (NM_000089.4)	1920
COL24A1	COL24A1_01	COL24A1	NM_001349955.1; NM_152890.7; NR_146340.2; NR_146341.2; NR_146342.2; NR_146343.1; NR_146344.1; NR_146345.1; XM_017000924.2; XM_017000925.2; XM_017000926.1; XM_017000927.1; XM_017000928.2; XM_017000929.2; XR_001737092.1	21 (XM_017000929.2); 22 (XM_017000928.2); 39 (NM_152890.7,NR_146342.2,NR_146343.1,XM_017000927.1,NR_146344.1,NM_001349955.1); 40 (XM_017000926.1,XR_001737092.1,NR_146341.2); 41 (NR_146340.2,XM_017000925.2,XM_017000924.2,NR_146345.1)	1921
COL24A1	COL24A1_02	COL24A1	NM_001349955.1; NM_152890.7; NR_146340.2; NR_146341.2; NR_146342.2; NR_146343.1; NR_146344.1; NR_146345.1; XM_017000924.2; XM_017000925.2; XM_017000926.1; XM_017000927.1; XM_017000928.2; XM_017000929.2	41 (XM_017000929.2); 42 (XM_017000928.2); 58 (NR_146344.1); 59 (NM_152890.7,NR_146343.1,XM_017000927.1,NR_146345.1,NM_001349955.1); 60 (NR_146342.2,NR_146340.2,XM_017000926.1,NR_146341.2); 61 (XM_017000925.2,XM_017000924.2)	1922
COL24A1	COL24A1_03	COL24A1	NM_001349955.1; NM_152890.7; NR_146340.2; NR_146341.2; NR_146342.2; NR_146343.1; NR_146344.1; NR_146345.1; XM_017000924.2; XM_017000925.2; XM_017000926.1; XM_017000927.1; XM_017000928.2; XM_017000929.2	39 (XM_017000929.2); 40 (XM_017000928.2); 56 (NR_146344.1); 57 (NM_152890.7,NR_146343.1,XM_017000927.1,NR_146345.1,NM_001349955.1); 58 (NR_146342.2,NR_146340.2,XM_017000926.1,NR_146341.2); 59 (XM_017000925.2,XM_017000924.2)	1923
COL24A1	COL24A1_04	COL24A1	NM_001349955.1; NM_152890.7; NR_146340.2; NR_146341.2; NR_146342.2; NR_146343.1; NR_146344.1; NR_146345.1; XM_017000924.2; XM_017000925.2; XM_017000926.1; XM_017000927.1; XM_017000928.2; XM_017000929.2	31-32 (XM_017000929.2); 32-33 (XM_017000928.2); 49-50 (NM_152890.7,NR_146342.2,NR_146343.1,XM_017000927.1,NR_146344.1,NM_001349955.1); 50-51 (XM_017000926.1,NR_146341.2); 51-52 (NR_146340.2,XM_017000925.2,XM_017000924.2,NR_146345.1)	1924
COL24A1	COL24A1_05	COL24A1	NM_001349955.1; NM_152890.7; NR_146340.2; NR_146341.2; NR_146342.2; NR_146343.1; NR_146344.1; NR_146345.1; XM_017000924.2; XM_017000925.2; XM_017000926.1; XM_017000927.1; XM_017000928.2; XM_017000929.2	42 (XM_017000929.2); 43 (XM_017000928.2); 59 (NR_146344.1); 60 (NM_152890.7,NR_146343.1,XM_017000927.1,NR_146345.1,NM_001349955.1); 61 (NR_146342.2,NR_146340.2,XM_017000926.1,NR_146341.2); 62 (XM_017000925.2,XM_017000924.2)	1925
COL27A1	COL27A1_01	COL27A1	NM_032888.4; XM_006717308.2; XM_006717310.3; XM_011519138.2; XM_011519140.1; XM_011519145.3; XR_929860.3	48 (XM_011519145.3); 59 (XM_006717310.3); 60 (XM_006717308.2,XM_011519140.1); 61 (XR_929860.3,NM_032888.4,XM_011519138.2)	1926
COL27A1	COL27A1_02	COL27A1	NM_032888.4; XM_006717308.2; XM_006717310.3; XM_011519138.2; XM_011519140.1; XM_011519145.3; XR_929860.3	48 (XM_011519145.3); 59 (XM_006717310.3); 60 (XM_006717308.2,XM_011519140.1); 61 (XR_929860.3,NM_032888.4,XM_011519138.2)	1927
COL27A1	COL27A1_03	COL27A1	NM_032888.4; XM_006717308.2; XM_011519138.2; XM_011519140.1; XM_011519142.3; XM_011519143.2; XM_011519144.2; XM_017015239.1; XR_001746405.1; XR_929860.3; XR_929861.2; XR_929862.1; XR_929863.1	3 (XM_006717308.2,XR_929860.3,NM_032888.4,XM_011519138.2,XM_011519140.1,XM_017015239.1,XM_011519144.2,XR_929862.1,XR_001746405.1,XM_011519142.3,XM_011519143.2,XR_929861.2,XR_929863.1)	1928
COL27A1	COL27A1_04	COL27A1	NM_032888.4; XM_006717308.2; XM_011519138.2; XM_011519140.1; XM_011519142.3; XM_011519143.2; XM_011519144.2; XM_017015239.1; XR_001746405.1; XR_929860.3; XR_929861.2; XR_929862.1; XR_929863.1	3 (XM_006717308.2,XR_929860.3,NM_032888.4,XM_011519138.2,XM_011519140.1,XM_017015239.1,XM_011519144.2,XR_929862.1,XR_001746405.1,XM_011519142.3,XM_011519143.2,XR_929861.2,XR_929863.1)	1929
COL27A1	COL27A1_05	COL27A1	NM_032888.4; XM_006717308.2; XM_011519138.2; XM_011519140.1; XM_011519142.3; XM_011519143.2; XM_011519144.2; XM_017015239.1; XR_001746405.1; XR_929860.3; XR_929861.2; XR_929862.1; XR_929863.1	3 (XM_006717308.2,XR_929860.3,NM_032888.4,XM_011519138.2,XM_011519140.1,XM_017015239.1,XM_011519144.2,XR_929862.1,XR_001746405.1,XM_011519142.3,XM_011519143.2,XR_929861.2,XR_929863.1)	1930
COL2A1	COL2A1_01	COL2A1	NM_001844.5; NM_033150.3; XM_017018828.1; XM_017018829.1; XM_017018830.1; XM_017018831.2	49 (NM_033150.3); 50 (XM_017018831.2,NM_001844.5); 51 (XM_017018830.1); 52 (XM_017018828.1,XM_017018829.1)	1931
COL2A1	COL2A1_02	COL2A1	NM_001844.5; NM_033150.3; XM_017018828.1; XM_017018829.1; XM_017018830.1; XM_017018831.2	50 (NM_033150.3); 51 (XM_017018831.2,NM_001844.5); 52 (XM_017018830.1); 53 (XM_017018828.1,XM_017018829.1)	1932
COL2A1	COL2A1_03	COL2A1	NM_001844.5; NM_033150.3; XM_017018828.1; XM_017018829.1; XM_017018830.1; XM_017018831.2	53 (NM_033150.3); 54 (XM_017018831.2,NM_001844.5); 55 (XM_017018830.1); 56 (XM_017018828.1,XM_017018829.1)	1933
COL2A1	COL2A1_04	COL2A1	NM_001844.5; NM_033150.3; XM_017018828.1; XM_017018829.1; XM_017018830.1; XM_017018831.2	53 (NM_033150.3); 54 (XM_017018831.2,NM_001844.5); 55 (XM_017018830.1); 56 (XM_017018828.1,XM_017018829.1)	1934
COL2A1	COL2A1_05	COL2A1	NM_001844.5; NM_033150.3; XM_017018828.1; XM_017018829.1; XM_017018830.1; XM_017018831.2	53 (NM_033150.3); 54 (XM_017018831.2,NM_001844.5); 55 (XM_017018830.1); 56 (XM_017018828.1,XM_017018829.1)	1935
COL3A1	COL3A1_01	COL3A1	NM_000090.4	49 (NM_000090.4)	1936
COL3A1	COL3A1_02	COL3A1	NM_000090.4	17-18 (NM_000090.4)	1937
COL3A1	COL3A1_03	COL3A1	NM_000090.4	27-28 (NM_000090.4)	1938
COL3A1	COL3A1_04	COL3A1	NM_000090.4	48-49 (NM_000090.4)	1939
COL3A1	COL3A1_05	COL3A1	NM_000090.4	49 (NM_000090.4)	1940
COL4A3	COL4A3_01	COL4A3	NM_000091.5; XM_005246277.3; XM_005246280.3; XM_006712245.3; XM_011510555.1; XM_011510556.2; XM_017003295.1; XR_001738601.1; XR_241280.3	19 (XM_011510556.2); 31 (XM_005246277.3); 32 (XM_006712245.3,XM_017003295.1,XR_001738601.1,NM_000091.5,XM_011510555.1,XR_241280.3,XM_005246280.3)	1941
COL4A3	COL4A3_02	COL4A3	NM_000091.5; XM_005246277.3; XM_006712245.3; XM_011510555.1; XM_011510556.2; XR_001738601.1; XR_241280.3	27 (XM_011510556.2); 39 (XM_005246277.3); 40 (XM_006712245.3,XR_001738601.1,NM_000091.5,XM_011510555.1,XR_241280.3)	1942
COL4A3	COL4A3_03	COL4A3	NM_000091.5; XM_005246277.3; XM_011510556.2; XR_241280.3	39 (XM_011510556.2); 51 (XR_241280.3,XM_005246277.3); 52 (NM_000091.5)	1943
COL4A3	COL4A3_04	COL4A3	NM_000091.5; XM_005246277.3; XM_011510556.2; XR_241280.3	39 (XM_011510556.2); 51 (XR_241280.3,XM_005246277.3); 52 (NM_000091.5)	1944
COL4A3	COL4A3_05	COL4A3	NM_000091.5; XM_005246277.3; XM_011510555.1; XM_011510556.2; XR_241280.3	38 (XM_011510556.2); 50 (XR_241280.3,XM_005246277.3); 51 (NM_000091.5,XM_011510555.1)	1945
COL4A4	COL4A4_01	COL4A4	NM_000092.5; XR_001738604.1	47 (XR_001738604.1); 48 (NM_000092.5)	1946
COL4A4	COL4A4_02	COL4A4	NM_000092.5; XR_001738604.1	47 (XR_001738604.1); 48 (NM_000092.5)	1947
COL4A4	COL4A4_03	COL4A4	NM_000092.5; XM_005246281.3; XM_005246282.3; XM_006712246.3; XM_011510557.2; XM_011510558.2; XM_011510572.3; XM_017003297.1; XR_001738604.1	27 (XM_011510572.3); 42 (XM_005246282.3); 47 (XR_001738604.1,XM_006712246.3,XM_011510558.2); 48 (NM_000092.5,XM_017003297.1,XM_005246281.3); 49 (XM_011510557.2)	1948
COL4A4	COL4A4_04	COL4A4	NM_000092.5; XM_005246281.3; XM_005246282.3; XM_006712246.3; XM_011510557.2; XM_011510558.2; XM_011510559.2; XM_011510560.2; XM_011510561.2; XM_011510562.2; XM_011510572.3; XM_017003296.1; XM_017003297.1; XM_017003298.1; XR_001738602.1; XR_001738603.1; XR_922837.2	25-26 (XM_011510572.3); 40-41 (XM_005246282.3); 45-46 (XM_006712246.3,XM_011510558.2); 46-47 (NM_000092.5,XM_017003297.1,XM_005246281.3,XR_922837.2,XM_017003296.1,XM_011510562.2,XM_011510560.2,XR_001738602.1,XM_011510559.2,XR_001738603.1,XM_017003298.1,XM_011510561.2); 47-48 (XM_011510557.2)	1949
COL4A4	COL4A4_05	COL4A4	NM_000092.5; XM_005246281.3; XM_005246282.3; XM_006712246.3; XM_011510557.2; XM_011510558.2; XM_011510572.3; XM_017003297.1; XR_001738604.1	27 (XM_011510572.3); 42 (XM_005246282.3); 47 (XR_001738604.1,XM_006712246.3,XM_011510558.2); 48 (NM_000092.5,XM_017003297.1,XM_005246281.3); 49 (XM_011510557.2)	1950
COL4A5	COL4A5_01	COL4A5	NM_000495.5; NM_033380.3; XM_011530849.2; XM_017029259.2; XM_017029260.1; XM_017029261.1; XM_017029262.2	6 (NM_033380.3,NM_000495.5); 7 (XM_017029261.1,XM_017029259.2,XM_011530849.2,XM_017029262.2,XM_017029260.1)	1951
COL4A5	COL4A5_02	COL4A5	NM_000495.5; NM_033380.3; XM_011530849.2; XM_017029259.2; XM_017029260.1; XM_017029263.2	38 (XM_017029263.2); 51 (NM_000495.5); 52 (XM_017029260.1); 53 (NM_033380.3,XM_017029259.2); 54 (XM_011530849.2)	1952
COL4A5	COL4A5_03	COL4A5	NM_000495.5; NM_033380.3; XM_011530849.2; XM_017029259.2; XM_017029260.1; XM_017029263.2	36 (XM_017029263.2); 49 (NM_000495.5); 50 (XM_017029260.1); 51 (NM_033380.3,XM_017029259.2); 52 (XM_011530849.2)	1953
COL4A5	COL4A5_04	COL4A5	NM_000495.5; NM_033380.3; XM_011530849.2; XM_017029259.2; XM_017029260.1; XM_017029261.1; XM_017029262.2; XM_017029263.2	21-22 (NM_033380.3,NM_000495.5); 22-23 (XM_017029261.1,XM_017029259.2,XM_011530849.2,XM_017029262.2,XM_017029260.1); 6-7 (XM_017029263.2)	1954
COL4A5	COL4A5_05	COL4A5	NM_000495.5; NM_033380.3; XM_011530849.2; XM_017029259.2; XM_017029260.1; XM_017029263.2	38 (XM_017029263.2); 51 (NM_000495.5); 52 (XM_017029260.1); 53 (NM_033380.3,XM_017029259.2); 54 (XM_011530849.2)	1955
COL4A6	COL4A6_01	COL4A6	NM_001287758.1; NM_001287759.1; NM_001287760.1; NM_001847.4; NM_033641.4; XM_006724617.3; XM_011530852.2; XM_011530853.3	43 (NM_001287760.1); 44 (XM_011530853.3,NM_001287759.1); 45 (XM_011530852.2,NM_033641.4,NM_001847.4); 46 (XM_006724617.3,NM_001287758.1)	1956
COL4A6	COL4A6_02	COL4A6	NM_001287758.1; NM_001287759.1; NM_001287760.1; NM_001847.4; NM_033641.4; XM_006724617.3; XM_011530852.2; XM_011530853.3; XM_011530854.2	32 (XM_011530853.3); 33 (NM_001287760.1,NM_033641.4,NM_001287759.1,NM_001847.4); 34 (XM_006724617.3,XM_011530852.2,NM_001287758.1,XM_011530854.2)	1957
COL4A6	COL4A6_03	COL4A6	NM_001287758.1; NM_001287759.1; NM_001287760.1; NM_001847.4; NM_033641.4; XM_006724617.3; XM_011530852.2; XM_011530853.3	43 (NM_001287760.1); 44 (XM_011530853.3,NM_001287759.1); 45 (XM_011530852.2,NM_033641.4,NM_001847.4); 46 (XM_006724617.3,NM_001287758.1)	1958
COL4A6	COL4A6_04	COL4A6	NM_001287758.1; NM_001287759.1; NM_001287760.1; NM_001847.4; NM_033641.4; XM_006724617.3; XM_011530852.2; XM_011530853.3	43 (NM_001287760.1); 44 (XM_011530853.3,NM_001287759.1); 45 (XM_011530852.2,NM_033641.4,NM_001847.4); 46 (XM_006724617.3,NM_001287758.1)	1959
COL4A6	COL4A6_05	COL4A6	NM_001287758.1; NM_001287759.1; NM_001287760.1; NM_001847.4; NM_033641.4; XM_006724617.3; XM_011530852.2; XM_011530853.3; XM_011530854.2; XR_001755650.1	17-18 (XM_011530853.3); 19-20 (NM_001287760.1,XM_006724617.3,XM_011530852.2,NM_001287758.1,NM_033641.4,NM_001287759.1,NM_001847.4,XM_011530854.2,XR_001755650.1)	1960
COL5A1	COL5A1_01	COL5A1	NM_000093.5; NM_001278074.1; XM_017014266.2; XR_001746183.1	63 (XM_017014266.2,XR_001746183.1,NM_001278074.1,NM_000093.5)	1961
COL5A1	COL5A1_02	COL5A1	NM_000093.5; NM_001278074.1	66 (NM_001278074.1,NM_000093.5)	1962
COL5A1	COL5A1_03	COL5A1	NM_000093.5; NM_001278074.1; XM_017014266.2; XR_001746183.1	2 (XM_017014266.2,XR_001746183.1,NM_001278074.1,NM_000093.5)	1963
COL5A1	COL5A1_04	COL5A1	NM_000093.5; NM_001278074.1	66 (NM_001278074.1,NM_000093.5)	1964
COL5A1	COL5A1_05	COL5A1	NM_000093.5; NM_001278074.1	66 (NM_001278074.1,NM_000093.5)	1965
COL5A2	COL5A2_01	COL5A2	NM_000393.5; XM_011510573.3	54 (XM_011510573.3,NM_000393.5)	1966
COL5A2	COL5A2_02	COL5A2	NM_000393.5; XM_011510573.3	52 (XM_011510573.3,NM_000393.5)	1967
COL5A2	COL5A2_03	COL5A2	NM_000393.5; XM_011510573.3	54 (XM_011510573.3,NM_000393.5)	1968
COL5A2	COL5A2_04	COL5A2	NM_000393.5; XM_011510573.3	54 (XM_011510573.3,NM_000393.5)	1969
COL5A2	COL5A2_05	COL5A2	NM_000393.5; XM_011510573.3	52 (XM_011510573.3,NM_000393.5)	1970
COL6A3	COL6A3_01	COL6A3	NM_004369.4; NM_057166.5; NM_057167.3; XM_005246065.1; XM_006712253.1; XM_011510574.1; XM_017003304.1; XM_024452684.1	10 (XM_005246065.1,NM_057167.3); 11 (XM_006712253.1,NM_004369.4,XM_011510574.1); 13 (XM_017003304.1); 8 (NM_057166.5); 9 (XM_024452684.1)	1971
COL6A3	COL6A3_02	COL6A3	NM_004369.4; NM_057166.5; NM_057167.3; XM_005246065.1; XM_006712253.1; XM_011510574.1; XM_017003304.1; XM_024452684.1	41 (NM_057166.5); 42 (XM_024452684.1); 43 (XM_005246065.1,NM_057167.3); 44 (XM_006712253.1,NM_004369.4,XM_011510574.1); 46 (XM_017003304.1)	1972
COL6A3	COL6A3_03	COL6A3	NM_004369.4; NM_057166.5; NM_057167.3; XM_005246065.1; XM_006712253.1; XM_011510574.1; XM_017003304.1; XM_024452684.1	38 (NM_057166.5); 39 (XM_024452684.1); 40 (XM_005246065.1,NM_057167.3); 41 (XM_006712253.1,NM_004369.4,XM_011510574.1); 43 (XM_017003304.1)	1973
COL6A3	COL6A3_04	COL6A3	NM_004369.4; NM_057166.5; NM_057167.3; XM_005246065.1; XM_006712253.1; XM_011510574.1; XM_017003304.1; XM_024452684.1	11 (NM_057166.5); 12 (XM_024452684.1); 13 (XM_005246065.1,NM_057167.3); 14 (XM_006712253.1,NM_004369.4,XM_011510574.1); 16 (XM_017003304.1)	1974
COL6A3	COL6A3_05	COL6A3	NM_004369.4; NM_057164.5; NM_057165.5; NM_057166.5; NM_057167.3; XM_005246065.1; XM_006712253.1; XM_011510574.1; XM_017003304.1; XM_024452684.1	4 (NM_057166.5); 5 (XM_024452684.1,NM_057164.5); 6 (XM_005246065.1,NM_057167.3,NM_057165.5); 7 (XM_006712253.1,NM_004369.4,XM_011510574.1); 9 (XM_017003304.1)	1975
COL6A6	COL6A6_01	COL6A6	NM_001102608.2; XM_005247121.5; XM_011512423.3; XM_011512424.2; XM_011512425.3; XM_011512426.3; XM_011512428.3; XM_011512431.2; XM_011512432.2; XM_017005711.2; XM_017005712.2; XM_017005713.2; XM_017005714.2; XM_017005715.2; XM_017005716.1; XR_924103.2	5 (NM_001102608.2); 6 (XM_011512423.3,XM_011512424.2,XR_924103.2,XM_011512431.2,XM_011512432.2,XM_017005716.1); 7 (XM_011512428.3,XM_005247121.5,XM_017005714.2); 8 (XM_017005715.2,XM_017005712.2,XM_011512426.3,XM_011512425.3); 9 (XM_017005713.2,XM_017005711.2)	1976
COL6A6	COL6A6_02	COL6A6	NM_001102608.2; XM_005247121.5; XM_011512423.3; XM_011512424.2; XM_011512425.3; XM_011512426.3; XM_011512428.3; XM_017005711.2; XM_017005712.2; XM_017005713.2; XM_017005714.2; XM_017005715.2; XR_924103.2	34 (NM_001102608.2); 35 (XM_011512423.3,XM_011512424.2,XR_924103.2); 36 (XM_011512428.3,XM_005247121.5,XM_017005714.2); 37 (XM_017005715.2,XM_017005712.2,XM_011512426.3,XM_011512425.3); 38 (XM_017005713.2,XM_017005711.2)	1977
COL6A6	COL6A6_03	COL6A6	NM_001102608.2; XM_005247121.5; XM_011512423.3; XM_011512424.2; XM_011512425.3; XM_011512426.3; XM_011512428.3; XM_011512431.2; XM_011512432.2; XM_017005711.2; XM_017005712.2; XM_017005713.2; XM_017005714.2; XM_017005715.2; XM_017005716.1; XR_924103.2	10 (XM_017005713.2,XM_017005711.2); 6 (NM_001102608.2); 7 (XM_011512423.3,XM_011512424.2,XR_924103.2,XM_011512431.2,XM_011512432.2,XM_017005716.1); 8 (XM_011512428.3,XM_005247121.5,XM_017005714.2); 9 (XM_017005715.2,XM_017005712.2,XM_011512426.3,XM_011512425.3)	1978
COL6A6	COL6A6_04	COL6A6	NM_001102608.2; XM_005247121.5; XM_011512423.3; XM_011512424.2; XM_011512425.3; XM_011512426.3; XM_011512428.3; XM_011512431.2; XM_011512432.2; XM_017005711.2; XM_017005712.2; XM_017005713.2; XM_017005714.2; XM_017005715.2; XM_017005716.1; XR_924103.2	5 (NM_001102608.2); 6 (XM_011512423.3,XM_011512424.2,XR_924103.2,XM_011512431.2,XM_011512432.2,XM_017005716.1); 7 (XM_011512428.3,XM_005247121.5,XM_017005714.2); 8 (XM_017005715.2,XM_017005712.2,XM_011512426.3,XM_011512425.3); 9 (XM_017005713.2,XM_017005711.2)	1979
COL6A6	COL6A6_05	COL6A6	NM_001102608.2; XM_005247121.5; XM_011512423.3; XM_011512424.2; XM_011512425.3; XM_011512426.3; XM_011512428.3; XM_011512431.2; XM_011512432.2; XM_017005711.2; XM_017005712.2; XM_017005713.2; XM_017005714.2; XM_017005715.2; XM_017005716.1; XR_924103.2	10 (XM_017005713.2,XM_017005711.2); 6 (NM_001102608.2); 7 (XM_011512423.3,XM_011512424.2,XR_924103.2,XM_011512431.2,XM_011512432.2,XM_017005716.1); 8 (XM_011512428.3,XM_005247121.5,XM_017005714.2); 9 (XM_017005715.2,XM_017005712.2,XM_011512426.3,XM_011512425.3)	1980
COLEC12	COLEC12_01	COLEC12	NM_130386.3; XM_011525741.2	4 (XM_011525741.2); 5 (NM_130386.3)	1981
COLEC12	COLEC12_02	COLEC12	NM_130386.3; XM_011525741.2	4 (XM_011525741.2); 5 (NM_130386.3)	1982
COLEC12	COLEC12_03	COLEC12	NM_130386.3; XM_011525741.2	4 (XM_011525741.2); 5 (NM_130386.3)	1983
COLEC12	COLEC12_04	COLEC12	NM_130386.3; XM_011525741.2	8-9 (XM_011525741.2); 9-10 (NM_130386.3)	1984
COLEC12	COLEC12_05	COLEC12	NM_130386.3; XM_011525741.2	3 (XM_011525741.2); 4 (NM_130386.3)	1985
COMP	COMP_01	COMP	NM_000095.3	14 (NM_000095.3)	1986
COMP	COMP_02	COMP	NM_000095.3	2-3 (NM_000095.3)	1987
COMP	COMP_03	COMP	NM_000095.3	11-12 (NM_000095.3)	1988
COMP	COMP_04	COMP	NM_000095.3	7 (NM_000095.3)	1989
COMP	COMP_05	COMP	NM_000095.3	15-16 (NM_000095.3)	1990
COX4I1	COX4I1_01	COX4I1	NM_001318794.2	5 (NM_001318794.2)	1991
COX4I1	COX4I1_02	COX4I1	NM_001318786.2; NM_001318788.2; NM_001318794.2; NM_001318797.2; NM_001318802.2; NM_001861.6; XM_024450156.1	1-2 (NM_001318794.2,NM_001318797.2,NM_001318788.2,NM_001861.6,NM_001318802.2,XM_024450156.1); 2 (NM_001318786.2)	1992
COX4I1	COX4I1_03	COX4I1	NM_001318786.2; NM_001318788.2; NM_001318794.2; NM_001318797.2; NM_001318802.2; NM_001861.6; XM_024450156.1	4 (NM_001318794.2,NM_001318797.2,NM_001318788.2,NM_001861.6,NM_001318802.2,XM_024450156.1,NM_001318786.2)	1993
COX4I1	COX4I1_04	COX4I1	NM_001318786.2; NM_001318788.2; NM_001318794.2; NM_001318797.2; NM_001318802.2; NM_001861.6; XM_024450156.1	2-3 (NM_001318794.2,NM_001318797.2,NM_001318788.2,NM_001861.6,NM_001318802.2,XM_024450156.1,NM_001318786.2)	1994
COX4I1	COX4I1_05	COX4I1	NM_001318786.2; NM_001318788.2; NM_001318794.2; NM_001318797.2; NM_001318802.2; NM_001861.6; XM_024450156.1	3 (NM_001318794.2,NM_001318797.2,NM_001318788.2,NM_001861.6,NM_001318802.2,XM_024450156.1,NM_001318786.2)	1995
COX5B	COX5B_01	COX5B	NM_001862.3	2 (NM_001862.3)	1996
COX5B	COX5B_02	COX5B	NM_001862.3	2-3 (NM_001862.3)	1997
COX5B	COX5B_03	COX5B	NM_001862.3	3 (NM_001862.3)	1998
COX5B	COX5B_04	COX5B	NM_001862.3	3-4 (NM_001862.3)	1999
COX5B	COX5B_05	COX5B	NM_001862.3	4 (NM_001862.3)	2000
COX6A1	COX6A1_01	COX6A1	NM_004373.4	1 (NM_004373.4)	2001
COX6A1	COX6A1_02	COX6A1	NM_004373.4	2-3 (NM_004373.4)	2002
COX6A1	COX6A1_03	COX6A1	NM_004373.4	3 (NM_004373.4)	2003
COX6A1	COX6A1_04	COX6A1	NM_004373.4	3 (NM_004373.4)	2004
COX6A1	COX6A1_05	COX6A1	NM_004373.4	2 (NM_004373.4)	2005
COX6B1	COX6B1_01	COX6B1	NM_001863.5	1-2 (NM_001863.5)	2006
COX6B1	COX6B1_02	COX6B1	NM_001863.5	2 (NM_001863.5)	2007
COX6B1	COX6B1_03	COX6B1	NM_001863.5	2-3 (NM_001863.5)	2008
COX6B1	COX6B1_04	COX6B1	NM_001863.5	3 (NM_001863.5)	2009
COX6B1	COX6B1_05	COX6B1	NM_001863.5	3 (NM_001863.5)	2010
CPA3	CPA3_01	CPA3	NM_001870.4	2 (NM_001870.4)	2011
CPA3	CPA3_02	CPA3	NM_001870.4	1 (NM_001870.4)	2012
CPA3	CPA3_03	CPA3	NM_001870.4	11 (NM_001870.4)	2013
CPA3	CPA3_04	CPA3	NM_001870.4	8 (NM_001870.4)	2014
CPA3	CPA3_05	CPA3	NM_001870.4	11 (NM_001870.4)	2015
CPSF7	CPSF7_01	CPSF7	NM_001136040.4; NM_001142565.3; NM_024811.4; NR_165413.1; NR_165414.1; NR_165415.1; NR_165416.1; NR_165417.1; NR_165418.1; NR_165419.1; NR_165420.1; XM_005274298.4; XM_005274299.4; XM_005274303.4; XM_011545257.2; XM_011545258.2; XM_011545259.2; XM_011545261.2; XM_011545263.2; XM_017018345.1	10 (NR_165416.1,NM_024811.4,NM_001136040.4,NM_001142565.3,NR_165417.1,XM_005274299.4,XM_005274298.4,XM_011545258.2,XM_011545259.2); 11 (NR_165415.1,NR_165413.1,NR_165419.1,NR_165414.1,NR_165418.1,XM_017018345.1,XM_005274303.4,XM_011545257.2,XM_011545263.2,XM_011545261.2); 12 (NR_165420.1)	2016
CPSF7	CPSF7_02	CPSF7	NM_001136040.4; NM_001142565.3; NM_024811.4; NR_165413.1; NR_165414.1; NR_165415.1; NR_165416.1; NR_165417.1; NR_165418.1; NR_165419.1; NR_165420.1; XM_005274298.4; XM_005274299.4; XM_005274303.4; XM_011545257.2; XM_011545258.2; XM_011545259.2; XM_011545261.2; XM_011545263.2; XM_017018345.1	10 (NR_165416.1,NM_024811.4,NM_001136040.4,NM_001142565.3,NR_165417.1,XM_005274299.4,XM_005274298.4,XM_011545258.2,XM_011545259.2); 11 (NR_165415.1,NR_165420.1,NR_165413.1,NR_165419.1,NR_165414.1,NR_165418.1,XM_017018345.1,XM_005274303.4,XM_011545257.2,XM_011545263.2,XM_011545261.2)	2017
CPSF7	CPSF7_03	CPSF7	NM_001136040.4; NM_001142565.3; NM_024811.4; NR_165413.1; NR_165414.1; NR_165415.1; NR_165416.1; NR_165417.1; NR_165418.1; NR_165419.1; NR_165420.1; XM_005274298.4; XM_005274299.4; XM_005274303.4; XM_011545257.2; XM_011545258.2; XM_011545259.2; XM_011545261.2; XM_011545263.2; XM_017018345.1	10 (NR_165416.1,NM_024811.4,NM_001136040.4,NM_001142565.3,NR_165417.1,XM_005274299.4,XM_005274298.4,XM_011545258.2,XM_011545259.2); 11 (NR_165415.1,NR_165420.1,NR_165413.1,NR_165419.1,NR_165414.1,NR_165418.1,XM_017018345.1,XM_005274303.4,XM_011545257.2,XM_011545263.2,XM_011545261.2)	2018
CPSF7	CPSF7_04	CPSF7	NM_001136040.4; NM_001142565.3; NM_024811.4; NR_165413.1; NR_165414.1; NR_165415.1; NR_165416.1; NR_165417.1; NR_165418.1; NR_165419.1; NR_165420.1; XM_005274298.4; XM_005274299.4; XM_005274303.4; XM_011545257.2; XM_011545258.2; XM_011545259.2; XM_011545261.2; XM_011545263.2; XM_017018345.1	10 (NR_165416.1,NM_024811.4,NM_001136040.4,NM_001142565.3,NR_165417.1,XM_005274299.4,XM_005274298.4,XM_011545258.2,XM_011545259.2); 11 (NR_165415.1,NR_165420.1,NR_165413.1,NR_165419.1,NR_165414.1,NR_165418.1,XM_017018345.1,XM_005274303.4,XM_011545257.2,XM_011545263.2,XM_011545261.2)	2019
CPSF7	CPSF7_05	CPSF7	NM_001136040.4; NM_001142565.3; NM_024811.4; NR_165413.1; NR_165414.1; NR_165415.1; NR_165416.1; NR_165417.1; NR_165418.1; NR_165419.1; NR_165420.1; XM_005274298.4; XM_005274299.4; XM_005274303.4; XM_011545257.2; XM_011545258.2; XM_011545259.2; XM_011545261.2; XM_011545263.2; XM_017018345.1	8 (NR_165416.1,NM_024811.4,NM_001136040.4,NM_001142565.3,NR_165417.1,XM_005274299.4,XM_005274298.4,XM_011545258.2,XM_011545259.2); 9 (NR_165415.1,NR_165420.1,NR_165413.1,NR_165419.1,NR_165414.1,NR_165418.1,XM_017018345.1,XM_005274303.4,XM_011545257.2,XM_011545263.2,XM_011545261.2)	2020
CR1	CR1_01	CR1	NM_000573.4; NM_000651.6; XM_006711166.2; XM_011509205.1; XM_024453287.1	10-18 (NM_000573.4,XM_024453287.1); 10-26 (XM_011509205.1,NM_000651.6,XM_006711166.2)	2021
CR1	CR1_02	CR1	NM_000573.4; NM_000651.6; XM_006711166.2; XM_011509205.1; XM_024453287.1	10-18 (NM_000573.4,XM_024453287.1); 10-26 (XM_011509205.1,NM_000651.6,XM_006711166.2)	2022
CR1	CR1_03	CR1	NM_000573.4; NM_000651.6; XM_006711166.2; XM_011509205.1; XM_024453287.1	10-26 (NM_000573.4,XM_024453287.1); 10-34 (XM_011509205.1,NM_000651.6,XM_006711166.2)	2023
CR1	CR1_04	CR1	NM_000573.4; NM_000651.6; XM_006711166.2; XM_011509205.1; XM_024453287.1	10-19 (NM_000573.4,XM_024453287.1); 10-27 (XM_011509205.1,NM_000651.6,XM_006711166.2)	2024
CR1	CR1_05	CR1	NM_000573.4; NM_000651.6; XM_006711166.2; XM_011509205.1; XM_024453287.1	29 (NM_000573.4,XM_024453287.1); 37 (XM_011509205.1,NM_000651.6,XM_006711166.2)	2025
CR2	CR2_01	CR2	NM_001006658.3; NM_001877.5; XM_011509206.3	18 (NM_001877.5); 19 (NM_001006658.3,XM_011509206.3)	2026
CR2	CR2_02	CR2	NM_001006658.3; NM_001877.5; XM_011509206.3	4 (NM_001006658.3,NM_001877.5,XM_011509206.3)	2027
CR2	CR2_03	CR2	NM_001006658.3; NM_001877.5; XM_011509206.3	13 (NM_001877.5); 14 (NM_001006658.3,XM_011509206.3)	2028
CR2	CR2_04	CR2	NM_001006658.3; NM_001877.5; XM_011509206.3	13 (NM_001877.5); 14 (NM_001006658.3,XM_011509206.3)	2029
CR2	CR2_05	CR2	NM_001006658.3; NM_001877.5; XM_011509206.3	6 (NM_001006658.3,NM_001877.5,XM_011509206.3)	2030
CRABP2	CRABP2_01	CRABP2	NM_001199723.1; NM_001878.4	2 (NM_001878.4); 3 (NM_001199723.1)	2031
CRABP2	CRABP2_02	CRABP2	NM_001199723.1; NM_001878.4	4 (NM_001878.4); 5 (NM_001199723.1)	2032
CRABP2	CRABP2_03	CRABP2	NM_001199723.1; NM_001878.4	3 (NM_001878.4); 4 (NM_001199723.1)	2033
CRABP2	CRABP2_04	CRABP2	NM_001199723.1; NM_001878.4	2 (NM_001878.4); 3 (NM_001199723.1)	2034
CRABP2	CRABP2_05	CRABP2	NM_001199723.1; NM_001878.4	3-4 (NM_001878.4); 4-5 (NM_001199723.1)	2035
CREB1	CREB1_01	CREB1	NM_001320793.2; NM_001371426.1; NM_001371427.1; NM_001371428.1; NM_004379.5; NM_134442.5; NR_135473.2; NR_163946.1; NR_163947.1; XM_011510646.3; XM_011510648.3; XM_011510650.3; XM_017003399.2; XM_017003401.2; XR_001738636.2; XR_001738637.2; XR_241290.2; XR_241292.2	3 (NM_001371428.1,XM_017003401.2); 4 (NM_001371427.1,XR_001738637.2,NR_163947.1,NM_004379.5,XM_011510650.3,NM_001320793.2,NR_163946.1,XM_017003399.2); 5 (XR_001738636.2,NM_134442.5,NM_001371426.1,XR_241292.2,XM_011510646.3,XR_241290.2,XM_011510648.3,NR_135473.2)	2036
CREB1	CREB1_02	CREB1	NM_001320793.2; NM_004379.5; NM_134442.5; NR_135473.2; NR_163946.1; XM_011510646.3; XM_011510648.3; XM_017003399.2; XR_001738636.2; XR_001738637.2; XR_241290.2; XR_241292.2	1 (XR_001738637.2,NM_004379.5,XR_001738636.2,NM_134442.5,NM_001320793.2,XR_241292.2,XM_011510646.3,XR_241290.2,NR_163946.1,XM_011510648.3,XM_017003399.2,NR_135473.2)	2037
CREB1	CREB1_03	CREB1	NM_001371426.1; NM_001371427.1; NM_001371428.1; NM_004379.5; NM_134442.5; NR_135473.2; NR_163946.1; NR_163947.1; XM_011510646.3; XM_011510650.3; XM_017003401.2; XR_001738636.2; XR_001738637.2; XR_241290.2; XR_241292.2	10 (XR_001738636.2,XR_241292.2,XM_011510646.3,NR_135473.2); 11 (XR_241290.2); 7 (NM_001371428.1); 8 (NM_001371427.1,NM_004379.5,XM_011510650.3,XM_017003401.2); 9 (XR_001738637.2,NR_163947.1,NM_134442.5,NM_001371426.1,NR_163946.1)	2038
CREB1	CREB1_04	CREB1	NM_001320793.2; NM_001371426.1; NM_001371427.1; NM_001371428.1; NM_004379.5; NM_134442.5; NR_135473.2; NR_163946.1; NR_163947.1; XM_011510646.3; XM_011510648.3; XM_011510650.3; XM_017003399.2; XM_017003401.2; XR_001738636.2; XR_001738637.2; XR_241290.2; XR_241292.2	4-5 (NM_001371428.1,XM_017003401.2); 5-6 (NM_001371427.1,XR_001738637.2,NR_163947.1,NM_004379.5,XM_011510650.3,NM_001320793.2,NR_163946.1,XM_017003399.2); 6-7 (XR_001738636.2,NM_134442.5,NM_001371426.1,XR_241292.2,XM_011510646.3,XR_241290.2,XM_011510648.3,NR_135473.2)	2039
CREB1	CREB1_05	CREB1	NM_001371426.1; NM_001371427.1; NM_001371428.1; NM_004379.5; NM_134442.5; NR_135473.2; NR_163946.1; NR_163947.1; XM_011510646.3; XM_011510650.3; XM_017003401.2; XR_001738636.2; XR_001738637.2; XR_241290.2; XR_241292.2	10 (XR_001738636.2,XR_241292.2,XM_011510646.3,NR_135473.2); 11 (XR_241290.2); 7 (NM_001371428.1); 8 (NM_001371427.1,NM_004379.5,XM_011510650.3,XM_017003401.2); 9 (XR_001738637.2,NR_163947.1,NM_134442.5,NM_001371426.1,NR_163946.1)	2040
CREB3L1	CREB3L1_01	CREB3L1	NM_052854.4; XM_006718380.3	6-7 (NM_052854.4,XM_006718380.3)	2041
CREB3L1	CREB3L1_02	CREB3L1	NM_052854.4	11-12 (NM_052854.4)	2042
CREB3L1	CREB3L1_03	CREB3L1	NM_052854.4; XM_006718380.3	1 (NM_052854.4,XM_006718380.3)	2043
CREB3L1	CREB3L1_04	CREB3L1	NM_052854.4; XM_006718380.3	7 (NM_052854.4,XM_006718380.3)	2044
CREB3L1	CREB3L1_05	CREB3L1	NM_052854.4	12 (NM_052854.4)	2045
CREB3L3	CREB3L3_01	CREB3L3	NM_001271995.2; NM_001271996.2; NM_001271997.2; NM_032607.3	1 (NM_001271997.2,NM_001271995.2,NM_032607.3,NM_001271996.2)	2046
CREB3L3	CREB3L3_02	CREB3L3	NM_001271995.2; NM_001271996.2; NM_001271997.2; NM_032607.3	7 (NM_001271997.2); 8 (NM_001271995.2,NM_032607.3,NM_001271996.2)	2047
CREB3L3	CREB3L3_03	CREB3L3	NM_001271995.2; NM_001271996.2; NM_032607.3	6-7 (NM_001271995.2,NM_032607.3,NM_001271996.2)	2048
CREB3L3	CREB3L3_04	CREB3L3	NM_001271995.2; NM_001271996.2; NM_032607.3	6 (NM_001271995.2,NM_032607.3,NM_001271996.2)	2049
CREB3L3	CREB3L3_05	CREB3L3	NM_001271995.2; NM_001271996.2; NM_001271997.2; NM_032607.3	1-2 (NM_001271997.2,NM_001271995.2,NM_032607.3,NM_001271996.2)	2050
CREB3L4	CREB3L4_01	CREB3L4	NM_001255978.2; NM_001255979.2; NM_001255980.2; NM_001255981.2; NM_130898.4; NR_045658.2; XM_006711172.2; XM_017000372.1; XM_024453343.1; XM_024453344.1; XM_024453346.1	5 (NR_045658.2); 6 (XM_017000372.1,NM_001255981.2,NM_130898.4,NM_001255979.2,NM_001255978.2,XM_024453344.1,NM_001255980.2,XM_024453346.1,XM_024453343.1,XM_006711172.2)	2051
CREB3L4	CREB3L4_02	CREB3L4	NM_001255978.2; NM_001255979.2; NM_001255980.2; NM_001255981.2; NM_130898.4; NR_045658.2; XM_006711172.2; XM_017000372.1; XM_024453343.1; XM_024453344.1; XM_024453346.1	10 (XM_017000372.1,NM_001255981.2,NM_130898.4,NM_001255979.2,NM_001255978.2,XM_024453344.1,NM_001255980.2,XM_024453346.1,XM_024453343.1,XM_006711172.2); 9 (NR_045658.2)	2052
CREB3L4	CREB3L4_03	CREB3L4	NM_001255978.2; NM_001255979.2; NM_001255980.2; NM_001255981.2; NM_130898.4; NR_045658.2; XM_006711172.2; XM_017000372.1; XM_024453343.1; XM_024453344.1; XM_024453346.1	6-7 (NR_045658.2); 7-8 (XM_017000372.1,NM_001255981.2,NM_130898.4,NM_001255979.2,NM_001255978.2,XM_024453344.1,NM_001255980.2,XM_024453346.1,XM_024453343.1,XM_006711172.2)	2053
CREB3L4	CREB3L4_04	CREB3L4	NM_001255978.2; NM_001255979.2; NM_001255980.2; NM_001255981.2; NM_130898.4; XM_006711172.2; XM_017000372.1; XM_024453343.1; XM_024453344.1; XM_024453346.1	3-4 (XM_017000372.1,NM_001255981.2,NM_130898.4,NM_001255979.2,NM_001255978.2,XM_024453344.1,NM_001255980.2,XM_024453346.1,XM_024453343.1,XM_006711172.2)	2054
CREB3L4	CREB3L4_05	CREB3L4	NM_001255978.2; NM_001255979.2; NM_001255980.2; NM_001255981.2; NM_130898.4; NR_045658.2; XM_006711172.2; XM_017000372.1; XM_024453343.1; XM_024453344.1; XM_024453346.1	8-9 (NR_045658.2); 9-10 (XM_017000372.1,NM_001255981.2,NM_130898.4,NM_001255979.2,NM_001255978.2,XM_024453344.1,NM_001255980.2,XM_024453346.1,XM_024453343.1,XM_006711172.2)	2055
CREB5	CREB5_01	CREB5	NM_001011666.3; NM_004904.3; NM_182898.4; NM_182899.4; XM_005249906.1; XM_017012806.1; XM_017012807.1; XM_017012808.1; XM_017012809.1; XM_017012810.1; XM_024447005.1; XR_001744893.2	4 (NM_001011666.3,XR_001744893.2,XM_017012810.1); 7 (XM_024447005.1,NM_182899.4); 8 (NM_182898.4,XM_005249906.1,NM_004904.3); 9 (XM_017012808.1,XM_017012806.1,XM_017012807.1,XM_017012809.1)	2056
CREB5	CREB5_02	CREB5	NM_001011666.3; NM_004904.3; NM_182898.4; NM_182899.4; XM_005249906.1; XM_017012806.1; XM_017012807.1; XM_017012808.1; XM_017012809.1; XM_017012810.1; XM_024447005.1; XR_001744893.2	2 (NM_001011666.3,XR_001744893.2,XM_017012810.1); 5 (XM_024447005.1,NM_182899.4); 6 (NM_182898.4,XM_005249906.1,NM_004904.3); 7 (XM_017012808.1,XM_017012806.1,XM_017012807.1,XM_017012809.1)	2057
CREB5	CREB5_03	CREB5	NM_001011666.3; NM_004904.3; NM_182898.4; NM_182899.4; XM_005249906.1; XM_017012806.1; XM_017012807.1; XM_017012808.1; XM_017012809.1; XM_017012810.1; XM_024447005.1; XR_001744893.2	10 (XM_024447005.1,NM_182899.4); 11 (NM_182898.4,XM_005249906.1,NM_004904.3); 12 (XM_017012808.1,XM_017012806.1,XM_017012807.1); 13 (XM_017012809.1); 7 (NM_001011666.3,XR_001744893.2); 8 (XM_017012810.1)	2058
CREB5	CREB5_04	CREB5	NM_001011666.3; NM_004904.3; NM_182898.4; NM_182899.4; XM_005249906.1; XM_017012806.1; XM_017012807.1; XM_017012808.1; XM_017012809.1; XM_024447005.1; XR_001744893.2	10 (XM_024447005.1,NM_182899.4); 11 (NM_182898.4,XM_005249906.1,NM_004904.3); 12 (XM_017012808.1,XM_017012806.1,XM_017012807.1); 13 (XM_017012809.1); 7 (NM_001011666.3,XR_001744893.2)	2059
CREB5	CREB5_05	CREB5	NM_001011666.3; NM_004904.3; NM_182898.4; NM_182899.4; XM_005249906.1; XM_017012806.1; XM_017012807.1; XM_017012808.1; XM_017012809.1; XM_024447005.1; XR_001744893.2	10 (XM_024447005.1,NM_182899.4); 11 (NM_182898.4,XM_005249906.1,NM_004904.3); 12 (XM_017012808.1,XM_017012806.1,XM_017012807.1); 13 (XM_017012809.1); 7 (NM_001011666.3,XR_001744893.2)	2060
CREBBP	CREBBP_01	CREBBP	NM_001079846.1; NM_004380.3; XM_005255124.4; XM_005255125.4; XM_006720848.3; XM_011522381.2; XM_011522382.3; XM_017022944.1	2 (XM_011522381.2); 3 (XM_005255125.4,XM_017022944.1,NM_004380.3,XM_005255124.4,NM_001079846.1,XM_006720848.3,XM_011522382.3)	2061
CREBBP	CREBBP_02	CREBBP	NM_001079846.1; NM_004380.3; XM_005255124.4; XM_005255125.4; XM_006720848.3; XM_011522381.2; XM_017022944.1	29 (XM_006720848.3); 30 (XM_005255125.4,XM_011522381.2,XM_005255124.4,NM_001079846.1); 31 (XM_017022944.1,NM_004380.3)	2062
CREBBP	CREBBP_03	CREBBP	NM_001079846.1; NM_004380.3; XM_005255124.4; XM_005255125.4; XM_006720848.3; XM_011522381.2; XM_011522382.3; XM_017022944.1	8 (XM_011522381.2,NM_001079846.1); 9 (XM_005255125.4,XM_017022944.1,NM_004380.3,XM_005255124.4,XM_006720848.3,XM_011522382.3)	2063
CREBBP	CREBBP_04	CREBBP	NM_001079846.1; NM_004380.3; XM_005255124.4; XM_005255125.4; XM_006720848.3; XM_011522381.2; XM_011522382.3; XM_017022944.1	2-3 (XM_011522381.2); 3-4 (XM_005255125.4,XM_017022944.1,NM_004380.3,XM_005255124.4,NM_001079846.1,XM_006720848.3,XM_011522382.3)	2064
CREBBP	CREBBP_05	CREBBP	NM_001079846.1; NM_004380.3; XM_005255124.4; XM_005255125.4; XM_006720848.3; XM_011522381.2; XM_017022944.1	21-22 (XM_005255125.4,XM_011522381.2,XM_005255124.4,NM_001079846.1); 22-23 (XM_017022944.1,NM_004380.3,XM_006720848.3)	2065
CRLF2	CRLF2_01	CRLF2	NM_001012288.2; NM_022148.4; NR_110830.2; XM_011545634.2; XM_011546181.2	7 (NM_001012288.2); 8 (NM_022148.4,XM_011545634.2,NR_110830.2,XM_011546181.2)	2066
CRLF2	CRLF2_02	CRLF2	NM_001012288.2; NM_022148.4; NR_110830.2; XM_011545634.2; XM_011546181.2	7 (NM_001012288.2); 8 (NM_022148.4,XM_011545634.2,NR_110830.2,XM_011546181.2)	2067
CRLF2	CRLF2_03	CRLF2	NM_001012288.2; NM_022148.4; NR_110830.2; XM_011545634.2; XM_011545635.2; XM_011546181.2; XM_011546182.2	3 (NM_001012288.2); 4 (NM_022148.4,XM_011545634.2,NR_110830.2,XM_011546181.2,XM_011546182.2,XM_011545635.2)	2068
CRLF2	CRLF2_04	CRLF2	NM_001012288.2; NM_022148.4; XM_011545634.2; XM_011546181.2	4 (NM_001012288.2); 5 (NM_022148.4,XM_011545634.2,XM_011546181.2)	2069
CRLF2	CRLF2_05	CRLF2	NM_001012288.2; NM_022148.4; NR_110830.2; XM_011545634.2; XM_011545635.2; XM_011546181.2; XM_011546182.2	2 (NM_001012288.2); 3 (NM_022148.4,XM_011545634.2,NR_110830.2,XM_011546181.2,XM_011546182.2,XM_011545635.2)	2070
CRP	CRP_01	CRP	NM_000567.3; NM_001329057.2	2 (NM_000567.3,NM_001329057.2)	2071
CRP	CRP_02	CRP	NM_000567.3; NM_001329057.2	2 (NM_000567.3,NM_001329057.2)	2072
CRP	CRP_03	CRP	NM_000567.3; NM_001329057.2	2 (NM_000567.3,NM_001329057.2)	2073
CRP	CRP_04	CRP	NM_000567.3	2 (NM_000567.3)	2074
CRP	CRP_05	CRP	NM_000567.3; NM_001329057.2	2 (NM_000567.3,NM_001329057.2)	2075
CSF1	CSF1_01	CSF1	NM_000757.6; NM_172210.3; NM_172211.4; NM_172212.3; XM_017000369.1	1-2 (NM_172210.3,NM_172212.3,NM_172211.4,NM_000757.6,XM_017000369.1)	2076
CSF1	CSF1_02	CSF1	NM_000757.6; NM_172210.3; NM_172211.4; NM_172212.3; XM_017000369.1	5 (NM_172210.3,NM_172212.3,NM_172211.4,NM_000757.6,XM_017000369.1)	2077
CSF1	CSF1_03	CSF1	NM_000757.6; NM_172211.4; XM_017000369.1	9 (NM_172211.4,NM_000757.6,XM_017000369.1)	2078
CSF1	CSF1_04	CSF1	NM_000757.6; NM_172210.3; NM_172211.4; NM_172212.3; XM_017000369.1	2 (NM_172210.3,NM_172212.3,NM_172211.4,NM_000757.6,XM_017000369.1)	2079
CSF1	CSF1_05	CSF1	NM_000757.6; NM_172210.3; NM_172212.3; XM_017000369.1	6 (NM_172210.3,NM_172212.3,NM_000757.6,XM_017000369.1)	2080
CSF1R	CSF1R_01	CSF1R	NM_001288705.3; NM_001349736.1; NM_001375320.1; NM_001375321.1; NM_005211.3; NR_109969.1; NR_164679.1	2 (NM_001375321.1,NM_001288705.3,NR_164679.1,NR_109969.1); 3 (NM_005211.3); 4 (NM_001375320.1,NM_001349736.1)	2081
CSF1R	CSF1R_02	CSF1R	NM_001288705.3; NM_001349736.1; NM_001375320.1; NM_001375321.1; NM_005211.3; NR_109969.1; NR_164679.1	4 (NM_001375321.1,NM_001288705.3,NR_164679.1,NR_109969.1); 5 (NM_005211.3); 6 (NM_001375320.1,NM_001349736.1)	2082
CSF1R	CSF1R_03	CSF1R	NM_001288705.3; NM_001349736.1; NM_001375320.1; NM_001375321.1; NM_005211.3; NR_109969.1; NR_164679.1	10 (NM_005211.3); 11 (NM_001375320.1,NM_001349736.1); 9 (NM_001375321.1,NM_001288705.3,NR_164679.1,NR_109969.1)	2083
CSF1R	CSF1R_04	CSF1R	NM_001288705.3; NM_001349736.1; NM_001375320.1; NM_001375321.1; NM_005211.3; NR_109969.1; NR_164679.1	10 (NM_005211.3); 11 (NM_001375320.1,NM_001349736.1); 9 (NM_001375321.1,NM_001288705.3,NR_164679.1,NR_109969.1)	2084
CSF1R	CSF1R_05	CSF1R	NM_001288705.3; NM_001349736.1; NM_001375320.1; NM_001375321.1; NM_005211.3; NR_109969.1; NR_164679.1	13 (NM_001375321.1,NM_001288705.3,NR_164679.1,NR_109969.1); 14 (NM_005211.3); 15 (NM_001375320.1,NM_001349736.1)	2085
CSF2	CSF2_01	CSF2	NM_000758.4	1 (NM_000758.4)	2086
CSF2	CSF2_02	CSF2	NM_000758.4	2-3 (NM_000758.4)	2087
CSF2RB	CSF2RB_01	CSF2RB	NM_000395.3; XM_005261340.3; XM_011529903.2; XM_011529904.2	14 (XM_011529904.2,XM_005261340.3,XM_011529903.2,NM_000395.3)	2088
CSF2RB	CSF2RB_02	CSF2RB	NM_000395.3; XM_005261340.3; XM_011529903.2; XM_011529904.2	14 (XM_011529904.2,XM_005261340.3,XM_011529903.2,NM_000395.3)	2089
CSF2RB	CSF2RB_03	CSF2RB	NM_000395.3; XM_005261340.3; XM_011529903.2; XM_011529904.2	14 (XM_011529904.2,XM_005261340.3,XM_011529903.2,NM_000395.3)	2090
CSF2RB	CSF2RB_04	CSF2RB	NM_000395.3; XM_005261340.3; XM_011529903.2; XM_011529904.2; XM_011529905.2	8 (XM_011529904.2,XM_005261340.3,XM_011529903.2,NM_000395.3,XM_011529905.2)	2091
CSF2RB	CSF2RB_05	CSF2RB	NM_000395.3; XM_005261340.3; XM_011529903.2; XM_011529904.2; XM_011529905.2	5 (XM_011529904.2,XM_005261340.3,XM_011529903.2,NM_000395.3,XM_011529905.2)	2092
CSF3	CSF3_01	CSF3	NM_000759.4; NM_001178147.2; NM_172219.3; NM_172220.3; NR_033662.2	4 (NM_001178147.2,NM_172220.3,NR_033662.2); 5 (NM_000759.4,NM_172219.3)	2093
CSF3	CSF3_02	CSF3	NM_000759.4; NM_001178147.2; NM_172219.3; NM_172220.3; NR_033662.2	4 (NM_001178147.2,NM_172220.3,NR_033662.2); 5 (NM_000759.4,NM_172219.3)	2094
CSF3	CSF3_03	CSF3	NM_000759.4; NM_001178147.2; NM_172219.3; NM_172220.3; NR_033662.2	4 (NM_001178147.2,NM_172220.3,NR_033662.2); 5 (NM_000759.4,NM_172219.3)	2095
CSF3R	CSF3R_01	CSF3R	NM_000760.4; NM_156039.3; NM_172313.3; XM_005270493.1; XM_011540749.1	2 (NM_000760.4,NM_172313.3,XM_011540749.1,XM_005270493.1,NM_156039.3)	2096
CSF3R	CSF3R_02	CSF3R	NM_000760.4; NM_156039.3; NM_172313.3; XM_005270493.1; XM_011540748.3; XM_011540749.1; XM_017000370.1	5 (XM_011540748.3,XM_017000370.1); 6 (NM_000760.4,NM_172313.3,XM_011540749.1,XM_005270493.1,NM_156039.3)	2097
CSF3R	CSF3R_03	CSF3R	NM_000760.4; NM_156039.3; NM_172313.3; XM_005270493.1; XM_011540748.3; XM_011540749.1; XM_011540750.1; XM_017000370.1	11 (XM_011540748.3,XM_017000370.1); 12 (NM_000760.4,NM_172313.3,XM_011540749.1,XM_005270493.1,NM_156039.3); 7 (XM_011540750.1)	2098
CSF3R	CSF3R_04	CSF3R	NM_000760.4; NM_156039.3; NM_172313.3; XM_005270493.1; XM_011540748.3; XM_011540749.1; XM_011540750.1; XM_017000370.1	12-13 (XM_011540748.3,XM_017000370.1); 13-14 (NM_000760.4,NM_172313.3,XM_011540749.1,XM_005270493.1,NM_156039.3); 8-9 (XM_011540750.1)	2099
CSF3R	CSF3R_05	CSF3R	NM_000760.4; NM_156039.3; NM_172313.3; XM_005270493.1; XM_011540748.3; XM_011540749.1; XM_011540750.1; XM_017000370.1	10 (NM_000760.4,NM_172313.3,XM_011540749.1,XM_005270493.1,NM_156039.3); 5 (XM_011540750.1); 9 (XM_011540748.3,XM_017000370.1)	2100
CST2	CST2_01	CST2	NM_001322.3	1 (NM_001322.3)	2101
CT45A1	CT45A1_01	CT45A1	NM_001017417.2; XM_005278141.4	1 (NM_001017417.2,XM_005278141.4)	2102
CTAG1B	CTAG1B_01	CTAG1A; CTAG1B	NM_001327.2; NM_139250.2	2 (NM_001327.2)	2103
CTAG1B	CTAG1B_02	CTAG1A; CTAG1B	NM_001327.2; NM_139250.2	2-3 (NM_001327.2)	2104
CTAGE1	CTAGE1_01	CTAGE1	NM_172241.3	1 (NM_172241.3)	2105
CTAGE1	CTAGE1_02	CTAGE1	NM_172241.3	1 (NM_172241.3)	2106
CTAGE1	CTAGE1_03	CTAGE1	NM_172241.3	1 (NM_172241.3)	2107
CTAGE1	CTAGE1_04	CTAGE1	NM_172241.3	1 (NM_172241.3)	2108
CTAGE1	CTAGE1_05	CTAGE1	NM_172241.3	1 (NM_172241.3)	2109
CTCFL	CTCFL_01	CTCFL	NM_001269040.1; NM_001269041.1; NM_001269042.1; NM_001269043.1; NM_001269046.1; NM_080618.3	10 (NM_001269041.1,NM_001269046.1); 11 (NM_001269042.1,NM_001269040.1); 11-12 (NM_001269043.1); 12 (NM_080618.3)	2110
CTCFL	CTCFL_02	CTCFL	NM_001269040.1; NM_001269041.1; NM_001269042.1; NM_001269046.1; NM_080618.3	10 (NM_001269041.1,NM_001269046.1); 11 (NM_001269042.1,NM_001269040.1); 12 (NM_080618.3)	2111
CTCFL	CTCFL_03	CTCFL	NM_001269040.1; NM_001269041.1; NM_001269042.1; NM_001269043.1; NM_001269044.1; NM_001269045.1; NM_001269046.1; NM_001269047.1; NM_001269048.1; NM_001269049.1; NM_001269050.2; NM_001269054.1; NM_001269055.2; NM_080618.3; NR_072975.1	10 (NM_080618.3); 5 (NM_001269048.1); 7 (NM_001269055.2,NM_001269054.1); 8 (NM_001269041.1,NM_001269046.1,NM_001269044.1,NM_001269050.2,NM_001269049.1); 9 (NM_001269042.1,NM_001269040.1,NM_001269043.1,NR_072975.1,NM_001269047.1,NM_001269045.1)	2112
CTCFL	CTCFL_04	CTCFL	NM_001269040.1; NM_001269041.1; NM_001269042.1; NM_001269043.1; NM_001269044.1; NM_001269045.1; NM_001269046.1; NM_001269047.1; NM_001269048.1; NM_001269049.1; NM_001269050.2; NM_001269054.1; NM_001269055.2; NM_080618.3; NR_072975.1	10-11 (NM_080618.3); 5-6 (NM_001269048.1); 7-8 (NM_001269055.2,NM_001269054.1); 8-9 (NM_001269041.1,NM_001269046.1,NM_001269044.1,NM_001269050.2,NM_001269049.1); 9-10 (NM_001269042.1,NM_001269040.1,NM_001269043.1,NR_072975.1,NM_001269047.1,NM_001269045.1)	2113
CTCFL	CTCFL_05	CTCFL	NM_001269040.1; NM_001269041.1; NM_001269042.1; NM_001269043.1; NM_001269044.1; NM_001269045.1; NM_001269046.1; NM_001269047.1; NM_001269048.1; NM_001269049.1; NM_001269050.2; NM_001269051.1; NM_001269052.1; NM_001269054.1; NM_001269055.2; NM_080618.3; NR_072975.1	2 (NM_001269055.2,NM_001269054.1); 3 (NM_001269041.1,NM_001269044.1,NR_072975.1,NM_001269048.1,NM_001269050.2,NM_001269049.1,NM_001269052.1); 4 (NM_001269042.1,NM_001269040.1,NM_001269046.1,NM_001269043.1,NM_001269047.1,NM_001269045.1,NM_001269051.1); 5 (NM_080618.3)	2114
CTLA4	CTLA4_01	CTLA4	NM_001037631.3; NM_005214.5	1 (NM_005214.5,NM_001037631.3)	2115
CTLA4	CTLA4_02	CTLA4	NM_001037631.3; NM_005214.5	2 (NM_005214.5,NM_001037631.3)	2116
CTLA4	CTLA4_03	CTLA4	NM_001037631.3; NM_005214.5	2 (NM_005214.5,NM_001037631.3)	2117
CTLA4	CTLA4_04	CTLA4	NM_001037631.3; NM_005214.5	2 (NM_005214.5,NM_001037631.3)	2118
CTLA4	CTLA4_05	CTLA4	NM_001037631.3; NM_005214.5	2-3 (NM_005214.5,NM_001037631.3)	2119
CTNNB1	CTNNB1_01	CTNNB1	NM_001098209.2; NM_001098210.2; NM_001330729.2; NM_001904.4; XM_006712983.2; XM_006712985.1; XM_017005738.1; XM_024453356.1; XM_024453357.1; XM_024453358.1; XM_024453359.1; XM_024453360.1	3 (NM_001098210.2,NM_001098209.2,XM_017005738.1,NM_001904.4,XM_024453357.1,XM_006712985.1); 4 (XM_024453356.1,NM_001330729.2,XM_006712983.2,XM_024453359.1,XM_024453358.1,XM_024453360.1)	2120
CTNNB1	CTNNB1_02	CTNNB1	NM_001098209.2; NM_001098210.2; NM_001330729.2; NM_001904.4; XM_006712983.2; XM_006712985.1; XM_017005738.1; XM_024453356.1; XM_024453357.1; XM_024453358.1; XM_024453359.1; XM_024453360.1	5 (NM_001098210.2,NM_001098209.2,XM_017005738.1,NM_001904.4,XM_024453357.1,XM_006712985.1); 6 (XM_024453356.1,NM_001330729.2,XM_006712983.2,XM_024453359.1,XM_024453358.1,XM_024453360.1)	2121
CTNNB1	CTNNB1_03	CTNNB1	NM_001098209.2; NM_001098210.2; NM_001330729.2; NM_001904.4; XM_006712983.2; XM_006712985.1; XM_017005738.1; XM_024453356.1; XM_024453357.1; XM_024453358.1; XM_024453359.1; XM_024453360.1	5 (NM_001098210.2,NM_001098209.2,XM_017005738.1,NM_001904.4,XM_024453357.1,XM_006712985.1); 6 (XM_024453356.1,NM_001330729.2,XM_006712983.2,XM_024453359.1,XM_024453358.1,XM_024453360.1)	2122
CTNNB1	CTNNB1_04	CTNNB1	NM_001098209.2; NM_001098210.2; NM_001330729.2; NM_001904.4; XM_006712983.2; XM_006712985.1; XM_017005738.1; XM_024453356.1; XM_024453357.1; XM_024453358.1; XM_024453359.1; XM_024453360.1	8 (NM_001098210.2,NM_001098209.2,XM_017005738.1,NM_001904.4,XM_024453357.1,XM_006712985.1); 9 (XM_024453356.1,NM_001330729.2,XM_006712983.2,XM_024453359.1,XM_024453358.1,XM_024453360.1)	2123
CTNNB1	CTNNB1_05	CTNNB1	NM_001098209.2; NM_001098210.2; NM_001330729.2; NM_001904.4; XM_006712983.2; XM_006712985.1; XM_017005738.1; XM_024453356.1; XM_024453357.1; XM_024453358.1; XM_024453359.1; XM_024453360.1	10 (NM_001098210.2,NM_001098209.2,XM_017005738.1,NM_001904.4,XM_024453357.1,XM_006712985.1); 11 (XM_024453356.1,NM_001330729.2,XM_006712983.2,XM_024453359.1,XM_024453358.1,XM_024453360.1)	2124
CTSG	CTSG_01	CTSG	NM_001911.3; XM_011536499.1	3-4 (NM_001911.3,XM_011536499.1)	2125
CTSG	CTSG_02	CTSG	NM_001911.3; XM_011536499.1	2 (NM_001911.3,XM_011536499.1)	2126
CTSG	CTSG_03	CTSG	NM_001911.3; XM_011536499.1	4 (NM_001911.3,XM_011536499.1)	2127
CTSH	CTSH_01	CTSH	NM_001319137.1; NM_004390.5; XM_005254181.2; XM_017021951.1; XM_017021952.2; XM_024449852.1; XM_024449853.1; XM_024449854.1; XM_024449855.1	10 (NM_001319137.1,XM_024449852.1,XM_017021951.1); 7 (XM_024449853.1); 9 (XM_024449855.1,XM_005254181.2,NM_004390.5,XM_017021952.2,XM_024449854.1)	2128
CTSH	CTSH_02	CTSH	NM_001319137.1; NM_004390.5; XM_005254181.2; XM_017021951.1; XM_017021952.2; XM_024449852.1; XM_024449853.1; XM_024449854.1; XM_024449855.1	10 (XM_024449853.1); 12 (XM_024449855.1,XM_005254181.2,NM_004390.5,XM_017021952.2,XM_024449854.1); 13 (NM_001319137.1,XM_024449852.1,XM_017021951.1)	2129
CTSH	CTSH_03	CTSH	NM_001319137.1; NM_004390.5; XM_005254181.2; XM_017021951.1; XM_017021952.2; XM_024449852.1; XM_024449853.1; XM_024449854.1; XM_024449855.1	2 (XM_024449853.1); 5 (XM_024449855.1,XM_005254181.2,XM_024449852.1,NM_004390.5,XM_017021952.2,XM_024449854.1); 6 (NM_001319137.1,XM_017021951.1)	2130
CTSH	CTSH_04	CTSH	NM_001319137.1; NM_004390.5; XM_005254181.2; XM_017021951.1; XM_017021952.2; XM_024449852.1; XM_024449853.1; XM_024449854.1; XM_024449855.1	10 (XM_024449855.1,XM_005254181.2,NM_004390.5,XM_017021952.2,XM_024449854.1); 11 (NM_001319137.1,XM_024449852.1,XM_017021951.1); 8 (XM_024449853.1)	2131
CTSH	CTSH_05	CTSH	NM_001319137.1; NM_004390.5; XM_005254181.2; XM_017021951.1; XM_017021952.2; XM_024449852.1; XM_024449853.1; XM_024449854.1; XM_024449855.1	10 (XM_024449853.1); 12 (XM_024449855.1,XM_005254181.2,NM_004390.5,XM_017021952.2,XM_024449854.1); 13 (NM_001319137.1,XM_024449852.1,XM_017021951.1)	2132
CTSL	CTSL_01	CTSL	NM_001257971.2; NM_001257972.2; NM_001257973.2; NM_001912.5; NM_145918.3; XM_005251716.4	5 (NM_001257973.2); 7 (NM_145918.3,NM_001912.5,NM_001257971.2,NM_001257972.2); 8 (XM_005251716.4)	2133
CTSL	CTSL_02	CTSL	NM_001257971.2; NM_001257972.2; NM_001257973.2; NM_001912.5; NM_145918.3; XM_005251716.4; XM_011518263.1; XM_017014293.2	4-5 (NM_001257973.2); 6-7 (NM_145918.3,NM_001912.5,NM_001257971.2,NM_001257972.2,XM_017014293.2,XM_011518263.1); 7-8 (XM_005251716.4)	2134
CTSL	CTSL_03	CTSL	NM_001257971.2; NM_001257972.2; NM_001257973.2; NM_001912.5; NM_145918.3; XM_005251716.4; XM_011518263.1; XM_017014293.2	2 (NM_145918.3,NM_001912.5,NM_001257971.2,NM_001257972.2,XM_017014293.2,XM_011518263.1); 2-3 (NM_001257973.2); 3 (XM_005251716.4)	2135
CTSL	CTSL_04	CTSL	NM_001257971.2; NM_001257972.2; NM_001257973.2; NM_001912.5; NM_145918.3; XM_005251716.4; XM_011518263.1; XM_017014293.2	3 (NM_001257973.2); 5 (NM_145918.3,NM_001912.5,NM_001257971.2,NM_001257972.2,XM_017014293.2,XM_011518263.1); 6 (XM_005251716.4)	2136
CTSS	CTSS_01	CTSS	NM_001199739.2; NM_004079.5	4-5 (NM_001199739.2); 5-6 (NM_004079.5)	2137
CTSS	CTSS_02	CTSS	NM_001199739.2; NM_004079.5	5 (NM_001199739.2); 6 (NM_004079.5)	2138
CTSS	CTSS_03	CTSS	NM_001199739.2; NM_004079.5	2 (NM_001199739.2,NM_004079.5)	2139
CTSS	CTSS_04	CTSS	NM_001199739.2; NM_004079.5	3 (NM_001199739.2,NM_004079.5)	2140
CTSS	CTSS_05	CTSS	NM_001199739.2; NM_004079.5	6 (NM_001199739.2); 7 (NM_004079.5)	2141
CTSW	CTSW_01	CTSW	NM_001335.4	9 (NM_001335.4)	2142
CTSW	CTSW_02	CTSW	NM_001335.4	2 (NM_001335.4)	2143
CTSW	CTSW_03	CTSW	NM_001335.4	10 (NM_001335.4)	2144
CTSW	CTSW_04	CTSW	NM_001335.4	7-8 (NM_001335.4)	2145
CTSW	CTSW_05	CTSW	NM_001335.4	4 (NM_001335.4)	2146
CUL1	CUL1_01	CUL1	NM_001370660.1; NM_001370661.1; NM_001370662.1; NM_001370663.1; NM_001370664.1; NM_003592.3	4 (NM_001370662.1,NM_003592.3,NM_001370660.1,NM_001370664.1,NM_001370661.1,NM_001370663.1)	2147
CUL1	CUL1_02	CUL1	NM_001370660.1; NM_001370661.1; NM_001370662.1; NM_001370663.1; NM_001370664.1; NM_003592.3	21 (NM_001370662.1,NM_003592.3,NM_001370660.1,NM_001370664.1,NM_001370661.1,NM_001370663.1)	2148
CUL1	CUL1_03	CUL1	NM_001370660.1; NM_001370661.1; NM_001370662.1; NM_001370663.1; NM_001370664.1; NM_003592.3	22 (NM_001370662.1,NM_003592.3,NM_001370660.1,NM_001370664.1,NM_001370661.1,NM_001370663.1)	2149
CUL1	CUL1_04	CUL1	NM_001370660.1; NM_001370661.1; NM_001370662.1; NM_001370663.1; NM_001370664.1; NM_003592.3	11 (NM_001370662.1,NM_003592.3,NM_001370660.1,NM_001370664.1,NM_001370661.1,NM_001370663.1)	2150
CUL1	CUL1_05	CUL1	NM_001370660.1; NM_001370661.1; NM_001370662.1; NM_001370663.1; NM_001370664.1; NM_003592.3	10 (NM_001370662.1,NM_003592.3,NM_001370660.1,NM_001370664.1,NM_001370661.1,NM_001370663.1)	2151
CX3CL1	CX3CL1_01	CX3CL1	NM_001304392.3; NM_002996.6	1 (NM_002996.6,NM_001304392.3)	2152
CX3CL1	CX3CL1_02	CX3CL1	NM_001304392.3; NM_002996.6	2 (NM_001304392.3); 3 (NM_002996.6)	2153
CX3CL1	CX3CL1_03	CX3CL1	NM_001304392.3; NM_002996.6	2 (NM_001304392.3); 3 (NM_002996.6)	2154
CX3CL1	CX3CL1_04	CX3CL1	NM_001304392.3; NM_002996.6	2 (NM_001304392.3); 3 (NM_002996.6)	2155
CX3CL1	CX3CL1_05	CX3CL1	NM_001304392.3; NM_002996.6	2 (NM_001304392.3); 3 (NM_002996.6)	2156
CX3CR1	CX3CR1_01	CX3CR1	NM_001171171.1; NM_001171172.1; NM_001171174.1; NM_001337.4	2 (NM_001337.4,NM_001171174.1,NM_001171171.1,NM_001171172.1)	2157
CX3CR1	CX3CR1_02	CX3CR1	NM_001171171.1; NM_001171172.1; NM_001171174.1; NM_001337.4	2 (NM_001337.4,NM_001171174.1,NM_001171171.1,NM_001171172.1)	2158
CX3CR1	CX3CR1_03	CX3CR1	NM_001171171.1; NM_001171172.1; NM_001171174.1; NM_001337.4	2 (NM_001337.4,NM_001171174.1,NM_001171171.1,NM_001171172.1)	2159
CX3CR1	CX3CR1_04	CX3CR1	NM_001171171.1; NM_001171172.1; NM_001171174.1; NM_001337.4	2 (NM_001337.4,NM_001171174.1,NM_001171171.1,NM_001171172.1)	2160
CX3CR1	CX3CR1_05	CX3CR1	NM_001171171.1; NM_001171172.1; NM_001171174.1; NM_001337.4	2 (NM_001337.4,NM_001171174.1,NM_001171171.1,NM_001171172.1)	2161
CXADR	CXADR_01	CXADR	NM_001207066.1; XM_011529477.2	6 (XM_011529477.2); 8 (NM_001207066.1)	2162
CXADR	CXADR_02	CXADR	NM_001207063.2; NM_001207064.2; NM_001207065.2; NM_001207066.1; NM_001338.5; XM_011529476.2; XM_011529477.2; XM_011529478.2; XM_011529479.1; XR_001754814.1	1-2 (XM_011529477.2,NM_001207066.1,NM_001207063.2,XM_011529476.2,XM_011529478.2,NM_001207065.2,NM_001207064.2,XR_001754814.1,NM_001338.5,XM_011529479.1)	2163
CXADR	CXADR_03	CXADR; CXADRP2; CXADRP3	NM_001207063.2; NM_001207064.2; NM_001207065.2; NM_001207066.1; NM_001338.5; NR_024076.1; NR_024387.1; XM_011529476.2; XM_011529477.2; XM_011529478.2; XM_011529479.1; XR_001754814.1	2 (XM_011529477.2,NM_001207066.1,NM_001207063.2,XM_011529476.2,XM_011529478.2,NM_001207065.2,NM_001207064.2,XR_001754814.1,NM_001338.5,XM_011529479.1)	2164
CXADR	CXADR_04	CXADR	NM_001207063.2; NM_001207064.2; NM_001207065.2; NM_001338.5	3 (NM_001207065.2); 4 (NM_001207064.2); 5 (NM_001207063.2); 7 (NM_001338.5)	2165
CXADR	CXADR_05	CXADR	NM_001207063.2; NM_001207064.2; NM_001207065.2; NM_001338.5	3 (NM_001207065.2); 4 (NM_001207064.2); 5 (NM_001207063.2); 7 (NM_001338.5)	2166
CXCL1	CXCL1_01	CXCL1	NM_001511.4; NR_046035.2	1 (NR_046035.2,NM_001511.4)	2167
CXCL1	CXCL1_02	CXCL1	NM_001511.4; NR_046035.2	1 (NR_046035.2,NM_001511.4)	2168
[truncated: 6,663 more rows]

## Sheet: 16srRNA-CMV-fungal spike-in
Display Name	Accession	Position	Target Sequence
Microbial16S	rBAC_21119.1	24-123	GAACGCTGGCGGCATGCCTTACACATGCAAGTCGAACGGTAACAGGTCTTCGGATGCTGACGAGTGGCGAACGGGTGAGTAATACATCGGAACGTGCCCG
Microbial16S	rBAC_17856.1	347-446	CCTACGGGAGGCAGCAGTGGGGAATTTTGCACAATGGGGGAAACCCTGATGCAGCGACGCCGCGTGATTTAGAAGGCCTTCGGGTTGTAAAAATCTTTTG
Microbial16S	rBAC_19069.1	514-613	AGCCGCGGTAATACGGAGGGTGCAAGCGTTAATCGGAATTACTGGGCGTAAAGCGCACGCAGGCGGTCTGTCAAGTCGGATGTGAAATCCCCGGGCTCAA
Microbial16S	16SBac_05.1	730-829	GCAATCCCCTGGACCTGTACTGACGCTCATGCACGAAAGCGTGGGGAGCAAACAGGATTAGATACCCTGGTAGTCCACGCCCTAAACGATGTCAACTGGT
Microbial16S	rBAC_19069.1	921-1020	CCCGCACAAGCGGTGGAGCATGTGGTTTAATTCGATGCAACGCGAAGAACCTTACCTGGTCTTGACATCCACAGAACTTAGCAGAGATGCTTTGGTGCCT
Microbial16S	16SBac_06.1	1049-1148	GACACAGGTGCTGCATGGCTGTCGTCAGCTCGTGTCGTGAGATGTTGGGTTAAGTCCCGCAACGAGCGCAACCCTTGCCATTAGTTGCTACGAAAGGGCA
[truncated: 28 more rows]
